# Supplementary material for: mRNA-Seq Analysis of the Pseudoperonospora cubensis Transcriptome During Cucumber (Cucumis sativus L.) Infection
Source: PLoS One. 2012 Apr 24;7(4):e35796. doi: 10.1371/journal.pone.0035796 (PMC3335787; doi:10.1371/journal.pone.0035796)
Supplement: Table S1 — List of genes expressed in at least one time point of infection or in isolated sporangia. Shown are the gene ID, FPKM values of those genes at different time points and functional annotation. (XLSX) [file pone.0035796.s004.xlsx]

## Sheet: Sheet1
Table S1. List of genes expressed in at least one time point of infection or in isolated sporangia. Shown are the gene ID, FPKM values of those genes at different time-points and functional annotation.
Gene ID	1 dpi	2 dpi	3 dpi	4 dpi	6 dpi	8 dpi	Functional annotation
maker-pcu_contig_32223-snap-gene-0.0-mRNA-1	270121	55153.7	27896.3	13691.9	24271.2	2484.48	Elongation factor 1-alpha
maker-pcu_contig_23302-fgenesh-gene-0.0-mRNA-1	108010	23136.8	21457.6	4092.96	8074.52	991.819	Initiation factor 5a
maker-pcu_contig_9582-snap-gene-0.1-mRNA-1	97836	20709.1	10644.2	3235.81	8861.74	699.751	Elongation factor 1-alpha
maker-pcu_contig_26955-snap-gene-0.1-mRNA-1	63357.4	17363.8	2635.18	1776.49	2064.16	606.225	S-adenosylmethionine synthase
maker-pcu_contig_11064-snap-gene-0.0-mRNA-1	47619.5	8017.49	5233.05	1779.56	3273.81	505.064	Actin
maker-pcu_contig_27815-fgenesh-gene-0.0-mRNA-1	45468.7	13115.9	5670.74	1458.19	2556.49	572.996	HSC70-1 (heat shock cognate 70 kDa protein 1); ATP binding isoform 2
maker-pcu_contig_19713-snap-gene-0.0-mRNA-1	44469.5	8965.39	7493.65	2350.25	3500.73	458.701	Eukaryotic translation initiation factor 5A
maker-pcu_contig_9473-snap-gene-0.0-mRNA-1	42574.8	11535.2	2702.32	1898.51	4425.22	820.712	NAD-specific glutamate dehydrogenase
maker-pcu_contig_21508-snap-gene-0.1-mRNA-1	34848.9	8153.81	6159.63	1066.52	3227.26	154.727	Elongation factor 1-alpha
maker-pcu_contig_35794-snap-gene-0.0-mRNA-1	34345.7	15410.9	7490.05	3339.63	3403.48	669.446	60S ribosomal protein L8-3
maker-pcu_contig_27609-fgenesh-gene-0.0-mRNA-1	31970.7	4412.69	3171.04	973.901	5284.6	293.541	Elongation factor 1-alpha
maker-pcu_contig_17567-snap-gene-0.0-mRNA-1	21758.4	4791.92	4565.02	714.856	2716.32	276.372	ADP-ribosylation factor
maker-pcu_contig_19523-snap-gene-0.0-mRNA-1	21629.3	2587.65	5217.1	271.245	2444.31	125.857	Translationally controlled tumor protein
maker-pcu_contig_8928-snap-gene-0.1-mRNA-1	18625.3	4463.88	1184.4	612.971	1648.1	248.761	NAD-specific glutamate dehydrogenase
maker-pcu_contig_8512-snap-gene-0.1-mRNA-1	17007.9	1455.44	6224.37	734.261	1498.46	168.56	Catalase
maker-pcu_contig_4249-snap-gene-0.0-mRNA-1	16204.8	1642.61	4488.87	995.296	1307.58	320.811	RNA binding motif protein
maker-pcu_contig_12102-snap-gene-0.1-mRNA-1	15548	3006.05	613.7	347.034	931.106	109.615	70 kDa heat shock protein
maker-pcu_contig_398-snap-gene-0.0-mRNA-1	12146.9	1366.12	3153.48	547.547	1038.06	65.7142	NAD(P)H-quinone oxidoreductase subunit 2 A, chloroplastic
maker-pcu_contig_2034-snap-gene-0.0-mRNA-1	11041.5	0	794.32	0	197.972	0	ATP-dependent Clp protease proteolytic subunit
maker-pcu_contig_34652-snap-gene-0.0-mRNA-1	10857.3	1382.73	2118.19	0	1304.29	0	Histone H3
maker-pcu_contig_34892-snap-gene-0.0-mRNA-1	9679.27	1641.65	0	0	501.195	0	S-adenosylmethionine synthase 2
maker-pcu_contig_398-snap-gene-0.1-mRNA-1	9142.28	942.52	3000.39	384.994	502.255	32.0811	NADH dehydrogenase subunit B
maker-pcu_contig_14079-fgenesh-gene-0.0-mRNA-1	8572.32	10864.7	11008.6	12778.8	7775.8	8528.21	Elongation factor 1-alpha
maker-pcu_contig_16088-snap-gene-0.0-mRNA-1	7392.81	2045.36	2474.52	435.434	1245.81	196.493	Ubiquitin carrier protein
maker-pcu_contig_15654-snap-gene-0.0-mRNA-1	6758.32	3675.08	2796.83	730.92	1486.39	133.655	ADP-ribosylation factor
maker-pcu_contig_26424-snap-gene-0.0-mRNA-1	6544.72	3424.11	3134.31	1196.16	1146.57	184.015	ADP, ATP carrier protein
maker-pcu_contig_16608-snap-gene-0.1-mRNA-1	6240.65	6496.23	2492.94	1008.07	443.227	91.8608	Conserved gene of unknown function
maker-pcu_contig_2260-fgenesh-gene-0.0-mRNA-1	5942.01	4338.25	8838.21	4317.32	4182.51	3285.57	60S ribosomal protein L44
maker-pcu_contig_27164-snap-gene-0.1-mRNA-1	5876.23	1227.43	1452.47	402.947	724.012	150.413	Eukaryotic translation initiation factor 1A
maker-pcu_contig_34967-snap-gene-0.0-mRNA-1	4969.82	976.076	1996.2	0	884.483	0	GRF zinc finger family protein
maker-pcu_contig_1358-snap-gene-0.1-mRNA-1	4623.71	11878.1	5214.84	9116.87	5519.33	4853.54	GK22061
maker-pcu_contig_22840-snap-gene-0.0-mRNA-1	4516.95	2134.9	1043.22	558.369	666.972	139.982	Vacuolar ATPase subunit c
maker-pcu_contig_28756-snap-gene-0.0-mRNA-1	4247.7	1765.28	1295.45	0	614.301	59.3819	ADP-ribosylation factor
maker-pcu_contig_8513-snap-gene-0.0-mRNA-1	3240.32	1067.26	504.151	180.858	381.418	69.8424	Vacuolar proton-inorganic pyrophosphatase
maker-pcu_contig_3-fgenesh-gene-0.1-mRNA-1	3198.85	4298.67	4735.63	3837.32	2543.56	2734.88	60S ribosomal protein L3
maker-pcu_contig_121-fgenesh-gene-0.0-mRNA-1	3169.19	7501.64	6542.96	3704.18	3236.08	3049.88	Ribosomal protein L27
maker-pcu_contig_347-fgenesh-gene-0.5-mRNA-1	3142.26	4199.83	5213.15	2888.37	2297.71	2501.41	40S ribosomal protein S12
maker-pcu_contig_402-fgenesh-gene-0.1-mRNA-1	3130.73	5047.33	6538.99	4259.5	4631.54	3716.14	40S ribosomal protein S2
maker-pcu_contig_265-snap-gene-0.11-mRNA-1	3081.94	3894.93	4580.23	3281.37	2385.95	2652.39	60S ribosomal protein L7a-2
maker-pcu_contig_661-fgenesh-gene-0.0-mRNA-1	3068.12	5276.06	2175.96	4506.05	3973.84	4480.83	Actin
maker-pcu_contig_2586-fgenesh-gene-0.1-mRNA-1	3033.02	3158.05	3163.53	2201.99	1772.81	2010.27	60S ribosomal protein L9
maker-pcu_contig_21813-snap-gene-0.0-mRNA-1	2788.89	915.785	356.426	0	323.563	0	Ubiquitin carrier protein
maker-pcu_contig_79-fgenesh-gene-0.4-mRNA-1	2788.12	3318.18	4479.55	3289.73	2920.05	2623.16	60S ribosomal protein L6
maker-pcu_contig_593-snap-gene-0.5-mRNA-1	2730.14	1170.12	262.85	797.706	625.182	691.488	NAD-specific glutamate dehydrogenase
maker-pcu_contig_3404-snap-gene-0.0-mRNA-1	2697.92	342.805	621.296	115.249	169.253	12.6847	ATP synthase subunit beta, chloroplastic
maker-pcu_contig_9337-snap-gene-0.1-mRNA-1	2576.38	1389.09	743.791	254.864	376.797	47.0331	Tubulin beta-1 chain
maker-pcu_contig_1404-fgenesh-gene-0.0-mRNA-1	2471.97	3533.57	1795.49	4163.95	1633.27	1699.36	Conserved gene of unknown function
maker-pcu_contig_12686-fgenesh-gene-0.0-mRNA-1	2467.47	2742.29	486.39	476.947	343.062	50.8825	Adenosylhomocysteinase
maker-pcu_contig_2560-snap-gene-0.4-mRNA-1	2373.79	2503.96	4122.33	3395.49	2455.58	2401.82	60S ribosomal protein L4
maker-pcu_contig_7108-snap-gene-0.1-mRNA-1	2366.29	0	375.442	0	0	0	Elongation factor Tu
maker-pcu_contig_2900-snap-gene-0.2-mRNA-1	2354.26	0	0	0	0	0	30S ribosomal protein S17
maker-pcu_contig_23-snap-gene-0.21-mRNA-1	2304.63	3083.91	3321.58	2759.38	2510.7	2490.98	Ribosomal protein L28
maker-pcu_contig_2040-fgenesh-gene-0.2-mRNA-1	2127.65	2429.37	2930.06	2319.22	1521.4	1453.19	60S ribosomal protein L22
maker-pcu_contig_21-fgenesh-gene-0.6-mRNA-1	2117.11	5369.27	6474.38	4640.63	4537.46	4520.24	60S ribosomal protein L18-2
maker-pcu_contig_2900-snap-gene-0.3-mRNA-1	2080.46	0	160.672	0	0	0	50S ribosomal protein L2
maker-pcu_contig_7723-snap-gene-0.1-mRNA-1	2068.81	0	212.172	0	0	0	50S ribosomal protein L3
maker-pcu_contig_7-fgenesh-gene-0.15-mRNA-1	2022.52	3649.85	4122.04	3602.04	3487.01	3363.74	60S ribosomal protein L7
maker-pcu_contig_1586-fgenesh-gene-0.2-mRNA-1	2020.88	4023.25	4850.96	3486.13	2591.46	2968.8	40S ribosomal protein S9-1
maker-pcu_contig_269-fgenesh-gene-0.0-mRNA-1	1861.11	4334.23	579.504	7293.59	3680.55	3210.78	Proline-rich protein BstNI subfamily 3 precursor
maker-pcu_contig_12-fgenesh-gene-0.5-mRNA-1	1841.32	3984.91	3047.11	3114.6	1754.84	2023.65	40S ribosomal protein S3-3
maker-pcu_contig_481-fgenesh-gene-0.0-mRNA-1	1771.74	3171.78	4981.51	3850.81	3244.76	2513.4	RL11A, ribosomal protein 11A 60S large ribosomal subunit
maker-pcu_contig_702-fgenesh-gene-0.2-mRNA-1	1735.59	3796.33	5067.56	2895.49	2392.37	2426.23	60S ribosomal protein L23
maker-pcu_contig_957-snap-gene-0.5-mRNA-1	1689.99	1357.58	614.444	1023.45	728.893	884.648	Chromosome 04 contig 1, DNA sequence
maker-pcu_contig_18849-snap-gene-0.0-mRNA-1	1656.15	1902.49	542.676	0	253.055	0	S-adenosylmethionine synthase
maker-pcu_contig_15060-snap-gene-0.1-mRNA-1	1642.28	0	0	0	0	0	Phosphoglycerate kinase
maker-pcu_contig_315-fgenesh-gene-0.0-mRNA-1	1640.99	2396.08	584.224	1349.39	462.926	663.939	Elicitin protein RAM2A
maker-pcu_contig_7702-snap-gene-0.0-mRNA-1	1632.95	2083.51	2502.14	2300.56	1032.75	722.749	Calcineurin-like phosphoesterase
maker-pcu_contig_29011-snap-gene-0.0-mRNA-1	1615.85	0	0	0	0	0	Sulfite reductase flavoprotein
maker-pcu_contig_66-fgenesh-gene-0.8-mRNA-1	1526.23	1188.37	879.217	747.144	1529.89	1776.08	Beta-tubulin
maker-pcu_contig_2107-snap-gene-0.3-mRNA-1	1514.64	0	135.945	0	25.9149	5.9345	DNA-directed RNA polymerase subunit beta'
maker-pcu_contig_18025-snap-gene-0.0-mRNA-1	1513.14	2959.35	1408.52	3916.99	1257.13	976.902	Glucanase inhibitor protein 1
maker-pcu_contig_299-fgenesh-gene-0.1-mRNA-1	1481.76	2405.96	1228.45	3224.62	2002.99	1399.36	Glycosyl transferase
maker-pcu_contig_2900-snap-gene-0.1-mRNA-1	1468.98	0	403.76	0	0	0	50S ribosomal protein L14
maker-pcu_contig_989-fgenesh-gene-0.3-mRNA-1	1384.46	3907.75	2578.22	3578.61	2721.53	3646.85	Calmodulin
maker-pcu_contig_9366-snap-gene-0.0-mRNA-1	1384.46	0	0	0	0	0	50S ribosomal protein L9
maker-pcu_contig_36-fgenesh-gene-0.7-mRNA-1	1361.5	2441.47	2387.97	2262.55	1671.92	1791.96	60S ribosomal protein L13
maker-pcu_contig_423-fgenesh-gene-0.4-mRNA-1	1343.98	3029.79	4035.87	2514.54	2152.71	2106.39	40S ribosomal protein SA
maker-pcu_contig_5569-snap-gene-0.0-mRNA-1	1325.01	0	0	0	0	0	50S ribosomal protein L11
maker-pcu_contig_181-fgenesh-gene-0.2-mRNA-1	1307.49	3858.57	3151.02	3244.86	1937.18	2539.35	Ribosomal protein L15
maker-pcu_contig_957-fgenesh-gene-0.2-mRNA-1	1289.29	3822.03	7544.24	4498.55	4015.43	3787.8	60S ribosomal protein L10a-1
maker-pcu_contig_4808-snap-gene-0.2-mRNA-1	1284.66	0	154.8	0	0	0	Elongation factor Ts
maker-pcu_contig_1120-fgenesh-gene-0.0-mRNA-1	1235.98	1488.15	868.787	1656.28	1103.28	900.084	Histamine-releasing factor
maker-pcu_contig_8580-snap-gene-0.0-mRNA-1	1217.75	285.96	278.53	97.7892	162.543	26.8347	Cell division cycle protein 48 homolog
maker-pcu_contig_171-snap-gene-0.13-mRNA-1	1206.53	2820.37	1383.18	1490.07	1021.63	1124.4	3-hydroxyisobutyrate dehydrogenase
maker-pcu_contig_35-fgenesh-gene-0.10-mRNA-1	1180.64	967.841	1363.38	1180.49	738.702	648.474	Gene of unknown function
maker-pcu_contig_340-snap-gene-0.10-mRNA-1	1161.15	1799.61	1574.07	1494.74	1317.39	1271.13	Nascent polypeptide-associated complex subunit alpha
maker-pcu_contig_2373-fgenesh-gene-0.0-mRNA-1	1086.24	1745.01	928.906	1473.03	947.109	611.588	Conserved gene of unknown function
maker-pcu_contig_1628-fgenesh-gene-0.0-mRNA-1	976.673	1220.97	1974.55	1452.81	1329.72	1128.25	60S ribosomal protein L27
maker-pcu_contig_1756-snap-gene-0.2-mRNA-1	971.862	1643.18	2563.37	1643.1	1144.8	1227.9	40S ribosomal protein S4
maker-pcu_contig_589-snap-gene-0.3-mRNA-1	969.674	3760.48	5123.2	3306.3	2620.96	2533.89	40S ribosomal protein S6
maker-pcu_contig_136-fgenesh-gene-0.3-mRNA-1	965.017	392.632	307.81	333.08	238.675	268.044	Serine/threonine-protein phosphatase
maker-pcu_contig_1261-fgenesh-gene-0.0-mRNA-1	964.897	975.419	737.845	2088.12	1292.88	930.827	Calreticulin
maker-pcu_contig_12522-snap-gene-0.0-mRNA-1	960.663	1429.96	1045.89	383.563	404.929	113.755	Glutamine synthetase
maker-pcu_contig_6605-snap-gene-0.0-mRNA-1	941.703	3312.37	2036.72	3946.18	690.388	1519.17	Glucanase inhibitor protein 1
maker-pcu_contig_9473-snap-gene-0.1-mRNA-1	929.068	736.446	51.5592	43.8698	99.5091	17.9644	Heat shock protein 70
maker-pcu_contig_1108-snap-gene-0.4-mRNA-1	912.592	991.731	610.925	1049.43	937.624	293.156	Secretory protein OPEL
maker-pcu_contig_7-fgenesh-gene-0.10-mRNA-1	846.022	2349.34	996.794	1319.33	1163.13	1483.42	Conserved gene of unknown function
maker-pcu_contig_593-snap-gene-0.8-mRNA-1	826.723	1268.34	1260.6	1724.54	1087.54	997.791	Glucose regulated protein/BiP
maker-pcu_contig_5350-snap-gene-0.1-mRNA-1	800.233	873.297	369.638	388.675	232.319	883.145	PLAC8 family protein
maker-pcu_contig_11460-snap-gene-0.0-mRNA-1	755.521	116.127	0	139.046	0	0	NPP1
maker-pcu_contig_11082-snap-gene-0.1-mRNA-1	754.08	0	100.962	0	0	0	Fructose-bisphosphate aldolase
maker-pcu_contig_1359-fgenesh-gene-0.1-mRNA-1	753.362	742.452	436.097	1115.59	749.743	786.591	Elongation factor 1-gamma
maker-pcu_contig_17216-snap-gene-0.1-mRNA-1	741.802	0	203.151	0	0	0	Polyribonucleotide nucleotidyltransferase
maker-pcu_contig_662-snap-gene-0.6-mRNA-1	737.557	801.66	444.375	688.152	253.151	165.029	L-threonine 3-dehydrogenase
maker-pcu_contig_357-snap-gene-0.4-mRNA-1	686.933	219.292	116.734	95.0612	52.8984	99.0831	1-aminocyclopropane-1-carboxylate deaminase
maker-pcu_contig_4061-snap-gene-0.3-mRNA-1	676.883	1598.43	840.354	1829.89	1022.59	752.412	Inositol oxygenase
maker-pcu_contig_5569-snap-gene-0.1-mRNA-1	664.781	0	322.109	0	0	0	50S ribosomal protein L1
maker-pcu_contig_2107-fgenesh-gene-0.0-mRNA-1	641.529	0	167.261	0	0	0	DNA-directed RNA polymerase subunit beta
maker-pcu_contig_410-snap-gene-0.14-mRNA-1	629.676	393.186	371.473	565.959	271.842	260.252	Delta-6 desaturase
maker-pcu_contig_549-snap-gene-0.9-mRNA-1	614.501	2378.47	1379.96	2093.36	1454.03	2026.36	Conserved gene of unknown function
maker-pcu_contig_13280-snap-gene-0.1-mRNA-1	612.95	877.261	589.234	1138.73	81.8642	92.1251	Pectinesterase
maker-pcu_contig_4188-snap-gene-0.1-mRNA-1	612.253	166.09	204.933	454.849	326.115	203.934	Serine protease family S01A
maker-pcu_contig_1569-snap-gene-0.7-mRNA-1	605.085	98.1154	131.667	61.366	87.4926	69.3415	Appr-1-p processing domain protein
maker-pcu_contig_672-snap-gene-0.3-mRNA-1	604.566	1210.98	521.905	1132.83	1051.47	313.825	Secretory protein OPEL
maker-pcu_contig_4117-fgenesh-gene-0.0-mRNA-1	602.198	1527.25	984.801	1247.52	1210.01	1013.81	Glutathione S-transferase
maker-pcu_contig_910-snap-gene-0.3-mRNA-1	589.721	397.24	132.37	341.547	449.733	131.654	Transglutaminase elicitor M81D
maker-pcu_contig_68-fgenesh-gene-0.1-mRNA-1	588.184	987.336	1178.15	1090.93	1365.14	1461.06	Cellulose synthase 3
maker-pcu_contig_10-snap-gene-0.20-mRNA-1	580.491	418.667	421.485	460.816	603.471	622.265	Casein kinase
maker-pcu_contig_1310-snap-gene-0.4-mRNA-1	575.086	0	0	53.9925	86.3564	138.32	Conserved gene of unknown function
maker-pcu_contig_723-fgenesh-gene-0.2-mRNA-1	556.461	730.3	300.879	696.001	158.549	131.18	Glycoside hydrolase
maker-pcu_contig_2415-snap-gene-0.4-mRNA-1	527.584	2065.89	1536.84	1257.83	764.392	2003.66	Mucin
maker-pcu_contig_3655-fgenesh-gene-0.1-mRNA-1	527.354	515.815	0	517.334	211.17	1046.72	12-oxophytodienoate reductase
maker-pcu_contig_1978-snap-gene-0.4-mRNA-1	518.708	745.494	538.228	750.164	636.107	571.827	Glutathione peroxidase
maker-pcu_contig_6677-fgenesh-gene-0.0-mRNA-1	498.814	0	120.221	0	0	0	Dihydrolipoyl dehydrogenase
maker-pcu_contig_539-snap-gene-0.10-mRNA-1	497.503	695.169	762.983	774.396	633.873	610.345	Glucokinase
maker-pcu_contig_241-fgenesh-gene-0.6-mRNA-1	458.17	450.706	285.247	408.377	266.027	354.625	CG6370-PA
maker-pcu_contig_210-fgenesh-gene-0.3-mRNA-1	456.979	182.623	156.019	210.802	224.163	189.446	26S protease regulatory subunit S10B
maker-pcu_contig_10301-snap-gene-0.1-mRNA-1	456.979	70.2398	0	0	0	0	S-adenosylmethionine synthase 2
maker-pcu_contig_289-snap-gene-0.11-mRNA-1	421.642	87.9542	127.019	105.869	105.525	118.772	Hemagglutinin family protein
maker-pcu_contig_360-snap-gene-0.6-mRNA-1	419.559	317.48	220.374	352.998	348.935	401.789	Importin alpha-2 subunit
maker-pcu_contig_7083-snap-gene-0.2-mRNA-1	411.38	161.893	443.913	193.118	252.293	39.5561	Conserved gene of unknown function
maker-pcu_contig_27-fgenesh-gene-0.1-mRNA-1	393.221	802.508	280.787	530.471	325.853	574.395	Propionyl-CoA carboxylase beta chain, mitochondrial
maker-pcu_contig_403-snap-gene-0.12-mRNA-1	382.392	352.653	167.556	342.25	226.204	298.008	Ketol-acid reductoisomerase
maker-pcu_contig_56-fgenesh-gene-0.7-mRNA-1	377.58	507.814	139.022	373.634	440.988	314.055	Proline oxidase
maker-pcu_contig_357-snap-gene-0.3-mRNA-1	347.359	213.563	126.838	259.031	34.7735	43.8338	Elicitor-like transglutaminase M81
maker-pcu_contig_36-snap-gene-0.18-mRNA-1	337.065	419.178	221.542	292.035	453.998	552.248	4-coumarate-CoA ligase
maker-pcu_contig_283-snap-gene-0.9-mRNA-1	324.03	54.9797	84.5713	20.2535	70.9356	25.7097	Chromosome 14 open reading frame 106
maker-pcu_contig_178-fgenesh-gene-0.0-mRNA-1	321.557	306.434	161.447	261.266	231.772	319.545	Glucose-6-phosphate isomerase
maker-pcu_contig_9-fgenesh-gene-0.17-mRNA-1	315.529	296.583	92.8596	265.547	188.422	275.46	Enolase
maker-pcu_contig_815-snap-gene-0.3-mRNA-1	312.837	738.44	242.335	767.7	630.826	1370.47	Mucin
maker-pcu_contig_48-snap-gene-0.17-mRNA-1	301.61	1526.28	1546.94	2168.54	1437.69	1318.76	Pyrophosphate-energized vacuolar membrane proton pump
maker-pcu_contig_342-snap-gene-0.12-mRNA-1	293.518	323.325	245.615	305.615	203.237	339.93	Transmembrane protein
maker-pcu_contig_410-snap-gene-0.9-mRNA-1	258.253	265.955	269.701	244.043	310.24	297.501	HECT E3 ubiquitin ligase
maker-pcu_contig_2-snap-gene-0.48-mRNA-1	240.618	286.626	229.537	413.278	268.981	336.875	Dolichyl-diphosphooligosaccharide-protein glycosyltransferase subunit STT3A
maker-pcu_contig_30-fgenesh-gene-0.5-mRNA-1	184.389	883.74	622.798	1079.46	936.372	1086.79	Phosphoglucomutase
maker-pcu_contig_187-snap-gene-0.8-mRNA-1	167.091	200.995	258.244	361.595	327.999	333.922	Callose synthase
maker-pcu_contig_481-snap-gene-0.8-mRNA-1	166.043	178.651	106.71	167.193	136.303	68.3558	Carbohydrate-binding protein
maker-pcu_contig_773-fgenesh-gene-0.1-mRNA-1	160.436	165.221	209.434	283.011	126.882	83.7045	ATP-citrate synthase
maker-pcu_contig_69-fgenesh-gene-0.1-mRNA-1	153.403	105.198	149.302	266.12	158.295	149.592	Carbamoyl-phosphate synthase [ammonia]
maker-pcu_contig_225-snap-gene-0.8-mRNA-1	152.35	113.987	146.326	83.6319	125.964	148.057	Conserved gene of unknown function
maker-pcu_contig_69-snap-gene-0.12-mRNA-1	134.552	82.725	145.92	158.17	91.5945	105.011	ATP-binding Cassette (ABC) Superfamily
maker-pcu_contig_184-snap-gene-0.7-mRNA-1	128.356	131.348	39.0445	54.5944	54.1658	32.7786	GTP-binding protein engA
maker-pcu_contig_364-snap-gene-0.11-mRNA-1	120.017	0	62.6682	0	50.4617	26.9427	Phospholipid-transporting ATPase
maker-pcu_contig_1025-snap-gene-0.1-mRNA-1	114.245	63.2158	68.8319	90.0402	142.961	102.081	Inositol-3,4-bisphosphate 4-phosphatase
maker-pcu_contig_1248-snap-gene-0.0-mRNA-1	108.957	318.178	164.116	221.603	87.2604	128.606	Zinc finger protein 2
maker-pcu_contig_14-snap-gene-0.15-mRNA-1	91.0932	128.347	272.891	277.755	192.263	227.161	Acetyl-CoA carboxylase
maker-pcu_contig_4-snap-gene-0.32-mRNA-1	71.5541	70.0412	157.317	138.941	141.755	144.733	Dynein heavy chain
maker-pcu_contig_5317-snap-gene-0.1-mRNA-1	0	9086.87	4364.37	11253	6573.75	5988.43	Carboxyl-ester lipase
maker-pcu_contig_7163-snap-gene-0.1-mRNA-1	0	2267.32	1018.36	4719.54	3507.2	4773.95	NAD-specific glutamate dehydrogenase
maker-pcu_contig_3878-fgenesh-gene-0.1-mRNA-1	0	5235.57	6222.69	4679.1	4046.75	5100.62	60S ribosomal protein L37a
maker-pcu_contig_637-fgenesh-gene-0.1-mRNA-1	0	1541.9	1207.78	4589.98	6336.63	3550.25	Heat shock protein 90
maker-pcu_contig_180-snap-gene-0.12-mRNA-1	0	4058.2	6663.17	4517.11	3552.14	3974.66	40S ribosomal protein S3a
maker-pcu_contig_450-snap-gene-0.11-mRNA-1	0	5096.05	1930.01	4338.03	3114.64	2709.42	Fructokinase
maker-pcu_contig_373-fgenesh-gene-0.3-mRNA-1	0	4066.67	4193	3871.36	2720.71	3227.6	RS26, ribosomal protein 26 40S small ribosomal subunit
maker-pcu_contig_716-fgenesh-gene-0.0-mRNA-1	0	4241.05	4524.92	3855.4	2696.83	2627.8	Ribosomal protein L34
maker-pcu_contig_100-fgenesh-gene-0.0-mRNA-1	0	3822.34	4442.17	3808.17	2039.14	2981.3	40S ribosomal protein S14
maker-pcu_contig_135-snap-gene-0.15-mRNA-1	0	4966.61	5815.18	3771.56	2786.66	3048.5	60S ribosomal protein L32-1
maker-pcu_contig_2574-snap-gene-0.4-mRNA-1	0	4460.12	4558.85	3467.81	1928.79	2096.23	Ribosomal protein S8
maker-pcu_contig_381-fgenesh-gene-0.3-mRNA-1	0	4287.98	3976.12	3445.93	2540.53	2939.63	60S ribosomal protein L36
maker-pcu_contig_197-fgenesh-gene-0.2-mRNA-1	0	4067.79	4396.6	3433.38	2970.8	2799.58	60S ribosomal protein L17-2
maker-pcu_contig_215-fgenesh-gene-0.2-mRNA-1	0	4247.59	4144.28	3240.67	2609.43	2592.3	40S ribosomal protein S15
maker-pcu_contig_515-snap-gene-0.10-mRNA-1	0	3362.22	3572.73	3174.95	2803.04	2933.48	40S ribosomal protein RPS20
maker-pcu_contig_26393-snap-gene-0.1-mRNA-1	0	1205.02	1987.56	3129.99	2217.17	2506.53	Gene of unknown function
maker-pcu_contig_726-fgenesh-gene-0.2-mRNA-1	0	3749.82	4033.46	3115.77	2491.61	2688.13	40S ribosomal protein S18
maker-pcu_contig_406-fgenesh-gene-0.0-mRNA-1	0	3906.35	5104.06	3087.45	2528.32	2460.73	60S ribosomal protein L31
maker-pcu_contig_3167-fgenesh-gene-0.0-mRNA-1	0	4276.11	2086.36	3042.92	2388.45	3588.54	Small cysteine rich protein SCR108
maker-pcu_contig_193-fgenesh-gene-0.1-mRNA-1	0	3610.54	3373.06	3033.61	1893.01	2605.77	60S ribosomal protein L8
maker-pcu_contig_432-fgenesh-gene-0.4-mRNA-1	0	3420.87	4685.14	3005.51	2729.11	2969.78	60S ribosomal protein L13
maker-pcu_contig_3749-snap-gene-0.2-mRNA-1	0	2444.5	3740.95	2968.66	1384.15	1703	Ribosomal protein S8
maker-pcu_contig_412-fgenesh-gene-0.1-mRNA-1	0	3082.81	3333.54	2941.34	2388.65	1966.38	40S ribosomal protein S25
maker-pcu_contig_1119-snap-gene-0.4-mRNA-1	0	6753.2	1288.93	2924.65	1045.91	3368.26	Conserved gene of unknown function
maker-pcu_contig_2352-fgenesh-gene-0.0-mRNA-1	0	2175.79	1546.66	2912.01	2562.53	2891.54	14-3-3 protein epsilon
maker-pcu_contig_1552-snap-gene-0.3-mRNA-1	0	3176.1	4106.69	2871.9	2693.5	3192	Ribosomal protein L37
maker-pcu_contig_1067-snap-gene-0.5-mRNA-1	0	3835.55	2118.19	2807.03	2285.86	3457.91	Cyclophilin A
maker-pcu_contig_82-fgenesh-gene-0.1-mRNA-1	0	2975.26	3987.17	2806.59	1527.88	1833.23	60S ribosomal protein L24
maker-pcu_contig_535-snap-gene-0.8-mRNA-1	0	3630.34	4641.2	2770.9	2364.45	2540.42	40S ribosomal protein S5-2
maker-pcu_contig_202-fgenesh-gene-0.0-mRNA-1	0	3622.65	4792.54	2733.83	2477.42	2504.23	RL38, ribosomal protein 38 60S large ribosomal subunit
maker-pcu_contig_1105-snap-gene-0.5-mRNA-1	0	3973.99	3008.32	2703.84	2197.98	2301.44	60S ribosomal protein L8
maker-pcu_contig_130-fgenesh-gene-0.3-mRNA-1	0	3026.47	2441.42	2696.68	2005.43	1897.6	60S ribosomal protein L30
maker-pcu_contig_37-snap-gene-0.27-mRNA-1	0	3201.96	3569.32	2691.98	2304.21	1883.55	40S ribosomal protein S15a
maker-pcu_contig_11148-fgenesh-gene-0.0-mRNA-1	0	3291.17	3931.67	2680.77	1751.59	2197.76	40S ribosomal protein S11
maker-pcu_contig_166-fgenesh-gene-0.5-mRNA-1	0	3791.2	1754.41	2654.48	1228.18	1711.42	Glutamine synthetase
maker-pcu_contig_1221-fgenesh-gene-0.3-mRNA-1	0	3485.72	4952.07	2651.81	3117.1	3895.51	60S ribosomal protein L10
maker-pcu_contig_209-fgenesh-gene-0.4-mRNA-1	0	2631.46	2936.35	2640.2	1876.51	1599.99	60S ribosomal protein L23a
maker-pcu_contig_1783-snap-gene-0.7-mRNA-1	0	3193.71	3977.7	2614.4	1775.97	1964.49	40S ribosomal protein S19-3
maker-pcu_contig_525-snap-gene-0.6-mRNA-1	0	4547.08	1265.75	2606.9	862.708	1461.93	ATP-binding Cassette (ABC) Superfamily
maker-pcu_contig_740-fgenesh-gene-0.3-mRNA-1	0	2560.99	3346.21	2584.59	1587.02	1565.62	60S acidic ribosomal protein P1
maker-pcu_contig_355-fgenesh-gene-0.4-mRNA-1	0	3156.19	3303.81	2564.54	2090.68	2324.88	60S ribosomal protein L21-1
maker-pcu_contig_31069-snap-gene-0.0-mRNA-1	0	8858.01	2669.09	2515.44	646.451	3036.35	Conserved gene of unknown function
maker-pcu_contig_375-snap-gene-0.3-mRNA-1	0	2860.83	3563.54	2504.49	2322.87	2413.16	40S ribosomal protein S13
maker-pcu_contig_5-snap-gene-0.25-mRNA-1	0	2707.87	2179.11	2472.95	1471.65	1702.33	Eukaryotic translation initiation factor 5A-1/2
maker-pcu_contig_185-fgenesh-gene-0.5-mRNA-1	0	3428.51	3484.22	2456.64	2205.43	2029.75	40S ribosomal protein S24
maker-pcu_contig_19404-fgenesh-gene-0.0-mRNA-1	0	618.898	758.739	2442.82	669.053	722.773	Aldose 1-epimerase
maker-pcu_contig_5925-snap-gene-0.0-mRNA-1	0	1868.04	636.729	2409.6	815.723	702.907	Protease inhibitor Epi7
maker-pcu_contig_468-fgenesh-gene-0.0-mRNA-1	0	2497.5	3224.18	2357.59	2405.86	2059.33	40S ribosomal protein S7
maker-pcu_contig_1329-fgenesh-gene-0.3-mRNA-1	0	2343.4	3812.66	2349.15	2399.11	2602.88	60S ribosomal protein L12
maker-pcu_contig_886-snap-gene-0.4-mRNA-1	0	2969.19	3539.75	2338.88	1820.92	1853.89	40S ribosomal protein S17
maker-pcu_contig_90-fgenesh-gene-0.4-mRNA-1	0	3086.93	3773.18	2331.06	2282.92	2285.26	40S ribosomal protein S10
maker-pcu_contig_83-fgenesh-gene-0.2-mRNA-1	0	1617.54	1444.22	2328.4	1954.85	1906.86	ADP/ATP translocase
maker-pcu_contig_2-fgenesh-gene-0.5-mRNA-1	0	2238.13	3240.51	2260.27	1694.09	2195.76	40S ribosomal protein S29
maker-pcu_contig_909-snap-gene-0.6-mRNA-1	0	1820.53	3001.71	2183.69	1962.08	1963.31	60S ribosomal protein L14
maker-pcu_contig_1087-fgenesh-gene-0.1-mRNA-1	0	3268.84	3194.64	2124.3	2007.85	2265.94	60S ribosomal protein L35a-4
maker-pcu_contig_59-fgenesh-gene-0.4-mRNA-1	0	2973.72	3295.28	2107.62	1994.02	2254.46	60S ribosomal protein P1
maker-pcu_contig_123-fgenesh-gene-0.6-mRNA-1	0	2155.76	4563.11	1956.18	2302.65	1918.46	Ribosomal protein L29
maker-pcu_contig_31973-snap-gene-0.0-mRNA-1	0	0	0	1917.96	638.014	744.851	Aldose 1-epimerase
maker-pcu_contig_12653-snap-gene-0.0-mRNA-1	0	1873.07	1044.78	1846.97	306.768	214.03	Glucanase inhibitor protein 1
maker-pcu_contig_5793-fgenesh-gene-0.0-mRNA-1	0	1847.62	895.557	1819.25	0	202.651	Pc13g13950 protein
maker-pcu_contig_14399-fgenesh-gene-0.0-mRNA-1	0	544.098	0	1785.85	963.169	979.255	Luminal-binding protein 3
maker-pcu_contig_525-fgenesh-gene-0.3-mRNA-1	0	1647.58	525.227	1725.82	730.312	571.594	Glu/Leu/Phe/Val dehydrogenase family
maker-pcu_contig_32-fgenesh-gene-0.12-mRNA-1	0	2378.52	2673.78	1715.78	1263.56	1190.58	Ribosomal protein
maker-pcu_contig_8453-snap-gene-0.0-mRNA-1	0	1451.5	2965.52	1710.27	2330.83	2245.36	Crinkler (CRN) family protein
maker-pcu_contig_945-fgenesh-gene-0.2-mRNA-1	0	1133.88	1827.21	1695.15	1032.58	1246.16	60S acidic ribosomal protein P0
maker-pcu_contig_2013-fgenesh-gene-0.0-mRNA-1	0	2462.38	1619.54	1681.48	685.021	126.786	Phosphoenolpyruvate carboxykinase
maker-pcu_contig_610-fgenesh-gene-0.1-mRNA-1	0	2928.57	1168.01	1672.85	907.261	814.651	Methylmalonate-semialdehyde dehydrogenase, mitochondrial
maker-pcu_contig_223-fgenesh-gene-0.0-mRNA-1	0	1378.63	954.92	1661.93	1633.54	1755.33	Receptor expression-enhancing protein 6
maker-pcu_contig_7431-fgenesh-gene-0.0-mRNA-1	0	1699.17	723.604	1648.82	1450.98	1179.76	Glutathione transferase, theta class
maker-pcu_contig_1285-snap-gene-0.3-mRNA-1	0	1588.4	2563.37	1643.1	1144.8	1227.9	40S ribosomal protein S4
maker-pcu_contig_11110-snap-gene-0.1-mRNA-1	0	2196.06	1555.39	1621.53	379.407	665.547	Conserved gene of unknown function
maker-pcu_contig_852-fgenesh-gene-0.0-mRNA-1	0	3161.21	1959.32	1586.52	343.152	912.576	Glutamine synthetase
maker-pcu_contig_800-fgenesh-gene-0.3-mRNA-1	0	3047.73	2541.82	1584.3	1435.96	1929.92	Ribosomal protein L39
maker-pcu_contig_94-fgenesh-gene-0.3-mRNA-1	0	2661.73	1488.46	1579.13	1091.52	1060.71	Enoyl-CoA hydratase, mitochondrial
maker-pcu_contig_8396-snap-gene-0.1-mRNA-1	0	3410.38	1266.16	1567.68	1631.9	1326.43	Amino Acid/Auxin Permease (AAAP) Family
maker-pcu_contig_28186-fgenesh-gene-0.0-mRNA-1	0	677.369	465.656	1550.29	394.434	1521.31	Aldose 1-epimerase
maker-pcu_contig_3659-snap-gene-0.0-mRNA-1	0	530.07	321.311	1544.47	570.936	226.737	Glucanase inhibitor protein 1
maker-pcu_contig_2009-fgenesh-gene-0.0-mRNA-1	0	1827.67	878.116	1518.18	1270.44	2639.67	Triosephosphate isomerase/glyceraldehyde-3-phosphate dehydrogenase
maker-pcu_contig_25830-snap-gene-0.0-mRNA-1	0	1703.18	342.379	1507.59	711.066	524.568	Conserved gene of unknown function
maker-pcu_contig_10401-snap-gene-0.1-mRNA-1	0	687.501	2474.19	1501.83	1663.92	3427.94	Annexin (Annexin) Family
maker-pcu_contig_1750-snap-gene-0.3-mRNA-1	0	1658.84	2561.53	1493.67	2013.48	1931.27	Ribosomal protein S27
maker-pcu_contig_24054-snap-gene-0.0-mRNA-1	0	1664.95	2747.92	1491.32	741.95	401.488	Gene of unknown function
maker-pcu_contig_2977-fgenesh-gene-0.0-mRNA-1	0	1220.97	1974.55	1452.81	1329.72	1128.25	60S ribosomal protein L27
maker-pcu_contig_5380-snap-gene-0.1-mRNA-1	0	1023.91	405.426	1446.38	607.62	465.608	Calcineurin-like phosphoesterase
maker-pcu_contig_7269-fgenesh-gene-0.0-mRNA-1	0	3384.08	1073.83	1414.68	1784.24	3913.35	Tyrosyl-tRNA synthetase, cytoplasmic
maker-pcu_contig_1292-fgenesh-gene-0.2-mRNA-1	0	2222.96	1027.21	1403.23	865.162	548.58	Conserved gene of unknown function
maker-pcu_contig_21513-fgenesh-gene-0.0-mRNA-1	0	530.961	580.485	1396.65	1446.77	840.877	Heat shock protein 70
maker-pcu_contig_14531-snap-gene-0.1-mRNA-1	0	851.782	3051.62	1387.16	1834.32	1598.51	Conserved gene of unknown function
maker-pcu_contig_1515-fgenesh-gene-0.0-mRNA-1	0	1002.47	673.628	1329.42	345.11	412.027	Peroxiredoxin-2
maker-pcu_contig_1873-snap-gene-0.4-mRNA-1	0	1219.29	673.152	1311.08	1090.52	1347.82	Annexin (Annexin) Family
maker-pcu_contig_4468-snap-gene-0.2-mRNA-1	0	2103.9	290.572	1300.07	537.999	124.083	Phosphoenolpyruvate carboxykinase
maker-pcu_contig_112-fgenesh-gene-0.7-mRNA-1	0	1040.27	1255.73	1280.44	1083.37	999.353	Protein disulfide-isomerase
maker-pcu_contig_98-snap-gene-0.10-mRNA-1	0	1222.74	1095.1	1246.28	702.904	722.749	Calcineurin-like phosphoesterase
maker-pcu_contig_4634-fgenesh-gene-0.0-mRNA-1	0	1099.07	1077.04	1243.76	1201.57	1165.51	Ubiquitin carrier protein
maker-pcu_contig_91-fgenesh-gene-0.0-mRNA-1	0	282.075	118.218	1233.73	1206.29	413.58	Inositol-3-phosphate synthase
maker-pcu_contig_424-snap-gene-0.7-mRNA-1	0	1417.08	814.687	1221.44	1079.85	1938.53	Protoplast secreted protein 2
maker-pcu_contig_74-snap-gene-0.10-mRNA-1	0	1447.14	781.844	1218.42	710.35	872.78	Long-chain-fatty-acid-CoA ligase
maker-pcu_contig_13053-snap-gene-0.1-mRNA-1	0	447.058	402.187	1208	596.661	705.485	Glycoside hydrolase
maker-pcu_contig_1352-fgenesh-gene-0.0-mRNA-1	0	827.493	614.323	1201.06	636.94	685.615	Conserved gene of unknown function
maker-pcu_contig_411-snap-gene-0.9-mRNA-1	0	1831.1	733.709	1187.48	1606.04	1762.7	Small cysteine rich protein SCR122
maker-pcu_contig_13074-snap-gene-0.0-mRNA-1	0	1270.56	737.83	1186.96	536.336	429.447	Viral protein TPX
maker-pcu_contig_943-fgenesh-gene-0.0-mRNA-1	0	736.347	784.091	1180.65	676.674	565.827	Heat shock cognate 70 kDa protein
maker-pcu_contig_231-fgenesh-gene-0.3-mRNA-1	0	2249.42	2939.11	1137.91	1313.5	1514.57	40S ribosomal protein S21
maker-pcu_contig_4547-fgenesh-gene-0.0-mRNA-1	0	545.393	0	1128.94	367.466	111.095	Scc2-2A
maker-pcu_contig_4191-snap-gene-0.0-mRNA-1	0	964.59	0	1119.41	374.918	312.352	C protein immunoglobulin-A-binding beta antigen
maker-pcu_contig_28060-fgenesh-gene-0.0-mRNA-1	0	250.046	0	1113.07	339.284	569.272	Glycoside hydrolase
maker-pcu_contig_10893-snap-gene-0.0-mRNA-1	0	608.542	634.3	1108.84	316.219	364.876	Calcineurin-like phosphoesterase
maker-pcu_contig_975-snap-gene-0.3-mRNA-1	0	1258.31	1099.44	1076.22	1412.83	2251.03	Conserved gene of unknown function
maker-pcu_contig_123-fgenesh-gene-0.1-mRNA-1	0	821.976	871.948	1076.16	563.361	344.178	Adenosylhomocysteinase
maker-pcu_contig_16336-snap-gene-0.1-mRNA-1	0	931.213	501.075	1052.16	504.861	723.519	Beta-glucosidase
maker-pcu_contig_4129-fgenesh-gene-0.0-mRNA-1	0	896.246	587.942	1019.14	748.355	186.152	Ammonium Transporter (Amt) Family
maker-pcu_contig_80-fgenesh-gene-0.6-mRNA-1	0	548.958	583.428	1008.43	809.167	592.907	Elongation factor 3
maker-pcu_contig_509-snap-gene-0.9-mRNA-1	0	955.127	337.291	1004.97	0	141.719	Gene of unknown function
maker-pcu_contig_11319-snap-gene-0.1-mRNA-1	0	1134.14	306.971	1003.83	150.162	255.506	Proline-rich beta protein
maker-pcu_contig_8653-snap-gene-0.1-mRNA-1	0	1013.92	455.064	996.322	699.107	195.114	Ammonium Transporter (Amt) Family
maker-pcu_contig_1415-fgenesh-gene-0.1-mRNA-1	0	1220.49	537.347	980.761	760.351	1342.99	Superoxide dismutase
maker-pcu_contig_6825-snap-gene-0.1-mRNA-1	0	470.006	624.18	972.243	848.094	590.431	S-adenosylmethionine synthase
maker-pcu_contig_1-fgenesh-gene-0.5-mRNA-1	0	1256.94	1010.67	962.309	1290.95	1563.48	Histone H1
maker-pcu_contig_408-snap-gene-0.2-mRNA-1	0	1097.35	1289.2	958.208	711.567	713.292	60S ribosomal protein L35
maker-pcu_contig_348-snap-gene-0.6-mRNA-1	0	549.072	421.485	956.542	482.777	1230.75	Glucan 1,3-beta-glucosidase
maker-pcu_contig_424-fgenesh-gene-0.1-mRNA-1	0	2043.03	1258.76	941.196	659.907	727.002	Endoribonuclease L-PSP
maker-pcu_contig_8239-snap-gene-0.2-mRNA-1	0	1115.57	0	940.366	0	70.263	NPP1
maker-pcu_contig_808-fgenesh-gene-0.3-mRNA-1	0	911.64	608.525	923.405	484.039	744.3	Voltage-dependent anion-selective channel protein
maker-pcu_contig_13-snap-gene-0.37-mRNA-1	0	859.934	520.183	918.389	487.476	747.258	ADP-ribosylation factor family
maker-pcu_contig_2522-fgenesh-gene-0.1-mRNA-1	0	858.635	861.635	917.766	680.04	942.506	Cyclophilin B
maker-pcu_contig_552-fgenesh-gene-0.1-mRNA-1	0	504.522	242.54	916.83	573.495	532.169	Chaperonin CPN60-1, mitochondrial
maker-pcu_contig_503-snap-gene-0.6-mRNA-1	0	1482.36	700.568	906.678	1376.3	1050.26	Carbohydrate-binding protein
maker-pcu_contig_256-snap-gene-0.19-mRNA-1	0	1225.04	413.5	904.631	777.926	2071.9	Aquaporin
maker-pcu_contig_222-fgenesh-gene-0.6-mRNA-1	0	736.879	894.04	903.386	754.18	650.279	Cytochrome c
maker-pcu_contig_171-fgenesh-gene-0.7-mRNA-1	0	617.855	595.86	900.532	344.924	436.004	EF-1 guanine nucleotide exchange domain-containing protein
maker-pcu_contig_11014-fgenesh-gene-0.0-mRNA-1	0	845.056	331.261	887.458	405.513	179.397	Carbohydrate-binding protein
maker-pcu_contig_6167-snap-gene-0.2-mRNA-1	0	850.406	480.496	873.161	394.198	606.863	Thioredoxin
maker-pcu_contig_21749-snap-gene-0.1-mRNA-1	0	348.781	0	872.95	195.349	472.364	Glucose transporter
maker-pcu_contig_326-fgenesh-gene-0.2-mRNA-1	0	1753.41	582.803	871.145	1452.55	1232.9	Conserved gene of unknown function
maker-pcu_contig_2452-fgenesh-gene-0.0-mRNA-1	0	618.028	372.701	863.854	464.451	614.243	Conserved gene of unknown function
maker-pcu_contig_333-snap-gene-0.13-mRNA-1	0	1217.88	1043.18	862.507	837.278	947.734	Ras-like GTP-binding protein YPT1
maker-pcu_contig_86-fgenesh-gene-0.7-mRNA-1	0	741.784	748.943	860.901	439.206	538.815	ATP-dependent RNA helicase eIF4A
maker-pcu_contig_3197-fgenesh-gene-0.1-mRNA-1	0	593.95	0	860.835	961.403	1401.39	Annexin (Annexin) Family
maker-pcu_contig_21249-snap-gene-0.0-mRNA-1	0	204.033	0	852.808	0	310.007	Calcineurin-like phosphoesterase
maker-pcu_contig_8393-snap-gene-0.1-mRNA-1	0	0	0	846.655	0	393.591	Major Facilitator Superfamily (MFS)
maker-pcu_contig_18846-snap-gene-0.0-mRNA-1	0	964.681	430.401	839.272	199.217	42.2688	Necrosis-inducing
maker-pcu_contig_4388-fgenesh-gene-0.0-mRNA-1	0	948.332	376.753	834.217	801.279	664.481	Notch
maker-pcu_contig_23927-snap-gene-0.0-mRNA-1	0	652.05	0	831.458	661.491	705.586	Beta-glucosidase
maker-pcu_contig_1459-fgenesh-gene-0.0-mRNA-1	0	672.67	659.187	815.618	711.933	644.095	Unactive progesterone receptor, 23 kD
maker-pcu_contig_249-snap-gene-0.6-mRNA-1	0	886.849	680.672	810.502	844.196	421.604	Conserved gene of unknown function
maker-pcu_contig_14143-snap-gene-0.1-mRNA-1	0	894.561	1138.28	809.765	162.127	194.791	Conserved gene of unknown function
maker-pcu_contig_2055-fgenesh-gene-0.2-mRNA-1	0	555.404	420.692	806.921	487.558	527.942	Mitochondrial Carrier (MC) Family
maker-pcu_contig_3962-fgenesh-gene-0.1-mRNA-1	0	843.365	1530.48	798.295	1098.57	1460.05	Ubiquitin/ribosomal protein
maker-pcu_contig_3062-fgenesh-gene-0.0-mRNA-1	0	761.396	218.891	780.174	85.3577	67.1098	Whole genome shotgun sequence assembly, scaffold_94
maker-pcu_contig_4246-snap-gene-0.0-mRNA-1	0	316.099	0	773.969	1176.44	892.697	Elicitin SOL11B
maker-pcu_contig_1423-fgenesh-gene-0.2-mRNA-1	0	574.494	334.318	772.921	534.529	370.24	Phosphoenolpyruvate carboxykinase
maker-pcu_contig_379-fgenesh-gene-0.4-mRNA-1	0	760.435	382.716	770.365	814.451	810.929	6-phosphogluconate dehydrogenase, decarboxylating
maker-pcu_contig_221-fgenesh-gene-0.5-mRNA-1	0	994.874	1374.9	765.405	548.278	663.166	Ser/thr kinase
maker-pcu_contig_27-snap-gene-0.29-mRNA-1	0	718.625	207.124	764.352	172.075	72.8705	Glucanase inhibitor protein 1
maker-pcu_contig_19737-snap-gene-0.1-mRNA-1	0	484.62	502.679	761.863	380.7	314.243	Transglutaminase elicitor
maker-pcu_contig_4466-snap-gene-0.1-mRNA-1	0	735.912	650.018	749.634	560.33	623.843	Glyceraldehyde-3-phosphate dehydrogenase
maker-pcu_contig_5328-fgenesh-gene-0.0-mRNA-1	0	584.133	445.934	744.377	696.776	642.063	Argininosuccinate synthase
maker-pcu_contig_945-snap-gene-0.5-mRNA-1	0	674.679	862.132	739.453	781.333	741.356	Gene of unknown function
maker-pcu_contig_23643-fgenesh-gene-0.0-mRNA-1	0	656.775	633.746	738.705	848.954	960.048	Nucleoside diphosphate kinase
maker-pcu_contig_3197-snap-gene-0.3-mRNA-1	0	553.302	459.235	733.543	594.295	799.328	Annexin (Annexin) Family
maker-pcu_contig_171-snap-gene-0.8-mRNA-1	0	906.385	419.577	731.918	620.692	761.851	Phospholipase D, Pi-PLD-like-1
maker-pcu_contig_246-snap-gene-0.9-mRNA-1	0	771.027	645.789	727.506	656.688	723.841	Nucleoredoxin
maker-pcu_contig_441-fgenesh-gene-0.1-mRNA-1	0	753.315	0	726.633	686.892	505.801	10 kDa chaperonin
maker-pcu_contig_720-fgenesh-gene-0.0-mRNA-1	0	312.017	252.587	725.318	669.295	532.066	Heat shock protein belonging to the HSP70 family
maker-pcu_contig_834-snap-gene-0.3-mRNA-1	0	524.074	547.807	713.654	295.82	528.35	SCP-like extracellular protein
maker-pcu_contig_21051-snap-gene-0.1-mRNA-1	0	596.238	424.775	713.506	551.714	789.179	Annexin (Annexin) Family
maker-pcu_contig_20448-snap-gene-0.0-mRNA-1	0	0	741.777	696.199	513.546	242.017	Gene of unknown function
maker-pcu_contig_11966-fgenesh-gene-0.0-mRNA-1	0	902.382	0	690.888	0	176.298	Conserved gene of unknown function
maker-pcu_contig_7754-snap-gene-0.1-mRNA-1	0	594.685	716.982	690.553	632.89	619.468	Proly 4-hydroxylase
maker-pcu_contig_426-fgenesh-gene-0.1-mRNA-1	0	526.869	635.456	688.884	527.926	300.267	H-or Na-translocating F-type, V-type and A-type ATPase (F-ATPase) Superfamily
maker-pcu_contig_495-snap-gene-0.5-mRNA-1	0	903.768	553.533	680.578	367.892	665.691	Thioredoxin
maker-pcu_contig_4945-fgenesh-gene-0.0-mRNA-1	0	634.222	242.54	678.827	0	69.0125	ATP-binding Cassette (ABC) Superfamily
maker-pcu_contig_740-fgenesh-gene-0.2-mRNA-1	0	534.892	591.372	678.339	643.158	890.816	Conserved gene of unknown function
maker-pcu_contig_338-snap-gene-0.9-mRNA-1	0	843.974	551.372	664.454	332.101	435.579	FK506-binding protein 2
maker-pcu_contig_23405-snap-gene-0.0-mRNA-1	0	587.151	285.345	660.752	101.433	85.2661	Glucanase inhibitor protein 2
maker-pcu_contig_3-snap-gene-0.32-mRNA-1	0	542.053	459.66	660.177	675.689	973.147	Aconitate hydratase, mitochondrial
maker-pcu_contig_29519-snap-gene-0.0-mRNA-1	0	407.568	388.527	658.023	242.003	109.711	Glucanase inhibitor protein 1
maker-pcu_contig_163-fgenesh-gene-0.3-mRNA-1	0	587.16	636.204	657.405	382.42	480.011	Ran-specific GTPase-activating protein
maker-pcu_contig_96-snap-gene-0.3-mRNA-1	0	767.617	465.667	655.942	607.085	688.828	ATP synthase subunit 4, mitochondrial
maker-pcu_contig_6343-snap-gene-0.1-mRNA-1	0	413.929	540.843	652.555	675.69	633.263	Clathrin heavy chain
maker-pcu_contig_10966-fgenesh-gene-0.0-mRNA-1	0	487.689	0	646.871	371.664	392.731	Glutathione peroxidase
maker-pcu_contig_515-snap-gene-0.5-mRNA-1	0	1201.16	908.208	645.964	718.237	335.932	Gene of unknown function
maker-pcu_contig_183-fgenesh-gene-0.3-mRNA-1	0	656.113	478.358	641.752	559.547	486.301	DEAD/DEAH box RNA helicase
maker-pcu_contig_1079-fgenesh-gene-0.1-mRNA-1	0	744.28	410.266	641.551	416.584	316.021	Protein transporter Sec61 subunit alpha
maker-pcu_contig_2161-fgenesh-gene-0.0-mRNA-1	0	736.879	251.168	637.713	354.733	152.188	Phenol acid carboxylase
maker-pcu_contig_1072-snap-gene-0.8-mRNA-1	0	778.144	783.729	637.137	644.069	849.471	V-type proton ATPase 16 kDa proteolipid subunit
maker-pcu_contig_13842-snap-gene-0.0-mRNA-1	0	498.811	0	635.615	97.4632	87.8406	SCP-like extracellular protein
maker-pcu_contig_10-snap-gene-0.24-mRNA-1	0	581.161	279.76	632.081	328.708	356.54	Mucin
maker-pcu_contig_947-fgenesh-gene-0.1-mRNA-1	0	300.348	0	627.016	442.028	441.104	Glycoside hydrolase
maker-pcu_contig_550-fgenesh-gene-0.0-mRNA-1	0	604.901	362.639	626.277	435.689	481.912	Proliferation-associated protein, metalloprotease family M24X
maker-pcu_contig_333-snap-gene-0.9-mRNA-1	0	677.826	553.533	622.657	533.444	661.607	IDI-7
maker-pcu_contig_22-fgenesh-gene-0.8-mRNA-1	0	663.056	350.435	621.602	1305.26	1420.69	C2 domain-containing protein
maker-pcu_contig_970-snap-gene-0.6-mRNA-1	0	821.353	173.444	620.665	507.933	331.047	Fructose 1,6 bisphosphatase
maker-pcu_contig_808-fgenesh-gene-0.1-mRNA-1	0	782.822	336.631	620.649	451.77	442.595	Voltage-dependent anion-selective channel protein
maker-pcu_contig_11607-snap-gene-0.0-mRNA-1	0	291.802	122.091	617.79	183.437	89.6715	Glucanase inhibitor protein 1
maker-pcu_contig_58-snap-gene-0.9-mRNA-1	0	691.142	517.926	614.798	589.158	539.857	Glycoside hydrolase
maker-pcu_contig_97-fgenesh-gene-0.1-mRNA-1	0	855.372	500.275	613.548	366.099	626.696	Cytochrome c peroxidase, mitochondrial
maker-pcu_contig_2902-fgenesh-gene-0.0-mRNA-1	0	618.846	475.641	612.227	426.766	666.263	ATP synthase subunit O
maker-pcu_contig_1123-fgenesh-gene-0.0-mRNA-1	0	279.025	291.661	611.884	245.336	298.994	Protein disulfide-isomerase
maker-pcu_contig_407-fgenesh-gene-0.3-mRNA-1	0	730.998	422.623	608.64	467.676	626.322	Isocitrate dehydrogenase, mitochondrial
maker-pcu_contig_47-fgenesh-gene-0.7-mRNA-1	0	619.617	587.001	600.836	465.092	523.911	3-ketodihydrosphingosine reductase
maker-pcu_contig_153-fgenesh-gene-0.0-mRNA-1	0	253.122	120.266	599.608	509.566	440.514	Peptidyl-prolyl cis-trans isomerase
maker-pcu_contig_2055-fgenesh-gene-0.1-mRNA-1	0	395.399	421.462	598.846	413.395	581.422	Cytochrome c1, mitochondrial
maker-pcu_contig_3260-fgenesh-gene-0.0-mRNA-1	0	599.363	503.442	595.268	199.831	311.206	Branched-chain-amino-acid aminotransferase
maker-pcu_contig_2435-fgenesh-gene-0.0-mRNA-1	0	178.277	155.292	592.238	247.707	225.835	Serine hydroxymethyltransferase
maker-pcu_contig_1-snap-gene-0.51-mRNA-1	0	617.695	354.129	589.78	385.887	471.011	Aspartate aminotransferase
maker-pcu_contig_617-fgenesh-gene-0.1-mRNA-1	0	1066.54	641.03	589.048	805.781	1006.03	Histone H3
maker-pcu_contig_256-fgenesh-gene-0.3-mRNA-1	0	970.615	310.308	583.734	605.265	1508.4	Aquaporin
maker-pcu_contig_2364-snap-gene-0.2-mRNA-1	0	442.282	155.586	580.069	116.332	361.386	Endonuclease/exonuclease/phosphatase
maker-pcu_contig_18111-snap-gene-0.1-mRNA-1	0	530.177	310.504	577.654	283.411	275.034	Transglutaminase elicitor
maker-pcu_contig_60-fgenesh-gene-0.2-mRNA-1	0	614.913	657.368	575.285	378.65	385.547	Electron transfer flavoprotein subunit beta
maker-pcu_contig_302-snap-gene-0.7-mRNA-1	0	673.975	375.732	571.806	409.698	547.028	ATP synthase gamma chain
maker-pcu_contig_174-snap-gene-0.8-mRNA-1	0	511.738	338.448	568.672	448.511	646.075	Succinyl-CoA ligase beta-chain, mitochondrial
maker-pcu_contig_11-fgenesh-gene-0.3-mRNA-1	0	226.23	259.546	563.846	355.784	216.781	Phosphoethanolamine N-methyltransferase
maker-pcu_contig_2707-fgenesh-gene-0.0-mRNA-1	0	409.181	891.064	557.618	964.48	803.193	Conserved gene of unknown function
maker-pcu_contig_228-snap-gene-0.8-mRNA-1	0	634.495	497.421	556.934	526.893	409.762	Ornithine transcarbamylase
maker-pcu_contig_5579-snap-gene-0.1-mRNA-1	0	931.352	855.641	556.737	834.066	1350.37	AN1-type zinc finger protein 6
maker-pcu_contig_4859-fgenesh-gene-0.0-mRNA-1	0	539.041	408.73	555.218	442.039	582.315	Glutathione reductase
maker-pcu_contig_943-snap-gene-0.6-mRNA-1	0	205.259	15.268	552.52	129.326	317.641	NAD-specific glutamate dehydrogenase
maker-pcu_contig_17-fgenesh-gene-0.7-mRNA-1	0	449.454	303.755	552.004	151.413	48.9296	Arabinogalactan endo-1,4-beta-galactosidase
maker-pcu_contig_921-fgenesh-gene-0.4-mRNA-1	0	490.658	0	551.668	409.047	438.482	Multiprotein bridging factor type 1
maker-pcu_contig_2154-fgenesh-gene-0.1-mRNA-1	0	620.332	0	549.734	484.83	119.265	Conserved gene of unknown function
maker-pcu_contig_1811-snap-gene-0.3-mRNA-1	0	999.452	1028.24	546.399	201.623	268.803	Plasma membrane H+-ATPase
maker-pcu_contig_103-fgenesh-gene-0.10-mRNA-1	0	230.577	268.829	546.041	653.842	487.424	Heat shock protein 90
maker-pcu_contig_7414-snap-gene-0.1-mRNA-1	0	382.554	207.593	545.441	432.249	342.527	Prolyl 4-hydroxylase
maker-pcu_contig_2131-fgenesh-gene-0.2-mRNA-1	0	388.741	216.141	542.992	296.285	487.923	Malate dehydrogenase
maker-pcu_contig_326-snap-gene-0.14-mRNA-1	0	657.217	451.381	540.319	318.292	475.311	Electron transfer flavoprotein subunit alpha, mitochondrial
maker-pcu_contig_495-fgenesh-gene-0.2-mRNA-1	0	719.275	831.37	538.87	306.305	587.926	Conserved gene of unknown function
maker-pcu_contig_21106-snap-gene-0.0-mRNA-1	0	239.06	0	536.641	133.518	69.7762	SCP-like extracellular protein
maker-pcu_contig_7204-snap-gene-0.1-mRNA-1	0	500.973	348.547	535.626	251.936	93.012	Carbohydrate-binding protein
maker-pcu_contig_330-fgenesh-gene-0.4-mRNA-1	0	654.857	380.285	534.468	322.253	299.385	Gene of unknown function
maker-pcu_contig_354-fgenesh-gene-0.1-mRNA-1	0	862.305	0	533.505	280.812	658.296	Copper chaperone
maker-pcu_contig_20440-fgenesh-gene-0.0-mRNA-1	0	0	0	524.879	0	370.651	Glucose transporter
maker-pcu_contig_1116-fgenesh-gene-0.0-mRNA-1	0	689.111	427.689	517.342	561.026	717.181	Carbonic anhydrase
maker-pcu_contig_35271-snap-gene-0.1-mRNA-1	0	6209.39	2817.77	516.445	678.07	0	Alpha-tubulin
maker-pcu_contig_1050-fgenesh-gene-0.2-mRNA-1	0	397.108	1159.81	514.054	304.28	279.849	Ubiquinol cytochrome c reductase subunit QCR9
maker-pcu_contig_6495-snap-gene-0.1-mRNA-1	0	256.127	206.7	513.575	387.603	314.555	Aspartyl protease family A22B
maker-pcu_contig_1586-fgenesh-gene-0.1-mRNA-1	0	513.017	377.812	512.867	309.83	413.851	Prohibitin-2
maker-pcu_contig_304-fgenesh-gene-0.1-mRNA-1	0	343.461	0	511.848	402.655	659.486	Acyl-coenzyme A binding protein
maker-pcu_contig_1072-fgenesh-gene-0.0-mRNA-1	0	559.621	153.938	509.187	318.444	467.152	Citrate synthase
maker-pcu_contig_28354-snap-gene-0.0-mRNA-1	0	1928.94	723.937	503.563	481.147	112.435	Malate dehydrogenase
maker-pcu_contig_6982-fgenesh-gene-0.0-mRNA-1	0	725.881	1106.52	502.282	0	681.747	Conserved gene of unknown function
maker-pcu_contig_460-fgenesh-gene-0.1-mRNA-1	0	428.494	699.841	495.695	372.106	367.633	Cytochrome c oxidase polypeptide VIb
maker-pcu_contig_4647-snap-gene-0.2-mRNA-1	0	618.607	317.275	494.892	406.658	604.008	Subunit of proteaseome activator complex
maker-pcu_contig_102-fgenesh-gene-0.4-mRNA-1	0	547.68	500.922	491.246	303.201	324.601	FKBP-type peptidyl-prolyl cis-trans isomerase
maker-pcu_contig_29671-snap-gene-0.0-mRNA-1	0	702.805	569.991	490.196	127.865	255.122	Plasma membrane H+-ATPase
maker-pcu_contig_15441-snap-gene-0.0-mRNA-1	0	0	0	481.676	111.56	0	NPP1
maker-pcu_contig_999-snap-gene-0.7-mRNA-1	0	343.16	247.379	481.338	289.01	368.235	NADH dehydrogenase flavoprotein 1, mitochondrial
maker-pcu_contig_2066-fgenesh-gene-0.0-mRNA-1	0	226.347	311.733	479.058	199.217	167.574	Surface protein SdrI from Staphylococcus saprophyticus
maker-pcu_contig_1852-snap-gene-0.3-mRNA-1	0	461.616	230.015	479.022	366.898	562.269	Aconitate hydratase
maker-pcu_contig_1677-fgenesh-gene-0.1-mRNA-1	0	726.715	335.988	478.455	400.495	755.03	Endo-1,3;1,4-beta-glucanase
maker-pcu_contig_729-snap-gene-0.9-mRNA-1	0	855.186	923.063	478.19	314.818	539.467	Conserved gene of unknown function
maker-pcu_contig_2388-snap-gene-0.1-mRNA-1	0	306.555	170.808	477.336	469.789	216.824	Elongation of very long chain fatty acids protein
maker-pcu_contig_1946-snap-gene-0.4-mRNA-1	0	509.069	243.577	477.173	249.837	427.883	Propionyl coenzyme A carboxylase (Pi-PCC1)
maker-pcu_contig_9208-snap-gene-0.1-mRNA-1	0	602.279	1836.2	475.5	1046.04	967.754	YALI0E20647p
maker-pcu_contig_123-fgenesh-gene-0.3-mRNA-1	0	361.548	518.118	475.426	394.995	447.516	Conserved gene of unknown function
maker-pcu_contig_30463-snap-gene-0.0-mRNA-1	0	353.984	0	474.962	389.565	329.612	ATP-binding Cassette (ABC) Superfamily
maker-pcu_contig_801-fgenesh-gene-0.2-mRNA-1	0	352.982	236.229	474.68	280.364	261.584	Aminotransferase
maker-pcu_contig_213-snap-gene-0.7-mRNA-1	0	316.905	159.85	474.643	291.453	341.689	ATP-binding Cassette (ABC) Superfamily
maker-pcu_contig_123-snap-gene-0.7-mRNA-1	0	198.257	259.044	470.712	879.048	712.958	Exo-1,3-beta-glucanase
maker-pcu_contig_1536-fgenesh-gene-0.1-mRNA-1	0	215.127	321.242	469.099	380.307	300.989	Omega-3 fatty acid desaturase, endoplasmic reticulum
maker-pcu_contig_5133-snap-gene-0.0-mRNA-1	0	335.502	164.413	465.724	81.9386	27.1028	Glucanase inhibitor protein 1
maker-pcu_contig_958-snap-gene-0.5-mRNA-1	0	588.433	403.647	465.275	287.437	376.741	Ubiquinol-cytochrome c reductase iron-sulfur subunit
maker-pcu_contig_9208-snap-gene-0.2-mRNA-1	0	450.848	789.62	463.992	912.156	767.267	DUF1688 domain-containing protein
maker-pcu_contig_2337-snap-gene-0.2-mRNA-1	0	0	0	463.875	250.31	203.792	Carbohydrate-binding protein
maker-pcu_contig_726-fgenesh-gene-0.1-mRNA-1	0	340.495	259.521	462.287	375.77	486.216	Proteasome subunit beta type
maker-pcu_contig_3409-fgenesh-gene-0.0-mRNA-1	0	382.431	438.75	460.63	291.605	204.917	RRNA 2'-O-methyltransferase fibrillarin
maker-pcu_contig_91-snap-gene-0.18-mRNA-1	0	300.716	553.658	460.035	445.131	357.786	ARMET 1 precursor.
maker-pcu_contig_1367-fgenesh-gene-0.1-mRNA-1	0	574.418	364.845	458.741	327.355	445.393	Trans-2-enoyl-CoA reductase
maker-pcu_contig_9219-snap-gene-0.0-mRNA-1	0	394.148	212.333	457.334	0	43.3114	Glucanase inhibitor protein 2
maker-pcu_contig_312-fgenesh-gene-0.1-mRNA-1	0	308.67	266.185	455.193	414.138	425.87	Mitochondrial-processing peptidase subunit alpha
maker-pcu_contig_243-snap-gene-0.17-mRNA-1	0	536.573	303.835	454.234	419.395	506.269	Proteasome subunit beta
maker-pcu_contig_2463-snap-gene-0.2-mRNA-1	0	372.862	1005.92	454.21	486.174	539.418	Casein kinase II subunit beta
maker-pcu_contig_2002-snap-gene-0.3-mRNA-1	0	428.48	610.894	452.958	653.306	863.349	Nucleoside diphosphate kinase
maker-pcu_contig_23-fgenesh-gene-0.5-mRNA-1	0	311.757	321.587	452.284	352.663	248.034	Ubiquitin carboxyl-terminal hydrolase 19
maker-pcu_contig_204-snap-gene-0.17-mRNA-1	0	481.959	0	451.916	313.902	312.269	Conserved gene of unknown function
maker-pcu_contig_2738-fgenesh-gene-0.1-mRNA-1	0	224.709	240.262	450.862	333.503	238.511	Heat shock 70 kDa protein, mitochondrial
maker-pcu_contig_624-fgenesh-gene-0.1-mRNA-1	0	426.054	236.591	450.306	173.432	278.488	Protein kinase
maker-pcu_contig_22781-fgenesh-gene-0.0-mRNA-1	0	0	0	447.889	0	287.093	AP-4 complex subunit sigma
maker-pcu_contig_16-snap-gene-0.7-mRNA-1	0	453.383	284.805	441.356	369.113	555.365	Argonaute1 (AGO1)
maker-pcu_contig_3299-snap-gene-0.1-mRNA-1	0	945.856	802.095	440.618	187.671	1067.98	Catalase-peroxidase
maker-pcu_contig_2440-fgenesh-gene-0.0-mRNA-1	0	852.746	383.382	438.784	412.069	451.567	2-oxoisovalerate dehydrogenase alpha subunit, mitochondrial
maker-pcu_contig_1329-snap-gene-0.5-mRNA-1	0	270.982	500.829	438.164	651.089	555.807	EC1118_1E8_0232p
maker-pcu_contig_160-fgenesh-gene-0.2-mRNA-1	0	310.477	275.277	434.969	310.545	465.217	Proteasome subunit alpha type
maker-pcu_contig_3077-snap-gene-0.4-mRNA-1	0	511.399	0	432.198	199.846	280.729	Transcription termination factor Rho
maker-pcu_contig_83-snap-gene-0.23-mRNA-1	0	301.606	517.232	431.877	313.072	297.746	RNA binding protein
maker-pcu_contig_26679-snap-gene-0.0-mRNA-1	0	243.842	0	427.909	498.037	379.609	Prolyl 4-hydroxylase alpha subunit
maker-pcu_contig_3742-fgenesh-gene-0.0-mRNA-1	0	743.213	333.812	426.036	415.987	1171.54	Glutamate decarboxylase
maker-pcu_contig_4964-snap-gene-0.1-mRNA-1	0	375.421	445.934	425.574	255.627	325.788	OST3/OST6 family protein
maker-pcu_contig_3242-fgenesh-gene-0.0-mRNA-1	0	357.453	253.542	420.236	383.583	482.379	CDC48/ATPase
maker-pcu_contig_4534-snap-gene-0.1-mRNA-1	0	349.382	1871.67	419.272	887.461	817.685	Conserved gene of unknown function
maker-pcu_contig_536-snap-gene-0.9-mRNA-1	0	393.904	606.176	418.817	313.563	359.392	3-hydroxyisobutyrate dehydrogenase
maker-pcu_contig_219-snap-gene-0.13-mRNA-1	0	418.005	617.409	417.741	177.553	371.782	Protein kinase
maker-pcu_contig_336-snap-gene-0.10-mRNA-1	0	573.708	299.844	417.082	181.491	144.688	Heat shock protein 70kD
maker-pcu_contig_123-snap-gene-0.13-mRNA-1	0	151.258	360.394	416.678	173.85	65.146	Acyl-CoA desaturase
maker-pcu_contig_3747-fgenesh-gene-0.0-mRNA-1	0	331.544	201.661	412.696	320.181	210.659	Delta(5) fatty acid desaturase
maker-pcu_contig_68-snap-gene-0.12-mRNA-1	0	693.451	724.855	411.635	541.977	809.355	Conserved gene of unknown function
maker-pcu_contig_3378-fgenesh-gene-0.0-mRNA-1	0	593.728	0	409.921	336.258	436.344	Conserved gene of unknown function
maker-pcu_contig_11-fgenesh-gene-0.7-mRNA-1	0	464.884	451.672	406.991	388.181	589.35	Threonine protease family T01A
maker-pcu_contig_23-fgenesh-gene-0.3-mRNA-1	0	832.474	0	406.724	456.584	618.164	Type II (General) Secretory Pathway (IISP) Family
maker-pcu_contig_130-fgenesh-gene-0.1-mRNA-1	0	188.752	339.692	405.273	269.066	215.336	5-methlytetrahydropteroyltriglutamate-homocysteine methyltransferease
maker-pcu_contig_334-snap-gene-0.10-mRNA-1	0	289.754	223.274	404.439	275.818	406.162	Counting factor 60
maker-pcu_contig_231-snap-gene-0.27-mRNA-1	0	447.945	445.934	403.607	416.783	412.256	Acyl carrier protein
maker-pcu_contig_4-fgenesh-gene-0.3-mRNA-1	0	292.336	332.362	403.142	417.89	428.145	Ca2 :Cation Antiporter (CaCA) Family
maker-pcu_contig_101-snap-gene-0.16-mRNA-1	0	303.739	334.614	402.764	469.353	302.348	Protein kinase
maker-pcu_contig_370-fgenesh-gene-0.0-mRNA-1	0	350.343	0	398.239	414.873	410.304	S-phase kinase-associated protein 1A
maker-pcu_contig_20769-snap-gene-0.0-mRNA-1	0	1271.23	888.06	397.77	0	61.5212	Glutamine synthetase nodule isozyme
maker-pcu_contig_945-snap-gene-0.11-mRNA-1	0	418.177	336.943	393.517	344.99	524.934	Carbohydrate esterase
maker-pcu_contig_2083-snap-gene-0.2-mRNA-1	0	691.215	0	392.765	77.2641	291.052	Carbohydrate-binding protein
maker-pcu_contig_126-snap-gene-0.32-mRNA-1	0	331.913	388.03	392.51	489.241	538.414	Conserved gene of unknown function
maker-pcu_contig_2866-snap-gene-0.1-mRNA-1	0	349.382	195.614	391.382	217.794	270.245	Carbohydrate-binding protein
maker-pcu_contig_326-snap-gene-0.13-mRNA-1	0	369.559	0	391.059	208.603	291.743	Dolichyl-diphosphooligosaccharide-protein glycosyltransferase subunit
maker-pcu_contig_837-fgenesh-gene-0.1-mRNA-1	0	624.307	316.852	390.786	547.752	910.575	Cysteine protease family C01A
maker-pcu_contig_126-snap-gene-0.15-mRNA-1	0	0	0	390.681	0	191.376	UPF0197 transmembrane protein
maker-pcu_contig_2886-fgenesh-gene-0.0-mRNA-1	0	1038.16	1095.61	390.681	0	173.978	Small nuclear ribonucleoprotein F
maker-pcu_contig_10242-snap-gene-0.0-mRNA-1	0	263.275	573.328	389.727	428.674	546.143	Ubiquitin fusion degradaton protein
maker-pcu_contig_310-snap-gene-0.10-mRNA-1	0	351.884	201.655	389.268	293.515	355.04	Dolichyl-diphosphooligosaccharide-protein glycosyltransferase 48kD subunit
maker-pcu_contig_213-snap-gene-0.10-mRNA-1	0	0	583.567	389.136	433.548	293.997	Gene of unknown function
maker-pcu_contig_606-fgenesh-gene-0.2-mRNA-1	0	519.936	505.16	387.452	633.858	517.621	AmphiHMG1/2
maker-pcu_contig_1002-fgenesh-gene-0.0-mRNA-1	0	586.558	408.747	386.25	160.088	134.569	Major Facilitator Superfamily (MFS)
maker-pcu_contig_4977-fgenesh-gene-0.0-mRNA-1	0	188.87	0	385.54	287.028	22.6534	Elicitin
maker-pcu_contig_1783-fgenesh-gene-0.3-mRNA-1	0	137.384	172.327	385.54	171.8	133.163	Nucleolar protein NOP5
maker-pcu_contig_7204-snap-gene-0.0-mRNA-1	0	204.076	0	384.54	0	92.0538	Carbohydrate-binding protein
maker-pcu_contig_1208-snap-gene-0.4-mRNA-1	0	633.856	0	382.78	237.692	359.86	Glutaredoxin
maker-pcu_contig_657-snap-gene-0.6-mRNA-1	0	269.889	340.885	380.916	432.419	527.628	Carbamoyl-phosphate synthase [ammonia]
maker-pcu_contig_33647-snap-gene-0.0-mRNA-1	0	0	782.808	380.445	252.486	306.57	Conserved gene of unknown function
maker-pcu_contig_14562-snap-gene-0.1-mRNA-1	0	335.526	215.482	379.676	343.665	391.285	ATP-binding Cassette (ABC) Superfamily
maker-pcu_contig_1508-fgenesh-gene-0.3-mRNA-1	0	602.449	0	378.961	267.53	376.062	Conserved gene of unknown function
maker-pcu_contig_84-fgenesh-gene-0.3-mRNA-1	0	314.661	0	378.523	237.731	296.749	NADH ubiquinone oxidoreductase subunit
maker-pcu_contig_226-snap-gene-0.12-mRNA-1	0	628.642	497.811	378.266	279.162	480.081	Conserved gene of unknown function
maker-pcu_contig_596-snap-gene-0.9-mRNA-1	0	764.457	443.931	377.231	308.22	455.221	Conserved gene of unknown function
maker-pcu_contig_19357-snap-gene-0.1-mRNA-1	0	548.375	223.91	376.244	223.224	462.699	Conserved gene of unknown function
maker-pcu_contig_24526-snap-gene-0.1-mRNA-1	0	257.051	179.021	376.202	0	43.1597	6-phosphogluconolactonase
maker-pcu_contig_23868-snap-gene-0.0-mRNA-1	0	0	438.603	374.401	210.839	174.831	Gene of unknown function
maker-pcu_contig_3537-fgenesh-gene-0.0-mRNA-1	0	438.803	366.303	372.728	333.427	353.913	Proteasome subunit beta type
maker-pcu_contig_586-fgenesh-gene-0.2-mRNA-1	0	270.753	0	371.501	374.728	494.644	Conserved gene of unknown function
maker-pcu_contig_561-fgenesh-gene-0.2-mRNA-1	0	424.801	315.028	370.783	349.956	454.8	Precursor of carboxylase pyruvate carboxylase
maker-pcu_contig_647-fgenesh-gene-0.1-mRNA-1	0	424.988	625.966	369.568	397.58	442.43	Pyruvate dehydrogenase E1 component subunit beta
maker-pcu_contig_905-fgenesh-gene-0.1-mRNA-1	0	379.953	244.628	369.531	258.225	414.516	Transaldolase
maker-pcu_contig_1336-fgenesh-gene-0.0-mRNA-1	0	162.113	195.525	368.657	446.706	546.763	V-type proton ATPase subunit E
maker-pcu_contig_4529-fgenesh-gene-0.0-mRNA-1	0	200.33	171.146	368.511	100.366	162.534	3-isopropylmalate dehydrogenase
maker-pcu_contig_104-snap-gene-0.14-mRNA-1	0	0	467.247	366.908	0	275.951	Conserved gene of unknown function
maker-pcu_contig_928-snap-gene-0.4-mRNA-1	0	230.303	300.916	366.454	479.34	694.047	Cytochrome P450
maker-pcu_contig_20405-snap-gene-0.1-mRNA-1	0	500.192	184.336	366.131	275.657	870.352	Catalase-peroxidase
maker-pcu_contig_2210-snap-gene-0.0-mRNA-1	0	338.3	0	365.703	0	19.4607	Conserved gene of unknown function
maker-pcu_contig_498-snap-gene-0.10-mRNA-1	0	491.105	279.545	363.298	259.687	357.575	Actin-depolymerizing factor
maker-pcu_contig_127-snap-gene-0.19-mRNA-1	0	253.946	152.452	363.067	496.188	443.069	Conserved gene of unknown function
maker-pcu_contig_861-snap-gene-0.5-mRNA-1	0	300.622	189.124	363.028	340.831	351.956	Glutaredoxin
maker-pcu_contig_453-fgenesh-gene-0.4-mRNA-1	0	367.156	369.022	362.01	570.233	351.224	Protein enhancer of rudimentary
maker-pcu_contig_3579-fgenesh-gene-0.0-mRNA-1	0	551.289	270.119	359.509	387.108	511.919	Serine/threonine-protein phosphatase
maker-pcu_contig_3440-snap-gene-0.1-mRNA-1	0	0	0	358.261	316.239	563.561	Surface protein SdrI from Staphylococcus saprophyticus
maker-pcu_contig_957-fgenesh-gene-0.0-mRNA-1	0	315.805	246.132	357.725	256.205	262.159	Dihydrolipoyl dehydrogenase
maker-pcu_contig_6609-snap-gene-0.0-mRNA-1	0	381.443	320.398	356.85	212.945	236.466	Carbohydrate-binding protein
maker-pcu_contig_1209-snap-gene-0.2-mRNA-1	0	648.192	179.652	356.3	226.01	471.455	Fumarylacetoacetase
maker-pcu_contig_1741-snap-gene-0.7-mRNA-1	0	259.381	423.637	355.804	242.846	137.689	Eukaryotic translation initiation factor 3 subunit D-2
maker-pcu_contig_15944-fgenesh-gene-0.0-mRNA-1	0	528.401	0	355.262	323.501	459.995	PpiC-type peptidyl-prolyl cis-trans isomerase
maker-pcu_contig_3102-snap-gene-0.4-mRNA-1	0	0	0	354.181	323.728	216.432	Conserved gene of unknown function
maker-pcu_contig_23453-snap-gene-0.0-mRNA-1	0	0	0	353.167	170.299	334.233	Ferric reductase-like transmembrane component
maker-pcu_contig_1674-fgenesh-gene-0.1-mRNA-1	0	572.078	378.594	351.522	246.785	407.228	GTP-binding protein SAR1
maker-pcu_contig_453-fgenesh-gene-0.2-mRNA-1	0	439.464	542.307	349.994	556.548	412.471	Nuclear transport factor
maker-pcu_contig_1094-fgenesh-gene-0.1-mRNA-1	0	306.473	331.398	349.88	309.735	346.135	Phosphoglycerate mutase
maker-pcu_contig_610-snap-gene-0.4-mRNA-1	0	0	0	348.251	176.849	149.494	Elongation of very long chain fatty acids protein
maker-pcu_contig_26-fgenesh-gene-0.1-mRNA-1	0	289.735	252.38	347.381	206.677	254.337	Pyruvate dehydrogenase E1 component subunit alpha
maker-pcu_contig_702-fgenesh-gene-0.1-mRNA-1	0	381.443	280.348	346.246	349.363	419.741	Protein yrdA
maker-pcu_contig_814-fgenesh-gene-0.2-mRNA-1	0	456.436	0	345.38	276.777	269.576	Signal peptidase complex subunit 3
maker-pcu_contig_64-snap-gene-0.23-mRNA-1	0	324.75	435.712	345.285	394.631	442.281	Myosin
maker-pcu_contig_1374-fgenesh-gene-0.0-mRNA-1	0	0	0	344.497	0	242.902	Conserved gene of unknown function
maker-pcu_contig_867-fgenesh-gene-0.1-mRNA-1	0	285.28	194.478	343.754	290.824	251.717	26S protease regulatory subunit 4
maker-pcu_contig_829-fgenesh-gene-0.2-mRNA-1	0	402.801	201.869	342.235	280.315	257.13	Alanine aminotransferase 2
maker-pcu_contig_790-fgenesh-gene-0.0-mRNA-1	0	347.28	444.105	342.076	206.935	328.661	Syntaxin 5
maker-pcu_contig_1974-fgenesh-gene-0.2-mRNA-1	0	1546.77	252.628	341.438	377.782	316.713	Conserved gene of unknown function
maker-pcu_contig_4965-fgenesh-gene-0.0-mRNA-1	0	250.046	0	340.927	237.386	325.982	Conserved gene of unknown function
maker-pcu_contig_6576-snap-gene-0.1-mRNA-1	0	259.018	740.567	337.97	259.538	222.072	Gene of unknown function
maker-pcu_contig_105-fgenesh-gene-0.0-mRNA-1	0	352.42	446.932	337.863	337.548	364.781	ATP synthase subunit delta'
maker-pcu_contig_2878-fgenesh-gene-0.0-mRNA-1	0	221.463	214.788	334.171	40.1344	48.4286	Transglutaminase elicitor M81D
maker-pcu_contig_14230-fgenesh-gene-0.0-mRNA-1	0	280.15	0	333.956	231.12	320.238	Pyruvate kinase
maker-pcu_contig_11313-snap-gene-0.1-mRNA-1	0	586.392	527.803	333.77	305.552	433.018	Conserved gene of unknown function
maker-pcu_contig_1454-fgenesh-gene-0.0-mRNA-1	0	475.561	414.248	333.731	412.98	1038.4	Conserved gene of unknown function
maker-pcu_contig_841-fgenesh-gene-0.1-mRNA-1	0	460.55	285.835	328.525	307.457	397.097	Proteasome subunit alpha type
maker-pcu_contig_13309-snap-gene-0.1-mRNA-1	0	0	0	327.25	211.013	249.921	Phospholipase A2
maker-pcu_contig_3577-fgenesh-gene-0.0-mRNA-1	0	331.498	586.833	326.816	369.13	445.507	CUG-BP-and ETR-3-like factor
maker-pcu_contig_77-fgenesh-gene-0.4-mRNA-1	0	292.976	0	326.591	304.637	196.011	Malate synthase
maker-pcu_contig_264-fgenesh-gene-0.3-mRNA-1	0	374.67	0	325.645	130.94	166.631	Mitochondrial Carrier (MC) Family
maker-pcu_contig_5-fgenesh-gene-0.1-mRNA-1	0	336.769	318.638	325.444	385.734	307.07	Proteasome subunit alpha type
maker-pcu_contig_58-fgenesh-gene-0.1-mRNA-1	0	205.836	315.317	324.951	245.009	142.563	GTPase
maker-pcu_contig_138-fgenesh-gene-0.4-mRNA-1	0	249.701	351.358	323.891	175.141	332.178	Superoxide dismutase [Cu-Zn]
maker-pcu_contig_25303-snap-gene-0.0-mRNA-1	0	0	0	322.648	320.675	114.506	Conserved gene of unknown function
maker-pcu_contig_4040-snap-gene-0.1-mRNA-1	0	251.417	197.102	322.644	288.198	486.764	Proteasome subunit alpha type-3
maker-pcu_contig_1968-fgenesh-gene-0.0-mRNA-1	0	305.463	156.797	322.326	348.161	376.169	Flagellar associated protein
maker-pcu_contig_1179-fgenesh-gene-0.0-mRNA-1	0	303.963	198.58	319.913	191.373	241.576	Receptor expression-enhancing protein 5
maker-pcu_contig_278-fgenesh-gene-0.3-mRNA-1	0	187.449	209.369	319.412	214.636	256.398	Alpha-actinin-1
maker-pcu_contig_13-fgenesh-gene-0.6-mRNA-1	0	486.453	184.769	319.217	276.304	373.911	Fumarate hydratase, mitochondrial
maker-pcu_contig_33304-snap-gene-0.0-mRNA-1	0	0	0	319.051	0	77.976	Conserved gene of unknown function
maker-pcu_contig_26722-snap-gene-0.0-mRNA-1	0	929.991	237.886	318.928	70.9236	291.415	Conserved gene of unknown function
maker-pcu_contig_41-snap-gene-0.10-mRNA-1	0	348.972	186.533	318.824	428.746	273.175	Sphingolipid delta(4)-desaturase DES1
maker-pcu_contig_51-fgenesh-gene-0.5-mRNA-1	0	519.841	415.084	318.603	294.685	494.908	Proteasome subunit beta type
maker-pcu_contig_127-fgenesh-gene-0.5-mRNA-1	0	370.023	227.517	318.553	110.575	167.209	Serine hydroxymethyltransferase
maker-pcu_contig_137-snap-gene-0.7-mRNA-1	0	516.625	232.768	318.44	266.864	284.832	DNA topoisomerase 2
maker-pcu_contig_917-snap-gene-0.4-mRNA-1	0	0	0	316.983	357.644	257.615	Conserved gene of unknown function
maker-pcu_contig_7357-snap-gene-0.1-mRNA-1	0	230.947	316.477	315.019	348.526	126.809	BZIP1 protein
maker-pcu_contig_8099-snap-gene-0.3-mRNA-1	0	139.041	0	314.798	225.814	342.396	Conserved gene of unknown function
maker-pcu_contig_12287-snap-gene-0.0-mRNA-1	0	0	0	313.957	71.0533	26.6453	Aldose 1-epimerase
maker-pcu_contig_250-fgenesh-gene-0.0-mRNA-1	0	272.759	139.456	313.558	227.854	281.46	Coronin
maker-pcu_contig_5022-snap-gene-0.2-mRNA-1	0	257.999	337.151	313.487	60.1958	30.2897	Mannosyl-oligosaccharide alpha-1,2-mannosidase
maker-pcu_contig_26644-fgenesh-gene-0.0-mRNA-1	0	0	342.564	312.902	227.677	100.857	Protein phosphatase 2C
maker-pcu_contig_101-fgenesh-gene-0.0-mRNA-1	0	289.911	239.649	312.87	196.527	361.447	Mitochondrial-processing peptidase subunit beta
maker-pcu_contig_4044-snap-gene-0.1-mRNA-1	0	285.124	957.974	312.337	437.727	713.531	Annexin (Annexin) Family
maker-pcu_contig_142-fgenesh-gene-0.0-mRNA-1	0	207.982	176.271	311.505	230.647	191.025	Eukaryotic translation initiation factor 3 subunit E-interacting protein
maker-pcu_contig_135-snap-gene-0.27-mRNA-1	0	466.255	234.313	311.409	186.876	255.736	Glycine cleavage system H protein, mitochondrial
maker-pcu_contig_6195-snap-gene-0.0-mRNA-1	0	223.382	151.954	310.913	0	149.593	Gene of unknown function
maker-pcu_contig_6622-snap-gene-0.0-mRNA-1	0	223.382	151.954	310.913	0	149.593	Gene of unknown function
maker-pcu_contig_1267-snap-gene-0.8-mRNA-1	0	289.488	550.178	310.118	325.668	250.985	Protein phosphatase 2A regulatory B subunit
maker-pcu_contig_2023-snap-gene-0.1-mRNA-1	0	180.807	236.244	309.485	277.392	334.751	Neutral alpha-glucosidase
maker-pcu_contig_673-fgenesh-gene-0.0-mRNA-1	0	182.884	0	308.931	268.004	159.269	Calcineurin-like phosphoesterase
maker-pcu_contig_22-snap-gene-0.14-mRNA-1	0	230.808	368.025	308.084	249.695	274.688	Centrosomal protein of 135 kDa (Cep135 protein)
maker-pcu_contig_1769-snap-gene-0.3-mRNA-1	0	321.017	0	307.663	0	66.5253	ATP-binding Cassette (ABC) Superfamily
maker-pcu_contig_1982-snap-gene-0.1-mRNA-1	0	562.708	350.113	307.408	462.48	863.148	Conserved gene of unknown function
maker-pcu_contig_3537-fgenesh-gene-0.1-mRNA-1	0	175.556	170.399	305.947	313.619	273.965	Calnexin
maker-pcu_contig_103-fgenesh-gene-0.9-mRNA-1	0	208.694	272.681	305.883	228.351	201.297	Non-selective Cation Channel-2 (NSCC2) Family
maker-pcu_contig_47-snap-gene-0.15-mRNA-1	0	186.627	105.448	305.099	239.817	197.407	T-complex protein 1 subunit theta
maker-pcu_contig_129-fgenesh-gene-0.7-mRNA-1	0	318.762	0	302.899	0	151.143	13 kDa ribonucleoprotein-associated protein
maker-pcu_contig_259-snap-gene-0.5-mRNA-1	0	190.971	180.212	302.623	179.661	240.811	Adhesin protein
maker-pcu_contig_1058-fgenesh-gene-0.2-mRNA-1	0	383.177	0	302.385	278.338	415.752	Pyruvate kinase
maker-pcu_contig_19305-fgenesh-gene-0.0-mRNA-1	0	279.506	511.286	300.91	236.656	262.685	AP-4 complex subunit sigma
maker-pcu_contig_229-fgenesh-gene-0.0-mRNA-1	0	196.81	142.863	300.367	384.55	384.875	Thioredoxin-dependent peroxide reductase
maker-pcu_contig_34288-snap-gene-0.0-mRNA-1	0	0	0	299.839	0	82.0825	Carbohydrate-binding protein
maker-pcu_contig_15982-fgenesh-gene-0.0-mRNA-1	0	213.649	0	298.655	282.165	412.242	NaCl-inducible protein
maker-pcu_contig_322-snap-gene-0.10-mRNA-1	0	230.577	173.812	297.937	242.592	239.355	Alpha-soluble NSF attachment protein
maker-pcu_contig_2738-snap-gene-0.2-mRNA-1	0	70.308	2.85283	296.861	70.5907	62.3679	NAD-specific glutamate dehydrogenase encoded in antisense gene pair with dnaKJ
maker-pcu_contig_47-fgenesh-gene-0.0-mRNA-1	0	186.599	190.292	296.058	272.707	224.404	Translocation protein SEC63
maker-pcu_contig_9096-fgenesh-gene-0.0-mRNA-1	0	279.253	297.66	295.347	306.321	450.235	3-ketoacyl-CoA thiolase A
maker-pcu_contig_15123-snap-gene-0.2-mRNA-1	0	441.419	346.404	292.152	428.686	271.31	Conserved gene of unknown function
maker-pcu_contig_18066-snap-gene-0.0-mRNA-1	0	338.377	321.546	290.363	180.316	215.8	Proly 4-hydroxylase
maker-pcu_contig_828-fgenesh-gene-0.3-mRNA-1	0	201.449	180.527	290.358	101.209	264.712	NADH dehydrogenase [ubiquinone] iron-sulfur protein 4
maker-pcu_contig_80-fgenesh-gene-0.0-mRNA-1	0	330.085	218.263	289.384	217.57	835.584	K+ channel protein
maker-pcu_contig_373-fgenesh-gene-0.1-mRNA-1	0	265.76	157.838	289.348	196.694	283.019	NADH dehydrogenase flavoprotein 2, mitochondrial
maker-pcu_contig_108-snap-gene-0.7-mRNA-1	0	562.434	0	288.89	775.728	359.459	Conserved gene of unknown function
maker-pcu_contig_891-fgenesh-gene-0.2-mRNA-1	0	270.942	324.513	288.794	264.698	254.126	NADH-ubiquinone oxidoreductase B16.6 subunit
maker-pcu_contig_414-snap-gene-0.6-mRNA-1	0	870.585	258.526	288.474	197.596	280.976	Glutaryl-CoA dehydrogenase
maker-pcu_contig_32924-snap-gene-0.0-mRNA-1	0	0	678.237	287.87	312.074	411.749	Conserved gene of unknown function
maker-pcu_contig_102-snap-gene-0.11-mRNA-1	0	229.209	272.26	287.657	162.856	195.312	Eukaryotic translation initiation factor eIF-1A subunit
maker-pcu_contig_119-snap-gene-0.17-mRNA-1	0	105.548	144.604	286.055	284.319	177.931	Callose synthase
maker-pcu_contig_22149-snap-gene-0.1-mRNA-1	0	208.709	163.745	285.62	0	42.427	Carbohydrate-binding protein
maker-pcu_contig_158-snap-gene-0.9-mRNA-1	0	358.828	393.497	283.504	333.866	431.04	Cyclin E
maker-pcu_contig_31419-snap-gene-0.0-mRNA-1	0	0	0	283.119	0	43.7187	Carbohydrate-binding protein
maker-pcu_contig_446-fgenesh-gene-0.3-mRNA-1	0	360.286	233.201	282.424	73.2034	59.736	GA19496
maker-pcu_contig_381-snap-gene-0.8-mRNA-1	0	155.05	292.629	280.592	235.631	237.412	26S proteasome non-ATPase regulatory subunit 14
maker-pcu_contig_7207-snap-gene-0.1-mRNA-1	0	199.722	233.351	280.121	310.388	237.355	Glucosylceramidase
maker-pcu_contig_142-snap-gene-0.8-mRNA-1	0	152.553	0	279.687	132.478	144.617	Prohibitin
maker-pcu_contig_542-snap-gene-0.6-mRNA-1	0	226.415	152.144	279.645	202.238	226.404	NADP-specific glutamate dehydrogenase
maker-pcu_contig_72-fgenesh-gene-0.1-mRNA-1	0	0	0	277.867	194.22	160.656	Eukaryotic translation initiation factor 1b
maker-pcu_contig_22025-fgenesh-gene-0.0-mRNA-1	0	342.074	0	276.917	154.987	687.952	Catalase-peroxidase
maker-pcu_contig_1083-fgenesh-gene-0.1-mRNA-1	0	149.001	311.498	276.689	116.454	148.59	Eukaryotic translation initiation factor 3 subunit H
maker-pcu_contig_1044-fgenesh-gene-0.1-mRNA-1	0	140.91	105.208	276.437	222.883	282.985	26S proteasome non-ATPase regulatory subunit 12
maker-pcu_contig_3815-snap-gene-0.0-mRNA-1	0	274.346	312.84	276.359	323.249	269.581	Protein kinase
maker-pcu_contig_779-fgenesh-gene-0.3-mRNA-1	0	322.165	202.053	275.914	176.255	214.925	Superoxide dismutase
maker-pcu_contig_824-fgenesh-gene-0.1-mRNA-1	0	469.023	282.844	275.796	289.811	347.438	Proteasome subunit alpha type
maker-pcu_contig_607-snap-gene-0.10-mRNA-1	0	198.777	259.723	275.662	129.464	82.5068	NPP1
maker-pcu_contig_815-fgenesh-gene-0.0-mRNA-1	0	589.328	267.685	275.474	158.602	412.624	Transmembrane protein 198
maker-pcu_contig_207-snap-gene-0.11-mRNA-1	0	364.3	219.691	274.4	292.025	308.558	ALA-interacting subunit 3
maker-pcu_contig_1544-fgenesh-gene-0.0-mRNA-1	0	220.873	77.8745	274.281	159.839	224.034	Electron transfer flavoprotein-ubiquinone oxidoreductase
maker-pcu_contig_1583-snap-gene-0.1-mRNA-1	0	156.38	122.596	273.986	268.207	238.914	Calcium-transporting ATPase 1, endoplasmic reticulum-type
maker-pcu_contig_144-fgenesh-gene-0.2-mRNA-1	0	340.725	251.886	273.403	186.876	258.959	Wd-repeat protein
maker-pcu_contig_581-snap-gene-0.10-mRNA-1	0	168.068	163.13	273.349	203.289	132.162	DEAD/DEAH box RNA helicase
maker-pcu_contig_530-snap-gene-0.7-mRNA-1	0	172.199	188.837	273.329	176.242	214.086	Hsp70
maker-pcu_contig_204-fgenesh-gene-0.8-mRNA-1	0	361.741	210.068	273.251	261.781	269.734	NADH dehydrogenase
maker-pcu_contig_305-fgenesh-gene-0.3-mRNA-1	0	224.338	169.702	273.161	346.055	434.311	V-type proton ATPase subunit B
maker-pcu_contig_1601-fgenesh-gene-0.0-mRNA-1	0	0	0	272.949	185.644	76.9815	Gene of unknown function
maker-pcu_contig_22-fgenesh-gene-0.12-mRNA-1	0	503.905	282.174	271.714	225.048	414.234	Proteasome subunit beta type
maker-pcu_contig_892-fgenesh-gene-0.0-mRNA-1	0	0	0	271.576	0	295.435	Conserved gene of unknown function
maker-pcu_contig_37670-fgenesh-gene-0.0-mRNA-1	0	0	0	271.149	428.048	503.438	Pyruvate kinase
maker-pcu_contig_31504-snap-gene-0.0-mRNA-1	0	0	0	270.879	0	0	Aldose 1-epimerase
maker-pcu_contig_3-fgenesh-gene-0.2-mRNA-1	0	0	209.307	269.802	104.333	89.9291	50S ribosomal protein L7/L12
maker-pcu_contig_55-fgenesh-gene-0.4-mRNA-1	0	1039.53	395.441	267.693	171.404	687.042	4-hydroxyphenylpyruvate dioxygenase
maker-pcu_contig_1638-snap-gene-0.6-mRNA-1	0	116.628	152.388	267.427	296.246	189.398	Calcyclin binding protein
maker-pcu_contig_18219-fgenesh-gene-0.0-mRNA-1	0	0	0	266.676	0	166.259	Nucleosome assembly protein 1
maker-pcu_contig_2789-snap-gene-0.1-mRNA-1	0	342.493	0	266.392	329.29	267.659	Proteasome subunit beta type-3
maker-pcu_contig_142-fgenesh-gene-0.4-mRNA-1	0	455.131	283.18	266.033	268.198	418.923	Zinc finger CDGSH domain-containing protein 1
maker-pcu_contig_203-fgenesh-gene-0.0-mRNA-1	0	226.415	325.42	265.318	243.318	195.207	Myosin
maker-pcu_contig_1105-snap-gene-0.10-mRNA-1	0	123.408	289.501	265.226	211.901	127.89	H/ACA ribonucleoprotein complex subunit 4
maker-pcu_contig_541-fgenesh-gene-0.2-mRNA-1	0	241.061	344.501	264.453	220.787	314.555	Thioredoxin
maker-pcu_contig_218-snap-gene-0.9-mRNA-1	0	218.519	196.294	263.974	280.196	446.692	Acetyl-CoA acetyltransferase, cytosolic 2
maker-pcu_contig_32992-snap-gene-0.0-mRNA-1	0	0	0	263.43	0	0	Ammonium Transporter (Amt) Family
maker-pcu_contig_2-snap-gene-0.54-mRNA-1	0	234.547	180.271	263.168	220.156	271.161	26S protease regulatory subunit 8
maker-pcu_contig_21940-snap-gene-0.1-mRNA-1	0	0	211.434	262.655	0	0	PvLEA1 protein
maker-pcu_contig_150-fgenesh-gene-0.6-mRNA-1	0	345.412	198.58	262.147	317.955	518.205	Cysteine protease family C01A
maker-pcu_contig_2-snap-gene-0.29-mRNA-1	0	296.827	238.669	261.753	200.76	446.224	Proteasome subunit alpha type
maker-pcu_contig_723-fgenesh-gene-0.0-mRNA-1	0	166.731	0	261.522	133.652	79.2906	Gene of unknown function
maker-pcu_contig_812-snap-gene-0.6-mRNA-1	0	208.274	166.611	261.347	287.909	241.23	Endomembrane protein 70
maker-pcu_contig_2219-snap-gene-0.3-mRNA-1	0	147.549	174.132	261.26	216.998	221.055	Serine/threonine-protein phosphatase 2A 65 kDa regulatory subunit A
maker-pcu_contig_122-snap-gene-0.7-mRNA-1	0	360.01	185.306	261.195	149.212	106.581	Serine protease family S01A
maker-pcu_contig_3895-snap-gene-0.2-mRNA-1	0	224.286	178.899	260.639	288.379	233.658	Callose synthase
maker-pcu_contig_31-snap-gene-0.11-mRNA-1	0	370.717	130.914	260.216	319.757	201.464	Eukaryotic translation initiation factor 3 subunit F
maker-pcu_contig_1642-snap-gene-0.3-mRNA-1	0	0	0	259.522	0	230.845	Signal peptidase 12 kDa subunit
maker-pcu_contig_10363-snap-gene-0.1-mRNA-1	0	136.571	0	258.62	323.743	178.074	Callose synthase
maker-pcu_contig_1581-snap-gene-0.3-mRNA-1	0	276.274	154.706	258.281	308.465	266.625	Inorganic pyrophosphatase
maker-pcu_contig_3399-fgenesh-gene-0.1-mRNA-1	0	146.79	88.8815	258.277	212.196	217.505	Serine/threonine-protein phosphatase 6 regulatory subunit
maker-pcu_contig_516-fgenesh-gene-0.3-mRNA-1	0	161.898	133.973	257.884	105.445	46.4251	Conserved gene of unknown function
maker-pcu_contig_176-snap-gene-0.14-mRNA-1	0	221.861	229.212	257.027	315.882	352.839	Metalloprotease family M17
maker-pcu_contig_13175-snap-gene-0.1-mRNA-1	0	240.33	0	257.027	213.447	245.839	Dynactin subunit 5
maker-pcu_contig_222-snap-gene-0.22-mRNA-1	0	234.424	129.589	257.027	193.788	240.773	Protein transport protein SEC13
maker-pcu_contig_145-snap-gene-0.9-mRNA-1	0	196.331	153.917	256.67	281.317	213.149	Glycoside hydrolase
maker-pcu_contig_2393-fgenesh-gene-0.1-mRNA-1	0	0	213.24	256.594	177.156	168.208	Synaptobrevin
maker-pcu_contig_18-snap-gene-0.21-mRNA-1	0	387.069	0	256.299	578.346	1002.14	Conserved gene of unknown function
maker-pcu_contig_2072-snap-gene-0.2-mRNA-1	0	191.567	328.522	256.264	272.931	242.64	Whole genome shotgun sequence assembly, scaffold_96
maker-pcu_contig_5524-snap-gene-0.2-mRNA-1	0	314.262	453.743	254.903	0	170.104	ATP-binding Cassette (ABC) Superfamily
maker-pcu_contig_358-fgenesh-gene-0.4-mRNA-1	0	295.994	193.374	254.676	400.393	333.836	Serine protease family S10
maker-pcu_contig_2293-fgenesh-gene-0.1-mRNA-1	0	0	0	254.482	129.711	175.127	Cytochrome b5
maker-pcu_contig_857-snap-gene-0.4-mRNA-1	0	297.63	182.032	254.41	259.838	275.204	Kinesin heavy chain
maker-pcu_contig_417-snap-gene-0.6-mRNA-1	0	245.833	205.216	253.554	240.168	224.33	26S protease regulatory subunit 6B
maker-pcu_contig_327-snap-gene-0.2-mRNA-1	0	113.986	188.651	253.409	204.571	175.593	CRM1 C terminal Exportin 1
maker-pcu_contig_180-snap-gene-0.16-mRNA-1	0	195.2	146.653	252.996	168.453	244.843	Phosphoacetylglucosamine mutase
maker-pcu_contig_173-snap-gene-0.18-mRNA-1	0	590.406	367.691	252.468	132.97	268.998	Amino Acid/Auxin Permease (AAAP) Family
maker-pcu_contig_472-snap-gene-0.9-mRNA-1	0	255.163	222.265	251.075	265.902	244.18	Eukaryotic translation initiation factor 3 subunit
maker-pcu_contig_7419-snap-gene-0.1-mRNA-1	0	140.561	0	250.685	175.467	161.605	Nucleosome assembly protein 1
maker-pcu_contig_1917-fgenesh-gene-0.2-mRNA-1	0	252.837	213.762	250.388	184.047	173.336	Anthranilate synthase component 2
maker-pcu_contig_1400-snap-gene-0.1-mRNA-1	0	309.104	417.229	250.378	174.7	373.568	P-type ATPase (P-ATPase) Superfamily
maker-pcu_contig_921-snap-gene-0.6-mRNA-1	0	292.976	0	249.996	0	112.813	UPF0136 membrane protein
maker-pcu_contig_394-snap-gene-0.9-mRNA-1	0	0	0	248.879	196.087	207.236	Protein kinase
maker-pcu_contig_554-snap-gene-0.6-mRNA-1	0	324.227	0	248.879	181.003	324.225	Proteasome maturation protein
maker-pcu_contig_1524-fgenesh-gene-0.1-mRNA-1	0	186.427	65.9713	248.64	184.66	150.269	Prolyl-tRNA synthetase
maker-pcu_contig_495-snap-gene-0.7-mRNA-1	0	371.607	0	248.521	234.466	322.089	Thioredoxin
maker-pcu_contig_2828-fgenesh-gene-0.0-mRNA-1	0	371.68	219.536	248.454	205.599	275.183	Glutamate synthase
maker-pcu_contig_1866-snap-gene-0.2-mRNA-1	0	156.997	391.245	248.328	335.926	287.406	Callose synthase
maker-pcu_contig_803-fgenesh-gene-0.3-mRNA-1	0	117.295	169.39	248.002	128.664	153.172	Eukaryotic translation initiation factor 3
maker-pcu_contig_162-snap-gene-0.13-mRNA-1	0	402.6	0	247.571	297.177	275.417	Small ubiquitin-like modifier
maker-pcu_contig_13634-fgenesh-gene-0.0-mRNA-1	0	226.838	316.147	246.9	590.962	232.841	ADP-ribosylation factor
maker-pcu_contig_2238-fgenesh-gene-0.2-mRNA-1	0	195.393	172.947	246.81	229.89	212.444	26S protease regulatory subunit 7
maker-pcu_contig_5339-snap-gene-0.2-mRNA-1	0	233.369	243.937	246.111	293.855	687.404	Conserved gene of unknown function
maker-pcu_contig_5400-snap-gene-0.1-mRNA-1	0	158.183	62.6312	246.064	187.318	161.473	Chorismate mutase
maker-pcu_contig_1892-fgenesh-gene-0.0-mRNA-1	0	192.779	164.019	246.062	169.357	201.77	Transcriptional repressor TUP1
maker-pcu_contig_212-fgenesh-gene-0.5-mRNA-1	0	208.634	150.802	245.889	306.463	391.92	H-or Na-translocating F-type, V-type and A-type ATPase (F-ATPase) Superfamily
maker-pcu_contig_1054-snap-gene-0.3-mRNA-1	0	94.252	215.513	245.608	176.487	162.194	ATP-dependent RNA helicase DBP2
maker-pcu_contig_27-snap-gene-0.20-mRNA-1	0	296.156	143.007	245.567	188.695	257.643	3-hydroxyisobutyryl-CoA hydrolase
maker-pcu_contig_2298-snap-gene-0.3-mRNA-1	0	218.7	134.122	245.372	209.296	185.827	Choline-phosphate cytidylyltransferase B
maker-pcu_contig_31-fgenesh-gene-0.8-mRNA-1	0	252.926	149.501	244.97	152.965	161.499	Dicarboxylate/amino acid:cation
maker-pcu_contig_1291-snap-gene-0.3-mRNA-1	0	235.664	258.315	244.317	163.394	162.997	Gene of unknown function
maker-pcu_contig_1068-snap-gene-0.4-mRNA-1	0	276.281	205.487	244.068	238.079	251.586	Succinate dehydrogenase flavoprotein subunit, mitochondrial
maker-pcu_contig_2824-snap-gene-0.5-mRNA-1	0	85.3229	181.161	243.981	166.713	203.376	Aspartyl-tRNA synthetase
maker-pcu_contig_609-fgenesh-gene-0.3-mRNA-1	0	177.209	0	243.675	145.34	176.049	NUK7
maker-pcu_contig_87-fgenesh-gene-0.5-mRNA-1	0	170.08	157.899	243.379	157.416	119.963	ATP-binding cassette sub-family F member 2
maker-pcu_contig_301-snap-gene-0.10-mRNA-1	0	206.418	177.612	243.112	222.975	215.804	T-complex protein 1 subunit alpha
maker-pcu_contig_30055-snap-gene-0.1-mRNA-1	0	90.0522	0	242.442	163.184	131.099	Alpha-tubulin
maker-pcu_contig_184-fgenesh-gene-0.4-mRNA-1	0	0	0	241.908	0	99.716	Conserved gene of unknown function
maker-pcu_contig_397-snap-gene-0.6-mRNA-1	0	392.862	279.305	240.871	139.225	106.044	Lipoamide acyltransferase component of branched-chain alpha-keto acid dehydrogenase complex
maker-pcu_contig_216-fgenesh-gene-0.4-mRNA-1	0	195.317	196.31	240.784	127.211	121.806	Carbohydrate-binding protein
maker-pcu_contig_33177-snap-gene-0.1-mRNA-1	0	0	0	240.462	0	36.104	Conserved gene of unknown function
maker-pcu_contig_8703-fgenesh-gene-0.0-mRNA-1	0	398.299	0	239.778	368.626	339.66	Conserved gene of unknown function
maker-pcu_contig_22406-snap-gene-0.0-mRNA-1	0	242.173	558.397	239.771	630.913	682.388	CLPTM1-like membrane protein
maker-pcu_contig_4930-fgenesh-gene-0.0-mRNA-1	0	0	0	239.771	185.541	198.759	Novel protein containing SEA domains
maker-pcu_contig_1423-fgenesh-gene-0.1-mRNA-1	0	0	0	238.019	168.129	246.143	DNA-binding protein hexbp
maker-pcu_contig_1141-snap-gene-0.3-mRNA-1	0	145.829	0	237.909	142.469	127.227	Protein kinase
maker-pcu_contig_34-fgenesh-gene-0.3-mRNA-1	0	148.533	304.974	237.775	207.301	275.866	Phosphatidylinositol transfer protein beta isoform
maker-pcu_contig_3983-snap-gene-0.1-mRNA-1	0	323.379	76.1938	237.152	214.071	128.451	Quinolinate synthetase A protein
maker-pcu_contig_217-fgenesh-gene-0.5-mRNA-1	0	180.744	0	236.916	45.2766	61.8323	Aldose 1-epimerase
maker-pcu_contig_1250-snap-gene-0.3-mRNA-1	0	207.412	0	236.444	329.616	427.503	Glutathione S-transferase
maker-pcu_contig_14798-snap-gene-0.1-mRNA-1	0	0	354.212	236.187	0	297.801	Acylamino-acid-releasing enzyme
maker-pcu_contig_5586-fgenesh-gene-0.0-mRNA-1	0	159.396	0	235.45	145.941	273.511	ATP-binding Cassette (ABC) Superfamily
maker-pcu_contig_527-snap-gene-0.8-mRNA-1	0	211.604	184.336	235.37	258.931	243.39	Conserved gene of unknown function
maker-pcu_contig_548-fgenesh-gene-0.2-mRNA-1	0	134.858	92.7402	234.687	110.948	140.527	Actin
maker-pcu_contig_429-fgenesh-gene-0.0-mRNA-1	0	226.039	303.116	234.565	281.526	379.047	Myosin
maker-pcu_contig_677-snap-gene-0.2-mRNA-1	0	239.282	93.7942	234.214	268.833	616.816	Phox domain-containing protein
maker-pcu_contig_2267-snap-gene-0.2-mRNA-1	0	201.269	262.98	233.661	0	276.784	Clathrin assembly protein AP19
maker-pcu_contig_1524-fgenesh-gene-0.0-mRNA-1	0	455.944	397.16	233.513	247.465	131.719	Conserved gene of unknown function
maker-pcu_contig_149-fgenesh-gene-0.5-mRNA-1	0	220.027	141.97	233.144	106.151	133.066	Glycine dehydrogenase, mitochondrial
maker-pcu_contig_17839-snap-gene-0.0-mRNA-1	0	0	0	232.85	99.9491	41.1721	Conserved gene of unknown function
maker-pcu_contig_371-fgenesh-gene-0.2-mRNA-1	0	324.467	274.783	232.203	215.24	316.246	Adenylyl cyclase-associated protein
maker-pcu_contig_274-snap-gene-0.5-mRNA-1	0	269.569	242.911	231.886	163.463	188.193	Dihydrodipicolinate synthase
maker-pcu_contig_154-fgenesh-gene-0.2-mRNA-1	0	109.684	128.983	231.411	225.029	223.321	DnaJ subfamily C protein
maker-pcu_contig_2353-fgenesh-gene-0.0-mRNA-1	0	136.503	118.904	231.407	220.145	238.684	AP-1 complex subunit mu
maker-pcu_contig_2359-snap-gene-0.2-mRNA-1	0	297.887	235.582	231.349	306.34	390.368	Phosphatidic acid phosphatase
maker-pcu_contig_10906-fgenesh-gene-0.0-mRNA-1	0	205.207	0	230.8	187.113	251.499	Whole genome shotgun sequence assembly, scaffold_142
maker-pcu_contig_1042-snap-gene-0.3-mRNA-1	0	326.332	151.299	230.554	281.103	364.439	Cystatin-like cysteine protease inhibitor EPIC4
maker-pcu_contig_16162-snap-gene-0.0-mRNA-1	0	168.776	0	230.519	0	20.6467	Mannosyl-oligosaccharide alpha-1,2-mannosidase
maker-pcu_contig_3632-snap-gene-0.1-mRNA-1	0	205.728	215.044	230.506	227.785	195.033	Conserved gene of unknown function
maker-pcu_contig_449-snap-gene-0.9-mRNA-1	0	131.632	142.981	230.266	144.146	79.1482	Myosin heavy chain
maker-pcu_contig_4-snap-gene-0.19-mRNA-1	0	330.489	511.365	230.19	419.168	453.205	Conserved gene of unknown function
maker-pcu_contig_192-snap-gene-0.11-mRNA-1	0	113.062	215.91	230.19	107.624	154.814	Serine/threonine-protein phosphatase
maker-pcu_contig_379-snap-gene-0.5-mRNA-1	0	185.135	189.312	229.379	183.49	276.101	Conserved gene of unknown function
maker-pcu_contig_6844-snap-gene-0.0-mRNA-1	0	0	0	229.379	0	92.5114	Peroxisomal acyl-coenzyme A oxidase
maker-pcu_contig_5015-snap-gene-0.1-mRNA-1	0	154.027	120.752	228.903	180.573	243.89	Methylcrotonoyl-CoA carboxylase subunit alpha
maker-pcu_contig_221-fgenesh-gene-0.4-mRNA-1	0	224.658	176.124	228.723	105.351	126.436	Pyridoxal biosynthesis lyase pdxS
maker-pcu_contig_1-snap-gene-0.33-mRNA-1	0	344.507	254.794	228.101	211.678	435.412	Isovaleryl-CoA dehydrogenase
maker-pcu_contig_478-snap-gene-0.6-mRNA-1	0	162.268	201.924	228.032	241.568	278.321	Alcohol dehydrogenase
maker-pcu_contig_956-snap-gene-0.0-mRNA-1	0	196.524	169.571	227.945	41.0555	40.3797	Haustorium-specific membrane protein
maker-pcu_contig_887-snap-gene-0.4-mRNA-1	0	306.015	146.284	227.836	247.921	337.354	Protein phosphatase 2C
maker-pcu_contig_933-fgenesh-gene-0.1-mRNA-1	0	292.235	0	227.596	240.422	314.312	Conserved gene of unknown function
maker-pcu_contig_213-fgenesh-gene-0.2-mRNA-1	0	433.234	173.472	227.481	91.0217	158.39	Aminomethyltransferase
maker-pcu_contig_581-snap-gene-0.7-mRNA-1	0	227.91	129.474	227.067	187.162	257.587	3,2-trans-enoyl-CoA isomerase, mitochondrial
maker-pcu_contig_3415-snap-gene-0.1-mRNA-1	0	223.201	203.152	226.898	161.683	203.486	Dihydrolipoamide succinyltransferase
maker-pcu_contig_3939-fgenesh-gene-0.0-mRNA-1	0	220.597	207.797	226.875	207.161	222.851	T-complex protein 1 subunit epsilon
maker-pcu_contig_577-snap-gene-0.8-mRNA-1	0	102.326	133.7	226.816	333.226	305.17	Cysteine protease family C01A
maker-pcu_contig_3906-fgenesh-gene-0.1-mRNA-1	0	0	0	226.532	397.601	329.281	Flagellar outer dynein arm light chain 8
maker-pcu_contig_24529-snap-gene-0.0-mRNA-1	0	1983.21	589.418	226.254	126.601	42.5429	Adenosylhomocysteinase
maker-pcu_contig_580-snap-gene-0.3-mRNA-1	0	97.5984	150.412	226.209	195.588	183.871	Eukaryotic translation initiation factor 3 subunit A
maker-pcu_contig_507-snap-gene-0.5-mRNA-1	0	374.632	0	226.053	155.272	532.111	RING-H2 finger protein ATL1G
maker-pcu_contig_71-fgenesh-gene-0.2-mRNA-1	0	151.508	0	226.018	204.404	153.922	Proliferating cell nuclear antigen
maker-pcu_contig_731-snap-gene-0.2-mRNA-1	0	129.55	0	224.71	73.5634	118.177	Eukaryotic translation initiation factor 3
maker-pcu_contig_7975-fgenesh-gene-0.0-mRNA-1	0	0	315.125	224.314	1044.92	1083.03	Conserved gene of unknown function
maker-pcu_contig_3203-fgenesh-gene-0.0-mRNA-1	0	279.966	174.193	224.314	225.758	128.447	Conserved gene of unknown function
maker-pcu_contig_1937-snap-gene-0.0-mRNA-1	0	136.954	159.063	224.314	122.236	150.527	Glucosidase
maker-pcu_contig_12491-snap-gene-0.1-mRNA-1	0	456.725	362.6	223.886	256.055	156.198	Propionate-CoA ligase protein
maker-pcu_contig_518-fgenesh-gene-0.3-mRNA-1	0	0	0	223.689	0	87.3531	Ribosomal protein L23
maker-pcu_contig_21-fgenesh-gene-0.9-mRNA-1	0	183.816	147.204	223.108	162.201	189.624	Eukaryotic translation initiation factor 2 subunit 3
maker-pcu_contig_788-snap-gene-0.9-mRNA-1	0	505.75	321.479	223.047	89.0263	102.225	SCP-like extracellular protein
maker-pcu_contig_10496-snap-gene-0.1-mRNA-1	0	149.643	0	222.465	105.585	139.828	Diacylglycerol O-acyltransferase
maker-pcu_contig_2666-snap-gene-0.1-mRNA-1	0	247.376	247.804	222.407	182.599	244.99	Acetylornithine aminotransferase, mitochondrial
maker-pcu_contig_693-fgenesh-gene-0.3-mRNA-1	0	257.834	505.333	222.071	220.406	225.012	Gene of unknown function
maker-pcu_contig_708-snap-gene-0.8-mRNA-1	0	220.663	0	221.832	277.556	255.521	Tubulin alpha chain
maker-pcu_contig_590-fgenesh-gene-0.0-mRNA-1	0	199.874	156.694	221.787	284.391	336.107	Phospho-2-dehydro-3-deoxyheptonate aldolase
maker-pcu_contig_71-snap-gene-0.18-mRNA-1	0	260.539	208.036	221.495	197.972	349.831	Zfand5 protein (Zinc finger protein 216 (Predicted), isoform CRA_a)
maker-pcu_contig_233-fgenesh-gene-0.5-mRNA-1	0	273.225	0	221.349	0	230	NADH dehydrogenase (Ubiquinone)
maker-pcu_contig_9-fgenesh-gene-0.6-mRNA-1	0	234.589	169.39	219.748	172.893	209.836	Disulfide-isomerase
maker-pcu_contig_12795-snap-gene-0.1-mRNA-1	0	239.459	297.16	219.626	230.032	272.737	6-phosphogluconolactonase
maker-pcu_contig_1374-snap-gene-0.2-mRNA-1	0	0	0	219.596	0	157.65	Acetylornithine aminotransferase, mitochondrial
maker-pcu_contig_574-snap-gene-0.4-mRNA-1	0	191.76	87.4955	219.536	216.087	235.459	26S proteasome non-ATPase regulatory subunit 2
maker-pcu_contig_1849-snap-gene-0.2-mRNA-1	0	171.215	0	219.202	343.697	298.369	Alpha-tubulin
maker-pcu_contig_12212-snap-gene-0.1-mRNA-1	0	178.147	0	218.359	0	46.1889	Cell 12A endoglucanase
maker-pcu_contig_680-snap-gene-0.7-mRNA-1	0	139.753	182.602	217.545	165.981	121.531	Trans-sialidase
maker-pcu_contig_8767-fgenesh-gene-0.0-mRNA-1	0	144.229	150.761	216.444	187.874	205.898	26S proteasome non-ATPase regulatory subunit 11
maker-pcu_contig_4892-snap-gene-0.1-mRNA-1	0	136.836	436.099	215.812	294.055	266.07	DNA repair protein REV1
maker-pcu_contig_381-fgenesh-gene-0.6-mRNA-1	0	97.3237	90.8313	215.699	172.051	119.675	Fatty acid desaturase
maker-pcu_contig_293-fgenesh-gene-0.2-mRNA-1	0	131.143	85.6765	215.364	197.11	224.161	Aldehyde dehydrogenase
maker-pcu_contig_160-snap-gene-0.7-mRNA-1	0	79.5705	250.897	214.916	128.919	135.534	Fatty acid synthase subunit alpha
maker-pcu_contig_252-snap-gene-0.9-mRNA-1	0	257.16	0	214.789	254.583	98.994	Zinc finger protein 2
maker-pcu_contig_100-snap-gene-0.14-mRNA-1	0	251.99	0	214.748	246.183	190.786	Conserved gene of unknown function
maker-pcu_contig_2364-snap-gene-0.3-mRNA-1	0	495.876	348.878	214.392	198.748	698.112	Conserved gene of unknown function
maker-pcu_contig_1469-snap-gene-0.1-mRNA-1	0	210.537	137.545	214.275	379.727	356.789	Malate dehydrogenase
maker-pcu_contig_527-fgenesh-gene-0.2-mRNA-1	0	264.315	0	214.072	215.187	247.859	MCG18900
maker-pcu_contig_3744-fgenesh-gene-0.0-mRNA-1	0	0	0	213.206	0	80.9755	Aldose 1-epimerase
maker-pcu_contig_523-snap-gene-0.3-mRNA-1	0	91.6516	0	213.006	249.971	324.405	Zinc finger C3HC4/FHA domain-containing protein
maker-pcu_contig_2131-snap-gene-0.3-mRNA-1	0	256.509	0	212.519	124.105	178.763	Biotin synthase
maker-pcu_contig_498-snap-gene-0.11-mRNA-1	0	321.792	0	212.483	181.262	199.76	C2 domain protein
maker-pcu_contig_32-fgenesh-gene-0.7-mRNA-1	0	0	0	212.327	156.528	286.812	Conserved gene of unknown function
maker-pcu_contig_1445-snap-gene-0.4-mRNA-1	0	176.897	189.861	212.047	172.821	129.578	Asp1
maker-pcu_contig_935-fgenesh-gene-0.2-mRNA-1	0	132.23	146.856	211.842	206.692	201.054	DEAD/DEAH box RNA helicase
maker-pcu_contig_730-snap-gene-0.7-mRNA-1	0	186.151	200.926	211.79	292.56	415.808	Glucosylceramidase
maker-pcu_contig_482-snap-gene-0.13-mRNA-1	0	241.868	267.407	211.298	294.863	311.311	Trifunctional enzyme subunit beta, mitochondrial
maker-pcu_contig_102-fgenesh-gene-0.6-mRNA-1	0	310.761	169.184	211.232	126.5	214.098	Proteasome subunit beta type-6
maker-pcu_contig_23440-snap-gene-0.1-mRNA-1	0	0	0	210.659	163.517	126.577	Enolase
maker-pcu_contig_268-fgenesh-gene-0.3-mRNA-1	0	106.019	125.933	210.643	134.963	114.673	Hsp70
maker-pcu_contig_10924-snap-gene-0.0-mRNA-1	0	304.484	157.801	210.567	0	19.0994	NPP1
maker-pcu_contig_197-fgenesh-gene-0.0-mRNA-1	0	206.777	194.527	210.462	215.48	231.496	LAG1 longevity assurance homolog 5.
maker-pcu_contig_266-snap-gene-0.5-mRNA-1	0	218.416	221.966	210.26	268.705	336.62	Rab2 family GTPase
maker-pcu_contig_10370-fgenesh-gene-0.0-mRNA-1	0	163.679	362.639	209.966	125.145	175.612	S-adenosylmethionine decarboxylase proenzyme
maker-pcu_contig_630-snap-gene-0.7-mRNA-1	0	173.659	165.579	209.915	158.959	138.591	Cell 5A endo-1,4-betaglucanase
maker-pcu_contig_923-fgenesh-gene-0.2-mRNA-1	0	226.113	173.411	209.869	243.313	198.007	5-aminolevulinate synthase
maker-pcu_contig_1677-snap-gene-0.2-mRNA-1	0	406.828	87.4728	209.417	57.0187	159.471	Aldehyde dehydrogenase family 7 member A1
maker-pcu_contig_126-snap-gene-0.19-mRNA-1	0	0	0	209.36	0	118.094	U6 snRNA-associated Sm
maker-pcu_contig_10-snap-gene-0.28-mRNA-1	0	199.627	0	209.214	349.422	179.402	Acetyl-coenzyme A synthetase
maker-pcu_contig_952-snap-gene-0.2-mRNA-1	0	238.402	0	208.665	221.818	159.388	Monothiol glutaredoxin-5, mitochondrial
maker-pcu_contig_1046-snap-gene-0.6-mRNA-1	0	192.876	181.832	208.287	193.997	177.982	Myosin
maker-pcu_contig_2223-snap-gene-0.2-mRNA-1	0	172.017	149.84	207.805	232.559	390.476	NAD-specific glutamate dehydrogenase
maker-pcu_contig_245-snap-gene-0.6-mRNA-1	0	106.42	162.224	207.653	196.384	50.9267	S-adenosyl-L-methionine-dependent methyltransferase
maker-pcu_contig_231-fgenesh-gene-0.7-mRNA-1	0	0	0	207.567	0	212.213	Putative mitochondrial NADH:ubiquinone oxidoreductase 19 kDa subunit
maker-pcu_contig_21531-snap-gene-0.0-mRNA-1	0	367.71	582.536	207.561	0	79.9378	Conserved gene of unknown function
maker-pcu_contig_1776-fgenesh-gene-0.1-mRNA-1	0	188.261	157.156	207.349	180.517	194.184	T-complex protein 1 subunit beta
maker-pcu_contig_135-fgenesh-gene-0.2-mRNA-1	0	113.498	123.581	207.066	129.363	116.8	Spermidine synthase
maker-pcu_contig_1442-snap-gene-0.1-mRNA-1	0	138.523	148.087	206.901	169.505	134.755	Lysyl-tRNA synthetase
maker-pcu_contig_5187-snap-gene-0.0-mRNA-1	0	127.731	0	206.895	104.047	48.2497	Carbohydrate-binding protein
maker-pcu_contig_959-snap-gene-0.4-mRNA-1	0	0	0	206.838	0	51.4729	Conserved gene of unknown function
maker-pcu_contig_72-fgenesh-gene-0.3-mRNA-1	0	272.612	0	206.823	224.204	421.558	Iron sulfur cluster assembly protein 1, mitochondrial
maker-pcu_contig_1599-snap-gene-0.5-mRNA-1	0	0	0	206.681	0	14.9466	Conserved gene of unknown function
maker-pcu_contig_16781-snap-gene-0.0-mRNA-1	0	122.956	128.383	205.861	0	17.3362	Necrosis-inducing
maker-pcu_contig_137-snap-gene-0.9-mRNA-1	0	192.809	277.118	205.72	221.016	248.106	Contig An08c0030, complete genome
maker-pcu_contig_2485-fgenesh-gene-0.1-mRNA-1	0	0	0	205.622	163.444	130.484	Conserved gene of unknown function
maker-pcu_contig_664-snap-gene-0.9-mRNA-1	0	130.923	110.689	205.426	102.826	137.947	3-isopropylmalate dehydratase large subunit
maker-pcu_contig_921-snap-gene-0.13-mRNA-1	0	152.675	181.352	205.268	90.3982	143.734	H/ACA ribonucleoprotein complex subunit
maker-pcu_contig_13083-snap-gene-0.0-mRNA-1	0	0	203.89	205.165	0	53.5097	Secreted RxLR effector peptide protein
maker-pcu_contig_7750-snap-gene-0.1-mRNA-1	0	217.86	181.544	204.896	239.496	216.342	Conserved gene of unknown function
maker-pcu_contig_232-snap-gene-0.9-mRNA-1	0	144.888	136.725	204.802	68.1533	107.437	Adenosine kinase
maker-pcu_contig_7-snap-gene-0.18-mRNA-1	0	383.627	291.049	204.52	145.079	204.993	Threonine dehydratase catabolic
maker-pcu_contig_141-fgenesh-gene-0.0-mRNA-1	0	277.815	320.29	203.75	212.873	185.295	Adenylate kinase
maker-pcu_contig_75-snap-gene-0.5-mRNA-1	0	98.0525	288.261	203.75	212.873	39.8737	High-affinity nickel transporter
maker-pcu_contig_609-snap-gene-0.11-mRNA-1	0	0	388.982	203.543	167.456	137.195	Glycylpeptide N-tetradecanoyltransferase
maker-pcu_contig_850-snap-gene-0.3-mRNA-1	0	207.021	353.725	203.183	186.693	192.545	Coatomer subunit zeta-1
maker-pcu_contig_805-snap-gene-0.3-mRNA-1	0	180.337	161.22	202.964	129.818	92.6794	50S ribosomal protein L3-2
maker-pcu_contig_24289-snap-gene-0.0-mRNA-1	0	0	608.995	202.782	322.838	281.369	Crinkler (CRN) family protein
maker-pcu_contig_1059-fgenesh-gene-0.0-mRNA-1	0	163.201	157.124	202.132	296.504	375.681	T-complex protein 1 subunit eta
maker-pcu_contig_88-snap-gene-0.11-mRNA-1	0	0	0	201.5	128.477	162.741	Splicing factor, arginine/serine-rich
maker-pcu_contig_348-fgenesh-gene-0.0-mRNA-1	0	162.218	140.164	200.639	165.296	216.231	2-oxoglutarate dehydrogenase E1 component
maker-pcu_contig_3558-fgenesh-gene-0.0-mRNA-1	0	119.719	239.239	200.606	142.187	151.549	Conserved gene of unknown function
maker-pcu_contig_531-snap-gene-0.3-mRNA-1	0	108.975	94.9251	200.478	219.687	158.466	T-complex protein 1 subunit gamma
maker-pcu_contig_3406-snap-gene-0.2-mRNA-1	0	228.933	280.431	200.163	335.487	401.33	Cyclin
maker-pcu_contig_53-snap-gene-0.16-mRNA-1	0	162.743	0	200.151	174.38	174.618	Glucose-6-phosphate 1-dehydrogenase
maker-pcu_contig_729-snap-gene-0.4-mRNA-1	0	196.41	0	199.856	127.922	184.276	Histidinol-phosphate aminotransferase
maker-pcu_contig_104-snap-gene-0.11-mRNA-1	0	162.113	156.077	199.759	127.814	138.399	Eukaryotic translation initiation factor 3 subunit G
maker-pcu_contig_17-snap-gene-0.25-mRNA-1	0	212.424	219.123	199.356	109.226	151.006	Transcription factor APFI
maker-pcu_contig_35150-snap-gene-0.0-mRNA-1	0	0	0	199.281	0	0	Glucanase inhibitor protein
maker-pcu_contig_439-fgenesh-gene-0.0-mRNA-1	0	130.107	0	198.989	271.166	269.386	ER lumen protein retaining receptor
maker-pcu_contig_402-snap-gene-0.8-mRNA-1	0	150.291	274.919	198.989	117.462	113.683	Conserved gene of unknown function
maker-pcu_contig_397-snap-gene-0.8-mRNA-1	0	240.391	215.941	198.742	161.46	117.495	2-oxoisovalerate dehydrogenase subunit beta, mitochondrial
maker-pcu_contig_3956-snap-gene-0.1-mRNA-1	0	139.609	127.69	198.531	200.041	248.369	26S proteasome non-ATPase regulatory subunit
maker-pcu_contig_236-snap-gene-0.10-mRNA-1	0	259.151	282.174	198.278	112.524	190.548	Flagellar adenylate kinase
maker-pcu_contig_232-fgenesh-gene-0.6-mRNA-1	0	266.156	0	198.189	267.903	670.759	Conserved gene of unknown function
maker-pcu_contig_7205-snap-gene-0.0-mRNA-1	0	181.048	166.939	198.007	263.6	266.199	Myosin
maker-pcu_contig_30-snap-gene-0.21-mRNA-1	0	534.447	348.09	197.84	131.595	226.338	Conserved gene of unknown function
maker-pcu_contig_12114-snap-gene-0.1-mRNA-1	0	0	0	197.465	136.897	82.3279	Conserved gene of unknown function
maker-pcu_contig_226-fgenesh-gene-0.5-mRNA-1	0	147.465	102.762	197.377	124.858	139.521	Translation elongation factor 1-alpha
maker-pcu_contig_30956-snap-gene-0.1-mRNA-1	0	3249.92	1698.55	196.767	373.355	94.3423	GD13692
maker-pcu_contig_509-fgenesh-gene-0.2-mRNA-1	0	0	0	196.681	226.578	237.014	Gene of unknown function
maker-pcu_contig_970-fgenesh-gene-0.0-mRNA-1	0	179.594	101.685	196.12	155.96	133.78	Equilibrative Nucleoside Transporter (ENT) Family
maker-pcu_contig_955-fgenesh-gene-0.1-mRNA-1	0	119.201	113.272	195.568	127.041	107.207	Inosine-5'-monophosphate dehydrogenase
maker-pcu_contig_4843-fgenesh-gene-0.0-mRNA-1	0	235.373	0	195.115	114.975	126.991	Nucleoside diphosphate kinase
maker-pcu_contig_7-snap-gene-0.32-mRNA-1	0	0	380.337	194.739	218.754	203.54	Protein kinase
maker-pcu_contig_1046-snap-gene-0.3-mRNA-1	0	0	0	194.288	0	178.088	Peptidyl-prolyl cis-trans isomerase 1
maker-pcu_contig_314-snap-gene-0.13-mRNA-1	0	242.737	294.507	194.149	158.095	161.782	Mitochondrial Carrier (MC) Family
maker-pcu_contig_664-snap-gene-0.5-mRNA-1	0	133.723	174.724	193.834	87.0943	178.78	F-actin-capping protein subunit alpha
maker-pcu_contig_25469-snap-gene-0.0-mRNA-1	0	0	0	193.411	265.775	223.692	Conserved gene of unknown function
maker-pcu_contig_3601-snap-gene-0.1-mRNA-1	0	120.474	447.643	193.189	299.15	277.286	Transmembrane protein
maker-pcu_contig_2404-fgenesh-gene-0.0-mRNA-1	0	0	0	193.125	0	105.733	Mitochondrial Protein Translocase (MPT) Family
maker-pcu_contig_883-snap-gene-0.6-mRNA-1	0	122.946	0	192.211	131.552	118.507	Vapa protein
maker-pcu_contig_20013-snap-gene-0.1-mRNA-1	0	0	0	192.191	84.8748	46.1067	Glucanase inhibitor protein 1
maker-pcu_contig_52-snap-gene-0.10-mRNA-1	0	127.481	159.627	191.715	128.003	103.572	Ras GTPase-activating protein-binding protein
maker-pcu_contig_662-snap-gene-0.3-mRNA-1	0	211.567	146.856	191.667	116.264	221.918	Actin
maker-pcu_contig_975-fgenesh-gene-0.2-mRNA-1	0	156.48	0	191.647	0	146.389	60S ribosomal protein L18
maker-pcu_contig_8173-snap-gene-0.2-mRNA-1	0	0	288.261	191.276	223.517	216.96	Acylamino-acid-releasing enzyme
maker-pcu_contig_139-snap-gene-0.17-mRNA-1	0	182.326	129.324	190.66	152.678	165.053	Coatomer subunit delta
maker-pcu_contig_1074-snap-gene-0.5-mRNA-1	0	157.392	192.796	190.344	320.343	422.408	Ubiquitin family protein
maker-pcu_contig_619-fgenesh-gene-0.1-mRNA-1	0	239.971	0	190.327	225.758	304.821	Cysteine dioxygenase
maker-pcu_contig_1938-fgenesh-gene-0.0-mRNA-1	0	205.207	173.493	190.277	110.066	62.3206	Transcription factor
maker-pcu_contig_15194-snap-gene-0.0-mRNA-1	0	0	0	189.976	156.528	208.01	Conserved gene of unknown function
maker-pcu_contig_227-snap-gene-0.4-mRNA-1	0	463.711	0	189.513	386.582	424.924	Ubiquitin carrier protein
maker-pcu_contig_1221-snap-gene-0.6-mRNA-1	0	100.567	249.662	189.489	111.349	177.661	Endoplasmic reticulum-Golgi intermediate compartment protein
maker-pcu_contig_119-snap-gene-0.20-mRNA-1	0	0	0	189.44	211.573	300.538	H-or Na-translocating F-type, V-type and A-type ATPase (F-ATPase) Superfamily
maker-pcu_contig_891-snap-gene-0.4-mRNA-1	0	127.481	145.747	189.015	217.951	230.752	26S proteasome non-ATPase regulatory subunit 3
maker-pcu_contig_2239-snap-gene-0.2-mRNA-1	0	0	0	188.836	0	192.323	DEHA2B12122p
maker-pcu_contig_4133-fgenesh-gene-0.0-mRNA-1	0	0	0	188.767	222.826	72.2533	Conserved gene of unknown function
maker-pcu_contig_194-snap-gene-0.10-mRNA-1	0	210.82	0	188.61	407.189	297.265	Serine protease family S33
maker-pcu_contig_5534-snap-gene-0.1-mRNA-1	0	0	543.9	188.536	188.276	199.402	Glutathione synthetase
maker-pcu_contig_680-fgenesh-gene-0.0-mRNA-1	0	354.269	0	187.914	203.048	244.609	Rab5 family GTPase
maker-pcu_contig_5587-fgenesh-gene-0.0-mRNA-1	0	268.561	0	187.497	0	186.846	Mannitol dehydrogenase
maker-pcu_contig_579-fgenesh-gene-0.0-mRNA-1	0	197.533	151.299	187.086	221.818	325.385	Programmed cell death protein
maker-pcu_contig_30974-snap-gene-0.0-mRNA-1	0	190.376	0	186.953	0	0	Pectinesterase
maker-pcu_contig_635-snap-gene-0.3-mRNA-1	0	0	144.029	186.929	191.451	212.992	(Fragment)
maker-pcu_contig_2179-snap-gene-0.1-mRNA-1	0	102.055	96.9792	186.929	122.867	161.263	Phospholipase C
maker-pcu_contig_97-fgenesh-gene-0.4-mRNA-1	0	0	257.866	186.929	0	81.1087	50S ribosomal protein L22
maker-pcu_contig_2632-snap-gene-0.2-mRNA-1	0	0	0	186.929	0	71.5495	Signal recognition particle
maker-pcu_contig_51-snap-gene-0.18-mRNA-1	0	158.085	233.207	186.458	174.37	205.969	Argonaute3 (AGO3)
maker-pcu_contig_40-snap-gene-0.32-mRNA-1	0	188.673	175.409	186.175	172.509	253.182	Forkhead-associated domain-containing protein
maker-pcu_contig_387-snap-gene-0.4-mRNA-1	0	70.0412	158.074	185.973	151.369	161.458	Importin subunit beta
maker-pcu_contig_179-fgenesh-gene-0.4-mRNA-1	0	195.561	0	185.214	0	60.9432	Cyclopropane-fatty-acyl-phospholipid synthase
maker-pcu_contig_10491-snap-gene-0.0-mRNA-1	0	0	0	184.885	0	0	GF14769
maker-pcu_contig_836-fgenesh-gene-0.3-mRNA-1	0	314.783	0	184.738	184.518	210.677	Glycosyl hydrolase
maker-pcu_contig_1296-fgenesh-gene-0.0-mRNA-1	0	0	0	184.35	0	135.983	Conserved gene of unknown function
maker-pcu_contig_90-snap-gene-0.18-mRNA-1	0	114.547	271.432	184.33	123.92	105.366	Kinesin family member 3B-like, partial
maker-pcu_contig_6793-snap-gene-0.0-mRNA-1	0	0	0	184.139	0	209.899	Copine
maker-pcu_contig_959-fgenesh-gene-0.0-mRNA-1	0	122.923	122.821	183.919	169.539	227.199	26S proteasome non-ATPase regulatory subunit 13
maker-pcu_contig_1036-snap-gene-0.3-mRNA-1	0	96.7027	0	183.838	130.811	145.958	AP-4 complex subunit epsilon
maker-pcu_contig_104-fgenesh-gene-0.7-mRNA-1	0	169.088	134.63	183.818	264.995	260.731	Aspartate aminotransferase
maker-pcu_contig_839-snap-gene-0.7-mRNA-1	0	180.362	221.8	183.735	207.301	251.48	26S proteasome non-ATPase regulatory subunit
maker-pcu_contig_11583-snap-gene-0.0-mRNA-1	0	471.603	0	183.691	0	0	Elongation factor Tu, chloroplastic
maker-pcu_contig_23-fgenesh-gene-0.6-mRNA-1	0	164.582	0	183.357	127.292	135.932	NADP oxidoreductase coenzyme F420-dependent
maker-pcu_contig_2586-snap-gene-0.3-mRNA-1	0	0	0	183.227	155.654	100.482	Conserved gene of unknown function
maker-pcu_contig_12103-snap-gene-0.1-mRNA-1	0	358.482	0	183.227	142.683	172.256	SUMO-activating enzyme (SAE)
maker-pcu_contig_18239-snap-gene-0.0-mRNA-1	0	0	0	183.149	0	241.599	Glucanase inhibitor protein 2
maker-pcu_contig_2394-fgenesh-gene-0.0-mRNA-1	0	143.431	139.354	183.107	150.904	157.563	Threonyl-tRNA synthetase
maker-pcu_contig_1166-fgenesh-gene-0.1-mRNA-1	0	0	217.851	183.065	125.299	105.106	Conserved gene of unknown function
maker-pcu_contig_762-fgenesh-gene-0.1-mRNA-1	0	158.37	122.275	182.856	171.13	162.452	26S protease regulatory subunit 6A-A
maker-pcu_contig_41-fgenesh-gene-0.3-mRNA-1	0	0	0	182.582	0	0	Conserved gene of unknown function
maker-pcu_contig_2271-fgenesh-gene-0.0-mRNA-1	0	141.475	0	182.116	113.824	112.283	Eukaryotic translation initiation factor 2 subunit alpha
maker-pcu_contig_236-snap-gene-0.16-mRNA-1	0	75.6896	116.878	181.997	0	21.7164	Conserved gene of unknown function
maker-pcu_contig_1778-snap-gene-0.2-mRNA-1	0	160.685	0	181.765	93.0266	148.666	Serine/threonine-protein phosphatase
maker-pcu_contig_231-snap-gene-0.31-mRNA-1	0	0	0	181.622	0	230.507	NADH dehydrogenase
maker-pcu_contig_2632-fgenesh-gene-0.1-mRNA-1	0	0	0	181.547	0	55.6552	50S ribosomal protein L19
maker-pcu_contig_24982-snap-gene-0.0-mRNA-1	0	0	250.493	181.286	0	16.5622	Glucanase inhibitor protein 2
maker-pcu_contig_192-snap-gene-0.13-mRNA-1	0	146.807	128.928	180.874	170.855	180.269	Ubiquitin-activating enzyme E1
maker-pcu_contig_3132-fgenesh-gene-0.0-mRNA-1	0	212.376	0	180.766	138.321	135.104	NADH dehydrogenase [ubiquinone] 1 beta subcomplex subunit 9
maker-pcu_contig_1536-snap-gene-0.6-mRNA-1	0	171.247	358.003	180.319	96.6624	82.0265	C protein immunoglobulin-A-binding beta antigen
maker-pcu_contig_22924-fgenesh-gene-0.0-mRNA-1	0	0	0	179.957	0	158.299	Signal peptidase complex catalytic subunit SEC11A
maker-pcu_contig_449-snap-gene-0.5-mRNA-1	0	0	0	179.613	113.77	93.7165	Conserved gene of unknown function
maker-pcu_contig_2462-fgenesh-gene-0.1-mRNA-1	0	185.443	0	179.463	136.365	195.597	Peroxisomal multifunctional enzyme
maker-pcu_contig_2450-snap-gene-0.2-mRNA-1	0	0	229.853	179.401	0	118.71	Conserved gene of unknown function
maker-pcu_contig_1939-snap-gene-0.2-mRNA-1	0	303.671	335.736	179.321	243.424	229.274	Conserved gene of unknown function
maker-pcu_contig_1298-snap-gene-0.2-mRNA-1	0	426.099	185.581	179.234	172.254	113.037	L-aspartate oxidase
maker-pcu_contig_122-snap-gene-0.13-mRNA-1	0	196.188	0	178.801	80.702	47.4621	Serine protease family S01A
maker-pcu_contig_51-snap-gene-0.19-mRNA-1	0	242.315	136.577	178.696	300.169	311.247	Beta-glucosidase
maker-pcu_contig_483-fgenesh-gene-0.2-mRNA-1	0	168.107	0	178.478	133.291	190.862	Phosphoenolpyruvate carboxykinase [ATP]
maker-pcu_contig_7338-snap-gene-0.1-mRNA-1	0	0	0	178.432	244.662	232.45	Elongation of very long chain fatty acids protein
maker-pcu_contig_23106-snap-gene-0.2-mRNA-1	0	0	0	178.23	150.882	129.358	Gene of unknown function
maker-pcu_contig_167-fgenesh-gene-0.0-mRNA-1	0	58.9401	0	178.182	104.196	131.866	Eukaryotic translation initiation factor 3 subunit C
maker-pcu_contig_21363-snap-gene-0.1-mRNA-1	0	0	0	178.143	0	0	Glucanase inhibitor protein 1
maker-pcu_contig_17-fgenesh-gene-0.13-mRNA-1	0	0	0	177.26	0	114.986	Conserved gene of unknown function
maker-pcu_contig_345-fgenesh-gene-0.0-mRNA-1	0	205.32	0	177.221	174.425	206.339	Proteasomal ubiquitin receptor ADRM1
maker-pcu_contig_240-snap-gene-0.6-mRNA-1	0	198.286	211.976	177.207	313.077	408.448	GTP cyclohydrolase II domain protein
maker-pcu_contig_532-snap-gene-0.3-mRNA-1	0	118.072	131.133	177.105	103.816	155.776	Dihydrolipoyllysine-residue succinyltransferase component of 2-oxoglutarate dehydrogenase complex
maker-pcu_contig_605-snap-gene-0.5-mRNA-1	0	305.234	0	176.925	204.323	77.8916	Mitochondrial Carrier (MC) Family
maker-pcu_contig_1036-snap-gene-0.4-mRNA-1	0	127.181	0	176.925	115.967	76.6746	Conserved gene of unknown function
maker-pcu_contig_416-fgenesh-gene-0.2-mRNA-1	0	0	0	176.607	0	231.259	Mitochondrial complex I subunit NDUFS6
maker-pcu_contig_435-fgenesh-gene-0.1-mRNA-1	0	755.613	0	176.499	872.42	1543.15	Conserved gene of unknown function
maker-pcu_contig_51-snap-gene-0.21-mRNA-1	0	0	611.015	176.018	223.353	157.957	Conserved gene of unknown function
maker-pcu_contig_1909-snap-gene-0.3-mRNA-1	0	213.307	514.539	175.888	229.727	354.329	Conserved gene of unknown function
maker-pcu_contig_4559-snap-gene-0.1-mRNA-1	0	0	230.694	175.605	0	36.8574	Neuroguidin
maker-pcu_contig_23492-fgenesh-gene-0.0-mRNA-1	0	0	0	175.484	175.326	219.49	Callose synthase
maker-pcu_contig_412-snap-gene-0.10-mRNA-1	0	195.205	0	175.098	193.734	178.85	Aldose 1-epimerase
maker-pcu_contig_7631-fgenesh-gene-0.0-mRNA-1	0	311.344	0	174.997	251.726	254.489	Carbohydrate esterase
maker-pcu_contig_2986-snap-gene-0.3-mRNA-1	0	0	0	174.835	111.911	191.88	Protein phosphatase 2A regulatory B subunit
maker-pcu_contig_7192-snap-gene-0.1-mRNA-1	0	177.238	0	174.613	76.9571	39.0581	Conserved gene of unknown function
maker-pcu_contig_857-snap-gene-0.6-mRNA-1	0	143.757	180.609	174.279	223.27	206.126	Ubiquitin carboxyl-terminal hydrolase
maker-pcu_contig_322-snap-gene-0.16-mRNA-1	0	152.937	353.543	173.849	160.906	240.087	Conserved gene of unknown function
maker-pcu_contig_2814-snap-gene-0.1-mRNA-1	0	418.537	718.842	173.659	315.458	310.925	Gene of unknown function
maker-pcu_contig_72-snap-gene-0.17-mRNA-1	0	0	0	173.277	0	61.9024	Mitochondrial ribosomal protein L51/S25/CI-B8 family protein
maker-pcu_contig_15672-snap-gene-0.0-mRNA-1	0	0	0	173.264	0	0	Glucanase inhibitor protein 1
maker-pcu_contig_1632-snap-gene-0.1-mRNA-1	0	133.477	0	173.155	150.159	71.5099	Nucleolin
maker-pcu_contig_3102-snap-gene-0.5-mRNA-1	0	245.981	153.048	173.092	267.014	318.161	Peroxiredoxin-4
maker-pcu_contig_1991-fgenesh-gene-0.3-mRNA-1	0	201.696	230.596	173.088	180.628	264.877	Argininosuccinate lyase
maker-pcu_contig_2932-snap-gene-0.2-mRNA-1	0	296.668	0	173.034	213.825	268.594	Zinc finger FYVE domain containing protein 28
maker-pcu_contig_265-snap-gene-0.9-mRNA-1	0	83.2113	54.0354	172.947	193.298	126.473	Callose synthase
maker-pcu_contig_1844-snap-gene-0.1-mRNA-1	0	173.346	190.256	172.821	478.701	498.36	GPI-anchored serine rich tenascin-like glycoprotein
maker-pcu_contig_623-snap-gene-0.9-mRNA-1	0	0	0	172.55	141.972	227.104	NADH dehydrogenase [ubiquinone] 1 alpha subcomplex subunit
maker-pcu_contig_246-fgenesh-gene-0.1-mRNA-1	0	0	189.406	172.377	90.4697	86.8155	Microtubule-associated protein futsch
maker-pcu_contig_264-snap-gene-0.7-mRNA-1	0	69.2398	108.563	172.279	123.263	97.1779	Isoleucyl-tRNA synthetase
maker-pcu_contig_113-snap-gene-0.16-mRNA-1	0	140.055	100.076	172.231	202.391	221.88	Coatomer protein complex
maker-pcu_contig_1353-snap-gene-0.6-mRNA-1	0	154.667	104.787	171.837	194.008	253.821	ZZ-type zinc finger-containing protein
maker-pcu_contig_70-snap-gene-0.7-mRNA-1	0	198.928	110.9	171.743	302.313	314.942	Cellulose synthase 2
maker-pcu_contig_5404-snap-gene-0.1-mRNA-1	0	179.727	187.866	171.656	152.174	132.364	Mucin
maker-pcu_contig_1005-snap-gene-0.5-mRNA-1	0	280.473	238.204	171.649	210.074	274.331	Rab8 family GTPase
maker-pcu_contig_295-snap-gene-0.8-mRNA-1	0	175.039	228.708	171.637	280.625	212.995	Transmembrane emp24 domain-containing protein 10
maker-pcu_contig_7062-snap-gene-0.0-mRNA-1	0	297.812	186.103	171.626	278.299	279.259	Calcyphosin
maker-pcu_contig_485-fgenesh-gene-0.2-mRNA-1	0	190.854	0	171.59	87.7439	187.125	Triosephosphate isomerase
maker-pcu_contig_1935-snap-gene-0.3-mRNA-1	0	194.465	427.333	170.976	149.684	191.617	THO complex 3
maker-pcu_contig_1612-snap-gene-0.0-mRNA-1	0	0	0	170.782	104.713	217.714	Conserved gene of unknown function
maker-pcu_contig_2796-snap-gene-0.1-mRNA-1	0	198.469	156.866	170.715	172.916	49.0546	Conserved gene of unknown function
maker-pcu_contig_1-snap-gene-0.34-mRNA-1	0	136.45	308.574	170.574	220.468	181.157	Bromodomain containing protein
maker-pcu_contig_15560-snap-gene-0.1-mRNA-1	0	0	0	170.364	0	87.2617	Ubiquinol:cytochrome c oxidoreductase biogenesis factor
maker-pcu_contig_1247-snap-gene-0.6-mRNA-1	0	221.336	109.427	170.337	206.495	154.419	UV excision repair protein RAD23
maker-pcu_contig_86-fgenesh-gene-0.6-mRNA-1	0	170.646	145.786	170.239	119.692	160.045	DnaJ domain containing protein
maker-pcu_contig_56-fgenesh-gene-0.0-mRNA-1	0	144.418	132.305	170.228	162.173	251.936	Transketolase
maker-pcu_contig_22860-snap-gene-0.1-mRNA-1	0	158.314	0	169.668	154.666	252.935	Cysteine protease family C01A
maker-pcu_contig_5022-snap-gene-0.1-mRNA-1	0	137.352	0	169.638	0	0	Mannosyl-oligosaccharide alpha-1,2-mannosidase
maker-pcu_contig_25537-snap-gene-0.1-mRNA-1	0	192.16	0	169.493	0	35.2234	Lysosomal thioesterase PPT2-B
maker-pcu_contig_1642-fgenesh-gene-0.0-mRNA-1	0	0	0	169.404	141.875	181.227	Nucleosome/chromatin assembly factor group
maker-pcu_contig_91-fgenesh-gene-0.8-mRNA-1	0	103.361	120.836	168.701	131.096	115.439	Anthranilate synthase component I
maker-pcu_contig_157-snap-gene-0.15-mRNA-1	0	220.447	0	168.295	138.056	143.613	Protein phosphatase 2c
maker-pcu_contig_8129-snap-gene-0.1-mRNA-1	0	713.592	262.98	168.236	297.926	761.814	Conserved gene of unknown function
maker-pcu_contig_1430-snap-gene-0.5-mRNA-1	0	129.691	135.564	168.191	173.16	185.093	H-or Na-translocating F-type, V-type and A-type ATPase (F-ATPase) Superfamily
maker-pcu_contig_36-snap-gene-0.16-mRNA-1	0	446.577	223.808	167.981	199.217	406.212	Homogentisate 1,2-dioxygenase
maker-pcu_contig_813-snap-gene-0.6-mRNA-1	0	89.5654	226.74	167.912	102.085	73.8454	Lysophospholipid acyltransferase
maker-pcu_contig_108-fgenesh-gene-0.2-mRNA-1	0	246.248	0	167.854	0	165.694	Atoep16-3
maker-pcu_contig_2153-snap-gene-0.6-mRNA-1	0	0	0	167.626	199.217	176.5	Conserved gene of unknown function
maker-pcu_contig_9220-snap-gene-0.1-mRNA-1	0	140.384	111.651	167.601	123.236	147.936	Carbohydrate-binding protein
maker-pcu_contig_455-snap-gene-0.7-mRNA-1	0	89.2998	58.3399	167.498	185.669	144.182	Ribonucleoside-diphosphate reductase
maker-pcu_contig_1735-snap-gene-0.2-mRNA-1	0	206.953	0	167.315	292.044	238.428	Neuron derived neurotrophic factor
maker-pcu_contig_5724-snap-gene-0.2-mRNA-1	0	233.303	0	167.293	0	26.6598	Whole genome shotgun sequence assembly, scaffold_94
maker-pcu_contig_575-fgenesh-gene-0.1-mRNA-1	0	159.039	90.0472	167.084	107.035	91.2075	Amidophosphoribosyltransferase
maker-pcu_contig_1083-snap-gene-0.5-mRNA-1	0	0	158.547	166.971	0	141.276	Ribulose-phosphate 3-epimerase
maker-pcu_contig_4702-snap-gene-0.1-mRNA-1	0	96.4196	75.5895	166.522	104.664	71.3686	Peptidase dimerisation domain containing protein
maker-pcu_contig_222-fgenesh-gene-0.10-mRNA-1	0	238.402	0	166.271	155.272	175.072	Gamma-secretase subunit PEN-2
maker-pcu_contig_963-fgenesh-gene-0.2-mRNA-1	0	136.199	0	166.095	157.321	317.606	Phosphoglycerate kinase
maker-pcu_contig_939-fgenesh-gene-0.2-mRNA-1	0	347.386	0	165.919	0	240.662	CSH
maker-pcu_contig_32-snap-gene-0.48-mRNA-1	0	0	0	165.87	0	108.081	50S ribosomal protein L15
maker-pcu_contig_51-snap-gene-0.16-mRNA-1	0	100.432	185.902	165.858	111.745	112.147	Serine protease family S33
maker-pcu_contig_7556-fgenesh-gene-0.0-mRNA-1	0	0	0	165.824	122.033	232.673	Alcohol dehydrogenase
maker-pcu_contig_21145-snap-gene-0.0-mRNA-1	0	166.735	0	165.647	0	0	NPP1
maker-pcu_contig_2654-snap-gene-0.4-mRNA-1	0	73.974	191.902	165.568	126.923	63.7874	GK16278
maker-pcu_contig_719-snap-gene-0.2-mRNA-1	0	67.2026	182.369	165.548	161.61	160.823	PH domain containing protein
maker-pcu_contig_1083-snap-gene-0.9-mRNA-1	0	0	0	165.478	0	48.3993	MRNA turnover protein 4
maker-pcu_contig_4588-fgenesh-gene-0.0-mRNA-1	0	155.065	202.609	165.36	0	34.4712	Vimentin beta
maker-pcu_contig_1582-snap-gene-0.2-mRNA-1	0	68.4573	106.484	164.663	119.959	110.385	UDP-glucose:glycoprotein glucosyltransferase
maker-pcu_contig_1042-fgenesh-gene-0.1-mRNA-1	0	0	0	164.497	0	97.0061	Mitochondrial Protein Translocase (MPT) Family
maker-pcu_contig_7217-snap-gene-0.3-mRNA-1	0	0	0	164.199	133.388	201.02	Glutamine-rich cytoplasmic protein (Eurofung)
maker-pcu_contig_1344-snap-gene-0.3-mRNA-1	0	148.432	134.916	164.103	256.397	368.414	Tristetraproline
maker-pcu_contig_2588-snap-gene-0.3-mRNA-1	0	178.802	0	164.011	248.436	551.659	Conserved gene of unknown function
maker-pcu_contig_120-snap-gene-0.9-mRNA-1	0	246.373	0	163.993	192.556	160.103	WS041
maker-pcu_contig_674-fgenesh-gene-0.3-mRNA-1	0	213.307	0	163.625	236.177	147.674	DNA-directed RNA polymerase I, II, and III subunit RPABC2
maker-pcu_contig_1100-snap-gene-0.3-mRNA-1	0	82.5005	134.745	163.491	123.586	79.2154	Nucleolar GTP-binding protein 1
maker-pcu_contig_434-snap-gene-0.6-mRNA-1	0	153.075	161.912	163.162	156.669	218.584	Glycogen Synthase Kinase 3 beta
maker-pcu_contig_20507-fgenesh-gene-0.0-mRNA-1	0	219.025	0	162.82	0	45.8871	CDS Pa_1_8450
maker-pcu_contig_30649-snap-gene-0.0-mRNA-1	0	0	0	162.497	0	430.181	Aldose 1-epimerase
maker-pcu_contig_188-snap-gene-0.17-mRNA-1	0	0	173.338	162.333	95.0439	122.09	SR protein factor
maker-pcu_contig_699-snap-gene-0.5-mRNA-1	0	120.451	64.8047	161.978	177.667	199.992	Prolyl endopeptidase
maker-pcu_contig_683-fgenesh-gene-0.0-mRNA-1	0	0	0	161.801	0	83.6617	Eukaryotic translation initiation factor 3
maker-pcu_contig_957-snap-gene-0.12-mRNA-1	0	75.6597	112.038	161.523	144.547	76.6488	GlcNac transferase
maker-pcu_contig_224-snap-gene-0.12-mRNA-1	0	124.172	0	161.409	121.311	126.674	Actin
maker-pcu_contig_56-fgenesh-gene-0.2-mRNA-1	0	157.353	105.435	161.388	120.879	130.722	Glycyl-tRNA synthetase
maker-pcu_contig_1090-fgenesh-gene-0.1-mRNA-1	0	181.436	160.02	161.362	144.759	151.483	26S proteasome non-ATPase regulatory subunit 6
maker-pcu_contig_4534-snap-gene-0.2-mRNA-1	0	242.132	459.493	161.214	446.822	319.93	Leucine-rich repeat containing protein
maker-pcu_contig_65-snap-gene-0.8-mRNA-1	0	158.515	117.553	161.101	153.467	175.605	Endomembrane protein 70
maker-pcu_contig_2421-snap-gene-0.2-mRNA-1	0	94.252	156.737	161.101	92.0801	119.846	Atlastin
maker-pcu_contig_1483-snap-gene-0.2-mRNA-1	0	252.998	0	161.023	139.428	178.859	Exoglucanase 1
maker-pcu_contig_13266-snap-gene-0.0-mRNA-1	0	97.931	0	160.971	255.131	151.332	Crinkler (CRN) family protein
maker-pcu_contig_101-snap-gene-0.15-mRNA-1	0	246.305	292.567	160.373	145.836	54.9235	Conserved gene of unknown function
maker-pcu_contig_10757-snap-gene-0.0-mRNA-1	0	0	0	160.225	0	45.1892	Butyrate response factor 1
maker-pcu_contig_2283-snap-gene-0.1-mRNA-1	0	109.259	0	159.774	169.007	223.35	1-acyl-sn-glycerol-3-phosphate acyltransferase
maker-pcu_contig_112-fgenesh-gene-0.2-mRNA-1	0	254.834	179.29	159.706	210.66	239.29	Conserved gene of unknown function
maker-pcu_contig_9-snap-gene-0.31-mRNA-1	0	97.889	114.864	159.594	117.03	146.912	Conserved gene of unknown function
maker-pcu_contig_61-snap-gene-0.5-mRNA-1	0	172.461	297.038	159.551	234.861	263.245	Heat Shock transcription factor
maker-pcu_contig_1909-snap-gene-0.5-mRNA-1	0	0	335.988	159.485	203.889	186.348	Tyrosyl-DNA phosphodiesterase
maker-pcu_contig_2847-snap-gene-0.1-mRNA-1	0	0	0	159.471	0	27.2586	Ammonium Transporter (Amt) Family
maker-pcu_contig_294-snap-gene-0.6-mRNA-1	0	235.109	109.713	159.374	83.8556	103.544	Amino Acid/Auxin Permease (AAAP) Family
maker-pcu_contig_294-fgenesh-gene-0.5-mRNA-1	0	0	0	159.319	215.739	103.91	Ribosomal protein L7Ae/L30e/S12e/Gadd4
maker-pcu_contig_55-fgenesh-gene-0.5-mRNA-1	0	111.751	223.889	159.191	116.454	126.141	Myb-like DNA-binding protein
maker-pcu_contig_3281-snap-gene-0.1-mRNA-1	0	152.663	189.972	159.024	279.351	376.536	Conserved gene of unknown function
maker-pcu_contig_455-snap-gene-0.9-mRNA-1	0	143.629	0	158.781	134.218	90.4597	Dihydrolipoyllysine-residue acetyltransferase component of pyruvate dehydrogenase complex
maker-pcu_contig_2807-fgenesh-gene-0.0-mRNA-1	0	309.771	0	158.679	0	175.284	Qc-SNARE protein, SYP7-family
maker-pcu_contig_5979-snap-gene-0.1-mRNA-1	0	0	0	158.552	0	141.139	Epsin domain-containing protein
maker-pcu_contig_51-fgenesh-gene-0.13-mRNA-1	0	189.707	0	158.509	168.487	384.963	Transmembrane protein
maker-pcu_contig_681-snap-gene-0.14-mRNA-1	0	117.628	0	157.961	167.153	118.29	Pc13g06010 protein
maker-pcu_contig_3801-fgenesh-gene-0.0-mRNA-1	0	121.332	44.0371	157.512	153.658	184.457	T-complex protein 1 subunit zeta
maker-pcu_contig_14496-snap-gene-0.0-mRNA-1	0	0	0	157.444	0	55.062	Cysteine protease family C01A
maker-pcu_contig_4957-fgenesh-gene-0.0-mRNA-1	0	135.256	0	157.414	81.8002	73.5315	Mitochondrial Carrier (MC) Family
maker-pcu_contig_18518-snap-gene-0.0-mRNA-1	0	0	238.204	157.345	0	68.5827	Conserved gene of unknown function
maker-pcu_contig_2-snap-gene-0.43-mRNA-1	0	151.037	0	157.326	196.742	137.243	Protein kinase
maker-pcu_contig_755-fgenesh-gene-0.1-mRNA-1	0	203.958	120.352	157.27	269.962	234.991	Medium-chain specific acyl-CoA dehydrogenase, mitochondrial
maker-pcu_contig_27906-snap-gene-0.0-mRNA-1	0	0	0	157.038	0	38.7541	Conserved gene of unknown function
maker-pcu_contig_141-snap-gene-0.19-mRNA-1	0	120.474	83.6256	156.846	107.89	114.907	Nicastrin
maker-pcu_contig_573-snap-gene-0.7-mRNA-1	0	107.242	128.446	156.686	101.86	105.034	Phenylalanyl-tRNA synthetase beta chain
maker-pcu_contig_17-snap-gene-0.38-mRNA-1	0	125.638	153.569	156.507	97.6663	120.806	Myosin
maker-pcu_contig_11316-snap-gene-0.1-mRNA-1	0	0	0	156.366	0	81.5396	Glutamyl-tRNA synthetase
maker-pcu_contig_1481-fgenesh-gene-0.1-mRNA-1	0	136.574	0	156.3	102.294	129.308	Conserved gene of unknown function
maker-pcu_contig_360-fgenesh-gene-0.4-mRNA-1	0	83.3488	81.6781	156.235	118.749	77.6722	GMP synthase [glutamine-hydrolyzing]
maker-pcu_contig_548-snap-gene-0.6-mRNA-1	0	102.28	83.5247	156.045	212.336	168.706	Ornithine aminotransferase, mitochondrial
maker-pcu_contig_637-fgenesh-gene-0.0-mRNA-1	0	95.2053	127.851	155.794	89.5665	98.1066	Ran binding protein 7
maker-pcu_contig_7784-snap-gene-0.0-mRNA-1	0	127.95	96.5856	155.768	63.4953	70.4409	Protein H39E23.3, partially confirmed by transcript evidence
maker-pcu_contig_877-snap-gene-0.2-mRNA-1	0	209.547	0	155.186	111.665	135.408	Glycoside hydrolase
maker-pcu_contig_1104-fgenesh-gene-0.1-mRNA-1	0	0	183.658	155.186	83.9188	143.088	Conserved gene of unknown function
maker-pcu_contig_2311-snap-gene-0.1-mRNA-1	0	191.15	118.932	154.968	243.065	329.43	Conserved gene of unknown function
maker-pcu_contig_105-fgenesh-gene-0.5-mRNA-1	0	94.252	0	154.908	80.2749	134.189	Peroxisomal (S)-2-hydroxy-acid oxidase
maker-pcu_contig_345-fgenesh-gene-0.4-mRNA-1	0	95.4905	81.5795	154.869	160.267	184.714	Trifunctional enzyme subunit alpha
maker-pcu_contig_279-snap-gene-0.3-mRNA-1	0	87.0538	139.022	154.861	204.744	157.374	Conserved gene of unknown function
maker-pcu_contig_2154-fgenesh-gene-0.0-mRNA-1	0	117.962	0	154.377	54.8779	82.2421	Sideroflexin-1
maker-pcu_contig_10484-snap-gene-0.0-mRNA-1	0	0	207.401	154.239	167.346	144.645	Ring finger protein 123
maker-pcu_contig_204-snap-gene-0.12-mRNA-1	0	120.8	189.406	153.908	94.4129	118.069	Eukaryotic translation initiation factor 2 subunit beta
maker-pcu_contig_550-snap-gene-0.7-mRNA-1	0	0	187.537	153.736	63.9612	93.222	Heat shock protein DnaJ family protein
maker-pcu_contig_305-fgenesh-gene-0.2-mRNA-1	0	0	0	153.3	0	77.073	Conserved gene of unknown function
maker-pcu_contig_119-snap-gene-0.19-mRNA-1	0	181.767	126.171	153.061	77.6905	106.7	Sorting and assembly machinery component 50
maker-pcu_contig_1329-snap-gene-0.4-mRNA-1	0	176.436	183.07	152.996	84.4951	173.346	Calcyphosin
maker-pcu_contig_1828-snap-gene-0.3-mRNA-1	0	117.628	0	152.514	167.153	175.13	Conserved gene of unknown function
maker-pcu_contig_180-snap-gene-0.15-mRNA-1	0	215.831	172.338	152.425	109.334	177.116	SH3 domain-containing protein PJ696.02
maker-pcu_contig_144-snap-gene-0.15-mRNA-1	0	87.2247	0	152.078	137.967	84.8892	Drug/Metabolite Transporter (DMT) Superfamily
maker-pcu_contig_1599-snap-gene-0.4-mRNA-1	0	96.2669	125.783	151.949	106.588	85.7104	F-actin-capping protein subunit beta
maker-pcu_contig_1267-snap-gene-0.7-mRNA-1	0	0	0	151.533	70.031	55.7965	30S ribosomal protein S18
maker-pcu_contig_127-snap-gene-0.14-mRNA-1	0	102.242	141.357	151.463	117.695	120.496	Callose synthase
maker-pcu_contig_525-fgenesh-gene-0.2-mRNA-1	0	148.938	172.149	151.449	93.2731	142.107	Dihydrolipoyllysine-residue acetyltransferase component of pyruvate dehydrogenase complex
maker-pcu_contig_1271-snap-gene-0.4-mRNA-1	0	270.619	218.89	151.096	235.007	214.925	Maleylacetoacetate isomerase
maker-pcu_contig_2606-snap-gene-0.2-mRNA-1	0	0	0	151.096	109.11	120.432	Conserved gene of unknown function
maker-pcu_contig_2138-snap-gene-0.4-mRNA-1	0	181.409	172.385	151.069	247.046	221.319	26S proteasome non-ATPase regulatory subunit 7
maker-pcu_contig_657-fgenesh-gene-0.3-mRNA-1	0	129.447	0	150.879	178.538	174.033	Arg11
maker-pcu_contig_12646-snap-gene-0.1-mRNA-1	0	0	0	150.842	0	141.063	Protein RER1A
maker-pcu_contig_102-fgenesh-gene-0.0-mRNA-1	0	0	0	150.761	0	155.907	Conserved gene of unknown function
maker-pcu_contig_548-snap-gene-0.8-mRNA-1	0	0	0	150.761	0	54.3313	Conserved gene of unknown function
maker-pcu_contig_638-snap-gene-0.2-mRNA-1	0	190.224	0	150.717	0	21.2539	Conserved gene of unknown function
maker-pcu_contig_5-fgenesh-gene-0.13-mRNA-1	0	260.353	0	150.671	0	174.978	Actin-depolymerizing factor 7
maker-pcu_contig_29-snap-gene-0.17-mRNA-1	0	109.536	214.681	150.659	156.951	262.817	Conserved gene of unknown function
maker-pcu_contig_414-fgenesh-gene-0.2-mRNA-1	0	153.502	73.3783	150.269	165.815	175.963	AP-1 complex subunit gamma-1
maker-pcu_contig_158-snap-gene-0.16-mRNA-1	0	115.795	0	150.128	164.548	120.976	Phosphomannomutase
maker-pcu_contig_658-fgenesh-gene-0.0-mRNA-1	0	94.9493	0	149.866	61.8409	103.878	Adenylosuccinate synthetase
maker-pcu_contig_75-snap-gene-0.11-mRNA-1	0	110.032	227.633	149.373	107.496	155.349	High-affinity nickel transporter
maker-pcu_contig_576-snap-gene-0.0-mRNA-1	0	0	0	149.362	0	30.892	Calcineurin-like phosphoesterase
maker-pcu_contig_488-snap-gene-0.7-mRNA-1	0	55.7788	69.5682	149.356	170.086	119.108	Ubiquitin-activating enzyme E1
maker-pcu_contig_2395-snap-gene-0.5-mRNA-1	0	0	0	149.335	737.391	982.454	Major Facilitator Superfamily (MFS)
maker-pcu_contig_7548-snap-gene-0.0-mRNA-1	0	0	0	149.3	0	0	NPP1
maker-pcu_contig_12-snap-gene-0.11-mRNA-1	0	136.722	204.163	149.181	127.211	165.493	Conserved gene of unknown function
maker-pcu_contig_4188-snap-gene-0.3-mRNA-1	0	192.557	0	149.124	252.632	167.155	Gene of unknown function
maker-pcu_contig_4912-snap-gene-0.1-mRNA-1	0	117.332	89.4289	149.091	85.971	84.0982	Cytochrome P450
maker-pcu_contig_664-fgenesh-gene-0.0-mRNA-1	0	0	0	149.065	0	61.826	Tetrahydrofolate dehydrogenase
maker-pcu_contig_13390-snap-gene-0.1-mRNA-1	0	0	0	149.057	244.637	239.301	TFIIH basal transcription factor complex helicase XPB subunit
maker-pcu_contig_353-snap-gene-0.5-mRNA-1	0	91.869	120.037	148.988	115.067	99.2281	Serine/threonine protein phosphatase 2A 59 kDa regulatory subunit B' gamma
maker-pcu_contig_1236-snap-gene-0.5-mRNA-1	0	0	93.4244	148.762	50.8028	84.8447	GM15668
maker-pcu_contig_4676-snap-gene-0.2-mRNA-1	0	216.511	355.263	148.722	318.102	214.787	Conserved gene of unknown function
maker-pcu_contig_4729-snap-gene-0.1-mRNA-1	0	161.124	309.21	148.722	318.102	214.787	Conserved gene of unknown function
maker-pcu_contig_27104-snap-gene-0.0-mRNA-1	0	218.09	0	148.53	142.043	73.3091	Hepatitis A virus cellular receptor 1
maker-pcu_contig_1478-snap-gene-0.4-mRNA-1	0	148.546	161.743	148.49	222.522	238.501	Solute carrier family, facilitated glucose transporter
maker-pcu_contig_830-snap-gene-0.4-mRNA-1	0	90.7835	160.982	148.404	71.7979	67.8985	Ribose-phosphate pyrophosphokinase
maker-pcu_contig_236-snap-gene-0.6-mRNA-1	0	142.936	124.508	148.387	236.616	196.441	V-type proton ATPase subunit H
maker-pcu_contig_13735-snap-gene-0.1-mRNA-1	0	330.971	0	148.327	276.18	270.021	C2 domain-containing protein
maker-pcu_contig_6670-snap-gene-0.1-mRNA-1	0	0	0	148.32	135.947	96.2787	Chitinase domain-containing protein 1
maker-pcu_contig_9342-snap-gene-0.1-mRNA-1	0	171.825	126.896	148.23	63.2538	20.3671	Endo-1,4-beta-xylanase
maker-pcu_contig_1011-fgenesh-gene-0.1-mRNA-1	0	0	0	147.908	156.037	272.378	Protein kinase
maker-pcu_contig_17304-snap-gene-0.1-mRNA-1	0	0	0	147.884	0	49.7754	Glycoside hydrolase
maker-pcu_contig_2-snap-gene-0.55-mRNA-1	0	162.906	155.326	147.672	220.805	286.493	Cathepsin, cysteine protease family C01A
maker-pcu_contig_491-snap-gene-0.5-mRNA-1	0	170.157	136.429	147.364	130.974	228.868	Croquemort-like mating protein
maker-pcu_contig_2632-snap-gene-0.3-mRNA-1	0	119.936	195.887	147.326	68.3504	145.43	Signal recognition particle
maker-pcu_contig_2030-snap-gene-0.1-mRNA-1	0	92.6662	74.2171	147.303	95.42	106.852	Fimbrin
maker-pcu_contig_254-fgenesh-gene-0.2-mRNA-1	0	71.2586	104.745	147.115	75.418	96.3886	Bifunctional purine biosynthesis protein PURH
maker-pcu_contig_1677-snap-gene-0.5-mRNA-1	0	0	0	146.873	169.751	41.4234	NPP1
maker-pcu_contig_334-snap-gene-0.11-mRNA-1	0	97.6587	0	146.873	134.844	150.58	Dynamin-2
maker-pcu_contig_9422-snap-gene-0.0-mRNA-1	0	0	83.683	146.578	31.2752	29.4034	Effector protein Avh121
maker-pcu_contig_252-fgenesh-gene-0.1-mRNA-1	0	0	0	146.47	0	76.2644	Gene of unknown function
maker-pcu_contig_338-snap-gene-0.4-mRNA-1	0	82.2076	193.344	146.424	74.959	57.8158	Conserved gene of unknown function
maker-pcu_contig_2680-snap-gene-0.2-mRNA-1	0	0	0	146.35	0	220.461	Conserved gene of unknown function
maker-pcu_contig_362-snap-gene-0.9-mRNA-1	0	188.922	111.669	146.301	158.202	176.654	Conserved gene of unknown function
maker-pcu_contig_225-snap-gene-0.9-mRNA-1	0	0	179.761	146.038	149.342	166.4	Short chain dehydrogenase
maker-pcu_contig_39-snap-gene-0.23-mRNA-1	0	195.161	237.998	145.925	228.796	168.366	Rab18 family GTPase
maker-pcu_contig_497-snap-gene-0.4-mRNA-1	0	116.435	128.73	145.896	105.002	99.012	Memo
maker-pcu_contig_4228-snap-gene-0.1-mRNA-1	0	59.2087	61.89	145.852	88.6946	75.0619	ATP-binding Cassette (ABC) Superfamily
maker-pcu_contig_98-snap-gene-0.24-mRNA-1	0	121.44	161.194	145.824	150.657	178.036	Myosin
maker-pcu_contig_1251-snap-gene-0.6-mRNA-1	0	84.9874	131.866	145.812	117.624	111.188	Myb-like DNA-binding protein
maker-pcu_contig_752-snap-gene-0.3-mRNA-1	0	0	0	145.776	127.329	190.424	Ferredoxin
maker-pcu_contig_1893-fgenesh-gene-0.1-mRNA-1	0	272.002	248.78	145.634	398.602	244.489	Transmembrane protein
maker-pcu_contig_313-fgenesh-gene-0.3-mRNA-1	0	112.699	124.599	145.612	146.803	155.56	Hydroxyacyl-coenzyme A dehydrogenase, mitochondrial
maker-pcu_contig_262-snap-gene-0.2-mRNA-1	0	95.3608	0	145.612	124.218	103.292	Conserved gene of unknown function
maker-pcu_contig_8820-snap-gene-0.1-mRNA-1	0	143.083	168.258	145.573	191.041	165.254	Conserved gene of unknown function
maker-pcu_contig_198-snap-gene-0.17-mRNA-1	0	268.632	144.977	145.494	182.568	209.36	DIP-1
maker-pcu_contig_964-fgenesh-gene-0.1-mRNA-1	0	110.721	0	145.365	66.1034	90.593	Phosphoribosylaminoimidazole carboxylase
maker-pcu_contig_1405-fgenesh-gene-0.0-mRNA-1	0	109.196	142.676	145.346	109.415	183.262	CCT motif family protein
maker-pcu_contig_1005-snap-gene-0.7-mRNA-1	0	455.855	0	145.316	213.397	313.53	Conserved gene of unknown function
maker-pcu_contig_141-snap-gene-0.24-mRNA-1	0	0	0	145.316	0	63.5256	Trafficking protein particle complex subunit
maker-pcu_contig_70-snap-gene-0.6-mRNA-1	0	128.559	67.1907	145.298	221.888	167.601	Protein transport Sec23/Sec24
maker-pcu_contig_122-fgenesh-gene-0.3-mRNA-1	0	110.556	91.7162	145.218	98.2932	116.84	Splicing factor 3B subunit 1
maker-pcu_contig_40-fgenesh-gene-0.6-mRNA-1	0	0	0	144.848	0	95.9145	Oxidoreductase htatip2
maker-pcu_contig_2279-fgenesh-gene-0.0-mRNA-1	0	0	0	144.804	257.525	261.376	GA17237
maker-pcu_contig_351-snap-gene-0.12-mRNA-1	0	0	0	144.719	168.813	119.047	Small nuclear ribonucleoprotein Sm D3
maker-pcu_contig_5541-snap-gene-0.2-mRNA-1	0	278.794	0	144.612	174.854	253.626	Transmembrane protein
maker-pcu_contig_166-fgenesh-gene-0.6-mRNA-1	0	0	108.406	144.273	144.099	105.326	Endo-1,3(4)-beta-glucanase
maker-pcu_contig_1171-snap-gene-0.7-mRNA-1	0	161.951	137.545	144.224	126.576	133.651	Mitochondrial Protein Translocase (MPT) Family
maker-pcu_contig_1269-snap-gene-0.3-mRNA-1	0	163.531	235.038	144.101	269.821	289.182	Methylmalonate semialdehyde dehydrogenase [acylating]
maker-pcu_contig_535-snap-gene-0.9-mRNA-1	0	153.983	152.909	144.076	116.336	146.638	Glutaredoxin
maker-pcu_contig_189-snap-gene-0.4-mRNA-1	0	0	0	144.066	0	62.7947	Conserved gene of unknown function
maker-pcu_contig_21602-snap-gene-0.0-mRNA-1	0	0	0	143.963	212.102	167.625	Glycoside hydrolase
maker-pcu_contig_21929-snap-gene-0.0-mRNA-1	0	171.818	140.848	143.931	0	30.8922	Glucanase inhibitor protein 2
maker-pcu_contig_70-snap-gene-0.8-mRNA-1	0	167.909	145.081	143.727	278.691	330.112	Cellulose synthase 1
maker-pcu_contig_4108-snap-gene-0.2-mRNA-1	0	214.075	0	143.687	101.402	204.72	Ca2 :Cation Antiporter (CaCA) Family
maker-pcu_contig_171-fgenesh-gene-0.1-mRNA-1	0	0	0	143.457	167.354	148.354	Nuclear transcription factor Y subunit
maker-pcu_contig_17-snap-gene-0.35-mRNA-1	0	152.274	153.048	143.249	0	121.204	Dolichol-phosphate mannosyltransferase
maker-pcu_contig_1245-snap-gene-0.6-mRNA-1	0	120.605	72.2258	143.041	248.744	216.842	Myb-like DNA-binding protein
maker-pcu_contig_966-snap-gene-0.3-mRNA-1	0	122.946	0	143.041	0	94.5534	Conserved gene of unknown function
maker-pcu_contig_2479-snap-gene-0.2-mRNA-1	0	213.307	234.702	142.991	168.176	240.359	Protein transporter Sec31A
maker-pcu_contig_2657-snap-gene-0.5-mRNA-1	0	207.205	122.476	142.932	89.9691	145.689	Zinc finger family protein
maker-pcu_contig_3177-snap-gene-0.1-mRNA-1	0	113.631	0	142.605	123.347	195.664	Conserved gene of unknown function
maker-pcu_contig_3012-snap-gene-0.2-mRNA-1	0	122.17	0	142.403	104.426	26.7752	Proteoglycan
maker-pcu_contig_422-snap-gene-0.5-mRNA-1	0	164.415	0	142.241	133.855	186.426	WD-repeat protein
maker-pcu_contig_464-fgenesh-gene-0.2-mRNA-1	0	190.878	145.002	142.119	92.5171	223.954	Glycoside hydrolase
maker-pcu_contig_3776-snap-gene-0.1-mRNA-1	0	149.391	62.9663	142.061	119.27	102.929	Cytoplasmic dynein intermediate chain
maker-pcu_contig_223-snap-gene-0.12-mRNA-1	0	93.1976	65.8231	141.984	101.713	108.229	K1324_HUMAN Isoform 2 of Q6UXG2 - Homo sapiens (Human)
maker-pcu_contig_658-fgenesh-gene-0.1-mRNA-1	0	0	0	141.808	0	127.984	Tubulin folding cofactor A
maker-pcu_contig_1823-snap-gene-0.4-mRNA-1	0	0	0	141.799	0	84.8394	Gene of unknown function
maker-pcu_contig_11-snap-gene-0.21-mRNA-1	0	59.747	91.0768	141.721	123.226	119.197	Cytochrome P450
maker-pcu_contig_747-fgenesh-gene-0.3-mRNA-1	0	0	193.182	141.655	107.624	133.589	RNA and export factor binding protein
maker-pcu_contig_12779-snap-gene-0.1-mRNA-1	0	0	0	141.558	83.6502	114.655	AP-1 complex subunit beta
maker-pcu_contig_1203-fgenesh-gene-0.2-mRNA-1	0	122.911	185.954	141.468	109.546	140.11	Phosphoglycerate mutase
maker-pcu_contig_71-snap-gene-0.20-mRNA-1	0	99.746	82.3129	141.44	177.799	222.036	Vacuolar amino acid transporter
maker-pcu_contig_77-fgenesh-gene-0.5-mRNA-1	0	227.91	207.158	141.286	180.708	311.667	Carbohydrate esterase
maker-pcu_contig_42-snap-gene-0.17-mRNA-1	0	284.294	138.218	141.228	146.407	247.524	Zinc finger protein 2
maker-pcu_contig_2173-fgenesh-gene-0.0-mRNA-1	0	0	162.361	141.137	161.864	199.028	Coatomer subunit epsilon
maker-pcu_contig_10-snap-gene-0.25-mRNA-1	0	161.192	0	140.796	119.983	150.566	Phosphoglycerate mutase
maker-pcu_contig_1249-snap-gene-0.5-mRNA-1	0	59.7203	170.249	140.761	109.616	105.866	DnaJ domain-containing protein
maker-pcu_contig_125-snap-gene-0.7-mRNA-1	0	95.0558	169.365	140.746	90.0513	133.973	N-carbamoylputrescine amidase
maker-pcu_contig_617-snap-gene-0.6-mRNA-1	0	144.51	0	140.653	85.5633	60.4485	Eukaryotic initiation factor 4E
maker-pcu_contig_138-snap-gene-0.8-mRNA-1	0	67.4349	0	140.625	0	11.6082	Bzip transcription factor
maker-pcu_contig_2588-fgenesh-gene-0.0-mRNA-1	0	105.585	127.346	140.525	132.246	166.693	Whole genome shotgun sequence assembly, scaffold_30, strain Mel28
maker-pcu_contig_2181-snap-gene-0.2-mRNA-1	0	80.9729	80.262	140.39	125.48	79.59	Eukaryotic translation initiation factor
maker-pcu_contig_40-snap-gene-0.17-mRNA-1	0	76.6615	86.8109	140.285	136.475	116.498	Conserved gene of unknown function
maker-pcu_contig_275-fgenesh-gene-0.1-mRNA-1	0	302.245	466.719	140.117	241.593	211.422	Transmembrane protein
maker-pcu_contig_25629-fgenesh-gene-0.0-mRNA-1	0	177.261	0	139.823	0	97.4278	Aldose 1-epimerase
maker-pcu_contig_467-snap-gene-0.4-mRNA-1	0	0	0	139.254	45.5436	136.208	GK16278
maker-pcu_contig_177-snap-gene-0.13-mRNA-1	0	141.378	0	139.16	79.8027	63.6093	Conserved gene of unknown function
maker-pcu_contig_2269-snap-gene-0.2-mRNA-1	0	0	0	139.097	85.0246	51.1701	Protein kinase
maker-pcu_contig_7874-fgenesh-gene-0.0-mRNA-1	0	0	0	139.097	0	117.691	Conserved gene of unknown function
maker-pcu_contig_77-fgenesh-gene-0.6-mRNA-1	0	200.515	150.845	139.038	122.681	170.798	Seryl-tRNA synthetase
maker-pcu_contig_1153-snap-gene-0.4-mRNA-1	0	147.789	0	139.012	111.064	120.886	Gamma-secretase subunit Aph-1
maker-pcu_contig_87-fgenesh-gene-0.3-mRNA-1	0	79.365	81.8676	138.919	92.4992	81.0523	Eukaryotic translation initiation factor 3 subunit
maker-pcu_contig_567-fgenesh-gene-0.0-mRNA-1	0	134.216	106.473	138.868	103.025	90.0124	2-isopropylmalate synthase
maker-pcu_contig_239-snap-gene-0.14-mRNA-1	0	0	0	138.621	0	100.999	Zgc:66282
maker-pcu_contig_630-fgenesh-gene-0.3-mRNA-1	0	0	0	138.551	0	63.943	Conserved gene of unknown function
maker-pcu_contig_39-fgenesh-gene-0.5-mRNA-1	0	61.6792	0	138.474	66.9532	70.004	Tryptophanyl-tRNA synthetase
maker-pcu_contig_9720-snap-gene-0.0-mRNA-1	0	634.554	384.945	138.362	98.4018	15.1757	Glycolate oxidase
maker-pcu_contig_586-fgenesh-gene-0.3-mRNA-1	0	115.795	0	138.357	105.585	108.762	Cysteine desulfurase 1, mitochondrial
maker-pcu_contig_736-snap-gene-0.1-mRNA-1	0	129.093	0	138.233	0	81.8721	Conserved gene of unknown function
maker-pcu_contig_1-snap-gene-0.37-mRNA-1	0	0	0	138.193	128.019	130.366	Conserved gene of unknown function
maker-pcu_contig_7-snap-gene-0.22-mRNA-1	0	102.603	287.277	137.951	157.519	153.526	NAD-dependent epimerase/dehydratase family protein
maker-pcu_contig_1038-snap-gene-0.6-mRNA-1	0	85.7637	104.241	137.722	151.986	116.528	Conserved gene of unknown function
maker-pcu_contig_30-snap-gene-0.29-mRNA-1	0	153.277	117.808	137.693	135.064	188.994	Uricase
maker-pcu_contig_197-snap-gene-0.14-mRNA-1	0	116.944	0	137.577	333.226	155.207	Ribonucleoside-diphosphate reductase small chain
maker-pcu_contig_21363-snap-gene-0.0-mRNA-1	0	0	0	137.498	0	0	Glucanase inhibitor protein 1
maker-pcu_contig_1180-snap-gene-0.3-mRNA-1	0	181.975	163.042	137.433	125.293	246.73	Conserved gene of unknown function
maker-pcu_contig_411-snap-gene-0.6-mRNA-1	0	124.933	111.002	137.166	107.408	176.235	ADP-dependent glucokinase
maker-pcu_contig_4688-snap-gene-0.1-mRNA-1	0	116.232	0	136.874	79.6869	92.999	Myosin
maker-pcu_contig_162-fgenesh-gene-0.1-mRNA-1	0	0	0	136.431	173.905	137.424	Protein dpy-30 homolog
maker-pcu_contig_26-snap-gene-0.24-mRNA-1	0	66.034	107.851	136.312	319.874	266.749	Adherance factor
maker-pcu_contig_693-fgenesh-gene-0.1-mRNA-1	0	167.012	334.604	136.136	210.3	387.148	P11915 Nonspecific lipid-transfer protein
maker-pcu_contig_32988-snap-gene-0.0-mRNA-1	0	0	0	136.109	0	0	Necrosis and ethylene-inducing protein 1
maker-pcu_contig_935-snap-gene-0.4-mRNA-1	0	100.937	0	136.04	148.631	226.436	Lupus La ribonucleoprotein
maker-pcu_contig_1851-snap-gene-0.3-mRNA-1	0	0	0	135.755	32.9954	38.9479	Ribosomal RNA methyltransferase nop2
maker-pcu_contig_179-snap-gene-0.19-mRNA-1	0	0	0	135.75	0	92.338	Conserved gene of unknown function
maker-pcu_contig_706-fgenesh-gene-0.0-mRNA-1	0	0	0	135.203	0	85.7975	Surfeit locus protein 5 family protein
maker-pcu_contig_10084-snap-gene-0.1-mRNA-1	0	0	0	135.184	0	52.1734	DNA polymerase beta
maker-pcu_contig_767-fgenesh-gene-0.3-mRNA-1	0	0	0	135.035	0	96.9431	Conserved gene of unknown function
maker-pcu_contig_630-snap-gene-0.4-mRNA-1	0	160.508	225.854	134.988	116.602	108.017	AP-4 complex subunit mu-1
maker-pcu_contig_7917-snap-gene-0.1-mRNA-1	0	0	0	134.655	107.169	113.933	Endoplasmic reticulum-Golgi intermediate compartment protein
maker-pcu_contig_599-snap-gene-0.6-mRNA-1	0	105.989	118.703	134.561	144.637	129.033	FACT complex subunit SPT16
maker-pcu_contig_1159-snap-gene-0.4-mRNA-1	0	97.3237	145.33	134.37	144.885	135.632	Conserved gene of unknown function
maker-pcu_contig_5647-fgenesh-gene-0.0-mRNA-1	0	0	0	134.344	0	126.3	Conserved gene of unknown function
maker-pcu_contig_2327-fgenesh-gene-0.0-mRNA-1	0	135.597	0	134.143	191.349	135.118	Protein W09D10.1, confirmed by transcript evidence
maker-pcu_contig_1935-snap-gene-0.5-mRNA-1	0	151.582	229.331	133.969	187.06	143.121	TPR Domain containing protein
maker-pcu_contig_1203-snap-gene-0.5-mRNA-1	0	0	0	133.654	72.3186	94.2382	Conserved gene of unknown function
maker-pcu_contig_196-snap-gene-0.8-mRNA-1	0	0	0	133.582	0	113.025	Prefoldin subunit
maker-pcu_contig_18468-snap-gene-0.1-mRNA-1	0	0	0	133.52	0	41.4234	Conserved gene of unknown function
maker-pcu_contig_133-snap-gene-0.18-mRNA-1	0	107.627	123.048	133.432	205.913	326.149	Protein Y54E5A.7, partially confirmed by transcript evidence
maker-pcu_contig_1550-snap-gene-0.2-mRNA-1	0	108.187	0	133.405	200.547	183.952	Pirin
maker-pcu_contig_2011-snap-gene-0.2-mRNA-1	0	247.577	116.455	133.39	122.548	134.157	Conserved gene of unknown function
maker-pcu_contig_456-snap-gene-0.9-mRNA-1	0	96.5782	99.1492	133.338	58.4088	67.2953	Death-associated protein 3
maker-pcu_contig_1223-fgenesh-gene-0.0-mRNA-1	0	72.7665	132.429	133.298	170.954	172.713	Lysosomal alpha-mannosidase
maker-pcu_contig_3271-fgenesh-gene-0.0-mRNA-1	0	178.99	183.754	133.288	145.721	186.127	Conserved gene of unknown function
maker-pcu_contig_69-fgenesh-gene-0.0-mRNA-1	0	137.384	0	133.111	0	82.9879	DNA-directed RNA polymerase I, II, and III subunit RPABC1
maker-pcu_contig_199-snap-gene-0.9-mRNA-1	0	0	0	133.061	0	79.7474	3-ketoacyl-CoA reductase
maker-pcu_contig_5461-snap-gene-0.1-mRNA-1	0	40.1162	94.8934	132.84	147.466	140.267	Vacuolar protein sorting-associated protein
maker-pcu_contig_129-fgenesh-gene-0.4-mRNA-1	0	97.3237	116.264	132.75	130.397	87.6264	Mitochondrial import receptor subunit TOM70
maker-pcu_contig_84-snap-gene-0.18-mRNA-1	0	189.745	139.456	132.659	115.858	80.7817	Carbohydrate-binding protein
maker-pcu_contig_11506-snap-gene-0.1-mRNA-1	0	0	0	132.511	103.944	152.16	Protein MYG1
maker-pcu_contig_232-fgenesh-gene-0.0-mRNA-1	0	157.444	0	132.481	109.616	168.14	Cystathionine beta-synthase
maker-pcu_contig_32147-snap-gene-0.0-mRNA-1	0	0	337.291	132.233	0	119.342	Cytochrome P450
maker-pcu_contig_30079-snap-gene-0.0-mRNA-1	0	0	0	132.233	0	0	Necrosis-inducing
maker-pcu_contig_530-snap-gene-0.8-mRNA-1	0	0	0	132.02	0	65.1604	Polyadenylate-binding protein 2
maker-pcu_contig_105-fgenesh-gene-0.2-mRNA-1	0	90.3558	88.5447	131.98	88.2737	76.0649	Methionyl-tRNA synthetase
maker-pcu_contig_87-snap-gene-0.22-mRNA-1	0	279.506	0	131.95	224.053	248.097	14 kDa zinc-binding protein
maker-pcu_contig_410-snap-gene-0.11-mRNA-1	0	178.147	126.964	131.862	163.493	145.272	Protein kinase
maker-pcu_contig_588-snap-gene-0.4-mRNA-1	0	0	0	131.764	106.294	121.266	Isochorismatase
maker-pcu_contig_2620-snap-gene-0.2-mRNA-1	0	87.9988	83.0411	131.697	156.021	161.188	Lysosomal Pro-X carboxypeptidase
maker-pcu_contig_1725-snap-gene-0.3-mRNA-1	0	0	0	131.598	0	39.7665	Zinc finger protein 2
maker-pcu_contig_9-fgenesh-gene-0.10-mRNA-1	0	0	88.4312	131.485	82.9746	84.4361	Cysteinyl-tRNA synthetase
maker-pcu_contig_448-snap-gene-0.11-mRNA-1	0	113.583	0	131.472	134.503	117.172	3-hydroxyacyl-CoA dehydrogenase
maker-pcu_contig_10758-snap-gene-0.1-mRNA-1	0	0	629.379	131.418	248.792	400.537	TRNA(Ile)-lysidine synthase
maker-pcu_contig_247-snap-gene-0.11-mRNA-1	0	49.895	106.68	131.395	62.0394	39.6587	ATP-dependent RNA helicase
maker-pcu_contig_222-snap-gene-0.12-mRNA-1	0	0	0	131.293	0	78.8367	30S ribosomal protein S9
maker-pcu_contig_16879-snap-gene-0.0-mRNA-1	0	0	0	131.147	0	0	Necrosis-inducing
maker-pcu_contig_268-fgenesh-gene-0.1-mRNA-1	0	0	0	130.969	0	107.12	Histone H2B
maker-pcu_contig_1059-fgenesh-gene-0.1-mRNA-1	0	0	0	130.969	0	99.7328	50S ribosomal protein L20
maker-pcu_contig_94-fgenesh-gene-0.0-mRNA-1	0	0	0	130.868	350.258	370.214	DnaJ (Hsp40) homolog, subfamily B, member 1
maker-pcu_contig_8356-snap-gene-0.0-mRNA-1	0	0	152.388	130.728	0	55.311	Conserved gene of unknown function
maker-pcu_contig_721-snap-gene-0.3-mRNA-1	0	0	0	130.726	153.224	115.217	Conserved gene of unknown function
maker-pcu_contig_399-fgenesh-gene-0.1-mRNA-1	0	210.209	197.756	130.316	131.434	195.82	Peptidase
maker-pcu_contig_1828-fgenesh-gene-0.0-mRNA-1	0	78.9147	77.333	130.258	80.7675	79.9343	Eukaryotic translation initiation factor 5B
maker-pcu_contig_963-snap-gene-0.4-mRNA-1	0	72.8445	0	129.994	163.152	128.493	Membrane protein YCR013c-yeast (ISS)
maker-pcu_contig_14864-snap-gene-0.0-mRNA-1	0	0	0	129.866	0	0	Secreted RxLR effector peptide protein
maker-pcu_contig_1203-snap-gene-0.4-mRNA-1	0	0	151.083	129.618	0	96.3776	Conserved gene of unknown function
maker-pcu_contig_4768-snap-gene-0.3-mRNA-1	0	187.94	79.2142	129.477	90.8174	150.416	Methylcrotonoyl-CoA carboxylase beta chain, mitochondrial
maker-pcu_contig_37-snap-gene-0.20-mRNA-1	0	100.165	0	129.371	466.702	180.225	MID
maker-pcu_contig_7026-snap-gene-0.1-mRNA-1	0	136.23	444.997	128.823	101.402	97.8191	Suppressor of Ty 3 homolog
maker-pcu_contig_6464-fgenesh-gene-0.0-mRNA-1	0	252.644	0	128.681	123.411	208.683	Mitogen-activated protein kinase
maker-pcu_contig_941-snap-gene-0.3-mRNA-1	0	0	0	128.513	0	80.6754	WD domain-containing protein
maker-pcu_contig_1946-snap-gene-0.3-mRNA-1	0	0	0	128.278	134.872	163.869	Protein phosphatase inhibitor 2
maker-pcu_contig_2523-fgenesh-gene-0.0-mRNA-1	0	104.544	0	127.627	158.877	235.97	3-ketoacyl-CoA thiolase, mitochondrial
maker-pcu_contig_1551-snap-gene-0.5-mRNA-1	0	143.041	0	127.564	147.509	109.647	Coated vesicle membrane protein-like isoform 2
maker-pcu_contig_20-snap-gene-0.37-mRNA-1	0	79.8401	134.125	127.487	131.239	57.7476	Conserved gene of unknown function
maker-pcu_contig_2345-fgenesh-gene-0.1-mRNA-1	0	182.907	0	127.441	0	102.299	Pre-mRNA-splicing factor SF2
maker-pcu_contig_12166-snap-gene-0.0-mRNA-1	0	178.147	0	127.376	139.233	248.907	Protein transporter Sec31A
maker-pcu_contig_135-fgenesh-gene-0.4-mRNA-1	0	0	0	127.303	91.9978	92.1015	Cytochrome c oxidase assembly protein COX11, mitochondrial
maker-pcu_contig_93-snap-gene-0.7-mRNA-1	0	97.4072	122.728	127.243	129.149	135.574	Kinesin heavy chain
maker-pcu_contig_11906-snap-gene-0.1-mRNA-1	0	74.364	0	127.208	180.494	314.664	Catalase
maker-pcu_contig_6087-snap-gene-0.1-mRNA-1	0	0	0	127.107	0	36.0884	Transglutaminase elicitor
maker-pcu_contig_338-fgenesh-gene-0.1-mRNA-1	0	0	0	127.069	118.386	78.1925	Ornithine decarboxylase 1
maker-pcu_contig_642-fgenesh-gene-0.1-mRNA-1	0	97.9537	127.987	126.958	146.735	110.93	Mitogen-activated protein kinase
maker-pcu_contig_2471-snap-gene-0.2-mRNA-1	0	48.9769	127.987	126.958	79.7471	76.528	Pumilio RNA binding protein
maker-pcu_contig_41-snap-gene-0.14-mRNA-1	0	0	0	126.881	114.352	58.94	Protein kinase
maker-pcu_contig_4465-snap-gene-0.2-mRNA-1	0	0	451.062	126.753	170.879	133.066	Gene of unknown function
maker-pcu_contig_3791-snap-gene-0.2-mRNA-1	0	0	0	126.728	69.8988	112.165	Glutamyl-tRNA synthetase
maker-pcu_contig_515-snap-gene-0.9-mRNA-1	0	56.9986	86.8872	126.629	66.5128	80.6116	Phosphoribosylglycinamide synthetase
maker-pcu_contig_4990-fgenesh-gene-0.1-mRNA-1	0	0	0	126.162	2203.3	1558.54	Conserved gene of unknown function
maker-pcu_contig_91-snap-gene-0.20-mRNA-1	0	0	0	126.008	0	87.2314	Conserved gene of unknown function
maker-pcu_contig_448-fgenesh-gene-0.0-mRNA-1	0	106.072	0	125.983	92.1135	102.788	Carbon-nitrogen hydrolase
maker-pcu_contig_122-snap-gene-0.8-mRNA-1	0	0	0	125.891	808.547	902.41	Major Facilitator Superfamily (MFS)
maker-pcu_contig_6-snap-gene-0.35-mRNA-1	0	0	0	125.891	0	109.899	Conserved gene of unknown function
maker-pcu_contig_4990-fgenesh-gene-0.0-mRNA-1	0	0	159.768	125.78	2098.08	1683.75	Conserved gene of unknown function
maker-pcu_contig_1060-snap-gene-0.5-mRNA-1	0	0	0	125.73	160.79	168.438	Myosin
maker-pcu_contig_1230-snap-gene-0.4-mRNA-1	0	0	119.402	125.606	0	56.4183	Brix domain-containing protein 2
maker-pcu_contig_1329-snap-gene-0.7-mRNA-1	0	102.478	0	125.594	147.164	136.009	Altronate oxidoreductase
maker-pcu_contig_5637-snap-gene-0.1-mRNA-1	0	56.0376	0	125.583	107.346	129.397	Callose synthase
maker-pcu_contig_21483-snap-gene-0.1-mRNA-1	0	0	0	125.431	84.5432	112.997	AAA ATPase containing von Willebrand factor type A (VWA) domain
maker-pcu_contig_2959-fgenesh-gene-0.1-mRNA-1	0	0	0	125.379	136.187	130.837	Transmembrane protein
maker-pcu_contig_1790-snap-gene-0.4-mRNA-1	0	69.3331	90.5912	125.008	102.629	65.0893	Metalloprotease family M38
maker-pcu_contig_15-fgenesh-gene-0.7-mRNA-1	0	0	0	124.998	0	126.914	Macrophage migration inhibitory factor
maker-pcu_contig_25900-snap-gene-0.1-mRNA-1	0	0	0	124.949	0	139.193	Conserved gene of unknown function
maker-pcu_contig_333-fgenesh-gene-0.3-mRNA-1	0	95.575	136.772	124.899	62.2484	142.209	Lectin
maker-pcu_contig_7526-snap-gene-0.1-mRNA-1	0	67.6883	171.356	124.684	176.343	126.111	Chromosome segregation ATPase
maker-pcu_contig_605-fgenesh-gene-0.0-mRNA-1	0	0	0	124.448	57.974	113.436	Asparaginyl-tRNA synthetase
maker-pcu_contig_5722-snap-gene-0.2-mRNA-1	0	130.342	0	124.368	68.9752	144.982	Mitochondrial Carrier (MC) Family
maker-pcu_contig_70-snap-gene-0.12-mRNA-1	0	108.679	0	124.27	179.908	164.21	Acyl-CoA dehydrogenase family member 9, mitochondrial
maker-pcu_contig_20-fgenesh-gene-0.10-mRNA-1	0	0	0	124.118	0	84.0136	P18 component of aminoacyl-tRNA synthetase complex
maker-pcu_contig_1935-snap-gene-0.4-mRNA-1	0	168.931	413.862	124.108	231.839	250.207	Transmembrane protein
maker-pcu_contig_2138-fgenesh-gene-0.0-mRNA-1	0	53.2684	63.8008	124.072	80.9525	64.2581	Malic enzyme
maker-pcu_contig_1499-snap-gene-0.3-mRNA-1	0	192.113	444.105	124.05	192.498	261.869	Cystathionine beta-synthase
maker-pcu_contig_396-fgenesh-gene-0.1-mRNA-1	0	95.11	139.27	124.039	114.279	140.169	Vacuolar protein sorting-associated protein
maker-pcu_contig_643-snap-gene-0.9-mRNA-1	0	97.463	0	123.993	68.7679	38.4676	Splicing factor U2AF 35 kDa subunit
maker-pcu_contig_19483-snap-gene-0.0-mRNA-1	0	0	0	123.987	0	0	NPP1
maker-pcu_contig_323-fgenesh-gene-0.5-mRNA-1	0	0	0	123.868	0	80.3514	Conserved gene of unknown function
maker-pcu_contig_634-snap-gene-0.4-mRNA-1	0	110.431	0	123.767	143.849	141.214	Ribonuclease t2
maker-pcu_contig_173-snap-gene-0.17-mRNA-1	0	0	190.256	123.682	94.8369	104.649	Short chain dehydrogenase
maker-pcu_contig_392-snap-gene-0.6-mRNA-1	0	89.4948	150.344	123.535	74.9421	67.8492	Endoplasmic reticulum-Golgi intermediate compartment protein
maker-pcu_contig_562-snap-gene-0.4-mRNA-1	0	91.0993	161.542	123.351	114.429	144.438	Protein phosphatase 2A scaffold subunit
maker-pcu_contig_42-fgenesh-gene-0.3-mRNA-1	0	0	0	123.261	100.284	116.934	50S ribosomal protein L25
maker-pcu_contig_281-snap-gene-0.14-mRNA-1	0	92.9549	0	123.042	0	110.78	Stromal cell-derived factor 2
maker-pcu_contig_198-snap-gene-0.4-mRNA-1	0	67.9411	104.211	123.028	219.328	195.919	AP-2 complex subunit beta
maker-pcu_contig_21055-fgenesh-gene-0.0-mRNA-1	0	0	0	122.994	0	46.9288	Glucose transporter
maker-pcu_contig_1462-fgenesh-gene-0.2-mRNA-1	0	109.907	172.327	122.926	128.85	113.464	CUG-BP-and ETR-3-like factor
maker-pcu_contig_151-fgenesh-gene-0.0-mRNA-1	0	134.111	91.1199	122.718	118.792	274.581	Steroidogenic acute regulatory protein, mitochondrial
maker-pcu_contig_462-snap-gene-0.4-mRNA-1	0	52.9956	76.1689	122.458	88.0164	110.824	Protein transporter Sec24
maker-pcu_contig_541-snap-gene-0.5-mRNA-1	0	0	0	122.261	0	86.2054	Protein tyrosine phosphatase
maker-pcu_contig_698-snap-gene-0.8-mRNA-1	0	111.626	173.18	122.237	114.279	111.858	Methionine aminopeptidase
maker-pcu_contig_223-fgenesh-gene-0.1-mRNA-1	0	107.844	136.364	121.941	83.8337	76.2603	N-terminal acetyltransferase A complex subunit nat1
maker-pcu_contig_4736-snap-gene-0.1-mRNA-1	0	0	0	121.91	0	48.1363	Protein kinase
maker-pcu_contig_243-fgenesh-gene-0.0-mRNA-1	0	0	135.955	121.889	74.5466	118.078	PDGF associated protein
maker-pcu_contig_5177-fgenesh-gene-0.0-mRNA-1	0	152.8	130.837	121.884	237.535	962.173	Aldehyde dehydrogenase, mitochondrial
maker-pcu_contig_92-snap-gene-0.11-mRNA-1	0	108.179	100.962	121.879	201.306	82.0547	DNA binding protein
maker-pcu_contig_59-snap-gene-0.11-mRNA-1	0	103.437	159.724	121.868	73.4931	113.896	Splicing factor U2af large subunit
maker-pcu_contig_397-snap-gene-0.7-mRNA-1	0	0	97.6123	121.625	394.12	302.291	Conserved gene of unknown function
maker-pcu_contig_5959-snap-gene-0.1-mRNA-1	0	0	0	121.483	92.1135	137.051	Transmembrane protein
maker-pcu_contig_131-snap-gene-0.9-mRNA-1	0	87.4883	108.134	121.272	126.283	130.717	RAC family serine/threonine-protein kinase
maker-pcu_contig_421-fgenesh-gene-0.1-mRNA-1	0	84.8206	124.681	121.271	113.941	224.218	Major Facilitator Superfamily (MFS)
maker-pcu_contig_9-snap-gene-0.20-mRNA-1	0	122.93	0	121.184	90.0726	73.8691	Transcription factor
maker-pcu_contig_254-snap-gene-0.16-mRNA-1	0	72.1145	0	121.062	56.3622	77.5996	Uroporphyrinogen decarboxylase
maker-pcu_contig_737-snap-gene-0.11-mRNA-1	0	258.005	0	120.954	182.043	145.757	Casein kinase II subunit beta
maker-pcu_contig_783-snap-gene-0.7-mRNA-1	0	0	221.105	120.954	165.321	160.82	Protein tyrosine phosphatase type IVA protein 1
maker-pcu_contig_772-snap-gene-0.5-mRNA-1	0	0	0	120.954	92.7541	158.627	NADH ubiquinone oxidoreductase
maker-pcu_contig_141-fgenesh-gene-0.1-mRNA-1	0	0	0	120.767	0	71.7066	Tyrosine phosphatase
maker-pcu_contig_274-snap-gene-0.9-mRNA-1	0	172.691	77.5634	120.712	49.2075	38.6876	Conserved gene of unknown function
maker-pcu_contig_230-snap-gene-0.6-mRNA-1	0	133.366	290.428	120.621	178.549	297.671	Conserved gene of unknown function
maker-pcu_contig_1247-snap-gene-0.3-mRNA-1	0	89.707	0	120.57	112.68	122.235	Phenylalanine-4-hydroxylase, henna
maker-pcu_contig_746-snap-gene-0.7-mRNA-1	0	127.505	0	120.545	112.703	101.994	Transcription elongation factor
maker-pcu_contig_1838-snap-gene-0.1-mRNA-1	0	69.0739	43.1642	120.505	72.3722	89.0541	Conserved gene of unknown function
maker-pcu_contig_1825-snap-gene-0.1-mRNA-1	0	0	0	120.481	0	67.9603	CUE domain containing protein
maker-pcu_contig_889-snap-gene-0.5-mRNA-1	0	224.934	241.419	120.414	180.51	206.066	Sphingosine kinase
maker-pcu_contig_1140-snap-gene-0.4-mRNA-1	0	113.498	0	120.387	117.043	168.41	NADH-cytochrome b5 reductase
maker-pcu_contig_26839-fgenesh-gene-0.0-mRNA-1	0	0	0	120.364	0	123.048	Cell surface leucine-rich repeat-containing protein
maker-pcu_contig_118-fgenesh-gene-0.2-mRNA-1	0	182.512	0	120.31	209.772	303.845	Conserved gene of unknown function
maker-pcu_contig_846-snap-gene-0.5-mRNA-1	0	99.746	0	120.09	75.2226	130.211	Glyceraldehyde-3-phosphate dehydrogenase
maker-pcu_contig_1072-snap-gene-0.7-mRNA-1	0	0	0	120.071	188.408	97.3601	RuvB-like 2
maker-pcu_contig_10185-snap-gene-0.0-mRNA-1	0	676.004	308.312	120	107.994	46.6503	Chloroplast protease
maker-pcu_contig_56-fgenesh-gene-0.3-mRNA-1	0	120.98	0	119.959	145.771	242.034	Chorismate synthase
maker-pcu_contig_583-snap-gene-0.9-mRNA-1	0	87.2129	0	119.957	66.826	63.2514	Acetyl-coenzyme A transporter
maker-pcu_contig_252-snap-gene-0.10-mRNA-1	0	85.9886	85.7488	119.628	177.799	244.866	DNA-directed RNA polymerase
maker-pcu_contig_1059-snap-gene-0.5-mRNA-1	0	0	0	119.099	0	33.5903	Protein phosphatase
maker-pcu_contig_290-snap-gene-0.8-mRNA-1	0	176.98	101.747	118.836	258.199	160.47	WD repeat domain phosphoinositide-interacting protein 3
maker-pcu_contig_3746-snap-gene-0.2-mRNA-1	0	0	0	118.464	228.915	152.049	Conserved gene of unknown function
maker-pcu_contig_36-fgenesh-gene-0.9-mRNA-1	0	195.393	0	118.457	73.7794	163.998	CDS Pa_1_17600
maker-pcu_contig_532-snap-gene-0.4-mRNA-1	0	0	0	118.431	78.4048	89.8398	Inositol-tetrakisphosphate 1-kinase
maker-pcu_contig_759-snap-gene-0.6-mRNA-1	0	0	0	118.4	0	53.429	Transmembrane protein
maker-pcu_contig_202-snap-gene-0.12-mRNA-1	0	121.131	131.892	118.232	92.0418	95.688	50S ribosomal protein L4
maker-pcu_contig_1384-snap-gene-0.2-mRNA-1	0	40.0033	75.1362	118.078	148.184	121.751	Endo-1,3(4)-beta-glucanase
maker-pcu_contig_4003-fgenesh-gene-0.0-mRNA-1	0	119.299	0	117.98	60.433	135	Lectin
maker-pcu_contig_7-snap-gene-0.16-mRNA-1	0	87.3713	101.187	117.959	133.21	141.037	Phosphatidylinositol kinase
maker-pcu_contig_4948-snap-gene-0.2-mRNA-1	0	162.268	100.962	117.947	143.425	164.109	Conserved gene of unknown function
maker-pcu_contig_2474-snap-gene-0.2-mRNA-1	0	91.4081	87.1549	117.928	115.851	101.549	DEAD/DEAH box RNA helicase
maker-pcu_contig_539-snap-gene-0.4-mRNA-1	0	0	97.8994	117.795	75.418	59.605	Eukaryotic initiation factor 4A-III
maker-pcu_contig_702-snap-gene-0.4-mRNA-1	0	169.189	221.063	117.722	120.211	143.875	Ras family GTPase
maker-pcu_contig_15019-snap-gene-0.0-mRNA-1	0	111.112	0	117.566	0	0	Necrosis-inducing
maker-pcu_contig_4377-snap-gene-0.0-mRNA-1	0	0	0	117.278	255.33	190.015	Crinkler (CRN) family protein
maker-pcu_contig_2173-fgenesh-gene-0.2-mRNA-1	0	180.491	0	117.259	117.554	151.183	Subunit of the ARP2/3 complex
maker-pcu_contig_285-fgenesh-gene-0.0-mRNA-1	0	58.6713	0	116.974	85.2441	63.5626	Surface antigen
maker-pcu_contig_12067-snap-gene-0.1-mRNA-1	0	0	474.967	116.713	192.93	167.489	Ras family GTPase
maker-pcu_contig_99-snap-gene-0.8-mRNA-1	0	108.251	94.294	116.641	111.097	99.631	Myb-like DNA-binding protein
maker-pcu_contig_718-snap-gene-0.4-mRNA-1	0	114.305	202.214	116.632	78.8633	88.0266	Conserved gene of unknown function
maker-pcu_contig_1248-snap-gene-0.1-mRNA-1	0	82.1553	0	116.621	0	0	Zinc finger protein 2
maker-pcu_contig_1250-snap-gene-0.6-mRNA-1	0	111.306	0	116.547	140.723	140.873	Cytohesin
maker-pcu_contig_6141-snap-gene-0.1-mRNA-1	0	0	0	116.458	0	29.2493	Glycoside hydrolase
maker-pcu_contig_1588-snap-gene-0.0-mRNA-1	0	118.6	122.902	116.37	125.189	137.143	Leukotriene A-4 hydrolase
maker-pcu_contig_92-snap-gene-0.20-mRNA-1	0	58.5439	146.034	116.339	79.7261	79.3585	Pyridine nucleotide-disulphide oxidoreductase
maker-pcu_contig_1399-snap-gene-0.1-mRNA-1	0	0	0	116.335	0	0	Carbohydrate-binding protein
maker-pcu_contig_6894-fgenesh-gene-0.0-mRNA-1	0	164.111	0	116.15	60.414	160.721	Alcohol dehydrogenase class-3
maker-pcu_contig_3163-snap-gene-0.3-mRNA-1	0	84.1211	149.168	116.101	90.0096	90.479	Myosin
maker-pcu_contig_2586-snap-gene-0.2-mRNA-1	0	0	0	116.077	95.6002	60.0194	ARF GTPase activating protein
maker-pcu_contig_945-fgenesh-gene-0.0-mRNA-1	0	105.344	76.4688	116.053	64.7995	77.2118	Ethanolamine-phosphate cytidylyltransferase
maker-pcu_contig_62-snap-gene-0.13-mRNA-1	0	227.099	228.253	115.969	0	108.186	Secreted RxLR effector peptide protein
maker-pcu_contig_335-fgenesh-gene-0.3-mRNA-1	0	126.196	120.496	115.947	154.9	171.16	Microtubule binding protein D-CLIP-190
maker-pcu_contig_3917-snap-gene-0.4-mRNA-1	0	0	0	115.929	109.172	44.7422	RNA-binding protein PNO1
maker-pcu_contig_292-snap-gene-0.7-mRNA-1	0	129.659	112.943	115.787	122.833	21.3954	GAF domain-containing protein
maker-pcu_contig_1858-snap-gene-0.7-mRNA-1	0	0	0	115.765	0	71.5192	Coiled-coil domain containing 124
maker-pcu_contig_55-snap-gene-0.18-mRNA-1	0	116.041	67.3866	115.751	72.7787	86.2346	Pho88 family protein
maker-pcu_contig_69-fgenesh-gene-0.4-mRNA-1	0	203.737	84.3479	115.647	94.6009	119.396	Whole genome shotgun sequence assembly, scaffold_4
maker-pcu_contig_995-fgenesh-gene-0.0-mRNA-1	0	130.877	0	115.468	0	17.5356	NmrA-like family protein
maker-pcu_contig_28146-snap-gene-0.1-mRNA-1	0	0	0	115.4	0	91.7232	Conserved edge expressed protein
maker-pcu_contig_615-fgenesh-gene-0.2-mRNA-1	0	0	0	115.302	0	84.0082	Gene of unknown function
maker-pcu_contig_598-fgenesh-gene-0.3-mRNA-1	0	177.261	0	115.148	0	83.5096	Ycf21 protein
maker-pcu_contig_1246-snap-gene-0.2-mRNA-1	0	125.767	0	115.122	106.486	93.7985	GF12385
maker-pcu_contig_41-snap-gene-0.19-mRNA-1	0	92.8822	88.8004	115.033	165.253	128.476	DNA-directed RNA polymerase
maker-pcu_contig_451-snap-gene-0.8-mRNA-1	0	145.321	105.487	115.033	120.939	137.885	Conserved gene of unknown function
maker-pcu_contig_3909-snap-gene-0.2-mRNA-1	0	66.2138	0	115.013	115.001	87.0287	H-translocating Pyrophosphatase (H-PPase) Family
maker-pcu_contig_950-snap-gene-0.7-mRNA-1	0	76.8524	0	114.872	91.2755	115.338	Sphingosine-1-phosphate lyase
maker-pcu_contig_4137-snap-gene-0.1-mRNA-1	0	52.6994	98.3678	114.694	101.336	108.545	Ankyrin
maker-pcu_contig_244-snap-gene-0.6-mRNA-1	0	97.7619	216.616	114.628	102.397	131.796	Serine/threonine-protein phosphatase
maker-pcu_contig_22509-snap-gene-0.0-mRNA-1	0	522.947	756.495	114.499	0	0	Calmodulin
maker-pcu_contig_1930-snap-gene-0.5-mRNA-1	0	0	0	114.461	0	39.1999	RRNA-processing protein FCF1
maker-pcu_contig_920-snap-gene-0.1-mRNA-1	0	58.2244	70.6424	114.117	78.5523	70.3304	Cell division protease ftsH
maker-pcu_contig_4809-fgenesh-gene-0.0-mRNA-1	0	181.877	160.058	114.063	169.789	266.59	Conserved gene of unknown function
maker-pcu_contig_10464-snap-gene-0.0-mRNA-1	0	90.9387	213.878	114.063	106.612	131.288	Acyltransferase family
maker-pcu_contig_3028-snap-gene-0.0-mRNA-1	0	64.5506	0	113.631	0	0	Zinc finger protein 2
maker-pcu_contig_911-fgenesh-gene-0.3-mRNA-1	0	116.05	139.968	113.603	58.1416	112.781	Estradiol 17-beta-dehydrogenase
maker-pcu_contig_1690-fgenesh-gene-0.0-mRNA-1	0	127.314	0	113.484	0	128.026	Contig An12c0060, complete genome
maker-pcu_contig_21556-snap-gene-0.1-mRNA-1	0	0	0	113.308	178.814	242.498	Conserved gene of unknown function
maker-pcu_contig_3746-snap-gene-0.0-mRNA-1	0	111.271	178.939	113.266	100.345	94.6068	Thioredoxin
maker-pcu_contig_17509-snap-gene-0.0-mRNA-1	0	0	0	113.111	83.5936	83.6503	Nuclear pore complex protein
maker-pcu_contig_243-fgenesh-gene-0.10-mRNA-1	0	0	215.656	112.953	185.234	134.245	Ubiquitin carrier protein
maker-pcu_contig_1678-snap-gene-0.1-mRNA-1	0	73.9119	112.669	112.755	152.441	129.854	H-or Na-translocating F-type, V-type and A-type ATPase (F-ATPase) Superfamily
maker-pcu_contig_169-snap-gene-0.12-mRNA-1	0	232.75	0	112.674	0	113.539	Major Facilitator Superfamily (MFS)
maker-pcu_contig_1251-snap-gene-0.2-mRNA-1	0	60.1142	0	112.61	0	29.1388	Bile-salt-activated lipase precursor
maker-pcu_contig_844-snap-gene-0.2-mRNA-1	0	0	0	112.51	64.6541	86.9891	Pleckstriny domain-containing protein
maker-pcu_contig_4450-snap-gene-0.1-mRNA-1	0	110.389	0	112.33	56.0287	39.035	Major Facilitator Superfamily (MFS)
maker-pcu_contig_7113-snap-gene-0.1-mRNA-1	0	144.218	105.971	112.324	93.8463	119.006	Cc1-9
maker-pcu_contig_131-fgenesh-gene-0.5-mRNA-1	0	236.909	353.768	112.314	0	146.2	ARP2/3 complex 20 kDa subunit
maker-pcu_contig_132-fgenesh-gene-0.2-mRNA-1	0	169.221	0	112.314	0	104.777	Lactoylglutathione lyase
maker-pcu_contig_829-snap-gene-0.8-mRNA-1	0	0	0	112.277	138.26	166.403	Protein transporter Sec31A
maker-pcu_contig_16317-snap-gene-0.1-mRNA-1	0	0	0	112.25	0	70.5123	Conserved gene of unknown function
maker-pcu_contig_2319-snap-gene-0.3-mRNA-1	0	65.1349	47.2809	112.14	68.3475	79.3285	CG7015-PA
maker-pcu_contig_559-snap-gene-0.10-mRNA-1	0	0	0	112.024	78.3288	143.799	S-formylglutathione hydrolase
maker-pcu_contig_30-snap-gene-0.18-mRNA-1	0	0	0	111.972	0	37.3221	ER-derived vesicles protein ERV14
maker-pcu_contig_455-snap-gene-0.5-mRNA-1	0	108.127	90.8227	111.836	88.0295	31.5419	ATP-binding Cassette (ABC) Superfamily
maker-pcu_contig_489-snap-gene-0.0-mRNA-1	0	0	0	111.818	0	122.643	Protein kinase
maker-pcu_contig_731-snap-gene-0.3-mRNA-1	0	0	0	111.751	298.826	283.66	Conserved gene of unknown function
maker-pcu_contig_5815-snap-gene-0.4-mRNA-1	0	0	206.54	111.751	131.552	81.9463	Dicarboxylate/amino acid:cation
maker-pcu_contig_8732-snap-gene-0.1-mRNA-1	0	205.723	241.938	111.647	98.2692	206.609	Phosphatidylinositol kinase
maker-pcu_contig_1099-snap-gene-0.1-mRNA-1	0	86.4759	203.382	111.384	127.663	130.618	Nuclear protein UKp68 isoform 2 isoform 7
maker-pcu_contig_2680-snap-gene-0.4-mRNA-1	0	121.305	73.153	111.38	162.065	131.224	Villin
maker-pcu_contig_11547-snap-gene-0.0-mRNA-1	0	0	201.027	111.258	94.9317	160.381	Zgc:112095
maker-pcu_contig_94-fgenesh-gene-0.2-mRNA-1	0	0	0	111.224	43.8416	24.9345	Guanine nucleotide-binding protein
maker-pcu_contig_60-snap-gene-0.10-mRNA-1	0	0	0	111.147	0	47.0211	Myb-like DNA-binding protein
maker-pcu_contig_250-snap-gene-0.6-mRNA-1	0	81.6644	91.8146	110.886	141.011	134.886	GI15442
maker-pcu_contig_1949-snap-gene-0.1-mRNA-1	0	71.9826	111.153	110.758	51.1446	104.334	Phosphatidylinositol kinase (PIK-K)
maker-pcu_contig_2-fgenesh-gene-0.11-mRNA-1	0	0	0	110.66	42.8672	38.4683	Periodic tryptophan protein
maker-pcu_contig_975-snap-gene-0.4-mRNA-1	0	244.256	0	110.524	141.409	288.34	Glutathione peroxidase
maker-pcu_contig_63-fgenesh-gene-0.8-mRNA-1	0	148.852	0	110.401	0	122.602	Dihydrolipoyllysine-residue succinyltransferase component of 2-oxoglutarate dehydrogenase complex
maker-pcu_contig_952-snap-gene-0.7-mRNA-1	0	0	0	110.319	187.985	74.3275	Presenilin
maker-pcu_contig_3488-fgenesh-gene-0.0-mRNA-1	0	72.3106	98.9807	110.201	96.435	71.5351	ATP-binding cassette sub-family E member 1
maker-pcu_contig_61-fgenesh-gene-0.2-mRNA-1	0	83.8318	79.3187	110.115	67.7793	59.2143	DnaJ subfamily C member 2 protein
maker-pcu_contig_243-snap-gene-0.27-mRNA-1	0	0	0	109.909	0	126.577	Mitochondrial import inner membrane translocase subunit Tim17
maker-pcu_contig_336-snap-gene-0.8-mRNA-1	0	0	0	109.848	0	89.0707	Conserved gene of unknown function
maker-pcu_contig_1735-snap-gene-0.3-mRNA-1	0	0	0	109.601	146.307	107.518	Peroxisomal hydratase-dehydrogenase-epimerase
maker-pcu_contig_838-fgenesh-gene-0.1-mRNA-1	0	0	0	109.552	0	87.9398	DUF1077 family protein
maker-pcu_contig_56-snap-gene-0.27-mRNA-1	0	0	0	109.515	0	62.6813	Conserved gene of unknown function
maker-pcu_contig_30422-snap-gene-0.0-mRNA-1	0	0	0	109.474	0	0	Necrosis and ethylene-inducing protein 1
maker-pcu_contig_118-snap-gene-0.14-mRNA-1	0	103.276	100.242	109.405	128.762	89.1871	TBC1 domain family, member 23
maker-pcu_contig_1227-fgenesh-gene-0.0-mRNA-1	0	0	0	109.4	184.456	169.701	HSF-type DNA-binding
maker-pcu_contig_403-fgenesh-gene-0.1-mRNA-1	0	64.1911	38.1584	109.369	79.2007	114.34	Valyl-tRNA synthetase
maker-pcu_contig_2137-snap-gene-0.5-mRNA-1	0	76.8067	0	109.318	143.404	118.188	Conserved gene of unknown function
maker-pcu_contig_4323-snap-gene-0.3-mRNA-1	0	0	0	109.249	0	81.4319	YALI0C11055p
maker-pcu_contig_526-snap-gene-0.9-mRNA-1	0	82.1307	181.606	109.236	90.5251	84.2707	M96 mating-specific protein family
maker-pcu_contig_1486-fgenesh-gene-0.0-mRNA-1	0	149.241	158.437	109.222	72.9011	115.182	Cytochrome b-c1 complex subunit 7
maker-pcu_contig_1428-fgenesh-gene-0.1-mRNA-1	0	176.21	0	109.145	149.695	177.002	26S proteasome non-ATPase regulatory subunit
maker-pcu_contig_162-snap-gene-0.24-mRNA-1	0	0	0	109.105	150.376	72.1951	Secreted RxLR effector peptide protein
maker-pcu_contig_7382-snap-gene-0.0-mRNA-1	0	0	140.063	109.105	0	139.656	LAG1 longevity assurance
maker-pcu_contig_414-fgenesh-gene-0.1-mRNA-1	0	125.864	0	109.066	81.976	43.4267	GrpE protein homolog
maker-pcu_contig_239-snap-gene-0.7-mRNA-1	0	0	254.708	108.727	102.391	243.515	Annexin (Annexin) Family
maker-pcu_contig_21544-snap-gene-0.0-mRNA-1	0	0	0	108.719	0	142.181	Glutamyl-tRNA synthetase
maker-pcu_contig_3618-fgenesh-gene-0.0-mRNA-1	0	91.647	99.7889	108.699	0	55.4745	Glucosylceramidase
maker-pcu_contig_814-snap-gene-0.4-mRNA-1	0	0	0	108.63	0	41.5797	Conserved gene of unknown function
maker-pcu_contig_7383-snap-gene-0.0-mRNA-1	0	70.8284	0	108.272	52.7612	18.1754	SCP-like extracellular protein
maker-pcu_contig_788-snap-gene-0.6-mRNA-1	0	0	0	108.222	0	97.9933	Repressor of RNA polymerase III transcription
maker-pcu_contig_224-snap-gene-0.6-mRNA-1	0	170.148	61.7547	108.095	80.0354	61.6512	Major Facilitator Superfamily (MFS)
maker-pcu_contig_868-snap-gene-0.6-mRNA-1	0	124.703	162.937	108.055	0	55.5726	Peptidyl-prolyl cis-trans isomerase
maker-pcu_contig_15415-snap-gene-0.1-mRNA-1	0	0	0	107.951	0	82.6397	GH15718
maker-pcu_contig_3895-snap-gene-0.3-mRNA-1	0	0	0	107.835	125.398	102.296	Callose synthase
maker-pcu_contig_130-fgenesh-gene-0.2-mRNA-1	0	89.6104	0	107.785	0	93.5367	(Fragment)
maker-pcu_contig_517-fgenesh-gene-0.1-mRNA-1	0	94.0697	0	107.697	76.585	88.8735	EF hand family protein
maker-pcu_contig_735-fgenesh-gene-0.0-mRNA-1	0	0	0	107.569	0	119.019	Conserved gene of unknown function
maker-pcu_contig_114-snap-gene-0.9-mRNA-1	0	58.0846	118.651	107.534	116.689	126.232	BEACH domain-containing protein
maker-pcu_contig_1486-snap-gene-0.6-mRNA-1	0	0	110.418	107.468	0	76.7848	Conserved gene of unknown function
maker-pcu_contig_212-snap-gene-0.13-mRNA-1	0	54.645	85.6795	107.345	87.7899	80.908	Serine/threonine-protein phosphatase
maker-pcu_contig_427-snap-gene-0.5-mRNA-1	0	0	0	107.33	0	87.6264	Conserved gene of unknown function
maker-pcu_contig_1445-snap-gene-0.2-mRNA-1	0	66.135	91.8133	107.116	69.9952	112.55	Conserved hypothetical protein
maker-pcu_contig_798-fgenesh-gene-0.3-mRNA-1	0	105.268	152.023	107.036	101.038	119.958	Conserved gene of unknown function
maker-pcu_contig_15001-snap-gene-0.1-mRNA-1	0	0	0	106.889	0	20.6267	U3 small nucleolar RNA-associated protein
maker-pcu_contig_2439-fgenesh-gene-0.2-mRNA-1	0	0	0	106.816	150.251	182.263	Heme/steroid binding domain-containing protein
maker-pcu_contig_185-snap-gene-0.14-mRNA-1	0	71.8784	86.6925	106.816	122.438	104.649	Gpr7 transmembrane protein
maker-pcu_contig_643-snap-gene-0.8-mRNA-1	0	86.4671	77.471	106.637	101.369	89.1652	Transcription elongation factor SPT5
maker-pcu_contig_1672-fgenesh-gene-0.0-mRNA-1	0	63.4743	0	106.523	45.4752	31.8641	Asparaginase
maker-pcu_contig_1342-snap-gene-0.1-mRNA-1	0	119.535	164.093	106.38	83.7664	189.984	ATP-binding Cassette (ABC) Superfamily
maker-pcu_contig_208-snap-gene-0.7-mRNA-1	0	159.13	0	106.356	84.209	124.27	Conserved hypothetical protein
maker-pcu_contig_82-snap-gene-0.23-mRNA-1	0	0	0	106.356	0	84.9894	CCAAT-binding transcription factor
maker-pcu_contig_275-snap-gene-0.13-mRNA-1	0	93.954	139.501	106.337	97.3519	143.222	ENSANGP00000006257
maker-pcu_contig_2836-snap-gene-0.3-mRNA-1	0	0	322.441	106.314	111.272	144.471	Cell division protein ftsZ
maker-pcu_contig_1720-fgenesh-gene-0.1-mRNA-1	0	0	0	106.314	61.818	74.9612	Septum site-determining protein minD
maker-pcu_contig_4692-snap-gene-0.1-mRNA-1	0	119.201	97.3431	106.127	106.75	78.0363	Carbohydrate-binding protein
maker-pcu_contig_307-snap-gene-0.7-mRNA-1	0	0	186.999	106.127	0	44.8976	Eukaryotic initiation factor 4E
maker-pcu_contig_805-fgenesh-gene-0.0-mRNA-1	0	0	0	106.116	0	27.7506	Conserved gene of unknown function
maker-pcu_contig_261-snap-gene-0.5-mRNA-1	0	106.465	82.9298	106.033	128.014	107.893	P-type ATPase (P-ATPase) Superfamily
maker-pcu_contig_228-fgenesh-gene-0.0-mRNA-1	0	114.457	271.911	105.99	149.093	155.444	Acyl-CoA desaturase 1
maker-pcu_contig_58-fgenesh-gene-0.4-mRNA-1	0	133.153	152.231	105.881	70.4624	240.094	Cysteine protease family C01A
maker-pcu_contig_7619-fgenesh-gene-0.0-mRNA-1	0	119.67	0	105.551	129.903	163.731	Dimeric dihydrodiol dehydrogenase
maker-pcu_contig_3-fgenesh-gene-0.7-mRNA-1	0	84.9255	0	105.508	98.3331	85.8901	Protein kinase
maker-pcu_contig_698-snap-gene-0.7-mRNA-1	0	111.981	112.55	105.222	84.1539	84.0833	30S ribosomal protein S5
maker-pcu_contig_480-snap-gene-0.11-mRNA-1	0	0	0	105.147	74.6712	84.0236	Conserved gene of unknown function
maker-pcu_contig_1483-snap-gene-0.5-mRNA-1	0	0	0	105.088	170.01	179.802	Exoglucanase 1
maker-pcu_contig_1043-fgenesh-gene-0.0-mRNA-1	0	0	179.507	105.088	107.375	480.144	Myb-like DNA-binding protein
maker-pcu_contig_319-snap-gene-0.7-mRNA-1	0	59.7203	92.2184	104.881	148.512	205.505	GTP-binding protein
maker-pcu_contig_719-snap-gene-0.4-mRNA-1	0	84.4667	49.051	104.877	95.7642	91.8741	KIAA0090 homolog
maker-pcu_contig_25-snap-gene-0.29-mRNA-1	0	72.4716	0	104.866	112.556	86.3297	Serine/threonine-protein phosphatase
maker-pcu_contig_1823-snap-gene-0.3-mRNA-1	0	122.923	113.373	104.83	89.4789	100.629	UBX domain-containing protein
maker-pcu_contig_162-snap-gene-0.15-mRNA-1	0	137.218	140.871	104.807	140.44	105.569	Mannose-P-dolichol utilization defect 1 protein
maker-pcu_contig_290-snap-gene-0.13-mRNA-1	0	89.2242	116.581	104.731	102.814	98.4597	CDP-alcohol phosphatidyltransferase
maker-pcu_contig_199-snap-gene-0.6-mRNA-1	0	85.3667	62.5717	104.661	135.609	129.105	5-oxoprolinase
maker-pcu_contig_120-snap-gene-0.10-mRNA-1	0	0	0	104.622	66.9564	52.2048	Protein phosphatase methylesterase
maker-pcu_contig_14052-fgenesh-gene-0.0-mRNA-1	0	0	0	104.394	0	102.143	Aldose 1-epimerase
maker-pcu_contig_199-fgenesh-gene-0.1-mRNA-1	0	0	0	104.376	113.461	141.302	CCR4-NOT transcription complex subunit 7
maker-pcu_contig_10181-snap-gene-0.1-mRNA-1	0	58.6517	0	104.376	103.14	103.03	Long-chain-fatty-acid-CoA ligase
maker-pcu_contig_6489-snap-gene-0.2-mRNA-1	0	0	0	104.232	0	0	Lysosomal acid lipase/cholesteryl ester hydrolase
maker-pcu_contig_3476-snap-gene-0.4-mRNA-1	0	0	0	104.219	86.6043	64.3481	Major Facilitator Superfamily (MFS)
maker-pcu_contig_586-snap-gene-0.4-mRNA-1	0	0	0	104.158	0	12.1557	Conserved gene of unknown function
maker-pcu_contig_243-fgenesh-gene-0.2-mRNA-1	0	0	0	104.112	0	58.7268	DNA-directed RNA polymerase I, II, and III subunit rpabc3
maker-pcu_contig_57-snap-gene-0.9-mRNA-1	0	56.6673	137.821	103.636	149.458	140.686	HECT E3 ubiquitin ligase
maker-pcu_contig_2540-snap-gene-0.3-mRNA-1	0	0	0	103.62	0	85.8475	SCO1 family protein
maker-pcu_contig_518-fgenesh-gene-0.0-mRNA-1	0	0	0	103.588	0	51.1271	Riboflavin biosynthesis protein ribBA
maker-pcu_contig_498-snap-gene-0.6-mRNA-1	0	35.7551	65.405	103.537	114.108	113.731	Vesicle-fusing ATPase
maker-pcu_contig_44-snap-gene-0.22-mRNA-1	0	0	0	103.385	0	53.457	Conserved gene of unknown function
maker-pcu_contig_718-snap-gene-0.3-mRNA-1	0	0	0	103.241	88.0794	63.0883	Conserved gene of unknown function
maker-pcu_contig_264-snap-gene-0.5-mRNA-1	0	0	203.281	103.208	0	114.194	Conserved gene of unknown function
maker-pcu_contig_6-snap-gene-0.29-mRNA-1	0	214.878	140.381	103.19	155.501	165.204	Conserved gene of unknown function
maker-pcu_contig_57-snap-gene-0.11-mRNA-1	0	45.2676	111.051	103.151	122.144	103.674	Ubiquitin-specific protease
maker-pcu_contig_2315-snap-gene-0.2-mRNA-1	0	83.6123	173.893	103.147	104.463	110.751	Novel protein
maker-pcu_contig_2615-snap-gene-0.2-mRNA-1	0	93.527	0	103.108	60.9145	44.7389	Serine protease family S01A
maker-pcu_contig_666-fgenesh-gene-0.2-mRNA-1	0	213.619	0	102.811	301.451	552.637	Nuclear LIM interactor-interacting protein
maker-pcu_contig_9838-snap-gene-0.2-mRNA-1	0	0	0	102.811	178.756	173.978	Low molecular weight protein-tyrosine-phosphatase ywlE
maker-pcu_contig_126-fgenesh-gene-0.1-mRNA-1	0	122.946	0	102.811	74.3557	114.725	Microtubule-associated protein EB1
maker-pcu_contig_2-snap-gene-0.33-mRNA-1	0	66.6079	60.2518	102.778	86.764	92.4655	Vacuolar protein sorting-associated protein 18
maker-pcu_contig_235-snap-gene-0.16-mRNA-1	0	94.9239	237.271	102.758	158.593	130.713	Uncharacterized calcium-binding protein C800.10c
maker-pcu_contig_2727-snap-gene-0.1-mRNA-1	0	69.3451	113.259	102.689	77.7837	95.1605	Global transcription factor group
maker-pcu_contig_448-snap-gene-0.8-mRNA-1	0	98.4075	108.278	102.679	101.2	97.4872	Dolichyl pyrophosphate Man9GlcNAc2 alpha-1,3-glucosyltransferase
maker-pcu_contig_209-snap-gene-0.6-mRNA-1	0	50.4883	77.9627	102.636	98.6498	80.9201	Striatin-3 family protein
maker-pcu_contig_27195-snap-gene-0.0-mRNA-1	0	0	0	102.528	0	54.7818	Conserved gene of unknown function
maker-pcu_contig_717-snap-gene-0.5-mRNA-1	0	0	0	102.526	138.353	96.3868	Conserved gene of unknown function
maker-pcu_contig_2531-fgenesh-gene-0.0-mRNA-1	0	234.785	204.515	102.526	80.0991	160.645	Conserved gene of unknown function
maker-pcu_contig_741-snap-gene-0.3-mRNA-1	0	94.8725	85.2233	102.509	42.4812	89.285	Arginine biosynthesis bifunctional protein argJ
maker-pcu_contig_1699-snap-gene-0.1-mRNA-1	0	42.7334	67.0029	102.399	96.8569	81.2559	5'-3' exoribonuclease 1
maker-pcu_contig_1095-fgenesh-gene-0.0-mRNA-1	0	0	0	102.232	93.9634	60.3864	Cysteine protease family C15
maker-pcu_contig_511-snap-gene-0.7-mRNA-1	0	106.304	0	102.232	74.1816	52.7701	Conserved gene of unknown function
maker-pcu_contig_116-snap-gene-0.18-mRNA-1	0	46.1026	0	102.225	62.7833	21.0227	Ankyrin repeat-containing protein
maker-pcu_contig_450-snap-gene-0.8-mRNA-1	0	0	0	102.026	100.176	181.504	Conserved gene of unknown function
maker-pcu_contig_3295-snap-gene-0.1-mRNA-1	0	64.6901	0	101.988	75.8393	126.192	Histone tail methylase containing SET domain (ISS)
maker-pcu_contig_2113-snap-gene-0.0-mRNA-1	0	0	177.606	101.901	93.1908	68.7702	ENSANGP00000010228
maker-pcu_contig_82-fgenesh-gene-0.9-mRNA-1	0	0	0	101.476	81.9548	90.3783	Histone chaperone ASF1
maker-pcu_contig_2591-snap-gene-0.0-mRNA-1	0	0	0	101.363	0	38.798	Conserved gene of unknown function
maker-pcu_contig_583-snap-gene-0.6-mRNA-1	0	96.5679	134.062	101.276	66.826	176.575	Protein phosphatase
maker-pcu_contig_1437-snap-gene-0.2-mRNA-1	0	83.6047	98.8348	101.142	93.3464	77.0194	HECT ubiquitin ligase
maker-pcu_contig_334-snap-gene-0.13-mRNA-1	0	86.9609	86.7129	101.097	71.5427	106.186	Kinesin
maker-pcu_contig_99-snap-gene-0.17-mRNA-1	0	73.3308	78.7048	101.082	80.1697	118.911	Protein transporter Sec24
maker-pcu_contig_10746-fgenesh-gene-0.0-mRNA-1	0	0	0	100.749	167.153	32.2572	Pectage lyase
maker-pcu_contig_25-fgenesh-gene-0.9-mRNA-1	0	0	0	100.727	80.0561	96.9811	Conserved gene of unknown function
maker-pcu_contig_2234-snap-gene-0.2-mRNA-1	0	55.2659	0	100.646	56.992	95.0593	Transmembrane protein
maker-pcu_contig_808-snap-gene-0.9-mRNA-1	0	0	0	100.638	93.6454	83.8605	Nuclear migration protein nudC
maker-pcu_contig_671-snap-gene-0.8-mRNA-1	0	0	0	100.592	83.1975	108.476	Conserved gene of unknown function
maker-pcu_contig_824-snap-gene-0.2-mRNA-1	0	101.068	95.0807	100.579	104.005	131.414	Vacuolar-sorting receptor
maker-pcu_contig_162-snap-gene-0.18-mRNA-1	0	112.709	0	100.42	85.6426	89.0121	ATP phosphoribosyltransferase
maker-pcu_contig_97-snap-gene-0.6-mRNA-1	0	118.427	0	100.385	77.132	104.755	Protein phosphatase 2C
maker-pcu_contig_3450-snap-gene-0.2-mRNA-1	0	45.2601	0	100.354	93.7939	100.242	Long-chain-fatty-acid-CoA ligase
maker-pcu_contig_2418-snap-gene-0.2-mRNA-1	0	145.055	83.3932	100.303	98.2539	107.332	Transmembrane protein
maker-pcu_contig_1157-snap-gene-0.5-mRNA-1	0	46.2208	69.9281	100.062	83.9738	76.9985	Enhancer of mRNA-decapping protein
maker-pcu_contig_1140-snap-gene-0.6-mRNA-1	0	73.0747	0	100.024	51.2549	43.923	Phosphoglycerate mutase family protein
maker-pcu_contig_1637-snap-gene-0.4-mRNA-1	0	71.4681	101.162	99.9339	58.1843	72.5977	Nuclear pore glycoprotein
maker-pcu_contig_141-snap-gene-0.18-mRNA-1	0	71.4943	93.4151	99.9155	61.116	48.0338	Glycolipid transfer protein
maker-pcu_contig_3417-snap-gene-0.2-mRNA-1	0	0	191.981	99.8466	143.545	88.0011	Rho GDP-dissociation inhibitor
maker-pcu_contig_29422-snap-gene-0.0-mRNA-1	0	199.82	0	99.8315	0	170.605	Callose synthase
maker-pcu_contig_7285-snap-gene-0.1-mRNA-1	0	84.4969	0	99.7382	102.205	144.115	7-dehydrocholesterol reductase
maker-pcu_contig_192-snap-gene-0.18-mRNA-1	0	0	0	99.7241	97.2015	128.575	Conserved gene of unknown function
maker-pcu_contig_71-snap-gene-0.8-mRNA-1	0	32.177	61.153	99.5422	64.7762	50.7018	Lon protease homolog
maker-pcu_contig_302-snap-gene-0.11-mRNA-1	0	0	147.843	99.5365	0	82.7412	Protein kinase
maker-pcu_contig_3515-snap-gene-0.2-mRNA-1	0	0	0	99.4027	72.7672	62.0769	Heat shock protein 75 kDa, mitochondrial
maker-pcu_contig_2452-snap-gene-0.4-mRNA-1	0	91.555	0	99.3191	135.162	103.293	Conserved gene of unknown function
maker-pcu_contig_747-snap-gene-0.4-mRNA-1	0	34.1357	77.0397	99.3036	82.8674	93.3574	Myosin heavy chain
maker-pcu_contig_1352-snap-gene-0.5-mRNA-1	0	38.5373	46.9962	99.1576	56.8921	44.1569	Importin
maker-pcu_contig_1341-snap-gene-0.1-mRNA-1	0	0	0	99.0947	47.5966	35.6917	NBP2b protein
maker-pcu_contig_224-snap-gene-0.13-mRNA-1	0	114.568	134.726	99.0245	100.735	144.571	Serine palmitoyltransferase
maker-pcu_contig_332-snap-gene-0.7-mRNA-1	0	0	150.144	98.9863	69.0851	98.9811	NADH-cytochrome b5 reductase
maker-pcu_contig_52-snap-gene-0.21-mRNA-1	0	64.9065	99.7733	98.9311	87.0344	74.4058	CCR4-NOT transcription complex subunit
maker-pcu_contig_330-snap-gene-0.13-mRNA-1	0	0	0	98.8961	0	81.3526	Conserved gene of unknown function
maker-pcu_contig_2250-snap-gene-0.3-mRNA-1	0	0	0	98.8565	0	66.9147	Nuclear transcription factor Y subunit
maker-pcu_contig_453-fgenesh-gene-0.0-mRNA-1	0	108.609	74.6892	98.8146	70.7376	84.4276	Ubiquinone biosynthesis monooxygenase
maker-pcu_contig_58-snap-gene-0.18-mRNA-1	0	0	0	98.7702	0	58.246	Mitochondrial Carrier (MC) Family
maker-pcu_contig_19-snap-gene-0.30-mRNA-1	0	59.747	0	98.6983	77.8269	84.9371	TBC1 domain family member 2B
maker-pcu_contig_1747-snap-gene-0.4-mRNA-1	0	0	0	98.6983	0	136.863	Small nuclear ribonucleoprotein-associated protein
maker-pcu_contig_1466-snap-gene-0.2-mRNA-1	0	82.5128	95.1281	98.6786	101.159	150.983	Protein phosphatase 2
maker-pcu_contig_62-snap-gene-0.11-mRNA-1	0	61.7631	42.2715	98.5908	93.862	104.484	Nuclease
maker-pcu_contig_2359-fgenesh-gene-0.1-mRNA-1	0	71.4156	0	98.5324	63.1252	38.028	Zinc finger protein 259 (Predicted)
maker-pcu_contig_1396-snap-gene-0.3-mRNA-1	0	111.066	68.2919	98.4153	87.9403	117.264	Tripeptidyl-peptidase
maker-pcu_contig_828-snap-gene-0.9-mRNA-1	0	100.796	0	98.3222	93.0025	132.624	Conserved gene of unknown function
maker-pcu_contig_423-fgenesh-gene-0.3-mRNA-1	0	77.4119	109.576	98.3051	81.9304	73.935	Twinfilin
maker-pcu_contig_550-fgenesh-gene-0.3-mRNA-1	0	56.3173	110.377	98.1097	81.2193	54.1881	Pescadillo
maker-pcu_contig_1-snap-gene-0.54-mRNA-1	0	53.3268	104.516	97.5923	69.4639	101.688	ATP-dependent hsl protease ATP-binding subunit hslU
maker-pcu_contig_7877-fgenesh-gene-0.0-mRNA-1	0	99.5971	0	97.451	144.706	190.194	GMP reductase
maker-pcu_contig_910-snap-gene-0.2-mRNA-1	0	108.729	54.1068	97.3823	23.5893	6.45994	Transglutaminase elicitor M81D
maker-pcu_contig_3005-snap-gene-0.1-mRNA-1	0	27.3504	81.2188	97.2236	493.918	668.421	Conserved gene of unknown function
maker-pcu_contig_62-snap-gene-0.6-mRNA-1	0	74.748	85.9463	97.1919	151.893	134.488	Cyclin-dependent kinase with F-box domain
maker-pcu_contig_400-snap-gene-0.8-mRNA-1	0	95.3608	0	97.0746	79.0477	56.0016	CDP-alcohol phosphatidyltransferase
maker-pcu_contig_364-snap-gene-0.10-mRNA-1	0	95.3608	113.272	97.0746	0	58.4905	Dcp1-like decapping family protein
maker-pcu_contig_66-snap-gene-0.21-mRNA-1	0	219.468	0	97.0265	0	176.82	AMME syndrome candidateprotein 1 protein
maker-pcu_contig_184-snap-gene-0.10-mRNA-1	0	83.2774	63.4731	96.9497	122.038	93.4645	Conserved gene of unknown function
maker-pcu_contig_964-snap-gene-0.2-mRNA-1	0	0	0	96.9341	46.5817	45.7927	Transmembrane protein 161B
maker-pcu_contig_41-snap-gene-0.15-mRNA-1	0	126.454	0	96.6873	82.3597	56.3566	Protein kinase
maker-pcu_contig_1128-snap-gene-0.2-mRNA-1	0	132.802	105.352	96.4228	132.831	135.294	Sestrin
maker-pcu_contig_868-fgenesh-gene-0.0-mRNA-1	0	0	0	96.3038	150.074	157.094	Isocitrate lyase
maker-pcu_contig_396-snap-gene-0.8-mRNA-1	0	109.402	0	96.2268	90.6866	47.137	Conserved gene of unknown function
maker-pcu_contig_29-snap-gene-0.11-mRNA-1	0	0	0	96.2217	133.855	56.6358	SET and MYND domain containing 3
maker-pcu_contig_49-snap-gene-0.15-mRNA-1	0	125.832	0	96.1348	0	125.023	Der1-like family
maker-pcu_contig_667-snap-gene-0.4-mRNA-1	0	263.293	245.729	96.0848	159.235	173.436	2Fe-2S ferredoxin
maker-pcu_contig_887-snap-gene-0.6-mRNA-1	0	118.79	0	95.9686	72.8173	101.249	UDP-glucuronic acid decarboxylase 1
maker-pcu_contig_425-snap-gene-0.5-mRNA-1	0	113.19	115.03	95.9354	118.773	116.346	Chromodomain protein
maker-pcu_contig_4-fgenesh-gene-0.4-mRNA-1	0	125.281	0	95.7864	0	198.112	Vesicle transport through interaction with t-SNAREs homolog 1B (Yeast)
maker-pcu_contig_185-snap-gene-0.16-mRNA-1	0	67.0946	83.4918	95.7512	62.4272	54.4683	ATP-binding cassette sub-family F member 1
maker-pcu_contig_42-snap-gene-0.18-mRNA-1	0	115.885	56.1013	95.7425	112.194	114.117	Endoplasmic reticulum metallopeptidase
maker-pcu_contig_928-snap-gene-0.2-mRNA-1	0	0	0	95.6379	103.607	146.279	Conserved gene of unknown function
maker-pcu_contig_110-snap-gene-0.11-mRNA-1	0	0	0	95.5586	0	36.5763	Diaminopimelate decarboxylase
maker-pcu_contig_872-fgenesh-gene-0.1-mRNA-1	0	0	0	95.4529	66.1816	88.6156	Blr6907 protein
maker-pcu_contig_13262-snap-gene-0.1-mRNA-1	0	0	0	95.3292	0	32.1559	Glycoside hydrolase
maker-pcu_contig_639-snap-gene-0.3-mRNA-1	0	127.174	0	95.3212	82.829	88.3333	RNA-binding post-transcriptional regulator csx1
maker-pcu_contig_347-snap-gene-0.7-mRNA-1	0	97.0739	0	95.2278	0	61.6732	Allantoicase
maker-pcu_contig_3429-snap-gene-0.1-mRNA-1	0	73.4451	122.136	95.0851	143.505	113.016	DNA damage-inducible protein 1
maker-pcu_contig_496-snap-gene-0.1-mRNA-1	0	102.434	0	95.0589	118.928	126.39	Glycerol-3-phosphate dehydrogenase, mitochondrial
maker-pcu_contig_1207-snap-gene-0.8-mRNA-1	0	134.732	73.8242	94.9702	124.551	94.682	Conserved gene of unknown function
maker-pcu_contig_468-fgenesh-gene-0.3-mRNA-1	0	82.5779	68.1454	94.9702	82.0903	93.4362	Guanylate-binding protein
maker-pcu_contig_2701-snap-gene-0.0-mRNA-1	0	83.5636	0	94.9407	60.8283	64.1232	OTU domain-containing protein
maker-pcu_contig_78-snap-gene-0.9-mRNA-1	0	90.9331	56.1065	94.922	65.8056	107.448	Myosin
maker-pcu_contig_560-snap-gene-0.3-mRNA-1	0	86.1287	150.049	94.8461	93.4933	84.3656	Serine/threonine protein kinase
maker-pcu_contig_23106-snap-gene-0.1-mRNA-1	0	300.826	66.9797	94.8229	200.579	163.654	Cleavage induced tubulin alpha chain
maker-pcu_contig_337-fgenesh-gene-0.2-mRNA-1	0	159.195	0	94.6941	95.0439	64.8603	Conserved gene of unknown function
maker-pcu_contig_114-snap-gene-0.13-mRNA-1	0	87.4715	0	94.6763	49.6265	18.1988	TrkA3
maker-pcu_contig_51-snap-gene-0.28-mRNA-1	0	127.219	166.225	94.6713	121.328	138.714	Whole genome shotgun sequence assembly, scaffold_7
maker-pcu_contig_206-fgenesh-gene-0.2-mRNA-1	0	118.132	100.923	94.6713	76.9398	116.567	Carbohydrate-binding protein
maker-pcu_contig_806-snap-gene-0.4-mRNA-1	0	0	0	94.6474	60.5419	37.3716	Mitotic spindle assembly checkpoint protein MAD1
maker-pcu_contig_2531-snap-gene-0.2-mRNA-1	0	101.018	0	94.4442	55.2664	63.6965	Isoform 5 of Mucin-1
maker-pcu_contig_468-fgenesh-gene-0.2-mRNA-1	0	48.6694	63.5918	94.4353	54.7521	75.4635	Signal recognition particle
maker-pcu_contig_431-fgenesh-gene-0.5-mRNA-1	0	0	0	94.3218	102.568	113.059	Nicotinate-nucleotide pyrophosphorylase
maker-pcu_contig_11-snap-gene-0.15-mRNA-1	0	0	0	94.2978	80.3948	72.3986	SNARE associated Golgi protein
maker-pcu_contig_173-fgenesh-gene-0.3-mRNA-1	0	102.864	0	94.2978	0	93.0839	Conserved gene of unknown function
maker-pcu_contig_20324-snap-gene-0.1-mRNA-1	0	0	0	94.2292	0	91.1179	Conserved gene of unknown function
maker-pcu_contig_13011-snap-gene-0.0-mRNA-1	0	150.869	0	94.1871	72.9623	62.2095	Alpha-tubulin
maker-pcu_contig_56-fgenesh-gene-0.5-mRNA-1	0	0	0	94.106	0	148.631	Activator of heat shock 90kDa protein ATPase homolog 1
maker-pcu_contig_1236-snap-gene-0.4-mRNA-1	0	65.2806	99.5121	94.03	85.035	79.5597	Conserved gene of unknown function
maker-pcu_contig_846-fgenesh-gene-0.0-mRNA-1	0	0	0	93.7688	0	96.3397	6,7-dimethyl-8-ribityllumazine synthase
maker-pcu_contig_88-snap-gene-0.21-mRNA-1	0	87.3665	69.7606	93.7447	44.2572	94.6252	Transmembrane protein
maker-pcu_contig_36-snap-gene-0.12-mRNA-1	0	101.321	0	93.6239	65.9907	88.4579	Dihydroxy-acid dehydratase
maker-pcu_contig_1829-snap-gene-0.0-mRNA-1	0	0	120.169	93.5352	51.914	59.7954	Conserved gene of unknown function
maker-pcu_contig_2392-snap-gene-0.2-mRNA-1	0	0	0	93.4643	0	148.277	Conserved gene of unknown function
maker-pcu_contig_6760-snap-gene-0.1-mRNA-1	0	0	0	93.4643	0	36.4941	Conserved gene of unknown function
maker-pcu_contig_154-snap-gene-0.17-mRNA-1	0	49.6716	100.958	93.4007	75.4864	79.2906	P-type ATPase (P-ATPase) Superfamily
maker-pcu_contig_443-snap-gene-0.3-mRNA-1	0	100.225	67.3732	93.3256	126.464	145.031	AP-1 complex subunit beta
maker-pcu_contig_228-snap-gene-0.11-mRNA-1	0	0	0	93.3129	85.1493	122.189	Rab2 family GTPase
maker-pcu_contig_1917-fgenesh-gene-0.0-mRNA-1	0	0	0	93.2101	0	55.7319	Ribose-phosphate pyrophosphokinase
maker-pcu_contig_570-snap-gene-0.4-mRNA-1	0	46.6609	74.032	93.118	41.2442	32.9477	Vertebrate block of proliferation 1 (BOP1)
maker-pcu_contig_4378-fgenesh-gene-0.1-mRNA-1	0	0	0	93.0726	110.352	86.5273	Cystathionine gamma-lyase
maker-pcu_contig_450-snap-gene-0.6-mRNA-1	0	47.4809	230.43	93.0336	119.28	160.835	ATP-binding Cassette (ABC) Superfamily
maker-pcu_contig_978-snap-gene-0.4-mRNA-1	0	191.573	55.6246	93.0218	36.0453	29.8963	Formate-tetrahydrofolate ligase
maker-pcu_contig_813-snap-gene-0.7-mRNA-1	0	0	134.441	93.002	74.4606	50.0008	Lysophospholipid acyltransferase
maker-pcu_contig_431-snap-gene-0.12-mRNA-1	0	56.0042	102.446	92.947	128.881	81.3182	Calcium ion binding protein
maker-pcu_contig_13669-snap-gene-0.0-mRNA-1	0	0	0	92.878	98.9861	148.438	Conserved gene of unknown function
maker-pcu_contig_966-snap-gene-0.4-mRNA-1	0	0	0	92.7616	150.159	33.1387	Carbohydrate-binding protein
maker-pcu_contig_497-snap-gene-0.8-mRNA-1	0	132.494	96.1763	92.7166	53.6939	63.2648	2-oxoglutarate dehydrogenase E1 component
maker-pcu_contig_1418-snap-gene-0.1-mRNA-1	0	160.364	0	92.7058	0	52.2928	Bzip transcription factor
maker-pcu_contig_20-snap-gene-0.30-mRNA-1	0	100.942	158.27	92.5297	92.0418	98.5877	Conserved gene of unknown function
maker-pcu_contig_1875-fgenesh-gene-0.0-mRNA-1	0	153.464	0	92.4941	109.038	126.42	Peptidyl-prolyl cis-trans isomerase
maker-pcu_contig_3271-snap-gene-0.1-mRNA-1	0	131.389	191.482	92.4719	78.9914	89.1082	Conserved gene of unknown function
maker-pcu_contig_76-snap-gene-0.14-mRNA-1	0	83.5636	0	92.4423	0	16.207	Zinc carboxypeptidase family protein
maker-pcu_contig_10137-snap-gene-0.0-mRNA-1	0	0	0	92.4142	104.675	82.2023	WD repeat containing, antisense to TP53
maker-pcu_contig_80-snap-gene-0.20-mRNA-1	0	135.976	167.797	92.2414	113.162	160.429	Serine/threonine-protein phosphatase 2A regulatory subunit B'
maker-pcu_contig_747-snap-gene-0.5-mRNA-1	0	77.6901	0	92.1479	60.7199	55.6909	Mitochondrial Processing Peptidase alpha subunit
maker-pcu_contig_1331-fgenesh-gene-0.0-mRNA-1	0	0	0	92.1319	0	68.5047	Conserved gene of unknown function
maker-pcu_contig_1497-snap-gene-0.2-mRNA-1	0	162.746	262.847	91.8979	88.3311	65.1196	Histidine ammonia-lyase
maker-pcu_contig_53-fgenesh-gene-0.1-mRNA-1	0	53.1567	142.664	91.8898	90.7635	96.0547	Chromodomain-helicase-DNA-binding protein
maker-pcu_contig_462-snap-gene-0.5-mRNA-1	0	0	157.369	91.8637	109.821	82.0448	Protoheme IX farnesyltransferase
maker-pcu_contig_101-snap-gene-0.17-mRNA-1	0	144.192	87.4728	91.62	87.205	149.873	Major Facilitator Superfamily (MFS)
maker-pcu_contig_3850-snap-gene-0.1-mRNA-1	0	0	0	91.5438	143.898	127.107	Conserved gene of unknown function
maker-pcu_contig_21263-snap-gene-0.0-mRNA-1	0	0	0	91.5438	0	30.1993	Conserved gene of unknown function
maker-pcu_contig_26680-snap-gene-0.0-mRNA-1	0	160.354	0	91.325	0	0	Calcineurin-like phosphoesterase
maker-pcu_contig_481-snap-gene-0.10-mRNA-1	0	77.9391	0	91.2111	81.2193	63.7529	Dihydroorotase
maker-pcu_contig_707-snap-gene-0.4-mRNA-1	0	57.9729	0	91.0897	34.3255	69.5157	Pyruvate kinase
maker-pcu_contig_852-fgenesh-gene-0.3-mRNA-1	0	91.4955	119.549	90.8708	56.8827	84.6348	Glycoside hydrolase
maker-pcu_contig_592-snap-gene-0.4-mRNA-1	0	0	0	90.8181	38.7961	29.5546	WD repeat-containing protein 43
maker-pcu_contig_66-snap-gene-0.11-mRNA-1	0	148.592	0	90.7154	72.5837	100.208	Whole genome shotgun sequence assembly, scaffold_39, strain Mel28
maker-pcu_contig_607-snap-gene-0.12-mRNA-1	0	67.2791	99.3736	90.628	95.2591	76.2621	DNA-directed RNA polymerase
maker-pcu_contig_1341-snap-gene-0.4-mRNA-1	0	77.1051	88.1528	90.6253	69.0509	83.5869	Cleft lip and palate transmembrane family protein
maker-pcu_contig_252-snap-gene-0.7-mRNA-1	0	37.0282	0	90.6001	82.4914	141.185	Salivary gland secretion protein 4
maker-pcu_contig_470-snap-gene-0.10-mRNA-1	0	47.2952	0	90.5659	63.9766	36.4898	TRNA (Uracil-5-)-methyltransferase
maker-pcu_contig_518-fgenesh-gene-0.1-mRNA-1	0	47.8082	0	90.553	65.1061	51.7014	Orotidine 5'-phosphate decarboxylase
maker-pcu_contig_686-snap-gene-0.6-mRNA-1	0	0	0	90.5489	115.604	95.7678	GPN-loop GTPase
maker-pcu_contig_1928-snap-gene-0.2-mRNA-1	0	107.68	111.586	90.5489	110.032	126.094	Conserved gene of unknown function
maker-pcu_contig_9481-snap-gene-0.1-mRNA-1	0	0	0	90.4937	0	0	Aldose 1-epimerase
maker-pcu_contig_72-snap-gene-0.25-mRNA-1	0	0	0	90.2924	267.81	345.196	Unnamed protein product
maker-pcu_contig_1058-fgenesh-gene-0.1-mRNA-1	0	111.426	105.321	90.2905	80.2929	131.061	Trehalose-phosphatase
maker-pcu_contig_1907-snap-gene-0.3-mRNA-1	0	0	0	90.113	115.336	56.6065	Glycerol-3-phosphate dehydrogenase
maker-pcu_contig_21914-snap-gene-0.0-mRNA-1	0	0	0	90.0074	0	0	Thioredoxin reductase 1
maker-pcu_contig_17513-snap-gene-0.0-mRNA-1	0	0	0	89.922	0	69.3208	Cytochrome P450
maker-pcu_contig_812-fgenesh-gene-0.3-mRNA-1	0	0	0	89.7007	0	64.2202	Dihydropteridine reductase
maker-pcu_contig_425-snap-gene-0.10-mRNA-1	0	0	115.119	89.6932	57.3832	84.744	U2 small nuclear ribonucleoprotein A'
maker-pcu_contig_117-snap-gene-0.10-mRNA-1	0	76.4131	0	89.6606	0	54.7897	Actin
maker-pcu_contig_6327-snap-gene-0.2-mRNA-1	0	225.353	0	89.5564	87.1467	64.6609	Carbohydrate-binding protein
maker-pcu_contig_18366-snap-gene-0.0-mRNA-1	0	0	0	89.5163	0	0	Necrosis-inducing
maker-pcu_contig_9616-snap-gene-0.0-mRNA-1	0	87.9458	0	89.4817	0	69.402	Conserved gene of unknown function
maker-pcu_contig_2163-fgenesh-gene-0.0-mRNA-1	0	131.728	149.168	89.3901	205.908	148.129	Sister of ramosa 3
maker-pcu_contig_621-fgenesh-gene-0.0-mRNA-1	0	206.865	117.126	89.3245	0	40.506	FAD-dependent oxidoreductase domain-containing protein
maker-pcu_contig_6-snap-gene-0.22-mRNA-1	0	56.5868	111.904	89.2825	122.519	117.584	Vacuolar protein sorting-associated protein 8
maker-pcu_contig_822-snap-gene-0.3-mRNA-1	0	203.733	209.157	89.0779	0	108.867	Rab7 family GTPase
maker-pcu_contig_450-snap-gene-0.12-mRNA-1	0	43.8144	62.9731	89.0619	79.9023	52.7492	Vacuolar protein sorting-associated protein 33A
maker-pcu_contig_850-snap-gene-0.2-mRNA-1	0	74.0109	69.6263	88.7142	86.7665	82.2712	Phosphatidylinositol-4-phosphate-5-kinase (Pi-PIPKD5)
maker-pcu_contig_585-snap-gene-0.1-mRNA-1	0	137.067	276.781	88.7119	0	52.7207	M96 mating-specific protein family
maker-pcu_contig_602-snap-gene-0.10-mRNA-1	0	55.805	45.572	88.5918	79.5069	78.4564	Myb-like DNA-binding protein
maker-pcu_contig_8604-snap-gene-0.0-mRNA-1	0	0	173.368	88.5352	84.6052	116.688	Conserved gene of unknown function
maker-pcu_contig_473-snap-gene-0.4-mRNA-1	0	81.235	38.8326	88.5259	92.9129	59.5816	Phospholipid-transporting ATPase
maker-pcu_contig_3837-snap-gene-0.3-mRNA-1	0	109.66	0	88.3894	89.2772	110.212	Conserved gene of unknown function
maker-pcu_contig_227-snap-gene-0.8-mRNA-1	0	0	0	88.3835	73.1383	82.1136	Conserved gene of unknown function
maker-pcu_contig_523-snap-gene-0.6-mRNA-1	0	89.9019	87.1526	88.376	134.106	326.105	Sulfate Permease (SulP) Family
maker-pcu_contig_13-snap-gene-0.24-mRNA-1	0	69.3286	128.329	88.1235	94.0709	143.325	Protein pns1
maker-pcu_contig_455-snap-gene-0.4-mRNA-1	0	0	0	88.1235	53.7056	56.8092	ATP-binding Cassette (ABC) superfamily
maker-pcu_contig_366-fgenesh-gene-0.2-mRNA-1	0	70.2804	61.2193	88.1065	112.909	89.3229	Endomembrane protein 70
maker-pcu_contig_870-snap-gene-0.4-mRNA-1	0	41.5049	47.8506	88.0261	108.129	84.2704	GJ15230
maker-pcu_contig_1884-snap-gene-0.1-mRNA-1	0	0	0	88.0151	182.714	198.588	Hsf transcription factor
maker-pcu_contig_91-snap-gene-0.19-mRNA-1	0	70.4841	0	87.9839	100.16	81.7964	ADP-ribosylation factor GTPase-activating protein
maker-pcu_contig_204-fgenesh-gene-0.0-mRNA-1	0	57.5278	0	87.7475	71.1894	82.4932	Carbohydrate-binding protein
maker-pcu_contig_769-snap-gene-0.2-mRNA-1	0	0	0	87.6539	111.928	78.2851	GG20088
maker-pcu_contig_1027-snap-gene-0.6-mRNA-1	0	119.412	0	87.3952	108.883	86.9549	Pc20g08430 protein
maker-pcu_contig_92-fgenesh-gene-0.8-mRNA-1	0	0	0	87.3296	151.994	170.172	Conserved gene of unknown function
maker-pcu_contig_3727-snap-gene-0.4-mRNA-1	0	106.224	0	87.3216	122.402	82.0929	Calcium-binding protein
maker-pcu_contig_1303-snap-gene-0.3-mRNA-1	0	89.2809	89.7347	87.1647	103.997	104.48	Ferredoxin-dependent glutamate synthase
maker-pcu_contig_37-snap-gene-0.16-mRNA-1	0	0	0	87.0575	116.727	81.8446	Conserved gene of unknown function
maker-pcu_contig_4-snap-gene-0.14-mRNA-1	0	51.1399	96.8887	87.0012	84.9344	70.6827	GTPase activator protein
maker-pcu_contig_760-snap-gene-0.1-mRNA-1	0	43.8144	70.2593	86.9607	72.6384	69.8708	Dual adaptor for phosphotyrosine and 3-phosphoinositides 1 (Predicted)
maker-pcu_contig_736-snap-gene-0.2-mRNA-1	0	0	198.58	86.9504	115.484	87.1935	Conserved gene of unknown function
maker-pcu_contig_117-fgenesh-gene-0.2-mRNA-1	0	0	0	86.7883	55.5711	28.2432	Histidinol dehydrogenase
maker-pcu_contig_41-snap-gene-0.8-mRNA-1	0	64.4586	75.7999	86.7153	69.2706	56.5276	P-type ATPase (P-ATPase) Superfamily
maker-pcu_contig_39-fgenesh-gene-0.4-mRNA-1	0	194.814	113.637	86.5961	231.109	343.919	SGT1a
maker-pcu_contig_575-snap-gene-0.2-mRNA-1	0	46.7423	43.111	86.5775	71.6317	64.9834	Exportin-2
maker-pcu_contig_721-fgenesh-gene-0.0-mRNA-1	0	0	0	86.5168	0	48.8018	FHA domain-interacting nucleolar phosphoprotein
maker-pcu_contig_905-fgenesh-gene-0.0-mRNA-1	0	0	0	86.3956	79.6535	97.4668	GTPase
maker-pcu_contig_159-fgenesh-gene-0.5-mRNA-1	0	29.3153	61.2857	86.3581	76.3726	66.3494	Eukaryotic peptide chain release factor subunit 1
maker-pcu_contig_1991-snap-gene-0.7-mRNA-1	0	0	144.019	86.305	55.2224	79.1087	Arsenite-Antimonite (ArsAB) Efflux Family
maker-pcu_contig_1374-snap-gene-0.3-mRNA-1	0	197.355	0	86.2748	91.8132	101.386	Transmembrane protein
maker-pcu_contig_9608-snap-gene-0.0-mRNA-1	0	84.808	58.8523	86.2307	27.6056	28.496	Major Facilitator Superfamily (MFS)
maker-pcu_contig_911-fgenesh-gene-0.1-mRNA-1	0	0	0	86.2284	84.7393	63.6049	Conserved gene of unknown function
maker-pcu_contig_1530-snap-gene-0.4-mRNA-1	0	82.4772	77.8305	86.1608	74.6008	74.8717	Liver stage antigen
maker-pcu_contig_234-snap-gene-0.11-mRNA-1	0	0	0	86.1543	73.425	58.3167	3-mercaptopyruvate sulfurtransferase
maker-pcu_contig_2463-snap-gene-0.1-mRNA-1	0	0	83.7317	86.1349	62.3345	108.7	Gene of unknown function
maker-pcu_contig_436-snap-gene-0.9-mRNA-1	0	0	0	86.0559	60.1434	74.2837	Sialidase
maker-pcu_contig_2650-snap-gene-0.3-mRNA-1	0	0	0	86.0341	77.0694	38.8236	3'(2'),5'-bisphosphate nucleotidase
maker-pcu_contig_402-snap-gene-0.11-mRNA-1	0	46.1774	80.4476	86.0014	54.1359	71.4435	Cell division protease ftsH
maker-pcu_contig_13172-snap-gene-0.1-mRNA-1	0	0	0	85.9675	72.5907	35.2895	Conserved gene of unknown function
maker-pcu_contig_14420-snap-gene-0.0-mRNA-1	0	0	121.921	85.9369	98.3935	85.4777	Inositol-3,4-bisphosphate 4-phosphatase
maker-pcu_contig_18-snap-gene-0.10-mRNA-1	0	61.3137	92.931	85.9351	110.217	92.0297	CGMP-dependent protein kinase
maker-pcu_contig_71-snap-gene-0.21-mRNA-1	0	0	0	85.8132	109.633	113.565	Myb-like DNA-binding protein
maker-pcu_contig_102-snap-gene-0.10-mRNA-1	0	39.5739	79.0822	85.6989	78.8401	80.6798	AAA family ATPase
maker-pcu_contig_597-fgenesh-gene-0.0-mRNA-1	0	0	0	85.5642	0	43.7397	GL26419
maker-pcu_contig_727-snap-gene-0.4-mRNA-1	0	84.1211	0	85.5483	101.75	113.745	COP9 signalosome complex subunit 2
maker-pcu_contig_53-fgenesh-gene-0.2-mRNA-1	0	0	0	85.4019	0	29.6449	Ribosome biogenesis protein NEP1
maker-pcu_contig_381-snap-gene-0.15-mRNA-1	0	80.182	0	85.2894	111.561	103.54	Oxidoreductase family
maker-pcu_contig_935-snap-gene-0.5-mRNA-1	0	40.2933	0	85.2848	34.9909	42.8151	Conserved gene of unknown function
maker-pcu_contig_109-snap-gene-0.17-mRNA-1	0	88.5611	0	85.2808	60.716	78.6406	Crinkler (CRN) family protein
maker-pcu_contig_5-snap-gene-0.33-mRNA-1	0	110.42	117.558	85.1994	74.5808	123.663	YALI0F06864p
maker-pcu_contig_1-fgenesh-gene-0.18-mRNA-1	0	0	0	85.1349	0	116.92	C2 domain-containing protein
maker-pcu_contig_27-snap-gene-0.18-mRNA-1	0	85.6919	76.3402	85.0984	68.4959	57.4904	Glucosamine-fructose-6-phosphate aminotransferase [isomerizing]
maker-pcu_contig_28007-snap-gene-0.0-mRNA-1	0	193.145	0	85.0809	0	20.7843	Conserved gene of unknown function
maker-pcu_contig_2420-snap-gene-0.2-mRNA-1	0	52.2947	0	85.0664	57.9015	94.4678	Phenylalanyl-tRNA synthetase alpha chain
maker-pcu_contig_3257-fgenesh-gene-0.0-mRNA-1	0	0	0	84.9946	0	59.0069	Rab6 family GTPase
maker-pcu_contig_443-snap-gene-0.5-mRNA-1	0	149.221	85.7881	84.9801	108.851	112.134	NIPA-like domain containing 2
maker-pcu_contig_239-snap-gene-0.12-mRNA-1	0	120.183	0	84.8974	82.6243	74.7058	Conserved gene of unknown function
maker-pcu_contig_12138-fgenesh-gene-0.0-mRNA-1	0	0	217.351	84.8719	196.987	272.011	GG19876
maker-pcu_contig_3502-snap-gene-0.1-mRNA-1	0	0	0	84.8438	76.6035	98.5314	H-translocating Pyrophosphatase (H-PPase) Family
maker-pcu_contig_105-snap-gene-0.16-mRNA-1	0	0	0	84.8438	63.8362	73.1947	Protein kinase
maker-pcu_contig_310-snap-gene-0.9-mRNA-1	0	0	0	84.7924	74.5466	101.637	Conserved gene of unknown function
maker-pcu_contig_1092-snap-gene-0.2-mRNA-1	0	0	0	84.7924	58.1843	40.9963	Type II (General) Secretory Pathway (IISP) Family
maker-pcu_contig_25-snap-gene-0.33-mRNA-1	0	0	94.0371	84.5803	84.9603	58.6697	Signal recognition particle receptor subunit alpha
maker-pcu_contig_790-fgenesh-gene-0.1-mRNA-1	0	97.6587	242.443	84.5361	146.293	136.041	Inositol monophosphatase
maker-pcu_contig_1227-snap-gene-0.6-mRNA-1	0	165.422	0	84.3969	0	82.2285	Conserved gene of unknown function
maker-pcu_contig_213-fgenesh-gene-0.1-mRNA-1	0	0	0	84.2958	76.9571	39.0581	Lupus la ribonucleoprotein
maker-pcu_contig_3783-snap-gene-0.1-mRNA-1	0	0	0	84.2305	278.856	106.204	HSF-type DNA-binding protein
maker-pcu_contig_744-fgenesh-gene-0.2-mRNA-1	0	103.257	134.916	84.1418	67.2517	120.138	Rab21/Rab5 family GTPase
maker-pcu_contig_52-snap-gene-0.22-mRNA-1	0	52.9406	63.1576	84.1179	92.9473	83.6941	Pre-mRNA-processing-splicing factor 8
maker-pcu_contig_458-fgenesh-gene-0.0-mRNA-1	0	0	0	84.088	94.2724	131.178	Serine palmitoyltransferase
maker-pcu_contig_15824-snap-gene-0.2-mRNA-1	0	0	0	84.0701	137.899	121.338	Cysteine protease family C01A
maker-pcu_contig_12-snap-gene-0.30-mRNA-1	0	40.6009	0	83.9572	30.2211	34.0645	Adherance factor
maker-pcu_contig_2200-snap-gene-0.3-mRNA-1	0	0	0	83.8371	56.4626	67.2019	GH20509
maker-pcu_contig_9207-snap-gene-0.0-mRNA-1	0	139.099	0	83.7956	156.483	99.9875	Conserved gene of unknown function
maker-pcu_contig_286-snap-gene-0.2-mRNA-1	0	30.245	64.6665	83.7847	68.0501	55.1374	Phosphatidylinositol-4-phosphate-5-kinase (PIPK-D1/GPCR-PIPK)
maker-pcu_contig_5178-snap-gene-0.0-mRNA-1	0	251.933	157.433	83.6994	149.817	47.2125	Glucanase inhibitor protein 1
maker-pcu_contig_1006-fgenesh-gene-0.0-mRNA-1	0	142.397	0	83.6994	99.8778	119.605	Conserved gene of unknown function
maker-pcu_contig_302-fgenesh-gene-0.0-mRNA-1	0	82.2632	0	83.6427	71.4378	97.5065	Mitochondrial Carrier (MC) Family
maker-pcu_contig_507-snap-gene-0.4-mRNA-1	0	0	0	83.5681	78.7949	55.8219	Conserved gene of unknown function
maker-pcu_contig_77-snap-gene-0.23-mRNA-1	0	0	112.55	83.3008	61.7129	76.6642	COP9 signalosome complex subunit
maker-pcu_contig_16-snap-gene-0.13-mRNA-1	0	61.9108	62.6922	83.2858	82.6616	94.4016	Myoferlin
maker-pcu_contig_80-fgenesh-gene-0.2-mRNA-1	0	0	102.978	83.2351	90.8174	66.9481	Cyclophilin
maker-pcu_contig_25900-snap-gene-0.2-mRNA-1	0	0	0	83.1593	0	5.79207	Enolase
maker-pcu_contig_321-fgenesh-gene-0.4-mRNA-1	0	63.562	87.0054	83.0173	108.424	79.7807	Sporangia induced Bardet-Biedl syndrome 4 protein
maker-pcu_contig_507-fgenesh-gene-0.1-mRNA-1	0	75.3237	82.0155	82.9291	62.6861	115.746	Guanylate kinase
maker-pcu_contig_133-snap-gene-0.7-mRNA-1	0	0	203.299	82.9271	110.99	108.432	Inositol-3,4-bisphosphate 4-phosphatase
maker-pcu_contig_570-snap-gene-0.5-mRNA-1	0	162.724	146.173	82.8701	66.2391	197.205	Conserved gene of unknown function
maker-pcu_contig_3476-snap-gene-0.3-mRNA-1	0	0	0	82.8403	151.268	135.177	Isoamyl acetate-hydrolyzing esterase 1
maker-pcu_contig_581-snap-gene-0.11-mRNA-1	0	134.505	0	82.8248	69.1606	74.1413	Aspartate-semialdehyde dehydrogenase
maker-pcu_contig_253-fgenesh-gene-0.6-mRNA-1	0	0	176.81	82.8006	0	138.171	Charged multivesicular body protein 1b-2
maker-pcu_contig_2733-snap-gene-0.1-mRNA-1	0	75.5909	0	82.7808	75.7426	53.365	Amine oxidase
maker-pcu_contig_584-snap-gene-0.3-mRNA-1	0	0	0	82.6896	0	60.6358	Pantoate beta-alanine ligase
maker-pcu_contig_1000-snap-gene-0.3-mRNA-1	0	145.049	0	82.5092	88.9138	104.105	Hydroxymethylglutaryl-CoA lyase, mitochondrial
maker-pcu_contig_964-snap-gene-0.6-mRNA-1	0	0	0	82.394	55.898	49.551	GPI mannosyltransferase 4
maker-pcu_contig_2713-snap-gene-0.0-mRNA-1	0	0	0	82.3919	64.2134	95.9786	Peptidase M24
maker-pcu_contig_482-snap-gene-0.9-mRNA-1	0	0	0	82.3584	0	46.4561	Ribosome biogenesis protein NSA2
maker-pcu_contig_592-snap-gene-0.6-mRNA-1	0	0	86.1688	82.3096	0	31.8122	Chaperone protein dnaJ
maker-pcu_contig_1952-snap-gene-0.1-mRNA-1	0	0	0	82.3073	204.243	203.278	Myosin
maker-pcu_contig_1390-snap-gene-0.4-mRNA-1	0	0	0	82.2486	164.36	76.8404	Conserved gene of unknown function
maker-pcu_contig_1433-snap-gene-0.2-mRNA-1	0	0	0	82.2486	78.893	92.7884	Conserved gene of unknown function
maker-pcu_contig_129-fgenesh-gene-0.5-mRNA-1	0	0	115.223	82.2486	57.4353	55.8839	Arginine N-methyltransferase
maker-pcu_contig_1747-snap-gene-0.5-mRNA-1	0	0	0	82.2486	0	27.8365	Nuclear nucleic acid-binding protein C1D
maker-pcu_contig_261-snap-gene-0.6-mRNA-1	0	59.2184	86.8498	82.1995	96.8165	46.7125	Glycosyltransferase
maker-pcu_contig_1394-fgenesh-gene-0.0-mRNA-1	0	58.7722	70.3929	82.149	73.3673	106.016	Soluble pyridine nucleotide transhydrogenase
maker-pcu_contig_3962-snap-gene-0.2-mRNA-1	0	0	196.388	82.0299	69.9239	120.304	Dihydrolipoyllysine-residue acetyltransferase component of pyruvate dehydrogenase complex
maker-pcu_contig_38-snap-gene-0.18-mRNA-1	0	102.603	0	82.0249	81.1459	104.103	Stomatin
maker-pcu_contig_6302-fgenesh-gene-0.0-mRNA-1	0	0	0	81.9897	0	346.861	MtN3
maker-pcu_contig_2688-snap-gene-0.3-mRNA-1	0	0	0	81.9754	113.439	86.7001	THO complex 7 homolog
maker-pcu_contig_650-snap-gene-0.6-mRNA-1	0	80.5199	87.6733	81.9073	69.9239	77.9654	Phosphoglycerate kinase
maker-pcu_contig_1252-snap-gene-0.4-mRNA-1	0	0	0	81.8708	0	69.2716	ATP-binding Cassette (ABC) Superfamily
maker-pcu_contig_909-snap-gene-0.7-mRNA-1	0	0	0	81.7942	87.2124	34.6034	Homeobox protein Meis3 variant
maker-pcu_contig_1891-fgenesh-gene-0.2-mRNA-1	0	114.649	0	81.7813	0	69.1959	Mediator of RNA polymerase II transcription subunit
maker-pcu_contig_463-snap-gene-0.9-mRNA-1	0	0	0	81.7039	69.6472	124.435	Dehydrogenase
maker-pcu_contig_234-snap-gene-0.9-mRNA-1	0	72.167	55.7192	81.6488	96.1419	105.74	HECT E3 ubiquitin ligase
maker-pcu_contig_126-snap-gene-0.31-mRNA-1	0	0	0	81.5689	0	30.6739	Conserved gene of unknown function
maker-pcu_contig_190-snap-gene-0.6-mRNA-1	0	58.9725	63.7688	81.5672	83.4403	98.4261	Ras-specific guanine nucleotide-releasing factor
maker-pcu_contig_130-snap-gene-0.7-mRNA-1	0	62.0146	0	81.5444	90.2843	108.197	Tubulin binding cofactor C
maker-pcu_contig_14858-snap-gene-0.0-mRNA-1	0	0	429.528	81.2922	116.229	171.281	Crinkler (CRN) family protein
maker-pcu_contig_18733-snap-gene-0.0-mRNA-1	0	0	0	81.0902	0	67.3135	M96 mating-specific protein family
maker-pcu_contig_9993-fgenesh-gene-0.0-mRNA-1	0	0	0	81.0597	103.65	53.3442	1-(5-phosphoribosyl)-5-[(5-phosphoribosylamino)methylideneamino] imidazole-4-carboxamide isomerase
maker-pcu_contig_14180-snap-gene-0.1-mRNA-1	0	0	0	81.0597	0	88.3989	Alcohol dehydrogenase
maker-pcu_contig_3225-snap-gene-0.2-mRNA-1	0	0	0	80.8546	0	63.6937	Inosine-5'-monophosphate dehydrogenase
maker-pcu_contig_3091-snap-gene-0.4-mRNA-1	0	0	0	80.7799	0	31.0675	RWD domain containing 1
maker-pcu_contig_883-snap-gene-0.5-mRNA-1	0	0	0	80.7018	0	66.3858	Conserved gene of unknown function
maker-pcu_contig_656-snap-gene-0.6-mRNA-1	0	0	0	80.3732	0	37.7803	Conserved gene of unknown function
maker-pcu_contig_2813-snap-gene-0.1-mRNA-1	0	120.427	181.559	80.1735	193.07	156.953	DSBA-like thioredoxin domain containing protein
maker-pcu_contig_828-snap-gene-0.6-mRNA-1	0	0	0	80.1735	72.4012	109.069	Sorting nexin-22
maker-pcu_contig_795-snap-gene-0.2-mRNA-1	0	0	0	80.1485	0	89.8135	Myosin
maker-pcu_contig_668-snap-gene-0.2-mRNA-1	0	40.333	92.2239	79.971	85.3744	84.8058	Recoverin family protein DDB_G0274781
maker-pcu_contig_1274-snap-gene-0.5-mRNA-1	0	0	0	79.853	79.003	42.9955	Chromatin remodeling complex subunit
maker-pcu_contig_737-snap-gene-0.6-mRNA-1	0	54.9967	0	79.54	35.8196	78.2129	Acetolactate synthase
maker-pcu_contig_17451-snap-gene-0.0-mRNA-1	0	566.83	0	79.5022	110.754	36.6914	Phosphoglycerate kinase
maker-pcu_contig_3539-snap-gene-0.3-mRNA-1	0	0	0	79.4875	112.439	100.293	Zinc finger CCCH domain-containing protein 21
maker-pcu_contig_208-snap-gene-0.8-mRNA-1	0	0	0	79.4011	80.6797	35.5215	Malonyl-CoA decarboxylase (MCD)
maker-pcu_contig_512-fgenesh-gene-0.3-mRNA-1	0	0	0	79.3906	0	127.629	Conserved gene of unknown function
maker-pcu_contig_2861-snap-gene-0.3-mRNA-1	0	0	0	79.3199	77.9802	82.6009	Conserved gene of unknown function
maker-pcu_contig_313-snap-gene-0.7-mRNA-1	0	0	0	79.3112	67.731	46.3942	Amino acid transporter
maker-pcu_contig_10774-snap-gene-0.0-mRNA-1	0	0	203.661	79.2936	177.071	111.3	Inositol-3,4-bisphosphate 4-phosphatase
maker-pcu_contig_1125-snap-gene-0.5-mRNA-1	0	84.9503	0	79.2237	64.5499	101.563	CDP-alcohol phosphatidyltransferase superfamily
maker-pcu_contig_182-snap-gene-0.14-mRNA-1	0	0	169.184	79.2122	0	72.6073	Bromodomain containing protein
maker-pcu_contig_4493-snap-gene-0.2-mRNA-1	0	85.0868	69.8862	79.0852	93.4204	113.26	Cell 5A endo-1,4-betaglucanase
maker-pcu_contig_8251-fgenesh-gene-0.0-mRNA-1	0	155.065	0	79.0852	0	109.497	Bax inhibitor
maker-pcu_contig_10-snap-gene-0.37-mRNA-1	0	75.2383	104.861	79.0362	58.8036	49.6156	Imidazole glycerol phosphate synthase hisHF
maker-pcu_contig_1266-fgenesh-gene-0.0-mRNA-1	0	51.8085	80.0012	78.9931	58.2835	19.5785	Ribosomal RNA processing protein 1
maker-pcu_contig_705-snap-gene-0.8-mRNA-1	0	0	0	78.9684	163.036	116.499	Conserved gene of unknown function
maker-pcu_contig_1832-snap-gene-0.3-mRNA-1	0	0	0	78.8829	80.702	25.2142	Conserved gene of unknown function
maker-pcu_contig_1776-snap-gene-0.5-mRNA-1	0	116.238	0	78.8577	95.8947	97.8593	Conserved gene of unknown function
maker-pcu_contig_1480-fgenesh-gene-0.0-mRNA-1	0	0	0	78.8325	100.717	74.1121	Hypoxanthine-guanine phosphoribosyltransferase
maker-pcu_contig_1049-fgenesh-gene-0.3-mRNA-1	0	105.903	0	78.7663	0	92.3675	Nucleotide-binding protein 1
maker-pcu_contig_2975-snap-gene-0.2-mRNA-1	0	0	41.9166	78.7458	45.2707	55.9059	FK506-binding protein 15
maker-pcu_contig_19-snap-gene-0.36-mRNA-1	0	56.7552	0	78.6817	0	28.8484	Conserved gene of unknown function
maker-pcu_contig_725-snap-gene-0.5-mRNA-1	0	0	0	78.6813	0	72.9283	Serine/threonine-protein phosphatase
maker-pcu_contig_742-snap-gene-0.4-mRNA-1	0	145.627	0	78.6349	59.2842	236.541	E3 ubiquitin-protein ligase XBAT35
maker-pcu_contig_3308-snap-gene-0.0-mRNA-1	0	0	41.6497	78.6156	64.5025	80.3752	Conserved gene of unknown function
maker-pcu_contig_8605-snap-gene-0.0-mRNA-1	0	0	105.531	78.6042	105.208	84.1364	Calpain
maker-pcu_contig_20-fgenesh-gene-0.13-mRNA-1	0	123.437	0	78.5815	87.0943	144.797	Transmembrane protein
maker-pcu_contig_273-snap-gene-0.10-mRNA-1	0	54.768	63.1415	78.5502	119.602	41.0772	Sulfatase
maker-pcu_contig_428-snap-gene-0.5-mRNA-1	0	43.4481	47.6864	78.5253	67.915	59.7222	Nuclear pore complex protein Nup155
maker-pcu_contig_2286-snap-gene-0.2-mRNA-1	0	0	0	78.4609	254.773	184.279	Ribulose-1,5-bisphosphate carboxylase/oxygenase small subunit N-methyltransferase I
maker-pcu_contig_12-snap-gene-0.26-mRNA-1	0	50.5939	45.2307	78.4351	50.2952	54.541	Insulin-degrading-like enzyme, metalloprotease family M16A
maker-pcu_contig_3508-snap-gene-0.1-mRNA-1	0	122.035	92.314	78.3942	129.681	161.219	Cyclin
maker-pcu_contig_686-snap-gene-0.7-mRNA-1	0	71.137	72.2931	78.3129	48.9058	19.8217	GPN-loop GTPase
maker-pcu_contig_20-snap-gene-0.39-mRNA-1	0	0	69.4032	78.3063	0	43.4089	Arginine n-methyltransferase
maker-pcu_contig_1250-snap-gene-0.5-mRNA-1	0	0	0	78.2389	37.5971	52.0013	Cytoplasm protein
maker-pcu_contig_471-snap-gene-0.4-mRNA-1	0	51.3234	62.5889	78.2161	86.9105	63.7283	Glutamate carboxypeptidase
maker-pcu_contig_6683-snap-gene-0.1-mRNA-1	0	111.824	113.274	78.1663	61.885	92.2172	Transcription factor
maker-pcu_contig_1906-snap-gene-0.0-mRNA-1	0	94.0793	148.804	78.0204	67.7241	70.9826	M96 mating-specific protein family
maker-pcu_contig_1701-fgenesh-gene-0.0-mRNA-1	0	0	0	77.9854	79.7873	136.367	Aldo/keto reductase family
maker-pcu_contig_722-snap-gene-0.3-mRNA-1	0	32.8608	37.5649	77.8817	51.7224	50.2068	116 kDa U5 small nuclear ribonucleoprotein component
maker-pcu_contig_144-snap-gene-0.18-mRNA-1	0	58.9075	0	77.8756	72.8967	87.0102	Conserved gene of unknown function
maker-pcu_contig_5344-snap-gene-0.1-mRNA-1	0	131.207	0	77.8729	99.6982	101.448	Ubiquitin family protein
maker-pcu_contig_1296-fgenesh-gene-0.1-mRNA-1	0	45.0565	0	77.8523	79.2329	65.2257	Phosphoglucomutase
maker-pcu_contig_42-snap-gene-0.10-mRNA-1	0	0	189.552	77.7767	0	50.0117	Conserved gene of unknown function
maker-pcu_contig_157-fgenesh-gene-0.3-mRNA-1	0	0	86.8109	77.7206	60.5816	79.1027	Strictosidine synthase
maker-pcu_contig_263-snap-gene-0.5-mRNA-1	0	36.9159	93.0238	77.6688	85.8695	87.2441	Vesicle fusion protein
maker-pcu_contig_196-snap-gene-0.12-mRNA-1	0	0	50.989	77.6679	40.1363	17.9564	DEAD/DEAH box RNA helicase
maker-pcu_contig_131-snap-gene-0.17-mRNA-1	0	0	0	77.593	99.1768	87.5362	Ubiquitin carboxyl-terminal hydrolase
maker-pcu_contig_5974-snap-gene-0.1-mRNA-1	0	89.8921	0	77.593	0	78.2429	Mannitol dehydrogenase
maker-pcu_contig_178-snap-gene-0.8-mRNA-1	0	0	0	77.593	0	59.087	Der1-like family
maker-pcu_contig_851-snap-gene-0.3-mRNA-1	0	131.5	75.6004	77.5426	109.628	134.99	GF16814
maker-pcu_contig_2415-snap-gene-0.3-mRNA-1	0	0	0	77.507	58.3343	42.4337	Iojap-related protein
maker-pcu_contig_765-fgenesh-gene-0.0-mRNA-1	0	0	0	77.507	0	55.2924	Casein kinase II subunit beta
maker-pcu_contig_3903-snap-gene-0.0-mRNA-1	0	76.2289	79.681	77.4956	62.8877	75.0409	Conserved gene of unknown function
maker-pcu_contig_963-snap-gene-0.3-mRNA-1	0	0	170.364	77.4886	77.8443	148.299	High mobility group protein 1.2
maker-pcu_contig_464-snap-gene-0.3-mRNA-1	0	50.7662	0	77.3902	52.3517	67.9058	Importin subunit alpha
maker-pcu_contig_240-snap-gene-0.7-mRNA-1	0	0	155.495	77.3393	60.2852	55.9538	P-3 complex subunit mu
maker-pcu_contig_1859-snap-gene-0.1-mRNA-1	0	58.879	89.7537	77.3107	431.416	365.048	Major Facilitator Superfamily (MFS)
maker-pcu_contig_8449-fgenesh-gene-0.0-mRNA-1	0	0	0	77.2567	0	80.4524	Conserved gene of unknown function
maker-pcu_contig_155-snap-gene-0.9-mRNA-1	0	62.0649	145.97	77.2362	113.185	96.9139	N-terminal kinase
maker-pcu_contig_99-snap-gene-0.7-mRNA-1	0	0	70.9214	77.2115	40.0658	24.3689	Nucleolar complex protein
maker-pcu_contig_150-snap-gene-0.11-mRNA-1	0	0	0	77.1081	0	102.937	Aldo/keto reductase family
maker-pcu_contig_98-snap-gene-0.19-mRNA-1	0	0	0	77.1081	0	82.6397	Mitochondrial Protein Translocase (MPT) Family
maker-pcu_contig_288-fgenesh-gene-0.0-mRNA-1	0	0	0	77.0643	116.323	88.9156	Silencing group B protein
maker-pcu_contig_166-snap-gene-0.10-mRNA-1	0	49.971	94.8589	77.0423	128.957	150.077	Uniprot|Q07878 Saccharomyces cerevisiae YLL040c VPS13
maker-pcu_contig_95-snap-gene-0.12-mRNA-1	0	39.2083	81.9679	76.9919	114.063	73.0057	Nardilysin
maker-pcu_contig_1260-snap-gene-0.4-mRNA-1	0	102.434	110.565	76.9525	81.2193	98.3036	Phosphatidylinositide phosphatase SAC1
maker-pcu_contig_2403-snap-gene-0.0-mRNA-1	0	0	101.714	76.9086	39.4395	18.5944	Phosphatidylinositol-4-phosphate binding protein
maker-pcu_contig_10-fgenesh-gene-0.11-mRNA-1	0	0	0	76.8679	78.7214	105.146	U1 zinc finger protein
maker-pcu_contig_700-snap-gene-0.2-mRNA-1	0	49.2639	121.841	76.8178	120.322	91.952	DNA topoisomerase 2
maker-pcu_contig_211-snap-gene-0.11-mRNA-1	0	102.535	0	76.8166	42.1778	69.6377	Myosin
maker-pcu_contig_2831-snap-gene-0.0-mRNA-1	0	94.252	0	76.7782	153.467	41.9551	Conserved gene of unknown function
maker-pcu_contig_126-fgenesh-gene-0.3-mRNA-1	0	150.358	0	76.6724	0	82.5659	Phosducin
maker-pcu_contig_1249-snap-gene-0.3-mRNA-1	0	0	0	76.5952	28.0563	32.399	Elongation factor G, mitochondrial
maker-pcu_contig_1151-snap-gene-0.7-mRNA-1	0	0	0	76.5926	0	24.9252	Epsin-3 (EPS-15-interacting protein 3).
maker-pcu_contig_8443-snap-gene-0.1-mRNA-1	0	84.3086	228.166	76.5531	94.1324	108.815	Vacuolar fusion protein MON1 homolog A.
maker-pcu_contig_10021-fgenesh-gene-0.0-mRNA-1	0	0	0	76.5103	67.2906	95.7555	Peroxisomal 2,4-dienoyl-CoA reductase
maker-pcu_contig_2602-fgenesh-gene-0.0-mRNA-1	0	0	0	76.4392	0	56.0525	Developmentally-regulated GTP-binding protein 1
maker-pcu_contig_835-fgenesh-gene-0.0-mRNA-1	0	198.032	0	76.4134	124.532	117.553	Conserved gene of unknown function
maker-pcu_contig_195-fgenesh-gene-0.5-mRNA-1	0	63.5512	0	76.3737	131.699	184.748	Conserved gene of unknown function
maker-pcu_contig_7302-snap-gene-0.1-mRNA-1	0	0	135.878	76.3737	48.9168	64.6205	Mitotic spindle assembly checkpoint protein MAD1
maker-pcu_contig_20002-snap-gene-0.0-mRNA-1	0	0	0	76.2974	0	52.7181	Peroxidase
maker-pcu_contig_628-snap-gene-0.5-mRNA-1	0	27.2995	65.3945	76.2417	77.0478	80.4731	Pre-mRNA-splicing factor RSE1
maker-pcu_contig_11036-snap-gene-0.0-mRNA-1	0	0	119.61	76.2346	54.2018	63.3083	Cleavage and polyadenylation specificity factor subunit
maker-pcu_contig_4000-fgenesh-gene-0.0-mRNA-1	0	0	0	76.2346	0	26.5246	RRNA-processing protein EBP2
maker-pcu_contig_1270-snap-gene-0.3-mRNA-1	0	0	0	76.2346	0	23.8899	TPR repeat protein
maker-pcu_contig_37-snap-gene-0.22-mRNA-1	0	34.3725	44.9114	76.1855	101.759	122.208	Phospholipase D; Pi-TM-PLD
maker-pcu_contig_584-snap-gene-0.4-mRNA-1	0	94.9741	0	76.0874	104.681	59.6676	Gastricsin, aspartyl protease family A01A
maker-pcu_contig_1590-snap-gene-0.4-mRNA-1	0	0	0	75.9552	0	93.3393	Chitobiosyldiphosphodolichol beta-mannosyltransferase
maker-pcu_contig_1088-snap-gene-0.4-mRNA-1	0	70.0375	97.6123	75.9364	124.683	134.524	RING finger protein 11
maker-pcu_contig_606-fgenesh-gene-0.3-mRNA-1	0	0	0	75.9006	0	54.4898	FUN14 family protein
maker-pcu_contig_3272-snap-gene-0.1-mRNA-1	0	65.928	58.9393	75.7971	102.163	72.087	LIPOPROTEIN VSAC
maker-pcu_contig_1584-snap-gene-0.2-mRNA-1	0	0	0	75.6744	78.7949	72.0324	Mannosyl-oligosaccharide alpha-1,2-mannosidase
maker-pcu_contig_1008-snap-gene-0.5-mRNA-1	0	0	0	75.6718	0	70.8265	Lipase
maker-pcu_contig_1-snap-gene-0.50-mRNA-1	0	41.9983	0	75.6532	49.7339	41.5797	Hsp70
maker-pcu_contig_34-snap-gene-0.24-mRNA-1	0	65.3098	0	75.5758	66.1679	54.0676	UPF0663 transmembrane protein
maker-pcu_contig_103-snap-gene-0.17-mRNA-1	0	0	0	75.5625	79.2329	83.9539	Calcineurin-like phosphoesterase
maker-pcu_contig_870-snap-gene-0.8-mRNA-1	0	80.438	129.355	75.5152	76.5694	116.694	Histone deacetylase
maker-pcu_contig_888-snap-gene-0.5-mRNA-1	0	49.5154	0	75.5036	128.998	278.252	Inositol oxygenase
maker-pcu_contig_1000-snap-gene-0.2-mRNA-1	0	20.6876	69.2659	75.4755	64.0012	34.7994	HEAT repeat containing 1
maker-pcu_contig_345-snap-gene-0.12-mRNA-1	0	0	0	75.4245	73.5785	73.9471	Spen homolog, transcriptional regulator (Drosophila)
maker-pcu_contig_38-snap-gene-0.11-mRNA-1	0	0	0	75.4113	0	55.2987	Conserved gene of unknown function
maker-pcu_contig_839-snap-gene-0.8-mRNA-1	0	33.9796	84.7597	75.3135	42.2501	5.75281	Sulfatase
maker-pcu_contig_2207-snap-gene-0.0-mRNA-1	0	0	0	75.2848	0	25.2142	Conserved gene of unknown function
maker-pcu_contig_359-snap-gene-0.5-mRNA-1	0	0	0	75.2274	80.1101	95.4759	Ribose-5-phosphate isomerase
maker-pcu_contig_480-fgenesh-gene-0.1-mRNA-1	0	0	0	75.2274	50.4534	58.5989	Conserved gene of unknown function
maker-pcu_contig_431-snap-gene-0.10-mRNA-1	0	65.7661	60.1513	75.1663	98.5176	76.5536	RNA-binding protein
maker-pcu_contig_1510-snap-gene-0.3-mRNA-1	0	0	0	75.131	96.1705	63.569	Ubiquinone biosynthesis protein COQ9
maker-pcu_contig_5-snap-gene-0.27-mRNA-1	0	108.801	0	75.131	86.0473	83.6434	Drug/Metabolite Transporter (DMT) Superfamily
maker-pcu_contig_197-snap-gene-0.9-mRNA-1	0	0	0	75.131	0	24.5354	Gene of unknown function
maker-pcu_contig_1858-snap-gene-0.6-mRNA-1	0	0	0	75.09	60.9392	62.1225	Calponin domain-containing protein
maker-pcu_contig_390-snap-gene-0.5-mRNA-1	0	0	128.635	75.0748	81.9318	90.1848	Lipase
maker-pcu_contig_1440-snap-gene-0.1-mRNA-1	0	0	0	75.0639	102.843	151.22	Conserved gene of unknown function
maker-pcu_contig_314-snap-gene-0.6-mRNA-1	0	67.5985	80.2952	74.9987	88.0543	84.6095	C2orf29 protein
maker-pcu_contig_2250-snap-gene-0.2-mRNA-1	0	0	131.627	74.9149	100.942	34.4732	Drug/Metabolite Transporter (DMT) Superfamily
maker-pcu_contig_1126-fgenesh-gene-0.0-mRNA-1	0	0	0	74.9124	0	48.813	Biotin-protein ligase
maker-pcu_contig_643-snap-gene-0.5-mRNA-1	0	0	0	74.8849	0	49.2806	Conserved gene of unknown function
maker-pcu_contig_273-snap-gene-0.8-mRNA-1	0	0	0	74.845	64.8239	47.9232	Sel-1 family protein
maker-pcu_contig_609-fgenesh-gene-0.1-mRNA-1	0	0	0	74.7715	73.1667	79.3911	Translation initiation factor eIF-2B subunit gamma
maker-pcu_contig_478-snap-gene-0.8-mRNA-1	0	69.7095	0	74.7715	25.2234	16.6486	Secreted RxLR effector peptide protein
maker-pcu_contig_9227-snap-gene-0.1-mRNA-1	0	120.98	112.91	74.7715	0	34.7336	Conserved gene of unknown function
maker-pcu_contig_4108-snap-gene-0.1-mRNA-1	0	0	0	74.7715	0	18.6073	Conserved gene of unknown function
maker-pcu_contig_196-snap-gene-0.15-mRNA-1	0	46.7186	115.981	74.7283	108.019	103.039	Trehalose-phosphatase
maker-pcu_contig_19-fgenesh-gene-0.2-mRNA-1	0	146.312	0	74.6358	0	103.145	L-ectoine synthase
maker-pcu_contig_1434-fgenesh-gene-0.1-mRNA-1	0	26.497	78.6845	74.6158	51.7728	38.2938	Elongation factor 3
maker-pcu_contig_258-snap-gene-0.8-mRNA-1	0	0	0	74.5906	127.211	107.991	Transmembrane protein 198
maker-pcu_contig_87-snap-gene-0.9-mRNA-1	0	46.03	91.6468	74.5691	78.5179	96.9946	Cullin-associated NEDD8-dissociated protein
maker-pcu_contig_9547-snap-gene-0.1-mRNA-1	0	0	0	74.4864	60.2197	90.6655	Conserved gene of unknown function
maker-pcu_contig_8120-snap-gene-0.1-mRNA-1	0	75.1042	90.3117	74.4783	66.0344	71.8875	RNA 3'-terminal phosphate cyclase
maker-pcu_contig_169-snap-gene-0.15-mRNA-1	0	0	0	74.4591	62.3679	37.1541	Lysophospholipid acyltransferase
maker-pcu_contig_1810-snap-gene-0.5-mRNA-1	0	0	0	74.4331	89.2772	65.6027	C2H2-type zinc finger-containing protein
[truncated: 5,823 more rows]
