# Supplementary material for: mRNA-Seq Analysis of the Pseudoperonospora cubensis Transcriptome During Cucumber (Cucumis sativus L.) Infection
Source: PLoS One. 2012 Apr 24;7(4):e35796. doi: 10.1371/journal.pone.0035796 (PMC3335787; doi:10.1371/journal.pone.0035796)
Supplement: Table S3 — List of 20 highly expressed genes at different time points and control samples. Their FPKM values and putative function as determined by BLASTX searches against UniRef100 (E-value cutoff 1e-5) are shown. (XLSX) [file pone.0035796.s006.xlsx]

## Sheet: Sheet1
Table S3. List of top 20 most highly expressed genes at different time-points and control, their FPKM values and putative function as determined by BLASTX searches against UniRef100 (E-value cutoff 1e-5) and Pfam protein family and domain search.
Time-point	Gene ID	FPKM value	Putative function
1 dpi	maker-pcu_contig_32223-snap-gene-0.0-mRNA-1	270121	Elongation factor 1-alpha
1 dpi	maker-pcu_contig_23302-fgenesh-gene-0.0-mRNA-1	108010	Initiation factor 5a
1 dpi	maker-pcu_contig_9582-snap-gene-0.1-mRNA-1	97836	Elongation factor 1-alpha
1 dpi	maker-pcu_contig_26955-snap-gene-0.1-mRNA-1	63357.4	S-adenosylmethionine synthase
1 dpi	maker-pcu_contig_11064-snap-gene-0.0-mRNA-1	47619.5	Actin
1 dpi	maker-pcu_contig_27815-fgenesh-gene-0.0-mRNA-1	45468.7	HSC70-1 (heat shock cognate 70 kDa protein 1); ATP binding isoform 2
1 dpi	maker-pcu_contig_19713-snap-gene-0.0-mRNA-1	44469.5	Eukaryotic translation initiation factor 5A
1 dpi	maker-pcu_contig_9473-snap-gene-0.0-mRNA-1	42574.8	NAD-specific glutamate dehydrogenase
1 dpi	maker-pcu_contig_21508-snap-gene-0.1-mRNA-1	34848.9	Elongation factor 1-alpha
1 dpi	maker-pcu_contig_35794-snap-gene-0.0-mRNA-1	34345.7	60S ribosomal protein L8-3
1 dpi	maker-pcu_contig_27609-fgenesh-gene-0.0-mRNA-1	31970.7	Elongation factor 1-alpha
1 dpi	maker-pcu_contig_17567-snap-gene-0.0-mRNA-1	21758.4	ADP-ribosylation factor
1 dpi	maker-pcu_contig_19523-snap-gene-0.0-mRNA-1	21629.3	Translationally controlled tumor protein
1 dpi	maker-pcu_contig_8928-snap-gene-0.1-mRNA-1	18625.3	NAD-specific glutamate dehydrogenase
1 dpi	maker-pcu_contig_8512-snap-gene-0.1-mRNA-1	17007.9	Catalase
1 dpi	maker-pcu_contig_4249-snap-gene-0.0-mRNA-1	16204.8	RNA binding motif protein
1 dpi	maker-pcu_contig_12102-snap-gene-0.1-mRNA-1	15548	70 kDa heat shock protein
1 dpi	maker-pcu_contig_398-snap-gene-0.0-mRNA-1	12146.9	NAD(P)H-quinone oxidoreductase subunit 2 A, chloroplastic
1 dpi	maker-pcu_contig_2034-snap-gene-0.0-mRNA-1	11041.5	ATP-dependent Clp protease proteolytic subunit
1 dpi	maker-pcu_contig_34652-snap-gene-0.0-mRNA-1	10857.3	Histone H3
2 dpi	maker-pcu_contig_32223-snap-gene-0.0-mRNA-1	55153.7	Elongation factor 1-alpha
2 dpi	maker-pcu_contig_23302-fgenesh-gene-0.0-mRNA-1	23136.8	Initiation factor 5a
2 dpi	maker-pcu_contig_9582-snap-gene-0.1-mRNA-1	20709.1	Elongation factor 1-alpha
2 dpi	maker-pcu_contig_26955-snap-gene-0.1-mRNA-1	17363.8	S-adenosylmethionine synthase
2 dpi	maker-pcu_contig_35794-snap-gene-0.0-mRNA-1	15410.9	60S ribosomal protein L8-3
2 dpi	maker-pcu_contig_27815-fgenesh-gene-0.0-mRNA-1	13115.9	HSC70-1 (heat shock cognate 70 kDa protein 1); ATP binding isoform 2
2 dpi	maker-pcu_contig_1358-snap-gene-0.1-mRNA-1	11878.1	GK22061
2 dpi	maker-pcu_contig_9473-snap-gene-0.0-mRNA-1	11535.2	NAD-specific glutamate dehydrogenase
2 dpi	maker-pcu_contig_14079-fgenesh-gene-0.0-mRNA-1	10864.7	Elongation factor 1-alpha
2 dpi	maker-pcu_contig_5317-snap-gene-0.1-mRNA-1	9086.87	Carboxyl-ester lipase
2 dpi	maker-pcu_contig_19713-snap-gene-0.0-mRNA-1	8965.39	Eukaryotic translation initiation factor 5A
2 dpi	maker-pcu_contig_31069-snap-gene-0.0-mRNA-1	8858.01	Conserved gene of unknown function
2 dpi	maker-pcu_contig_21508-snap-gene-0.1-mRNA-1	8153.81	Elongation factor 1-alpha
2 dpi	maker-pcu_contig_11064-snap-gene-0.0-mRNA-1	8017.49	Actin
2 dpi	maker-pcu_contig_121-fgenesh-gene-0.0-mRNA-1	7501.64	Ribosomal protein L27
2 dpi	maker-pcu_contig_1119-snap-gene-0.4-mRNA-1	6753.2	Conserved gene of unknown function
2 dpi	maker-pcu_contig_16608-snap-gene-0.1-mRNA-1	6496.23	Conserved gene of unknown function
2 dpi	maker-pcu_contig_35271-snap-gene-0.1-mRNA-1	6209.39	Alpha-tubulin
2 dpi	maker-pcu_contig_21-fgenesh-gene-0.6-mRNA-1	5369.27	60S ribosomal protein L18-2
2 dpi	maker-pcu_contig_661-fgenesh-gene-0.0-mRNA-1	5276.06	Actin
3 dpi	maker-pcu_contig_32223-snap-gene-0.0-mRNA-1	27896.3	Elongation factor 1-alpha
3 dpi	maker-pcu_contig_23302-fgenesh-gene-0.0-mRNA-1	21457.6	Ubiquitin/ribosomal protein
3 dpi	maker-pcu_contig_14079-fgenesh-gene-0.0-mRNA-1	11008.6	Enoyl-CoA hydratase, mitochondrial
3 dpi	maker-pcu_contig_9582-snap-gene-0.1-mRNA-1	10644.2	Adenosylhomocysteinase
3 dpi	maker-pcu_contig_2260-fgenesh-gene-0.0-mRNA-1	8838.21	Eukaryotic translation initiation factor 1A
3 dpi	maker-pcu_contig_957-fgenesh-gene-0.2-mRNA-1	7544.24	ADP/ATP translocase
3 dpi	maker-pcu_contig_19713-snap-gene-0.0-mRNA-1	7493.65	Glucanase inhibitor protein 1
3 dpi	maker-pcu_contig_35794-snap-gene-0.0-mRNA-1	7490.05	3-hydroxyisobutyrate dehydrogenase
3 dpi	maker-pcu_contig_180-snap-gene-0.12-mRNA-1	6663.17	Conserved gene of unknown function
3 dpi	maker-pcu_contig_121-fgenesh-gene-0.0-mRNA-1	6542.96	Ser/thr kinase
3 dpi	maker-pcu_contig_402-fgenesh-gene-0.1-mRNA-1	6538.99	Gene of unknown function
3 dpi	maker-pcu_contig_21-fgenesh-gene-0.6-mRNA-1	6474.38	ADP-ribosylation factor
3 dpi	maker-pcu_contig_8512-snap-gene-0.1-mRNA-1	6224.37	60S ribosomal protein L35
3 dpi	maker-pcu_contig_3878-fgenesh-gene-0.1-mRNA-1	6222.69	Conserved gene of unknown function
3 dpi	maker-pcu_contig_21508-snap-gene-0.1-mRNA-1	6159.63	Amino Acid/Auxin Permease (AAAP) Family
3 dpi	maker-pcu_contig_135-snap-gene-0.15-mRNA-1	5815.18	ATP-binding Cassette (ABC) Superfamily
3 dpi	maker-pcu_contig_27815-fgenesh-gene-0.0-mRNA-1	5670.74	HSC70-1 (heat shock cognate 70 kDa protein 1); ATP binding isoform 2
3 dpi	maker-pcu_contig_11064-snap-gene-0.0-mRNA-1	5233.05	Actin
3 dpi	maker-pcu_contig_19523-snap-gene-0.0-mRNA-1	5217.1	GK22061
3 dpi	maker-pcu_contig_1358-snap-gene-0.1-mRNA-1	5214.84	40S ribosomal protein S12
4 dpi	maker-pcu_contig_32223-snap-gene-0.0-mRNA-1	13691.9	Elongation factor 1-alpha
4 dpi	maker-pcu_contig_14079-fgenesh-gene-0.0-mRNA-1	12778.8	Elongation factor 1-alpha
4 dpi	maker-pcu_contig_5317-snap-gene-0.1-mRNA-1	11253	Carboxyl-ester lipase
4 dpi	maker-pcu_contig_1358-snap-gene-0.1-mRNA-1	9116.87	GK22061
4 dpi	maker-pcu_contig_269-fgenesh-gene-0.0-mRNA-1	7293.59	Proline-rich protein BstNI subfamily 3 precursor
4 dpi	maker-pcu_contig_7163-snap-gene-0.1-mRNA-1	4719.54	NAD-specific glutamate dehydrogenase
4 dpi	maker-pcu_contig_3878-fgenesh-gene-0.1-mRNA-1	4679.1	60S ribosomal protein L37a
4 dpi	maker-pcu_contig_21-fgenesh-gene-0.6-mRNA-1	4640.63	60S ribosomal protein L18-2
4 dpi	maker-pcu_contig_637-fgenesh-gene-0.1-mRNA-1	4589.98	Heat shock protein 90
4 dpi	maker-pcu_contig_180-snap-gene-0.12-mRNA-1	4517.11	40S ribosomal protein S3a
4 dpi	maker-pcu_contig_661-fgenesh-gene-0.0-mRNA-1	4506.05	Actin
4 dpi	maker-pcu_contig_957-fgenesh-gene-0.2-mRNA-1	4498.55	60S ribosomal protein L10a-1
4 dpi	maker-pcu_contig_450-snap-gene-0.11-mRNA-1	4338.03	Fructokinase
4 dpi	maker-pcu_contig_2260-fgenesh-gene-0.0-mRNA-1	4317.32	60S ribosomal protein L44
4 dpi	maker-pcu_contig_402-fgenesh-gene-0.1-mRNA-1	4259.5	40S ribosomal protein S2
4 dpi	maker-pcu_contig_1404-fgenesh-gene-0.0-mRNA-1	4163.95	Conserved gene of unknown function
4 dpi	maker-pcu_contig_23302-fgenesh-gene-0.0-mRNA-1	4092.96	Initiation factor 5a
4 dpi	maker-pcu_contig_6605-snap-gene-0.0-mRNA-1	3946.18	Glucanase inhibitor protein 1
4 dpi	maker-pcu_contig_18025-snap-gene-0.0-mRNA-1	3916.99	Glucanase inhibitor protein 1
4 dpi	maker-pcu_contig_373-fgenesh-gene-0.3-mRNA-1	3871.36	RS26, ribosomal protein 26 40S small ribosomal subunit
6 dpi	maker-pcu_contig_32223-snap-gene-0.0-mRNA-1	24271.2	Elongation factor 1-alpha
6 dpi	maker-pcu_contig_9582-snap-gene-0.1-mRNA-1	8861.74	Elongation factor 1-alpha
6 dpi	maker-pcu_contig_23302-fgenesh-gene-0.0-mRNA-1	8074.52	Initiation factor 5a
6 dpi	maker-pcu_contig_14079-fgenesh-gene-0.0-mRNA-1	7775.8	Elongation factor 1-alpha
6 dpi	maker-pcu_contig_5317-snap-gene-0.1-mRNA-1	6573.75	Carboxyl-ester lipase
6 dpi	maker-pcu_contig_637-fgenesh-gene-0.1-mRNA-1	6336.63	Ribosomal protein
6 dpi	maker-pcu_contig_1358-snap-gene-0.1-mRNA-1	5519.33	Glucanase inhibitor protein 1
6 dpi	maker-pcu_contig_27609-fgenesh-gene-0.0-mRNA-1	5284.6	Ubiquitin carrier protein
6 dpi	maker-pcu_contig_402-fgenesh-gene-0.1-mRNA-1	4631.54	Glutamine synthetase
6 dpi	maker-pcu_contig_21-fgenesh-gene-0.6-mRNA-1	4537.46	Glutathione S-transferase
6 dpi	maker-pcu_contig_9473-snap-gene-0.0-mRNA-1	4425.22	Inositol-3-phosphate synthase
6 dpi	maker-pcu_contig_2260-fgenesh-gene-0.0-mRNA-1	4182.51	Ubiquitin carrier protein
6 dpi	maker-pcu_contig_3878-fgenesh-gene-0.1-mRNA-1	4046.75	Elicitin SOL11B
6 dpi	maker-pcu_contig_957-fgenesh-gene-0.2-mRNA-1	4015.43	Conserved gene of unknown function
6 dpi	maker-pcu_contig_661-fgenesh-gene-0.0-mRNA-1	3973.84	Sugar transporter
6 dpi	maker-pcu_contig_269-fgenesh-gene-0.0-mRNA-1	3680.55	ADP, ATP carrier protein
6 dpi	maker-pcu_contig_180-snap-gene-0.12-mRNA-1	3552.14	40S ribosomal protein S4
6 dpi	maker-pcu_contig_7163-snap-gene-0.1-mRNA-1	3507.2	NAD-specific glutamate dehydrogenase
6 dpi	maker-pcu_contig_19713-snap-gene-0.0-mRNA-1	3500.73	Eukaryotic translation initiation factor 5A
6 dpi	maker-pcu_contig_7-fgenesh-gene-0.15-mRNA-1	3487.01	60S ribosomal protein L7
8 dpi	maker-pcu_contig_14079-fgenesh-gene-0.0-mRNA-1	8528.21	Elongation factor 1-alpha
8 dpi	maker-pcu_contig_5317-snap-gene-0.1-mRNA-1	5988.43	Carboxyl-ester lipase
8 dpi	maker-pcu_contig_3878-fgenesh-gene-0.1-mRNA-1	5100.62	60S ribosomal protein L37a
8 dpi	maker-pcu_contig_1358-snap-gene-0.1-mRNA-1	4853.54	GK22061
8 dpi	maker-pcu_contig_7163-snap-gene-0.1-mRNA-1	4773.95	NAD-specific glutamate dehydrogenase
8 dpi	maker-pcu_contig_21-fgenesh-gene-0.6-mRNA-1	4520.24	60S ribosomal protein L18-2
8 dpi	maker-pcu_contig_661-fgenesh-gene-0.0-mRNA-1	4480.83	Actin
8 dpi	maker-pcu_contig_180-snap-gene-0.12-mRNA-1	3974.66	40S ribosomal protein S3a
8 dpi	maker-pcu_contig_7269-fgenesh-gene-0.0-mRNA-1	3913.35	Tyrosyl-tRNA synthetase, cytoplasmic
8 dpi	maker-pcu_contig_1221-fgenesh-gene-0.3-mRNA-1	3895.51	60S ribosomal protein L10
8 dpi	maker-pcu_contig_957-fgenesh-gene-0.2-mRNA-1	3787.8	60S ribosomal protein L10a-1
8 dpi	maker-pcu_contig_402-fgenesh-gene-0.1-mRNA-1	3716.14	40S ribosomal protein S2
8 dpi	maker-pcu_contig_989-fgenesh-gene-0.3-mRNA-1	3646.85	Calmodulin
8 dpi	maker-pcu_contig_3167-fgenesh-gene-0.0-mRNA-1	3588.54	Small cysteine rich protein SCR108
8 dpi	maker-pcu_contig_637-fgenesh-gene-0.1-mRNA-1	3550.25	Heat shock protein 90
8 dpi	maker-pcu_contig_1067-snap-gene-0.5-mRNA-1	3457.91	Cyclophilin A
8 dpi	maker-pcu_contig_10401-snap-gene-0.1-mRNA-1	3427.94	Annexin (Annexin) Family
8 dpi	maker-pcu_contig_1119-snap-gene-0.4-mRNA-1	3368.26	Conserved gene of unknown function
8 dpi	maker-pcu_contig_7-fgenesh-gene-0.15-mRNA-1	3363.74	60S ribosomal protein L7
8 dpi	maker-pcu_contig_2260-fgenesh-gene-0.0-mRNA-1	3285.57	60S ribosomal protein L44
Sporangia	maker-pcu_contig_21508-snap-gene-0.1-mRNA-1	73873	Elongation factor 1-alpha
Sporangia	maker-pcu_contig_35794-snap-gene-0.0-mRNA-1	18240	60S ribosomal protein L8-3
Sporangia	maker-pcu_contig_31230-snap-gene-0.1-mRNA-1	1981.8	Elongation factor 1-alpha
Sporangia	maker-pcu_contig_12102-snap-gene-0.1-mRNA-1	9767	70 kDa heat shock protein
Sporangia	maker-pcu_contig_12686-fgenesh-gene-0.0-mRNA-1	5492.67	Adenosylhomocysteinase
Sporangia	maker-pcu_contig_11064-snap-gene-0.0-mRNA-1	4263.8	Actin
Sporangia	maker-pcu_contig_398-snap-gene-0.1-mRNA-1	4128.44	NADH dehydrogenase subunit B
Sporangia	maker-pcu_contig_398-snap-gene-0.0-mRNA-1	3899.27	NAD(P)H-quinone oxidoreductase subunit 2 A, chloroplastic
Sporangia	maker-pcu_contig_3404-snap-gene-0.0-mRNA-1	2027.23	ATP synthase subunit beta, chloroplastic
Sporangia	maker-pcu_contig_8513-snap-gene-0.0-mRNA-1	2006.08	Vacuolar proton-inorganic pyrophosphatase
Sporangia	maker-pcu_contig_2865-snap-gene-0.2-mRNA-1	1988.64	Lipoprotein releasing system, ATP-binding protein
Sporangia	maker-pcu_contig_8936-fgenesh-gene-0.0-mRNA-1	1645	AMP-dependent synthetase and ligase
Sporangia	maker-pcu_contig_1322-snap-gene-0.0-mRNA-1	1427.54	ATP-binding protein of ABC transporter
Sporangia	maker-pcu_contig_1504-fgenesh-gene-0.2-mRNA-1	1418.29	ABC transporter, ATP-binding protein
Sporangia	maker-pcu_contig_2482-fgenesh-gene-0.0-mRNA-1	1372.04	Outer membrane adhesin
Sporangia	maker-pcu_contig_3998-snap-gene-0.2-mRNA-1	1333.2	Cyanophycin synthetase
Sporangia	maker-pcu_contig_4589-fgenesh-gene-0.1-mRNA-1	1332.39	Hypothetical conserved protein
Sporangia	maker-pcu_contig_6895-snap-gene-0.1-mRNA-1	1201.39	Transporter, hydrophobe/amphiphile efflux-1 (HAE1) family
Sporangia	maker-pcu_contig_3408-snap-gene-0.2-mRNA-1	1179.78	TonB-dependent receptor
Sporangia	maker-pcu_contig_9887-fgenesh-gene-0.0-mRNA-1	1153.87	AMP nucleosidase
