# Supplementary material for: mRNA-Seq Analysis of the Pseudoperonospora cubensis Transcriptome During Cucumber (Cucumis sativus L.) Infection
Source: PLoS One. 2012 Apr 24;7(4):e35796. doi: 10.1371/journal.pone.0035796 (PMC3335787; doi:10.1371/journal.pone.0035796)
Supplement: Table S4 — List of genes expressed in sporangia. Shown are the gene ID, FPKM values along with their functional annotation. (XLSX) [file pone.0035796.s007.xlsx]

## Sheet: Sheet1
Table S4. List of genes expressed in sporangia. Shown are the gene ID, FPKM values along with their functional annotation.
Gene ID	FPKM	Functional annotation
maker-pcu_contig_1-fgenesh-gene-0.18-mRNA-1	278.556	C2 domain-containing protein
maker-pcu_contig_1-fgenesh-gene-0.5-mRNA-1	1945.49	Histone H1
maker-pcu_contig_1-snap-gene-0.27-mRNA-1	33.7989	Protein kinase
maker-pcu_contig_1-snap-gene-0.28-mRNA-1	5.47487	Gene of unknown function
maker-pcu_contig_1-snap-gene-0.29-mRNA-1	93.2764	C2 domain-containing protein
maker-pcu_contig_1-snap-gene-0.33-mRNA-1	56.8653	Isovaleryl-CoA dehydrogenase
maker-pcu_contig_1-snap-gene-0.34-mRNA-1	74.9381	Bromodomain containing protein
maker-pcu_contig_1-snap-gene-0.35-mRNA-1	83.3742	Znf622 protein
maker-pcu_contig_1-snap-gene-0.36-mRNA-1	611.772	Calcium-binding protein
maker-pcu_contig_1-snap-gene-0.37-mRNA-1	107.891	Conserved gene of unknown function
maker-pcu_contig_1-snap-gene-0.41-mRNA-1	20.296	Binding protein
maker-pcu_contig_1-snap-gene-0.42-mRNA-1	7.6413	F-box protein
maker-pcu_contig_1-snap-gene-0.44-mRNA-1	256.679	Conserved gene of unknown function
maker-pcu_contig_1-snap-gene-0.47-mRNA-1	12.6958	Conserved gene of unknown function
maker-pcu_contig_1-snap-gene-0.48-mRNA-1	28.6056	ER degradation-enhancing alpha-mannosidase
maker-pcu_contig_1-snap-gene-0.51-mRNA-1	36.8346	Aspartate aminotransferase
maker-pcu_contig_1-snap-gene-0.52-mRNA-1	7.95042	MBO2, coiled coil flagellar protein
maker-pcu_contig_1-snap-gene-0.53-mRNA-1	29.967	D-2-hydroxyglutarate dehydrogenase, mitochondrial
maker-pcu_contig_1-snap-gene-0.54-mRNA-1	13.473	ATP-dependent hsl protease ATP-binding subunit hslU
maker-pcu_contig_1-snap-gene-0.55-mRNA-1	373.374	Conserved gene of unknown function
maker-pcu_contig_1-snap-gene-0.56-mRNA-1	22.5843	Protein SYS1
maker-pcu_contig_1-snap-gene-0.58-mRNA-1	1525.79	Conserved gene of unknown function
maker-pcu_contig_1-snap-gene-0.59-mRNA-1	11.2951	KIAA1632
maker-pcu_contig_1-snap-gene-1.0-mRNA-1	57.9808	Cell division cycle protein 14
maker-pcu_contig_1-snap-gene-1.1-mRNA-1	99.9282	Thymidylate kinase
maker-pcu_contig_10-fgenesh-gene-0.11-mRNA-1	8.79718	U1 zinc finger protein
maker-pcu_contig_10-fgenesh-gene-0.6-mRNA-1	548.1	Gene of unknown function
maker-pcu_contig_10-snap-gene-0.16-mRNA-1	17.8554	C. briggsae CBR-KLP-6 protein
maker-pcu_contig_10-snap-gene-0.17-mRNA-1	212.332	Phosphatidylinositol-3,4,5-trisphosphate 5-phosphatase
maker-pcu_contig_10-snap-gene-0.18-mRNA-1	187.953	Myosin
maker-pcu_contig_10-snap-gene-0.19-mRNA-1	98.6808	Cyclin-dependent protein kinase
maker-pcu_contig_10-snap-gene-0.20-mRNA-1	304.323	Casein kinase
maker-pcu_contig_10-snap-gene-0.21-mRNA-1	16.1541	CLIP-associating protein
maker-pcu_contig_10-snap-gene-0.22-mRNA-1	109.7	KLLA0D18348p
maker-pcu_contig_10-snap-gene-0.23-mRNA-1	6.56878	Kinesin
maker-pcu_contig_10-snap-gene-0.24-mRNA-1	67.1907	Mucin
maker-pcu_contig_10-snap-gene-0.25-mRNA-1	1531.08	Phosphoglycerate mutase
maker-pcu_contig_10-snap-gene-0.26-mRNA-1	40.0396	Conserved gene of unknown function
maker-pcu_contig_10-snap-gene-0.27-mRNA-1	20.6837	Mitochondrial Carrier (MC) Family
maker-pcu_contig_10-snap-gene-0.28-mRNA-1	28.6479	Acetyl-coenzyme A synthetase
maker-pcu_contig_10-snap-gene-0.29-mRNA-1	55.1027	CGMP-dependent protein kinase 1, beta isozyme, partial
maker-pcu_contig_10-snap-gene-0.30-mRNA-1	50.582	Gene of unknown function
maker-pcu_contig_10-snap-gene-0.31-mRNA-1	115.018	CG5645-PA
maker-pcu_contig_10-snap-gene-0.33-mRNA-1	78.8034	Conserved gene of unknown function
maker-pcu_contig_10-snap-gene-0.37-mRNA-1	34.9796	Imidazole glycerol phosphate synthase hisHF
maker-pcu_contig_10-snap-gene-0.39-mRNA-1	10.9813	WD domain-containing protein
maker-pcu_contig_100-fgenesh-gene-0.0-mRNA-1	1169.64	40S ribosomal protein S14
maker-pcu_contig_100-snap-gene-0.10-mRNA-1	4.7264	Chromosome 7 open reading frame 62
maker-pcu_contig_100-snap-gene-0.14-mRNA-1	166.241	Conserved gene of unknown function
maker-pcu_contig_100-snap-gene-0.16-mRNA-1	8.41544	Kazal-type serine protease inhibitor
maker-pcu_contig_100-snap-gene-0.17-mRNA-1	24.7046	ATP-binding Cassette (ABC) Superfamily
maker-pcu_contig_100-snap-gene-0.18-mRNA-1	26.8379	Conserved gene of unknown function
maker-pcu_contig_100-snap-gene-0.19-mRNA-1	30.4178	HECT E3 ubiquitin ligase
maker-pcu_contig_1000-snap-gene-0.2-mRNA-1	9.51482	HEAT repeat containing 1
maker-pcu_contig_1000-snap-gene-0.3-mRNA-1	281.878	Hydroxymethylglutaryl-CoA lyase, mitochondrial
maker-pcu_contig_10012-snap-gene-0.1-mRNA-1	4.98336	Phosphatidylinositol kinase (PIK-F)
maker-pcu_contig_10015-snap-gene-0.0-mRNA-1	10.5121	Avh163
maker-pcu_contig_1002-fgenesh-gene-0.0-mRNA-1	5.05837	Major Facilitator Superfamily (MFS)
maker-pcu_contig_1002-snap-gene-0.4-mRNA-1	18.476	Protection of telomeres 1 protein
maker-pcu_contig_1002-snap-gene-0.6-mRNA-1	4.10661	Autophagy protein Apg9 containing protein
maker-pcu_contig_10021-fgenesh-gene-0.0-mRNA-1	78.0851	Peroxisomal 2,4-dienoyl-CoA reductase
maker-pcu_contig_1003-fgenesh-gene-0.0-mRNA-1	45.3869	Kinesin
maker-pcu_contig_10031-snap-gene-0.0-mRNA-1	8.44574	Conserved gene of unknown function
maker-pcu_contig_1005-fgenesh-gene-0.0-mRNA-1	564.185	Cellulose binding elicitor lectin (CBEL)
maker-pcu_contig_1005-fgenesh-gene-0.1-mRNA-1	14.4564	Conserved gene of unknown function
maker-pcu_contig_1005-snap-gene-0.5-mRNA-1	2141.9	Rab8 family GTPase
maker-pcu_contig_1005-snap-gene-0.6-mRNA-1	57.2204	3-phosphoinositide-dependent protein kinase
maker-pcu_contig_1005-snap-gene-0.7-mRNA-1	177.592	Conserved gene of unknown function
maker-pcu_contig_1006-fgenesh-gene-0.0-mRNA-1	139.255	Conserved gene of unknown function
maker-pcu_contig_1006-snap-gene-0.4-mRNA-1	4.21983	DNA-directed RNA polymerase
maker-pcu_contig_1007-snap-gene-0.1-mRNA-1	29.4731	Conserved gene of unknown function
maker-pcu_contig_1007-snap-gene-0.2-mRNA-1	5.48982	Conserved gene of unknown function
maker-pcu_contig_1007-snap-gene-0.3-mRNA-1	7.1948	Acyltransferase family
maker-pcu_contig_1007-snap-gene-0.4-mRNA-1	30.6944	CG7484
maker-pcu_contig_1008-snap-gene-0.2-mRNA-1	233.168	Transcription factor IWS1
maker-pcu_contig_1008-snap-gene-0.5-mRNA-1	78.02	Lipase
maker-pcu_contig_10080-snap-gene-0.0-mRNA-1	25.5128	Major Facilitator Superfamily (MFS)
maker-pcu_contig_10084-snap-gene-0.1-mRNA-1	93.642	DNA polymerase beta
maker-pcu_contig_10087-snap-gene-0.0-mRNA-1	18.6993	Conserved gene of unknown function
maker-pcu_contig_1009-snap-gene-0.3-mRNA-1	67.8441	Annexin (Annexin) Family
maker-pcu_contig_1009-snap-gene-0.4-mRNA-1	12.8207	Protein F40E10.6, confirmed by transcript evidence
maker-pcu_contig_1009-snap-gene-0.5-mRNA-1	5.67697	Mitogen-activated protein kinase kinase kinase
maker-pcu_contig_1009-snap-gene-0.6-mRNA-1	12.4256	Conserved gene of unknown function
maker-pcu_contig_101-fgenesh-gene-0.0-mRNA-1	43.0228	Mitochondrial-processing peptidase subunit beta
maker-pcu_contig_101-snap-gene-0.10-mRNA-1	95.082	Mahogunin
maker-pcu_contig_101-snap-gene-0.11-mRNA-1	4.84371	Adenine phosphoribosyltransferase
maker-pcu_contig_101-snap-gene-0.12-mRNA-1	7.49777	PAX-interacting protein 1
maker-pcu_contig_101-snap-gene-0.13-mRNA-1	16.5127	Cytoskeletal protein Sojo
maker-pcu_contig_101-snap-gene-0.16-mRNA-1	1280.43	Protein kinase
maker-pcu_contig_101-snap-gene-0.17-mRNA-1	7.1532	Major Facilitator Superfamily (MFS)
maker-pcu_contig_101-snap-gene-0.18-mRNA-1	9.0051	Chromosome 14 open reading frame 102
maker-pcu_contig_101-snap-gene-0.20-mRNA-1	6.89061	Conserved gene of unknown function
maker-pcu_contig_101-snap-gene-0.7-mRNA-1	69.3917	Conserved gene of unknown function
maker-pcu_contig_101-snap-gene-0.9-mRNA-1	9.03768	Kinesin heavy chain
maker-pcu_contig_1010-snap-gene-0.1-mRNA-1	37.7226	Vacuolar protein sorting-associated protein VPS9
maker-pcu_contig_1010-snap-gene-0.2-mRNA-1	13.4874	Conserved gene of unknown function
maker-pcu_contig_1010-snap-gene-0.3-mRNA-1	337.509	SCP-like extracellular protein
maker-pcu_contig_1010-snap-gene-0.4-mRNA-1	498.311	Gene of unknown function
maker-pcu_contig_1010-snap-gene-0.5-mRNA-1	266.797	Hepatocyte growth factor regulated tyrosine kinase substrate CG2903-PC, partial
maker-pcu_contig_1011-fgenesh-gene-0.1-mRNA-1	126.049	Protein kinase
maker-pcu_contig_10117-snap-gene-0.1-mRNA-1	97.285	Conserved gene of unknown function
maker-pcu_contig_10128-snap-gene-0.0-mRNA-1	23.9435	Titin isoform N2-B
maker-pcu_contig_10129-snap-gene-0.1-mRNA-1	46.4456	RMD5 family protein
maker-pcu_contig_10137-snap-gene-0.0-mRNA-1	9.90785	WD repeat containing, antisense to TP53
maker-pcu_contig_1014-snap-gene-0.2-mRNA-1	17.1239	CG3436
maker-pcu_contig_1014-snap-gene-0.3-mRNA-1	43.0323	Mitochondrial Carrier (MC) Family
maker-pcu_contig_1014-snap-gene-0.4-mRNA-1	47.6516	Secreted RxLR effector peptide protein
maker-pcu_contig_1014-snap-gene-0.5-mRNA-1	28.7669	Inhibitor of growth protein
maker-pcu_contig_1016-snap-gene-0.2-mRNA-1	32.6548	Importin-alpha1
maker-pcu_contig_1016-snap-gene-0.3-mRNA-1	9.5249	Vacuolar protein sorting-associated protein
maker-pcu_contig_1016-snap-gene-0.4-mRNA-1	19.9281	Peptidylprolyl isomerase
maker-pcu_contig_1016-snap-gene-0.5-mRNA-1	14.4975	GlcNac transferase
maker-pcu_contig_1016-snap-gene-0.6-mRNA-1	22.6816	Gene of unknown function
maker-pcu_contig_1016-snap-gene-0.7-mRNA-1	77.012	Vacuolar protein sorting-associated protein
maker-pcu_contig_10168-snap-gene-0.0-mRNA-1	54.1317	Nucleolar protein
maker-pcu_contig_1017-snap-gene-0.1-mRNA-1	29.8299	Kinesin
maker-pcu_contig_1017-snap-gene-0.2-mRNA-1	14.5162	Conserved gene of unknown function
maker-pcu_contig_1017-snap-gene-0.3-mRNA-1	21.3832	Serine/threonine protein kinase
maker-pcu_contig_1018-fgenesh-gene-0.0-mRNA-1	1832.97	Elicitin RAL13E
maker-pcu_contig_1018-snap-gene-0.1-mRNA-1	106.885	ATP-binding Cassette (ABC) Superfamily
maker-pcu_contig_10181-snap-gene-0.1-mRNA-1	10.7098	Long-chain-fatty-acid-CoA ligase
maker-pcu_contig_1019-snap-gene-0.2-mRNA-1	33.7554	Conserved gene of unknown function
maker-pcu_contig_102-fgenesh-gene-0.0-mRNA-1	26.0685	Conserved gene of unknown function
maker-pcu_contig_102-fgenesh-gene-0.4-mRNA-1	74.3659	FKBP-type peptidyl-prolyl cis-trans isomerase
maker-pcu_contig_102-fgenesh-gene-0.6-mRNA-1	8.85136	Proteasome subunit beta type-6
maker-pcu_contig_102-snap-gene-0.10-mRNA-1	8.99329	AAA family ATPase
maker-pcu_contig_102-snap-gene-0.11-mRNA-1	238.258	Eukaryotic translation initiation factor eIF-1A subunit
maker-pcu_contig_102-snap-gene-0.12-mRNA-1	297.48	Conserved gene of unknown function
maker-pcu_contig_102-snap-gene-0.13-mRNA-1	8.47803	Ribosome biogenesis ATPase RIX7
maker-pcu_contig_102-snap-gene-0.14-mRNA-1	259.512	Conserved gene of unknown function
maker-pcu_contig_102-snap-gene-0.17-mRNA-1	317.932	Conserved gene of unknown function
maker-pcu_contig_102-snap-gene-0.20-mRNA-1	32.4023	TPR Domain containing protein
maker-pcu_contig_1020-fgenesh-gene-0.1-mRNA-1	149.928	Nuclear autoantigenic sperm protein
maker-pcu_contig_1020-snap-gene-0.4-mRNA-1	402.703	R-SNARE protein, VAMP72-family
maker-pcu_contig_1020-snap-gene-0.6-mRNA-1	4.74752	Nuclear cap-binding protein subunit
maker-pcu_contig_1023-snap-gene-0.0-mRNA-1	22.5252	Conserved gene of unknown function
maker-pcu_contig_1023-snap-gene-0.1-mRNA-1	4.66683	Kinesin K39
maker-pcu_contig_10242-snap-gene-0.0-mRNA-1	106.161	Ubiquitin fusion degradaton protein
maker-pcu_contig_1025-snap-gene-0.1-mRNA-1	209.8	Inositol-3,4-bisphosphate 4-phosphatase
maker-pcu_contig_1025-snap-gene-0.2-mRNA-1	95.5815	Neurofilament triplet L protein
maker-pcu_contig_10268-snap-gene-0.0-mRNA-1	26.5366	Transmembrane protein
maker-pcu_contig_1027-snap-gene-0.3-mRNA-1	15.1716	5-formyltetrahydrofolate cyclo-ligase
maker-pcu_contig_1027-snap-gene-0.5-mRNA-1	13.1526	GH12928
maker-pcu_contig_1027-snap-gene-0.6-mRNA-1	184.541	Pc20g08430 protein
maker-pcu_contig_1029-snap-gene-0.3-mRNA-1	51.2057	Erythrocyte binding protein
maker-pcu_contig_1029-snap-gene-0.5-mRNA-1	6.82455	Conserved gene of unknown function
maker-pcu_contig_1029-snap-gene-0.6-mRNA-1	17.6122	Conserved gene of unknown function
maker-pcu_contig_1029-snap-gene-0.7-mRNA-1	19.3564	ATPase
maker-pcu_contig_10292-snap-gene-0.1-mRNA-1	12.4553	Berberine
maker-pcu_contig_103-fgenesh-gene-0.0-mRNA-1	6.01976	Gene of unknown function
maker-pcu_contig_103-fgenesh-gene-0.10-mRNA-1	11.7014	Heat shock protein 90
maker-pcu_contig_103-fgenesh-gene-0.9-mRNA-1	604.678	Non-selective Cation Channel-2 (NSCC2) Family
maker-pcu_contig_103-snap-gene-0.12-mRNA-1	40.0431	Conserved gene of unknown function
maker-pcu_contig_103-snap-gene-0.13-mRNA-1	8.68381	Polycomb protein
maker-pcu_contig_103-snap-gene-0.14-mRNA-1	13.7069	Polycomb protein
maker-pcu_contig_103-snap-gene-0.16-mRNA-1	13.2212	Transmembrane protein
maker-pcu_contig_103-snap-gene-0.17-mRNA-1	23.889	Calcineurin-like phosphoesterase
maker-pcu_contig_103-snap-gene-0.19-mRNA-1	20.5088	Flagellar associated protein
maker-pcu_contig_103-snap-gene-0.20-mRNA-1	5.25443	Mitochondrial Carrier (MC) Family
maker-pcu_contig_103-snap-gene-0.21-mRNA-1	34.2689	Conserved gene of unknown function
maker-pcu_contig_103-snap-gene-0.22-mRNA-1	70.313	AT30947p
maker-pcu_contig_103-snap-gene-0.23-mRNA-1	13.6004	Conserved gene of unknown function
maker-pcu_contig_103-snap-gene-0.24-mRNA-1	31.0475	Cyclin-C
maker-pcu_contig_1030-snap-gene-0.1-mRNA-1	1965.96	Conserved gene of unknown function
maker-pcu_contig_1030-snap-gene-0.2-mRNA-1	35.4817	Glucosylceramidase
maker-pcu_contig_1030-snap-gene-0.3-mRNA-1	5.82019	Gene of unknown function
maker-pcu_contig_10310-snap-gene-0.1-mRNA-1	102.01	Dnajb4-prov protein
maker-pcu_contig_10314-snap-gene-0.1-mRNA-1	89.9789	Conserved gene of unknown function
maker-pcu_contig_1033-snap-gene-0.2-mRNA-1	13.4914	Vertebrate dual specificity phosphatase 18 (DUSP18)
maker-pcu_contig_10335-snap-gene-0.0-mRNA-1	290.256	Gene of unknown function
maker-pcu_contig_10336-snap-gene-0.1-mRNA-1	6.32975	Conserved gene of unknown function
maker-pcu_contig_10348-snap-gene-0.0-mRNA-1	68.151	WW domain containing protein
maker-pcu_contig_1036-snap-gene-0.3-mRNA-1	13.1422	AP-4 complex subunit epsilon
maker-pcu_contig_1036-snap-gene-0.4-mRNA-1	11.5415	Conserved gene of unknown function
maker-pcu_contig_1036-snap-gene-0.5-mRNA-1	8.10057	Gene of unknown function
maker-pcu_contig_1036-snap-gene-0.6-mRNA-1	35.8065	Endo-beta-1,6-galactanase
maker-pcu_contig_1036-snap-gene-0.7-mRNA-1	12.2527	WD repeat-containing protein 82
maker-pcu_contig_10363-snap-gene-0.1-mRNA-1	304.346	Callose synthase
maker-pcu_contig_1037-snap-gene-0.2-mRNA-1	22.2845	Transmembrane and coiled-coil domains 4
maker-pcu_contig_1037-snap-gene-0.3-mRNA-1	68.5459	Conserved gene of unknown function
maker-pcu_contig_1037-snap-gene-0.4-mRNA-1	13.0179	Conserved gene of unknown function
maker-pcu_contig_1037-snap-gene-0.5-mRNA-1	78.6555	Conserved gene of unknown function
maker-pcu_contig_10370-fgenesh-gene-0.0-mRNA-1	46.1561	S-adenosylmethionine decarboxylase proenzyme
maker-pcu_contig_1038-snap-gene-0.5-mRNA-1	122.931	Homology to unknown gene
maker-pcu_contig_1038-snap-gene-0.6-mRNA-1	435.971	Conserved gene of unknown function
maker-pcu_contig_1038-snap-gene-0.7-mRNA-1	4678.17	Coiled-coil domain-containing protein MGC104706
maker-pcu_contig_1038-snap-gene-0.8-mRNA-1	766.234	Conserved gene of unknown function
maker-pcu_contig_10385-snap-gene-0.0-mRNA-1	10.8043	Secreted RxLR effector peptide protein
maker-pcu_contig_10398-snap-gene-0.0-mRNA-1	12.624	Conserved gene of unknown function
maker-pcu_contig_104-snap-gene-0.10-mRNA-1	27.8369	Potassium/sodium hyperpolarization-activated cyclic nucleotide-gated channel
maker-pcu_contig_104-snap-gene-0.11-mRNA-1	12.9321	Eukaryotic translation initiation factor 3 subunit G
maker-pcu_contig_104-snap-gene-0.12-mRNA-1	43.5004	RING finger protein 11
maker-pcu_contig_104-snap-gene-0.13-mRNA-1	53.8467	Dolichol kinase
maker-pcu_contig_104-snap-gene-0.14-mRNA-1	91.9636	Conserved gene of unknown function
maker-pcu_contig_104-snap-gene-0.15-mRNA-1	175.847	Liver stage antigen
maker-pcu_contig_104-snap-gene-0.16-mRNA-1	26.2746	Anaphase-promoting complex subunit 4
maker-pcu_contig_104-snap-gene-0.17-mRNA-1	9.30182	Protein D2045.8, confirmed by transcript evidence
maker-pcu_contig_104-snap-gene-0.18-mRNA-1	25.6474	Conserved gene of unknown function
maker-pcu_contig_104-snap-gene-0.19-mRNA-1	34.0842	Programmed cell death protein 2
maker-pcu_contig_104-snap-gene-0.21-mRNA-1	24.0087	Voltage-gated Ion Channel (VIC) Superfamily
maker-pcu_contig_104-snap-gene-0.9-mRNA-1	47.455	Signal recognition particle
maker-pcu_contig_1040-snap-gene-0.3-mRNA-1	52.5039	Conserved gene of unknown function
maker-pcu_contig_10401-snap-gene-0.1-mRNA-1	11.635	Annexin (Annexin) Family
maker-pcu_contig_10409-snap-gene-0.0-mRNA-1	26.2432	Deoxyribonuclease
maker-pcu_contig_1042-fgenesh-gene-0.1-mRNA-1	174.227	Mitochondrial Protein Translocase (MPT) Family
maker-pcu_contig_1042-snap-gene-0.3-mRNA-1	709.385	Cystatin-like cysteine protease inhibitor EPIC4
maker-pcu_contig_1042-snap-gene-0.5-mRNA-1	21.8838	Protein phosphatases pp1 regulatory subunit
maker-pcu_contig_10425-snap-gene-0.0-mRNA-1	4883.57	Gene of unknown function
maker-pcu_contig_1043-fgenesh-gene-0.0-mRNA-1	42.665	Myb-like DNA-binding protein
maker-pcu_contig_1044-fgenesh-gene-0.1-mRNA-1	20.4841	26S proteasome non-ATPase regulatory subunit 12
maker-pcu_contig_1044-fgenesh-gene-0.2-mRNA-1	6.56923	Methylosome subunit pICln
maker-pcu_contig_10445-snap-gene-0.1-mRNA-1	6.4185	TRNA(Ile)-lysidine synthase
maker-pcu_contig_10447-snap-gene-0.0-mRNA-1	26.1015	Conserved gene of unknown function
maker-pcu_contig_1045-snap-gene-0.1-mRNA-1	93.6808	Glutathione S-trasferase
maker-pcu_contig_1046-snap-gene-0.3-mRNA-1	124.804	Peptidyl-prolyl cis-trans isomerase 1
maker-pcu_contig_1046-snap-gene-0.5-mRNA-1	7.4216	Ubiquinone biosynthesis protein
maker-pcu_contig_1046-snap-gene-0.6-mRNA-1	506.186	Myosin
maker-pcu_contig_10464-snap-gene-0.0-mRNA-1	136.902	Acyltransferase family
maker-pcu_contig_10466-snap-gene-0.1-mRNA-1	31.6793	GH14556
maker-pcu_contig_10474-snap-gene-0.0-mRNA-1	20.3819	Conserved gene of unknown function
maker-pcu_contig_10484-snap-gene-0.0-mRNA-1	262.148	Ring finger protein 123
maker-pcu_contig_1049-fgenesh-gene-0.3-mRNA-1	8.17789	Nucleotide-binding protein 1
maker-pcu_contig_1049-snap-gene-0.5-mRNA-1	4.0432	Protein phosphatase 1E
maker-pcu_contig_10491-snap-gene-0.0-mRNA-1	10.6354	GF14769
maker-pcu_contig_10496-snap-gene-0.1-mRNA-1	608.079	Diacylglycerol O-acyltransferase
maker-pcu_contig_10496-snap-gene-0.2-mRNA-1	477.229	Gene of unknown function
maker-pcu_contig_105-fgenesh-gene-0.0-mRNA-1	52.9445	ATP synthase subunit delta'
maker-pcu_contig_105-fgenesh-gene-0.2-mRNA-1	18.9571	Methionyl-tRNA synthetase
maker-pcu_contig_105-fgenesh-gene-0.5-mRNA-1	49.874	Peroxisomal (S)-2-hydroxy-acid oxidase
maker-pcu_contig_105-fgenesh-gene-0.8-mRNA-1	39.6366	Myosin
maker-pcu_contig_105-snap-gene-0.16-mRNA-1	229.684	Protein kinase
maker-pcu_contig_105-snap-gene-0.17-mRNA-1	9.61808	Myosin
maker-pcu_contig_1050-fgenesh-gene-0.2-mRNA-1	182.991	Ubiquinol cytochrome c reductase subunit QCR9
maker-pcu_contig_1050-snap-gene-0.10-mRNA-1	19.0335	CG11266-PB, isoform B
maker-pcu_contig_1050-snap-gene-0.6-mRNA-1	28.1236	DNA-directed RNA polymerase III subunit RPC9
maker-pcu_contig_1050-snap-gene-0.7-mRNA-1	18.5156	Conserved gene of unknown function
maker-pcu_contig_10508-snap-gene-0.0-mRNA-1	9.46711	Conserved gene of unknown function
maker-pcu_contig_1054-snap-gene-0.2-mRNA-1	25.45	6-pyruvoyl tetrahydropterin synthase
maker-pcu_contig_1054-snap-gene-0.3-mRNA-1	71.334	ATP-dependent RNA helicase DBP2
maker-pcu_contig_1054-snap-gene-0.4-mRNA-1	11.9776	Animal inward rectifier K channel (IRK-C) family protein
maker-pcu_contig_1056-fgenesh-gene-0.1-mRNA-1	5.14499	Equilibrative Nucleoside Transporter (ENT) Family
maker-pcu_contig_1056-snap-gene-0.2-mRNA-1	5.14128	Drug/Metabolite Transporter (DMT) Superfamily
maker-pcu_contig_1056-snap-gene-0.3-mRNA-1	7.34809	Conserved gene of unknown function
maker-pcu_contig_1056-snap-gene-0.6-mRNA-1	8.52225	DNA-repair protein complementing XP-A cells
maker-pcu_contig_1057-snap-gene-0.5-mRNA-1	38.172	J1A crystallin
maker-pcu_contig_1057-snap-gene-0.6-mRNA-1	195.692	Conserved gene of unknown function
maker-pcu_contig_1058-fgenesh-gene-0.1-mRNA-1	32.281	Trehalose-phosphatase
maker-pcu_contig_1058-fgenesh-gene-0.2-mRNA-1	1407.68	Pyruvate kinase
maker-pcu_contig_1058-snap-gene-0.3-mRNA-1	7.12623	Aspartic protease
maker-pcu_contig_1058-snap-gene-0.4-mRNA-1	29.2078	Aspartyl protease family A01A
maker-pcu_contig_1058-snap-gene-0.5-mRNA-1	15.5346	GPN-loop GTPase 2
maker-pcu_contig_1059-fgenesh-gene-0.0-mRNA-1	14.43	T-complex protein 1 subunit eta
maker-pcu_contig_1059-fgenesh-gene-0.1-mRNA-1	9.92855	50S ribosomal protein L20
maker-pcu_contig_1059-snap-gene-0.4-mRNA-1	18.5715	Protein phosphatase
maker-pcu_contig_1059-snap-gene-0.5-mRNA-1	4.04728	Protein phosphatase
maker-pcu_contig_1059-snap-gene-0.7-mRNA-1	23.2091	Conserved gene of unknown function
maker-pcu_contig_1060-snap-gene-0.2-mRNA-1	20.1725	Conserved gene of unknown function
maker-pcu_contig_1060-snap-gene-0.3-mRNA-1	6.88713	Gene of unknown function
maker-pcu_contig_1060-snap-gene-0.5-mRNA-1	38.2136	Myosin
maker-pcu_contig_1062-snap-gene-0.2-mRNA-1	49.732	E3 ubiquitin ligase interacting with arginine methyltransferase (ISS)
maker-pcu_contig_1062-snap-gene-0.3-mRNA-1	16.3571	Mitotic checkpoint protein
maker-pcu_contig_1062-snap-gene-0.4-mRNA-1	44.1574	Trpc4-associated protein (Short transient receptor potential channel 4-associated protein)
maker-pcu_contig_10620-snap-gene-0.0-mRNA-1	36.0621	Conserved gene of unknown function
maker-pcu_contig_10626-snap-gene-0.0-mRNA-1	11.9349	Conserved gene of unknown function
maker-pcu_contig_10629-snap-gene-0.0-mRNA-1	8.66025	Gene of unknown function
maker-pcu_contig_10631-snap-gene-0.1-mRNA-1	16.9334	Crinkler (CRN) family protein
maker-pcu_contig_10634-snap-gene-0.0-mRNA-1	604.627	CK1 family protein kinase
maker-pcu_contig_10643-snap-gene-0.0-mRNA-1	11.0194	Protein kinase
maker-pcu_contig_10643-snap-gene-0.1-mRNA-1	4.79611	Protein kinase
maker-pcu_contig_1066-snap-gene-0.2-mRNA-1	4.29644	SWI4 1, Peter Pan suppressor
maker-pcu_contig_1066-snap-gene-0.5-mRNA-1	6.88269	Cation Diffusion Facilitator (CDF) Family
maker-pcu_contig_1066-snap-gene-0.6-mRNA-1	9.22137	Cation Diffusion Facilitator (CDF) Family
maker-pcu_contig_10669-snap-gene-0.1-mRNA-1	53.4638	Gene of unknown function
maker-pcu_contig_10669-snap-gene-0.2-mRNA-1	407.451	Conserved gene of unknown function
maker-pcu_contig_1067-snap-gene-0.3-mRNA-1	13.1483	SNF2 family superfamily II DNA/RNA helicase
maker-pcu_contig_1067-snap-gene-0.4-mRNA-1	8.5828	Sialidase
maker-pcu_contig_1067-snap-gene-0.5-mRNA-1	125.927	Cyclophilin A
maker-pcu_contig_1067-snap-gene-0.6-mRNA-1	19.1773	Molybdenum cofactor sulfurase
maker-pcu_contig_1068-snap-gene-0.2-mRNA-1	119.221	Choline/Carnitine O-acyltransferase
maker-pcu_contig_1068-snap-gene-0.3-mRNA-1	1061.15	CAMP-dependent protein kinase regulatory subunit
maker-pcu_contig_1068-snap-gene-0.4-mRNA-1	154.064	Succinate dehydrogenase flavoprotein subunit, mitochondrial
maker-pcu_contig_10689-snap-gene-0.1-mRNA-1	21.9165	Conserved gene of unknown function
maker-pcu_contig_10690-snap-gene-0.1-mRNA-1	41.8393	SNARE associated Golgi protein
maker-pcu_contig_1070-snap-gene-0.0-mRNA-1	4.24305	C2 domain-containing protein
maker-pcu_contig_1070-snap-gene-0.1-mRNA-1	49.548	Conserved gene of unknown function
maker-pcu_contig_1070-snap-gene-0.2-mRNA-1	549.947	Conserved gene of unknown function
maker-pcu_contig_1072-fgenesh-gene-0.0-mRNA-1	49.7488	Citrate synthase
maker-pcu_contig_1072-snap-gene-0.5-mRNA-1	48.7542	Conserved gene of unknown function
maker-pcu_contig_1072-snap-gene-0.6-mRNA-1	24.7067	Chitin synthase (Chitin-UDP-GlcNac-transferase)
maker-pcu_contig_1072-snap-gene-0.8-mRNA-1	1288.4	V-type proton ATPase 16 kDa proteolipid subunit
maker-pcu_contig_10725-snap-gene-0.0-mRNA-1	21.5153	Acyltransferase family
maker-pcu_contig_10725-snap-gene-0.1-mRNA-1	90.7264	Acyltransferase family
maker-pcu_contig_1074-fgenesh-gene-0.0-mRNA-1	20.2212	Band 7 protein
maker-pcu_contig_1074-fgenesh-gene-0.2-mRNA-1	9.14016	Serine hydrolase (FSH1)
maker-pcu_contig_1074-snap-gene-0.5-mRNA-1	730.512	Ubiquitin family protein
maker-pcu_contig_10746-fgenesh-gene-0.0-mRNA-1	20.6351	Pectage lyase
maker-pcu_contig_10746-snap-gene-0.2-mRNA-1	19.3345	Gene of unknown function
maker-pcu_contig_1075-snap-gene-0.0-mRNA-1	103.658	Conserved gene of unknown function
maker-pcu_contig_1075-snap-gene-0.1-mRNA-1	22.4631	Flagellar associated protein
maker-pcu_contig_1075-snap-gene-0.2-mRNA-1	6.84861	Gene of unknown function
maker-pcu_contig_10757-snap-gene-0.0-mRNA-1	2467.2	Butyrate response factor 1
maker-pcu_contig_10758-snap-gene-0.0-mRNA-1	83.9219	Gene of unknown function
maker-pcu_contig_10758-snap-gene-0.1-mRNA-1	99.6742	TRNA(Ile)-lysidine synthase
maker-pcu_contig_1077-snap-gene-0.0-mRNA-1	12.6973	Vertebrate dynactin 1 (P150, glued homolog, Drosophila)
maker-pcu_contig_1077-snap-gene-0.1-mRNA-1	14.5031	Conserved gene of unknown function
maker-pcu_contig_1077-snap-gene-0.2-mRNA-1	141.865	Isoform 2 of FYVE, RhoGEF and PH domain-containing protein 2
maker-pcu_contig_10774-snap-gene-0.0-mRNA-1	120.6	Inositol-3,4-bisphosphate 4-phosphatase
maker-pcu_contig_1078-snap-gene-0.0-mRNA-1	10.6737	Gene of unknown function
maker-pcu_contig_1078-snap-gene-0.1-mRNA-1	5.42783	Conserved gene of unknown function
maker-pcu_contig_1079-fgenesh-gene-0.1-mRNA-1	68.7547	Protein transporter Sec61 subunit alpha
maker-pcu_contig_1079-snap-gene-0.2-mRNA-1	26.7834	Conserved gene of unknown function
maker-pcu_contig_10792-snap-gene-0.1-mRNA-1	174.595	Conserved gene of unknown function
maker-pcu_contig_108-fgenesh-gene-0.2-mRNA-1	529.017	Atoep16-3
maker-pcu_contig_108-snap-gene-0.3-mRNA-1	4.8264	Ankyrin repeat protein
maker-pcu_contig_108-snap-gene-0.4-mRNA-1	7.12366	BWF1
maker-pcu_contig_108-snap-gene-0.5-mRNA-1	7.44023	Tubular mastigoneme protein
maker-pcu_contig_108-snap-gene-0.6-mRNA-1	102.544	Serine/threonine protein kinase
maker-pcu_contig_108-snap-gene-0.7-mRNA-1	23630.2	Conserved gene of unknown function
maker-pcu_contig_108-snap-gene-0.8-mRNA-1	343.794	C33H5.19 isoform 1
maker-pcu_contig_108-snap-gene-0.9-mRNA-1	101.896	Calcineurin B
maker-pcu_contig_1080-snap-gene-0.2-mRNA-1	9.67304	Gene of unknown function
maker-pcu_contig_1080-snap-gene-0.3-mRNA-1	6.32975	Conserved gene of unknown function
maker-pcu_contig_10809-snap-gene-0.0-mRNA-1	209.06	Pc20g13460 protein
maker-pcu_contig_1081-fgenesh-gene-0.0-mRNA-1	5.82879	C2 domain-containing protein
maker-pcu_contig_1081-snap-gene-0.1-mRNA-1	9.38783	Conserved gene of unknown function
maker-pcu_contig_1083-fgenesh-gene-0.1-mRNA-1	13.7491	Eukaryotic translation initiation factor 3 subunit H
maker-pcu_contig_1083-fgenesh-gene-0.3-mRNA-1	46.7957	KLLA0E16127p
maker-pcu_contig_1083-snap-gene-0.5-mRNA-1	55.8203	Ribulose-phosphate 3-epimerase
maker-pcu_contig_1083-snap-gene-0.9-mRNA-1	85.3295	MRNA turnover protein 4
maker-pcu_contig_10839-snap-gene-0.0-mRNA-1	111.569	Insulin-degrading-like enzyme, metalloprotease family M16A
maker-pcu_contig_1084-snap-gene-0.1-mRNA-1	38.9175	Protein kinase
maker-pcu_contig_1084-snap-gene-0.2-mRNA-1	2691.38	NLI interacting factor-like phosphatase
maker-pcu_contig_1084-snap-gene-0.3-mRNA-1	89.2227	Leucine-rich repeat containing protein
maker-pcu_contig_1084-snap-gene-0.4-mRNA-1	28.2708	Leucine carboxyl methyltransferase family protein
maker-pcu_contig_1085-fgenesh-gene-0.0-mRNA-1	28.0708	Homoserine O-acetyltransferase
maker-pcu_contig_10851-snap-gene-0.1-mRNA-1	17.4978	NPP1
maker-pcu_contig_10864-snap-gene-0.0-mRNA-1	4.81346	Gene of unknown function
maker-pcu_contig_10864-snap-gene-0.1-mRNA-1	12.8084	Gene of unknown function
maker-pcu_contig_1087-fgenesh-gene-0.1-mRNA-1	2409.09	60S ribosomal protein L35a-4
maker-pcu_contig_1087-snap-gene-0.2-mRNA-1	4.25351	DEAD/DEAH box RNA helicase
maker-pcu_contig_1088-snap-gene-0.4-mRNA-1	117.125	RING finger protein 11
maker-pcu_contig_1088-snap-gene-0.5-mRNA-1	5.09578	Gene of unknown function
maker-pcu_contig_10886-snap-gene-0.0-mRNA-1	21.0177	Conserved gene of unknown function
maker-pcu_contig_1089-snap-gene-0.2-mRNA-1	21.1607	Protein-tyrosine phosphatase mitochondrial 1, mitochondrial
maker-pcu_contig_1089-snap-gene-0.3-mRNA-1	2.71726	Conserved gene of unknown function
maker-pcu_contig_1089-snap-gene-0.4-mRNA-1	16.8764	ATP-dependent helicase
maker-pcu_contig_10893-snap-gene-0.0-mRNA-1	113.961	Calcineurin-like phosphoesterase
maker-pcu_contig_109-fgenesh-gene-0.4-mRNA-1	215.199	Transcriptional adapter 2-alpha
maker-pcu_contig_109-snap-gene-0.11-mRNA-1	33.6538	Conserved gene of unknown function
maker-pcu_contig_109-snap-gene-0.12-mRNA-1	351.15	Qc-SNARE protein, SYP7-family
maker-pcu_contig_109-snap-gene-0.15-mRNA-1	16.6398	N-(5'-phosphoribosyl)anthranilate isomerase
maker-pcu_contig_109-snap-gene-0.17-mRNA-1	86.5316	Crinkler (CRN) family protein
maker-pcu_contig_109-snap-gene-0.18-mRNA-1	263.906	Undecaprenyl pyrophosphate synthetase
maker-pcu_contig_109-snap-gene-0.20-mRNA-1	92.4651	Conserved gene of unknown function
maker-pcu_contig_109-snap-gene-0.7-mRNA-1	27.0792	Kinetochore protein NUF2
maker-pcu_contig_109-snap-gene-0.8-mRNA-1	75.0532	TRNA (Guanine-N(7)-)-methyltransferase
maker-pcu_contig_1090-fgenesh-gene-0.1-mRNA-1	4.96773	26S proteasome non-ATPase regulatory subunit 6
maker-pcu_contig_1090-snap-gene-0.2-mRNA-1	17.368	Splicing RNP complex component
maker-pcu_contig_1090-snap-gene-0.6-mRNA-1	97.9542	EF-hand domain-containing protein
maker-pcu_contig_10906-fgenesh-gene-0.0-mRNA-1	92.8425	Whole genome shotgun sequence assembly, scaffold_142
maker-pcu_contig_10908-snap-gene-0.0-mRNA-1	25.8075	Voltage-gated Ion Channel (VIC) Superfamily
maker-pcu_contig_1091-snap-gene-0.2-mRNA-1	76.2347	Rab11 family GTPase
maker-pcu_contig_1091-snap-gene-0.3-mRNA-1	15.0096	RabGAP/TBC domain-containing protein
maker-pcu_contig_1091-snap-gene-0.4-mRNA-1	94.2185	IMP-specific 5'-nucleotidase
maker-pcu_contig_10910-snap-gene-0.0-mRNA-1	26.7223	Conserved gene of unknown function
maker-pcu_contig_1092-snap-gene-0.2-mRNA-1	180.968	Type II (General) Secretory Pathway (IISP) Family
maker-pcu_contig_10922-snap-gene-0.0-mRNA-1	11.7174	Conserved gene of unknown function
maker-pcu_contig_10925-snap-gene-0.0-mRNA-1	10.2016	Conserved gene of unknown function
maker-pcu_contig_1093-fgenesh-gene-0.0-mRNA-1	36.4128	Nf-kappa B activating protein
maker-pcu_contig_1093-snap-gene-0.3-mRNA-1	4.04372	Conserved gene of unknown function
maker-pcu_contig_1093-snap-gene-0.4-mRNA-1	8.43888	Conserved gene of unknown function
maker-pcu_contig_10933-snap-gene-0.0-mRNA-1	4.24779	HECT E3 ubiquitin ligase
maker-pcu_contig_1094-fgenesh-gene-0.1-mRNA-1	53.4207	Phosphoglycerate mutase
maker-pcu_contig_1094-snap-gene-0.2-mRNA-1	38.3226	DNA replication licensing factor MCM5
maker-pcu_contig_1095-fgenesh-gene-0.0-mRNA-1	119.168	Cysteine protease family C15
maker-pcu_contig_1095-snap-gene-0.2-mRNA-1	21.9499	Transposase
maker-pcu_contig_10950-snap-gene-0.1-mRNA-1	84.3018	Aspartyl/glutamyl-tRNA(Asn/Gln) amidotransferase subunit B
maker-pcu_contig_10966-fgenesh-gene-0.0-mRNA-1	21.0087	Glutathione peroxidase
maker-pcu_contig_1099-snap-gene-0.1-mRNA-1	201.354	Nuclear protein UKp68 isoform 2 isoform 7
maker-pcu_contig_10995-fgenesh-gene-0.0-mRNA-1	4.53834	Polysaccharide lyase
maker-pcu_contig_10998-snap-gene-0.0-mRNA-1	10.4129	NPP1
maker-pcu_contig_10999-snap-gene-0.0-mRNA-1	8.99534	Conserved gene of unknown function
maker-pcu_contig_11-fgenesh-gene-0.7-mRNA-1	28.7493	Threonine protease family T01A
maker-pcu_contig_11-snap-gene-0.13-mRNA-1	6.80874	Liver stage antigen
maker-pcu_contig_11-snap-gene-0.15-mRNA-1	74.8246	SNARE associated Golgi protein
maker-pcu_contig_11-snap-gene-0.16-mRNA-1	67.4154	DNA repair protein RAD51
maker-pcu_contig_11-snap-gene-0.18-mRNA-1	131.031	ATP-binding Cassette (ABC) Superfamily
maker-pcu_contig_11-snap-gene-0.19-mRNA-1	14.4944	CLIP-associating protein 1
maker-pcu_contig_11-snap-gene-0.20-mRNA-1	13.091	Conserved gene of unknown function
maker-pcu_contig_11-snap-gene-0.23-mRNA-1	37.1035	Mitogen-activated protein kinase kinase
maker-pcu_contig_11-snap-gene-0.25-mRNA-1	6.38892	DENND4A protein
maker-pcu_contig_11-snap-gene-0.26-mRNA-1	7.10508	Conserved gene of unknown function
maker-pcu_contig_11-snap-gene-0.27-mRNA-1	10.7128	Protein NLRC3
maker-pcu_contig_11-snap-gene-0.28-mRNA-1	4.91855	Cytochrome P450
maker-pcu_contig_110-snap-gene-0.11-mRNA-1	38.4567	Diaminopimelate decarboxylase
maker-pcu_contig_110-snap-gene-0.4-mRNA-1	75.651	Gene of unknown function
maker-pcu_contig_110-snap-gene-0.5-mRNA-1	44.3538	Ankyrin
maker-pcu_contig_110-snap-gene-0.6-mRNA-1	5.33685	GPI mannosyltransferase
maker-pcu_contig_110-snap-gene-0.7-mRNA-1	4.4497	Translation initiation factor IF-2
maker-pcu_contig_110-snap-gene-0.8-mRNA-1	63.9054	ATP-binding Cassette (ABC) Superfamily
maker-pcu_contig_1100-snap-gene-0.2-mRNA-1	516.804	Flagellar associated protein
maker-pcu_contig_1100-snap-gene-0.3-mRNA-1	8.15732	Nucleolar GTP-binding protein 1
maker-pcu_contig_11014-fgenesh-gene-0.0-mRNA-1	10.7718	Carbohydrate-binding protein
maker-pcu_contig_1103-snap-gene-0.3-mRNA-1	17.0042	Coiled-coil domain-containing protein
maker-pcu_contig_1103-snap-gene-0.4-mRNA-1	67.8736	Diacylglycerol O-acyltransferase
maker-pcu_contig_1103-snap-gene-0.5-mRNA-1	118.65	Conserved gene of unknown function
maker-pcu_contig_1103-snap-gene-0.6-mRNA-1	36.7997	Conserved gene of unknown function
maker-pcu_contig_11036-snap-gene-0.0-mRNA-1	6.69132	Cleavage and polyadenylation specificity factor subunit
maker-pcu_contig_1104-fgenesh-gene-0.1-mRNA-1	175.499	Conserved gene of unknown function
maker-pcu_contig_1104-snap-gene-0.2-mRNA-1	90.9775	Phosphatidylserine decarboxylase
maker-pcu_contig_1105-snap-gene-0.10-mRNA-1	11.2024	H/ACA ribonucleoprotein complex subunit 4
maker-pcu_contig_1105-snap-gene-0.5-mRNA-1	1478.18	60S ribosomal protein L8
maker-pcu_contig_1105-snap-gene-0.7-mRNA-1	4.99764	U3 small nucleolar ribonucleoprotein protein IMP3
maker-pcu_contig_1105-snap-gene-0.8-mRNA-1	17.3153	Conserved gene of unknown function
maker-pcu_contig_1105-snap-gene-0.9-mRNA-1	35.0356	Conserved gene of unknown function
maker-pcu_contig_1106-snap-gene-0.2-mRNA-1	7.29141	Glycerol-3-phosphate acyltransferase
maker-pcu_contig_1107-snap-gene-0.2-mRNA-1	9.41104	DNA-directed RNA polymerase
maker-pcu_contig_1107-snap-gene-0.3-mRNA-1	15.3098	Conserved gene of unknown function
maker-pcu_contig_1108-snap-gene-0.4-mRNA-1	1464.22	Secretory protein OPEL
maker-pcu_contig_11096-snap-gene-0.1-mRNA-1	194.75	Conserved gene of unknown function
maker-pcu_contig_1110-fgenesh-gene-0.3-mRNA-1	5.70556	Conserved gene of unknown function
maker-pcu_contig_1110-fgenesh-gene-0.4-mRNA-1	336.747	Thioredoxin
maker-pcu_contig_1110-snap-gene-0.5-mRNA-1	21.077	Conserved gene of unknown function
maker-pcu_contig_1110-snap-gene-0.7-mRNA-1	56.5355	Riboflavin biosynthesis protein ribBA
maker-pcu_contig_1111-snap-gene-0.5-mRNA-1	133.202	Conserved gene of unknown function
maker-pcu_contig_11110-snap-gene-0.1-mRNA-1	4.40091	Conserved gene of unknown function
maker-pcu_contig_11131-fgenesh-gene-0.0-mRNA-1	24.0876	Gene of unknown function
maker-pcu_contig_11147-snap-gene-0.1-mRNA-1	211.858	GAMYB-binding protein
maker-pcu_contig_11148-fgenesh-gene-0.0-mRNA-1	1013.55	40S ribosomal protein S11
maker-pcu_contig_1115-snap-gene-0.3-mRNA-1	47.0882	Sel1 domain protein repeat-containing protein
maker-pcu_contig_1115-snap-gene-0.4-mRNA-1	220.054	MRNA capping enzyme
maker-pcu_contig_1115-snap-gene-0.5-mRNA-1	25.8186	Sodium-coupled neutral amino acid transporter
maker-pcu_contig_1116-fgenesh-gene-0.0-mRNA-1	452.203	Carbonic anhydrase
maker-pcu_contig_1116-snap-gene-0.4-mRNA-1	25.8058	Pseudouridine synthase
maker-pcu_contig_1118-snap-gene-0.3-mRNA-1	17.7027	Conserved gene of unknown function
maker-pcu_contig_1118-snap-gene-0.5-mRNA-1	20.8846	Conserved gene of unknown function
maker-pcu_contig_11186-snap-gene-0.0-mRNA-1	35.7464	Marine cyanobacterial conserved hypothetical
maker-pcu_contig_1119-snap-gene-0.4-mRNA-1	33.6275	Conserved gene of unknown function
maker-pcu_contig_1119-snap-gene-0.6-mRNA-1	5.28774	Conserved gene of unknown function
maker-pcu_contig_11190-snap-gene-0.0-mRNA-1	24.4423	Phosphatidic acid phosphatase
maker-pcu_contig_11192-snap-gene-0.2-mRNA-1	9.83157	Exocyst complex component
maker-pcu_contig_112-fgenesh-gene-0.2-mRNA-1	2473.61	Conserved gene of unknown function
maker-pcu_contig_112-fgenesh-gene-0.7-mRNA-1	35.6054	Protein disulfide-isomerase
maker-pcu_contig_112-snap-gene-0.12-mRNA-1	5.11135	Gene of unknown function
maker-pcu_contig_112-snap-gene-0.13-mRNA-1	13.7919	CDK5 and ABL1 enzyme substrate 1
maker-pcu_contig_112-snap-gene-0.15-mRNA-1	4.37924	Conserved gene of unknown function
maker-pcu_contig_112-snap-gene-0.17-mRNA-1	15.5741	N(6)-adenine-specific DNA methyltransferase
maker-pcu_contig_112-snap-gene-0.18-mRNA-1	8.80376	Zinc finger FYVE domain containing protein 28
maker-pcu_contig_112-snap-gene-0.20-mRNA-1	7.29703	Gene of unknown function
maker-pcu_contig_1120-fgenesh-gene-0.0-mRNA-1	156.602	Histamine-releasing factor
maker-pcu_contig_1120-snap-gene-0.3-mRNA-1	26.2023	WD repeat protein 31.
maker-pcu_contig_1120-snap-gene-0.5-mRNA-1	67.5622	Conserved gene of unknown function
maker-pcu_contig_1120-snap-gene-0.6-mRNA-1	19.5372	Conserved gene of unknown function
maker-pcu_contig_11213-snap-gene-0.0-mRNA-1	217.588	Conserved gene of unknown function
maker-pcu_contig_11213-snap-gene-0.1-mRNA-1	15.6168	Conserved gene of unknown function
maker-pcu_contig_11216-snap-gene-0.0-mRNA-1	60.6486	Phosphoinositol transporter
maker-pcu_contig_11216-snap-gene-0.1-mRNA-1	51.042	Phosphoinositol transporter
maker-pcu_contig_1122-snap-gene-0.1-mRNA-1	9.4335	Polycomb
maker-pcu_contig_1122-snap-gene-0.2-mRNA-1	16.9151	Conserved gene of unknown function
maker-pcu_contig_1122-snap-gene-0.3-mRNA-1	28.4053	Conserved gene of unknown function
maker-pcu_contig_1122-snap-gene-0.4-mRNA-1	113.461	Gene of unknown function
maker-pcu_contig_1123-fgenesh-gene-0.0-mRNA-1	25.3828	Protein disulfide-isomerase
maker-pcu_contig_1123-snap-gene-0.1-mRNA-1	5.54839	(Fragment)
maker-pcu_contig_1123-snap-gene-0.3-mRNA-1	18.6255	Conserved gene of unknown function
maker-pcu_contig_11230-snap-gene-0.0-mRNA-1	17.5865	Polyprotein
maker-pcu_contig_1124-snap-gene-0.3-mRNA-1	4.59374	E3 ubiquitin-protein ligase bre-1
maker-pcu_contig_1124-snap-gene-0.5-mRNA-1	51.9056	Membrane protein
maker-pcu_contig_1125-snap-gene-0.1-mRNA-1	32.4147	Isoform 2 of Putative E3 ubiquitin-protein ligase XBAT35
maker-pcu_contig_1125-snap-gene-0.2-mRNA-1	64.9269	SEC14 cytosolic factor
maker-pcu_contig_1125-snap-gene-0.5-mRNA-1	84.5009	CDP-alcohol phosphatidyltransferase superfamily
maker-pcu_contig_1126-fgenesh-gene-0.0-mRNA-1	61.8563	Biotin-protein ligase
maker-pcu_contig_1126-snap-gene-0.6-mRNA-1	170.792	Conserved gene of unknown function
maker-pcu_contig_1127-snap-gene-0.2-mRNA-1	69.8734	DnaJ protein
maker-pcu_contig_1128-snap-gene-0.2-mRNA-1	25.4603	Sestrin
maker-pcu_contig_11281-snap-gene-0.1-mRNA-1	10.6169	Multiple inositol polyphosphate phosphatase 1
maker-pcu_contig_11283-snap-gene-0.1-mRNA-1	160.047	Phosphatidylinositol kinase
maker-pcu_contig_11287-snap-gene-0.0-mRNA-1	10.5307	Ubiquitination factor E4B
maker-pcu_contig_1129-snap-gene-0.1-mRNA-1	24.8517	Conserved gene of unknown function
maker-pcu_contig_1129-snap-gene-0.2-mRNA-1	53.2693	AFG1-family ATPase
maker-pcu_contig_1129-snap-gene-0.3-mRNA-1	16.0105	Conserved gene of unknown function
maker-pcu_contig_1129-snap-gene-0.4-mRNA-1	10.2457	TRNA-specific 2-thiouridylase mnmA
maker-pcu_contig_11292-snap-gene-0.1-mRNA-1	47.8522	Conserved gene of unknown function
maker-pcu_contig_113-snap-gene-0.11-mRNA-1	14.4686	Conserved gene of unknown function
maker-pcu_contig_113-snap-gene-0.14-mRNA-1	0.486913	UNCoordinated family member (unc-44)
maker-pcu_contig_113-snap-gene-0.18-mRNA-1	6.58186	3-demethylubiquinone-9 3-methyltransferase
maker-pcu_contig_113-snap-gene-0.19-mRNA-1	58.1367	Sorting nexin 1
maker-pcu_contig_113-snap-gene-0.20-mRNA-1	8.62775	Conserved hypothetical protein
maker-pcu_contig_113-snap-gene-0.21-mRNA-1	6.52935	Ca2 :Cation Antiporter (CaCA) Family
maker-pcu_contig_1131-fgenesh-gene-0.1-mRNA-1	106.619	Mitochondrial ribosomal protein L28
maker-pcu_contig_1131-snap-gene-0.2-mRNA-1	178.499	Protein phosphatase 2C
maker-pcu_contig_1131-snap-gene-0.4-mRNA-1	450.57	Transmembrane protein
maker-pcu_contig_1131-snap-gene-0.5-mRNA-1	44.555	Secreted RxLR effector peptide protein
maker-pcu_contig_11313-snap-gene-0.0-mRNA-1	10.1711	Conserved gene of unknown function
maker-pcu_contig_11316-snap-gene-0.1-mRNA-1	12.2947	Glutamyl-tRNA synthetase
maker-pcu_contig_11319-snap-gene-0.1-mRNA-1	11.2619	Proline-rich beta protein
maker-pcu_contig_1133-snap-gene-0.0-mRNA-1	6.63526	F-box/LRR-repeat protein 13 (F-box and leucine-rich repeat protein 13).
maker-pcu_contig_11351-snap-gene-0.1-mRNA-1	66.3852	Pc22g22670 protein
maker-pcu_contig_11352-fgenesh-gene-0.0-mRNA-1	12.8733	U6 snRNA-associated Sm LSm6
maker-pcu_contig_11376-snap-gene-0.1-mRNA-1	95.5943	Flagella associated protein
maker-pcu_contig_1138-snap-gene-0.1-mRNA-1	5.82094	Centrosomal protein 120
maker-pcu_contig_1138-snap-gene-0.2-mRNA-1	19.0508	Coiled-coil domain containing 100
maker-pcu_contig_1138-snap-gene-0.3-mRNA-1	126.181	GK16278
maker-pcu_contig_114-fgenesh-gene-0.0-mRNA-1	65.2669	Conserved gene of unknown function
maker-pcu_contig_114-snap-gene-0.11-mRNA-1	6.87152	WD repeat, SAM and U-box domain containing 1
maker-pcu_contig_114-snap-gene-0.12-mRNA-1	18.5739	Gene of unknown function
maker-pcu_contig_114-snap-gene-0.13-mRNA-1	31.7571	TrkA3
maker-pcu_contig_114-snap-gene-0.14-mRNA-1	43.9634	Homeodomain transcription factor
maker-pcu_contig_114-snap-gene-0.16-mRNA-1	7.48395	TRNA (Guanine-N(7)-)-methyltransferase
maker-pcu_contig_114-snap-gene-0.17-mRNA-1	53.5005	F-box protein
maker-pcu_contig_114-snap-gene-0.8-mRNA-1	154.62	Maintenance of ploidy protein mob1
maker-pcu_contig_114-snap-gene-0.9-mRNA-1	39.2602	BEACH domain-containing protein
maker-pcu_contig_1140-snap-gene-0.4-mRNA-1	71.0033	NADH-cytochrome b5 reductase
maker-pcu_contig_1140-snap-gene-0.6-mRNA-1	460.996	Phosphoglycerate mutase family protein
maker-pcu_contig_1140-snap-gene-0.7-mRNA-1	16.7849	Conserved gene of unknown function
maker-pcu_contig_11406-snap-gene-0.0-mRNA-1	9.87852	Mucin
maker-pcu_contig_1141-snap-gene-0.1-mRNA-1	5.43864	MAP kinase phosphatase 6
maker-pcu_contig_1141-snap-gene-0.2-mRNA-1	2696.27	Conserved gene of unknown function
maker-pcu_contig_1141-snap-gene-0.3-mRNA-1	164.397	Protein kinase
maker-pcu_contig_11427-snap-gene-0.0-mRNA-1	10.2505	Phosphatidylinositol kinase (PIK-5)
maker-pcu_contig_1143-snap-gene-0.2-mRNA-1	8.47576	Phosphoglycerate mutase
maker-pcu_contig_1143-snap-gene-0.5-mRNA-1	107.824	Alkaline phosphatase
maker-pcu_contig_1143-snap-gene-0.6-mRNA-1	24.4263	Alkaline phosphatase
maker-pcu_contig_11439-snap-gene-0.0-mRNA-1	178.755	Rab3 GTPase-activating protein catalytic subunit
maker-pcu_contig_11460-snap-gene-0.0-mRNA-1	4.91552	NPP1
maker-pcu_contig_11466-snap-gene-0.0-mRNA-1	21.7443	Conserved gene of unknown function
maker-pcu_contig_11469-snap-gene-0.0-mRNA-1	114.455	Pre-mRNA-splicing factor cwc2
maker-pcu_contig_11469-snap-gene-0.1-mRNA-1	58.9254	Pre-mRNA-splicing factor cwc2
maker-pcu_contig_1147-snap-gene-0.3-mRNA-1	25.9946	Glycine-rich RNA-binding protein blt801
maker-pcu_contig_1147-snap-gene-0.4-mRNA-1	37.6515	Mitochondrial inner membrane protease subunit
maker-pcu_contig_1147-snap-gene-0.5-mRNA-1	6.04555	CASP
maker-pcu_contig_1147-snap-gene-0.6-mRNA-1	15.0748	TPR Domain containing protein
maker-pcu_contig_1148-snap-gene-0.1-mRNA-1	86.3922	Transient receptor potential Ca2 channel (TRP-CC) family protein
maker-pcu_contig_1148-snap-gene-0.2-mRNA-1	382.293	Conserved gene of unknown function
maker-pcu_contig_11506-snap-gene-0.1-mRNA-1	18.6819	Protein MYG1
maker-pcu_contig_1151-fgenesh-gene-0.1-mRNA-1	7829.34	Mouse mpv17 protein
maker-pcu_contig_1151-snap-gene-0.6-mRNA-1	4.44363	Nucleolar protein 6
maker-pcu_contig_1151-snap-gene-0.7-mRNA-1	45.2933	Epsin-3 (EPS-15-interacting protein 3).
maker-pcu_contig_1153-snap-gene-0.4-mRNA-1	52.7064	Gamma-secretase subunit Aph-1
maker-pcu_contig_11544-snap-gene-0.0-mRNA-1	9.24186	Hydroxyacylglutathione hydrolase
maker-pcu_contig_11547-snap-gene-0.0-mRNA-1	74.6653	Zgc:112095
maker-pcu_contig_1155-snap-gene-0.3-mRNA-1	8.13798	LRR-GTPase of the ROCO family
maker-pcu_contig_11564-snap-gene-0.0-mRNA-1	5.25443	Serine protease family S08A
maker-pcu_contig_1157-snap-gene-0.3-mRNA-1	9.44338	Dynein 1 light intermediate chain
maker-pcu_contig_1157-snap-gene-0.4-mRNA-1	12.6528	Molybdopterin binding domain protein
maker-pcu_contig_1157-snap-gene-0.5-mRNA-1	21.8241	Enhancer of mRNA-decapping protein
maker-pcu_contig_11574-snap-gene-0.0-mRNA-1	15.501	Gene of unknown function
maker-pcu_contig_11577-snap-gene-0.1-mRNA-1	4.0895	P-type ATPase (P-ATPase) Superfamily
maker-pcu_contig_1159-snap-gene-0.2-mRNA-1	12.132	Palmitoyltransferase
maker-pcu_contig_1159-snap-gene-0.3-mRNA-1	42.1422	Palmitoyltransferase
maker-pcu_contig_1159-snap-gene-0.4-mRNA-1	263.221	Conserved gene of unknown function
maker-pcu_contig_11592-snap-gene-0.0-mRNA-1	11.3039	Conserved gene of unknown function
maker-pcu_contig_11598-snap-gene-0.1-mRNA-1	8.66569	Magnesium-dependent phosphatase 1
maker-pcu_contig_116-snap-gene-0.12-mRNA-1	8.66488	Jerky homolog
maker-pcu_contig_116-snap-gene-0.15-mRNA-1	461.09	Antigenic protein
maker-pcu_contig_116-snap-gene-0.17-mRNA-1	5056.67	Conserved gene of unknown function
maker-pcu_contig_116-snap-gene-0.18-mRNA-1	400.941	Ankyrin repeat-containing protein
maker-pcu_contig_116-snap-gene-0.7-mRNA-1	19.0386	HECT E3 ubiquitin ligase
maker-pcu_contig_116-snap-gene-0.9-mRNA-1	237.233	Conserved gene of unknown function
maker-pcu_contig_11607-snap-gene-0.0-mRNA-1	102.279	Glucanase inhibitor protein 1
maker-pcu_contig_1161-fgenesh-gene-0.2-mRNA-1	18.4762	Protein T28D6.7, partially confirmed by transcript evidence
maker-pcu_contig_1161-snap-gene-0.3-mRNA-1	41.722	Soluble NSF Attachment Protein (SNAP) Receptor (SNARE)
maker-pcu_contig_1161-snap-gene-0.4-mRNA-1	29.8576	Serine/threonine protein kinase
maker-pcu_contig_11619-snap-gene-0.0-mRNA-1	148.862	Gene of unknown function
maker-pcu_contig_1162-snap-gene-0.3-mRNA-1	4.24582	Conserved gene of unknown function
maker-pcu_contig_11627-snap-gene-0.1-mRNA-1	13.1956	Cell division protease ftsH
maker-pcu_contig_1163-snap-gene-0.1-mRNA-1	10.4524	Haloacid dehalogenase superfamily protein
maker-pcu_contig_1163-snap-gene-0.2-mRNA-1	48.4165	Haloacid dehalogenase superfamily protein
maker-pcu_contig_1163-snap-gene-0.3-mRNA-1	20.7432	FGFR1 oncogene partner
maker-pcu_contig_1163-snap-gene-0.4-mRNA-1	18.2278	Conserved gene of unknown function
maker-pcu_contig_1163-snap-gene-0.5-mRNA-1	19.4039	Conserved gene of unknown function
maker-pcu_contig_1163-snap-gene-0.6-mRNA-1	55.0103	Conserved gene of unknown function
maker-pcu_contig_1165-snap-gene-0.1-mRNA-1	104.533	Syntaxin 7
maker-pcu_contig_11652-snap-gene-0.1-mRNA-1	5569.75	Ubiquitin-conjugating enzyme E2
maker-pcu_contig_1166-fgenesh-gene-0.1-mRNA-1	29.2515	Conserved gene of unknown function
maker-pcu_contig_1166-snap-gene-0.2-mRNA-1	10.7093	Conserved gene of unknown function
maker-pcu_contig_1166-snap-gene-0.4-mRNA-1	23.0814	DNA ligase
maker-pcu_contig_1167-snap-gene-0.3-mRNA-1	26.8666	Zinc finger SWIM domain-containing protein 7
maker-pcu_contig_1167-snap-gene-0.4-mRNA-1	22.5474	Protein MCM10 homolog
maker-pcu_contig_1167-snap-gene-0.5-mRNA-1	62.0148	Glycoside hydrolase
maker-pcu_contig_1167-snap-gene-0.6-mRNA-1	16.3294	Conserved gene of unknown function
maker-pcu_contig_1168-fgenesh-gene-0.2-mRNA-1	7.91934	Dpy-30 motif family protein
maker-pcu_contig_1168-snap-gene-0.3-mRNA-1	20.4402	Conserved gene of unknown function
maker-pcu_contig_1168-snap-gene-0.6-mRNA-1	18.5686	Conserved gene of unknown function
maker-pcu_contig_1168-snap-gene-0.7-mRNA-1	93.1312	Gene of unknown function
maker-pcu_contig_1169-snap-gene-0.1-mRNA-1	27.791	Beclin-1
maker-pcu_contig_1169-snap-gene-0.3-mRNA-1	86.6077	Conserved gene of unknown function
maker-pcu_contig_117-fgenesh-gene-0.2-mRNA-1	10.3534	Histidinol dehydrogenase
maker-pcu_contig_117-snap-gene-0.10-mRNA-1	6.15326	Actin
maker-pcu_contig_117-snap-gene-0.11-mRNA-1	5.3584	Metalloprotease family M14B
maker-pcu_contig_117-snap-gene-0.12-mRNA-1	4.46819	Leucine rich repeat containing 1
maker-pcu_contig_117-snap-gene-0.3-mRNA-1	7.18625	Gene of unknown function
maker-pcu_contig_117-snap-gene-0.4-mRNA-1	15.8199	Conserved gene of unknown function
maker-pcu_contig_117-snap-gene-0.5-mRNA-1	4.23539	GTP-binding protein engB
maker-pcu_contig_117-snap-gene-0.6-mRNA-1	29.9993	IQ and AAA domain-containing protein
maker-pcu_contig_117-snap-gene-0.8-mRNA-1	10.6252	Transmembrane protein
maker-pcu_contig_117-snap-gene-0.9-mRNA-1	59.775	Gene of unknown function
maker-pcu_contig_11707-snap-gene-0.0-mRNA-1	9.05395	DNA ligase
maker-pcu_contig_1171-snap-gene-0.4-mRNA-1	5.88393	DNA-binding protein p24
maker-pcu_contig_1171-snap-gene-0.6-mRNA-1	4.30033	Methyltransferase domain family protein
maker-pcu_contig_1171-snap-gene-0.7-mRNA-1	17.6864	Mitochondrial Protein Translocase (MPT) Family
maker-pcu_contig_1171-snap-gene-0.8-mRNA-1	9.54578	Conserved gene of unknown function
maker-pcu_contig_11719-snap-gene-0.1-mRNA-1	86.7507	Conserved gene of unknown function
maker-pcu_contig_1172-snap-gene-0.4-mRNA-1	12.3063	GI15442
maker-pcu_contig_1172-snap-gene-0.5-mRNA-1	10.751	Nicotinate phosphoribosyltransferase
maker-pcu_contig_1172-snap-gene-0.6-mRNA-1	10.0521	Transmembrane protein
maker-pcu_contig_11721-snap-gene-0.0-mRNA-1	4.27405	Conserved gene of unknown function
maker-pcu_contig_11726-snap-gene-0.0-mRNA-1	18.4148	Secreted protein
maker-pcu_contig_1174-snap-gene-0.3-mRNA-1	9.42263	Vesicle transport through interaction with t-SNAREs homolog 1B
maker-pcu_contig_1174-snap-gene-0.5-mRNA-1	7.68164	T-complex protein 1 subunit zeta
maker-pcu_contig_1174-snap-gene-0.6-mRNA-1	77.7427	Protein containing QXW lectin repeats
maker-pcu_contig_11744-snap-gene-0.1-mRNA-1	13.6906	Urocanase
maker-pcu_contig_11758-snap-gene-0.0-mRNA-1	2083.28	Endo-alpha-1,5-arabinanase
maker-pcu_contig_11760-snap-gene-0.0-mRNA-1	201.176	Conserved gene of unknown function
maker-pcu_contig_11760-snap-gene-0.1-mRNA-1	80.5899	Gene of unknown function
maker-pcu_contig_11767-snap-gene-0.1-mRNA-1	90.1175	Gene of unknown function
maker-pcu_contig_1177-fgenesh-gene-0.0-mRNA-1	6.33373	Hook homolog 2 (h-hook2)
maker-pcu_contig_1177-snap-gene-0.1-mRNA-1	8.86892	Cytoskeleton-associated protein
maker-pcu_contig_11779-snap-gene-0.0-mRNA-1	1.55148	Conserved gene of unknown function
maker-pcu_contig_11779-snap-gene-0.1-mRNA-1	6.30061	Conserved gene of unknown function
maker-pcu_contig_11784-fgenesh-gene-0.0-mRNA-1	15.2314	Conserved gene of unknown function
maker-pcu_contig_11785-snap-gene-0.0-mRNA-1	7.71937	Conserved gene of unknown function
maker-pcu_contig_1179-fgenesh-gene-0.0-mRNA-1	19.0428	Receptor expression-enhancing protein 5
maker-pcu_contig_1179-snap-gene-0.5-mRNA-1	6.13308	Component of SCAR regulatory complex
maker-pcu_contig_1179-snap-gene-0.6-mRNA-1	21.7086	Ubiquitin-conjugating enzyme E2
maker-pcu_contig_11798-snap-gene-0.1-mRNA-1	29.7071	RMD5 family protein
maker-pcu_contig_118-fgenesh-gene-0.1-mRNA-1	16.8298	Conserved gene of unknown function
maker-pcu_contig_118-fgenesh-gene-0.2-mRNA-1	83.4993	Conserved gene of unknown function
maker-pcu_contig_118-snap-gene-0.12-mRNA-1	10.7642	Conserved gene of unknown function
maker-pcu_contig_118-snap-gene-0.13-mRNA-1	4.20098	Drug/Metabolite Transporter (DMT) Superfamily
maker-pcu_contig_118-snap-gene-0.14-mRNA-1	370.312	TBC1 domain family, member 23
maker-pcu_contig_118-snap-gene-0.15-mRNA-1	15.291	Conserved gene of unknown function
maker-pcu_contig_118-snap-gene-0.16-mRNA-1	6.38232	Hect domain and RLD 2
maker-pcu_contig_1180-snap-gene-0.3-mRNA-1	51.1126	Conserved gene of unknown function
maker-pcu_contig_11806-snap-gene-0.1-mRNA-1	93.4733	Lysocardiolipin acyltransferase
maker-pcu_contig_11808-snap-gene-0.0-mRNA-1	16.7453	Thioredoxin reductase 1
maker-pcu_contig_11810-snap-gene-0.0-mRNA-1	8.34906	Secreted RxLR effector peptide protein
maker-pcu_contig_11812-snap-gene-0.0-mRNA-1	8.94486	DNA binding protein
maker-pcu_contig_1182-fgenesh-gene-0.1-mRNA-1	136.171	Conserved gene of unknown function
maker-pcu_contig_1182-snap-gene-0.3-mRNA-1	4.37007	Glycoprotein-N-acetylgalactosamine 3-beta-galactosyltransferase
maker-pcu_contig_1182-snap-gene-0.7-mRNA-1	8.69445	Conserved gene of unknown function
maker-pcu_contig_11822-snap-gene-0.0-mRNA-1	264.707	Mucin
maker-pcu_contig_11830-snap-gene-0.1-mRNA-1	9.65754	Scavenger mRNA-decapping enzyme DcpS
maker-pcu_contig_11839-snap-gene-0.1-mRNA-1	6.48992	Jumonji domain containing 4
maker-pcu_contig_1184-fgenesh-gene-0.0-mRNA-1	221.95	Gene of unknown function
maker-pcu_contig_1184-snap-gene-0.1-mRNA-1	7.088	2',5'-phosphodiesterase
maker-pcu_contig_1184-snap-gene-0.2-mRNA-1	4.30749	Conserved gene of unknown function
maker-pcu_contig_1184-snap-gene-0.3-mRNA-1	8.27444	Conserved gene of unknown function
maker-pcu_contig_1184-snap-gene-0.5-mRNA-1	14.9627	Gene of unknown function
maker-pcu_contig_11848-snap-gene-0.0-mRNA-1	33.0259	Conserved gene of unknown function
maker-pcu_contig_11859-snap-gene-0.1-mRNA-1	49.3356	Alternative oxidase, mitochondrial
maker-pcu_contig_11859-snap-gene-0.2-mRNA-1	49.2393	Alternative oxidase, mitochondrial
maker-pcu_contig_11862-snap-gene-0.1-mRNA-1	29.3239	Colon cancer-associated protein Mic1-like containing protein
maker-pcu_contig_1188-snap-gene-0.0-mRNA-1	636.81	Conserved gene of unknown function
maker-pcu_contig_1189-snap-gene-0.0-mRNA-1	38.1493	Transposase
maker-pcu_contig_1189-snap-gene-0.1-mRNA-1	24.7436	Conserved gene of unknown function
maker-pcu_contig_1189-snap-gene-0.3-mRNA-1	10.4684	ATPase or kinase
maker-pcu_contig_119-fgenesh-gene-0.5-mRNA-1	58.5058	Peptidyl-prolyl cis-trans isomerase E
maker-pcu_contig_119-fgenesh-gene-0.7-mRNA-1	141.742	Conserved gene of unknown function
maker-pcu_contig_119-snap-gene-0.10-mRNA-1	182.686	Regulator of chromosome condensation domain-containing protein
maker-pcu_contig_119-snap-gene-0.12-mRNA-1	30.5682	GTP-binding protein TypA/BipA
maker-pcu_contig_119-snap-gene-0.13-mRNA-1	56.9798	CG31320-PA
maker-pcu_contig_119-snap-gene-0.14-mRNA-1	368.14	ChaC-like family protein
maker-pcu_contig_119-snap-gene-0.15-mRNA-1	11.0901	Conserved gene of unknown function
maker-pcu_contig_119-snap-gene-0.19-mRNA-1	8.64375	Sorting and assembly machinery component 50
maker-pcu_contig_119-snap-gene-0.20-mRNA-1	269.68	H-or Na-translocating F-type, V-type and A-type ATPase (F-ATPase) Superfamily
maker-pcu_contig_11906-snap-gene-0.1-mRNA-1	59.9532	Catalase
maker-pcu_contig_1191-fgenesh-gene-0.0-mRNA-1	68.268	RNA polymerase-associated protein LEO1
maker-pcu_contig_1191-snap-gene-0.3-mRNA-1	16.4467	Exonuclease
maker-pcu_contig_1193-snap-gene-0.1-mRNA-1	5.68563	Protein kinase
maker-pcu_contig_1193-snap-gene-0.3-mRNA-1	16.9534	Calmodulin binding protein
maker-pcu_contig_1193-snap-gene-0.4-mRNA-1	9.87349	Ribosomal RNA-processing protein
maker-pcu_contig_11959-snap-gene-0.0-mRNA-1	5.1782	Conserved gene of unknown function
maker-pcu_contig_11966-fgenesh-gene-0.0-mRNA-1	10.6619	Conserved gene of unknown function
maker-pcu_contig_1197-snap-gene-0.3-mRNA-1	28.2282	Putative HRAS-like suppressor variant 3
maker-pcu_contig_1197-snap-gene-0.4-mRNA-1	111.88	Macrophage erythroblast attacher isoform 1
maker-pcu_contig_11973-snap-gene-0.0-mRNA-1	9.49645	Serine protease family S10
maker-pcu_contig_1198-snap-gene-0.4-mRNA-1	9.03821	Vertebrate patatin-like phospholipase domain containing 6 (PNPLA6)
maker-pcu_contig_1199-snap-gene-0.1-mRNA-1	52.9144	Pyridoxal-dependent decarboxylase
maker-pcu_contig_1199-snap-gene-0.2-mRNA-1	412.508	Pyridoxal-dependent decarboxylase
maker-pcu_contig_1199-snap-gene-0.3-mRNA-1	19.564	Sporangia induced sperm flagellar protein
maker-pcu_contig_12-fgenesh-gene-0.5-mRNA-1	98.3781	40S ribosomal protein S3-3
maker-pcu_contig_12-snap-gene-0.13-mRNA-1	55.8763	Protein kinase
maker-pcu_contig_12-snap-gene-0.14-mRNA-1	57.7229	Transmembrane protein
maker-pcu_contig_12-snap-gene-0.15-mRNA-1	26.1115	Conserved gene of unknown function
maker-pcu_contig_12-snap-gene-0.18-mRNA-1	24.3173	Mitochondrial Carrier (MC) Family
maker-pcu_contig_12-snap-gene-0.20-mRNA-1	25.1888	Protein kinase
maker-pcu_contig_12-snap-gene-0.22-mRNA-1	14.3252	Endoglucanase
maker-pcu_contig_12-snap-gene-0.23-mRNA-1	14.9979	WD40 repeat-containing protein
maker-pcu_contig_12-snap-gene-0.24-mRNA-1	64.9357	Conserved gene of unknown function
maker-pcu_contig_12-snap-gene-0.25-mRNA-1	8.49645	Pleckstriny domain-containing protein
maker-pcu_contig_12-snap-gene-0.26-mRNA-1	17.3144	Insulin-degrading-like enzyme, metalloprotease family M16A
maker-pcu_contig_12-snap-gene-0.27-mRNA-1	4.84592	Gene of unknown function
maker-pcu_contig_12-snap-gene-0.28-mRNA-1	22.0759	Gene of unknown function
maker-pcu_contig_12-snap-gene-0.29-mRNA-1	19.3395	Vacuolar protein sorting-associated protein
maker-pcu_contig_12-snap-gene-0.30-mRNA-1	77.5954	Adherance factor
maker-pcu_contig_120-snap-gene-0.10-mRNA-1	11.9352	Protein phosphatase methylesterase
maker-pcu_contig_120-snap-gene-0.11-mRNA-1	434.474	Vacuolar protein sorting 29 (Vesicle protein sorting 29)
maker-pcu_contig_120-snap-gene-0.12-mRNA-1	809.334	Gene of unknown function
maker-pcu_contig_120-snap-gene-0.13-mRNA-1	64.0422	YbaK / prolyl-tRNA synthetases associated domain containing protein
maker-pcu_contig_120-snap-gene-0.15-mRNA-1	4.48987	ATP-binding Cassette (ABC) Superfamily
maker-pcu_contig_120-snap-gene-0.17-mRNA-1	13.9352	Tho2 protein
maker-pcu_contig_120-snap-gene-0.18-mRNA-1	172.858	UDP-N-acetylglucosamine transporter
maker-pcu_contig_120-snap-gene-0.19-mRNA-1	28.4269	Gene of unknown function
maker-pcu_contig_120-snap-gene-0.7-mRNA-1	85.0951	Trichohyalin
maker-pcu_contig_120-snap-gene-0.8-mRNA-1	26.6617	Conserved gene of unknown function
maker-pcu_contig_120-snap-gene-0.9-mRNA-1	109.723	WS041
maker-pcu_contig_1200-snap-gene-0.2-mRNA-1	135.124	Protein phosphatase 2C
maker-pcu_contig_12000-snap-gene-0.0-mRNA-1	29.0726	Gene of unknown function
maker-pcu_contig_1201-snap-gene-0.0-mRNA-1	53.2637	Voltage-gated Ion Channel (VIC) Superfamily
maker-pcu_contig_1201-snap-gene-0.1-mRNA-1	30.6899	Voltage-gated Ion Channel (VIC) Superfamily
maker-pcu_contig_1201-snap-gene-0.2-mRNA-1	6.81037	Kinesin K39
maker-pcu_contig_1203-fgenesh-gene-0.2-mRNA-1	23.0404	Phosphoglycerate mutase
maker-pcu_contig_1203-snap-gene-0.4-mRNA-1	16.3559	Conserved gene of unknown function
maker-pcu_contig_1203-snap-gene-0.5-mRNA-1	7.36926	Conserved gene of unknown function
maker-pcu_contig_1204-snap-gene-0.1-mRNA-1	52.5801	50S ribosomal protein L11
maker-pcu_contig_1204-snap-gene-0.2-mRNA-1	4.05793	Conserved gene of unknown function
maker-pcu_contig_1204-snap-gene-0.3-mRNA-1	25.0009	Ribosomal protein S6 kinase
maker-pcu_contig_1204-snap-gene-0.4-mRNA-1	72.7311	Gene of unknown function
maker-pcu_contig_12054-snap-gene-0.0-mRNA-1	4.84917	Cutinase
maker-pcu_contig_12067-snap-gene-0.0-mRNA-1	15.2672	Hect domain-containing protein
maker-pcu_contig_12067-snap-gene-0.1-mRNA-1	169.081	Ras family GTPase
maker-pcu_contig_1207-snap-gene-0.4-mRNA-1	16.1972	Ribosomal RNA methyltransferase
maker-pcu_contig_1207-snap-gene-0.5-mRNA-1	20.5121	Nuclear protein E3-3, isoform a
maker-pcu_contig_1207-snap-gene-0.7-mRNA-1	5.33685	Non-SMC element 1 homolog
maker-pcu_contig_1207-snap-gene-0.8-mRNA-1	356.801	Conserved gene of unknown function
maker-pcu_contig_12074-snap-gene-0.0-mRNA-1	28.5202	Secreted RxLR effector
maker-pcu_contig_1208-snap-gene-0.2-mRNA-1	44.6134	Conserved gene of unknown function
maker-pcu_contig_1208-snap-gene-0.3-mRNA-1	4.94055	Zinc finger protein 183
maker-pcu_contig_1208-snap-gene-0.4-mRNA-1	139.032	Glutaredoxin
maker-pcu_contig_1208-snap-gene-0.5-mRNA-1	125.798	FK506-binding protein 5
maker-pcu_contig_12087-snap-gene-0.1-mRNA-1	7.8194	3-oxoacyl-(Acyl-carrier-protein) reductase
maker-pcu_contig_1209-snap-gene-0.2-mRNA-1	6.04333	Fumarylacetoacetase
maker-pcu_contig_121-fgenesh-gene-0.0-mRNA-1	1192.9	Ribosomal protein L27
maker-pcu_contig_121-fgenesh-gene-0.4-mRNA-1	23.5846	Ufm1-conjugating enzyme 1
maker-pcu_contig_121-snap-gene-0.10-mRNA-1	4.86283	Methyltransferase METT10D
maker-pcu_contig_121-snap-gene-0.11-mRNA-1	5.18131	Regulator of telomere elongation helicase 1 rtel1
maker-pcu_contig_121-snap-gene-0.12-mRNA-1	284.461	Loricrin
maker-pcu_contig_121-snap-gene-0.13-mRNA-1	31.4826	WD40 repeat protein, COMPASS complex protein
maker-pcu_contig_121-snap-gene-0.14-mRNA-1	19.7138	Conserved gene of unknown function
maker-pcu_contig_121-snap-gene-0.15-mRNA-1	5.84808	Protein kinase
maker-pcu_contig_121-snap-gene-0.16-mRNA-1	5.45985	Tetratricopeptide repeat protein
maker-pcu_contig_121-snap-gene-0.5-mRNA-1	28.3629	NLRC3 receptor
maker-pcu_contig_121-snap-gene-0.6-mRNA-1	24.185	Zinc finger, C2H2 type family protein
maker-pcu_contig_121-snap-gene-0.8-mRNA-1	17.0087	Conserved gene of unknown function
maker-pcu_contig_121-snap-gene-0.9-mRNA-1	4.36088	Cell division cycle protein 48
maker-pcu_contig_12103-snap-gene-0.1-mRNA-1	191.164	SUMO-activating enzyme (SAE)
maker-pcu_contig_1211-fgenesh-gene-0.0-mRNA-1	38.8828	GRIP1-associated protein
maker-pcu_contig_1211-snap-gene-0.2-mRNA-1	15.5263	Phosphatidate cytidylyltransferase
maker-pcu_contig_1211-snap-gene-0.3-mRNA-1	88.8072	DJ-1
maker-pcu_contig_1211-snap-gene-0.5-mRNA-1	33.3213	4-methyl-5(B-hydroxyethyl)-thiazol monophosphate biosynthesis enzyme
maker-pcu_contig_12114-snap-gene-0.1-mRNA-1	7.38471	Conserved gene of unknown function
maker-pcu_contig_1212-snap-gene-0.2-mRNA-1	14.5065	Liver stage antigen
maker-pcu_contig_1212-snap-gene-0.3-mRNA-1	104.188	Conserved gene of unknown function
maker-pcu_contig_1213-snap-gene-0.2-mRNA-1	20.2851	CCT motif containing protein
maker-pcu_contig_1213-snap-gene-0.3-mRNA-1	9.5381	Conserved gene of unknown function
maker-pcu_contig_12131-snap-gene-0.1-mRNA-1	5.15491	Beta-glucan synthesis-associated protein
maker-pcu_contig_12138-fgenesh-gene-0.0-mRNA-1	15.9334	GG19876
maker-pcu_contig_12156-snap-gene-0.0-mRNA-1	30.4926	Conserved gene of unknown function
maker-pcu_contig_1216-snap-gene-0.3-mRNA-1	23.2378	Conserved gene of unknown function
maker-pcu_contig_1216-snap-gene-0.5-mRNA-1	124.944	Guanine deaminase
maker-pcu_contig_12166-snap-gene-0.0-mRNA-1	4.27742	Protein transporter Sec31A
maker-pcu_contig_1217-snap-gene-0.1-mRNA-1	6.25396	WD repeat protein 24.
maker-pcu_contig_12177-snap-gene-0.0-mRNA-1	100.742	Crinkler (CRN) domain-containing protein
maker-pcu_contig_1218-snap-gene-0.3-mRNA-1	58.3751	Conserved gene of unknown function
maker-pcu_contig_1218-snap-gene-0.5-mRNA-1	57.5141	Protein kinase
maker-pcu_contig_1218-snap-gene-0.7-mRNA-1	55.9059	Conserved gene of unknown function
maker-pcu_contig_1219-snap-gene-0.2-mRNA-1	56.0729	Transmembrane protein
maker-pcu_contig_1219-snap-gene-0.3-mRNA-1	40.0755	Gene of unknown function
maker-pcu_contig_1219-snap-gene-0.5-mRNA-1	44.9422	Conserved gene of unknown function
maker-pcu_contig_122-fgenesh-gene-0.3-mRNA-1	19.5875	Splicing factor 3B subunit 1
maker-pcu_contig_122-snap-gene-0.10-mRNA-1	21.7771	SH2 domain containing protein
maker-pcu_contig_122-snap-gene-0.13-mRNA-1	9.40683	Serine protease family S01A
maker-pcu_contig_122-snap-gene-0.7-mRNA-1	26.6533	Serine protease family S01A
maker-pcu_contig_12202-snap-gene-0.0-mRNA-1	23.8349	NPP1
maker-pcu_contig_1221-fgenesh-gene-0.3-mRNA-1	8583.62	60S ribosomal protein L10
maker-pcu_contig_1221-snap-gene-0.4-mRNA-1	15.5802	Hypothetical leucine rich repeat protein
maker-pcu_contig_1221-snap-gene-0.6-mRNA-1	69.0676	Endoplasmic reticulum-Golgi intermediate compartment protein
maker-pcu_contig_1221-snap-gene-0.8-mRNA-1	15.9734	Conserved gene of unknown function
maker-pcu_contig_12212-snap-gene-0.1-mRNA-1	605.593	Cell 12A endoglucanase
maker-pcu_contig_12223-fgenesh-gene-0.0-mRNA-1	2578.51	SCP-like extracellular protein
maker-pcu_contig_1226-snap-gene-0.4-mRNA-1	83.5847	Solute:Sodium Symporter (SSS) Family
maker-pcu_contig_1227-fgenesh-gene-0.0-mRNA-1	641.266	HSF-type DNA-binding
maker-pcu_contig_1227-snap-gene-0.4-mRNA-1	45.7635	Kaptin (Actin binding protein)
maker-pcu_contig_1227-snap-gene-0.6-mRNA-1	102.649	Conserved gene of unknown function
maker-pcu_contig_1229-fgenesh-gene-0.1-mRNA-1	17.8213	RRNA-processing protein
maker-pcu_contig_1229-snap-gene-0.3-mRNA-1	25.1974	Conserved gene of unknown function
maker-pcu_contig_1229-snap-gene-0.5-mRNA-1	17.6899	Conserved gene of unknown function
maker-pcu_contig_1229-snap-gene-0.6-mRNA-1	8.1512	Pre-mRNA-processing factor 39
maker-pcu_contig_1229-snap-gene-0.7-mRNA-1	4.67973	Pre-mRNA-processing factor 39
maker-pcu_contig_123-fgenesh-gene-0.1-mRNA-1	7.38858	Adenosylhomocysteinase
maker-pcu_contig_123-fgenesh-gene-0.3-mRNA-1	637.201	Conserved gene of unknown function
maker-pcu_contig_123-fgenesh-gene-0.6-mRNA-1	2112.72	Ribosomal protein L29
maker-pcu_contig_123-snap-gene-0.10-mRNA-1	77.3601	THUMP domain containing 1
maker-pcu_contig_123-snap-gene-0.12-mRNA-1	360.071	Exoglucanase 1
maker-pcu_contig_123-snap-gene-0.13-mRNA-1	6.86521	Acyl-CoA desaturase
maker-pcu_contig_123-snap-gene-0.14-mRNA-1	24.7492	Conserved gene of unknown function
maker-pcu_contig_123-snap-gene-0.15-mRNA-1	11.6568	Necrosis-inducing
maker-pcu_contig_123-snap-gene-0.16-mRNA-1	19.1736	N-acetyltransferase
maker-pcu_contig_123-snap-gene-0.17-mRNA-1	736.076	Conserved gene of unknown function
maker-pcu_contig_123-snap-gene-0.18-mRNA-1	74.4508	WD domain-containing protein
maker-pcu_contig_123-snap-gene-0.20-mRNA-1	36.5234	Conserved gene of unknown function
maker-pcu_contig_123-snap-gene-0.8-mRNA-1	17.9938	NPP1
maker-pcu_contig_1230-snap-gene-0.1-mRNA-1	10.5063	Voltage-gated Ion Channel (VIC) Superfamily
maker-pcu_contig_1230-snap-gene-0.2-mRNA-1	44.4075	Voltage-gated Ion Channel (VIC) Superfamily
maker-pcu_contig_1230-snap-gene-0.3-mRNA-1	6.94817	Vertebrate centaurin, beta 2 (CENTB2)
maker-pcu_contig_1230-snap-gene-0.4-mRNA-1	10.6481	Brix domain-containing protein 2
maker-pcu_contig_12303-snap-gene-0.0-mRNA-1	26.739	NPP1
maker-pcu_contig_12308-snap-gene-0.0-mRNA-1	51.693	CHY zinc finger domain-containing protein
maker-pcu_contig_12326-snap-gene-0.0-mRNA-1	98.8991	Inositol-3,4-bisphosphate 4-phosphatase
maker-pcu_contig_1233-snap-gene-0.2-mRNA-1	6.06564	Conserved gene of unknown function
maker-pcu_contig_1235-snap-gene-0.1-mRNA-1	72.668	Phospholipase D, Pi-PXTM-PLD
maker-pcu_contig_12359-snap-gene-0.1-mRNA-1	20.0736	Histone-binding protein RBBP7
maker-pcu_contig_1236-snap-gene-0.1-mRNA-1	13.277	Conserved gene of unknown function
maker-pcu_contig_1236-snap-gene-0.2-mRNA-1	78.4725	RabGAP
maker-pcu_contig_1236-snap-gene-0.3-mRNA-1	74.7188	GJ20109
maker-pcu_contig_1236-snap-gene-0.4-mRNA-1	159.749	Conserved gene of unknown function
maker-pcu_contig_1236-snap-gene-0.5-mRNA-1	5.46636	GM15668
maker-pcu_contig_1237-fgenesh-gene-0.1-mRNA-1	5.74218	Conserved gene of unknown function
maker-pcu_contig_1237-snap-gene-0.2-mRNA-1	23.0812	Conserved gene of unknown function
maker-pcu_contig_1237-snap-gene-0.4-mRNA-1	5.78113	RP11-244N9.5
maker-pcu_contig_12373-snap-gene-0.1-mRNA-1	31.3481	Katanin p60 ATPase-containing subunit
maker-pcu_contig_1238-fgenesh-gene-0.0-mRNA-1	389.878	Gene of unknown function
maker-pcu_contig_1238-snap-gene-0.6-mRNA-1	7.43898	Sec1 family domain containing 2
maker-pcu_contig_12392-snap-gene-0.0-mRNA-1	9.50313	Transmembrane protein
maker-pcu_contig_124-snap-gene-0.10-mRNA-1	67.6114	Rab28 family GTPase
maker-pcu_contig_124-snap-gene-0.11-mRNA-1	42.6969	Conserved gene of unknown function
maker-pcu_contig_124-snap-gene-0.16-mRNA-1	15.5483	Multidrug/Oligosaccharidyl-lipid/Polysaccharide (MOP) Flippase Superfamily
maker-pcu_contig_124-snap-gene-0.18-mRNA-1	9.42498	Conserved gene of unknown function
maker-pcu_contig_124-snap-gene-0.19-mRNA-1	25.2466	ATP-binding Cassette (ABC) Superfamily
maker-pcu_contig_124-snap-gene-0.20-mRNA-1	4.46775	ATP-binding Cassette (ABC) Superfamily
maker-pcu_contig_124-snap-gene-0.22-mRNA-1	34.4403	Abnormal X segregation
maker-pcu_contig_124-snap-gene-0.23-mRNA-1	19.6225	COX19 homolog, cytochrome c oxidase assembly protein
maker-pcu_contig_124-snap-gene-0.24-mRNA-1	30.1449	Sphingomyelin synthetase
maker-pcu_contig_124-snap-gene-0.25-mRNA-1	5.38638	Conserved gene of unknown function
maker-pcu_contig_124-snap-gene-0.9-mRNA-1	26.1139	CDS Pa_6_4820
maker-pcu_contig_12403-snap-gene-0.0-mRNA-1	64.1474	Conserved gene of unknown function
maker-pcu_contig_12435-snap-gene-0.0-mRNA-1	7.79368	Folate-Biopterin Transporter (FBT) Family
maker-pcu_contig_1245-snap-gene-0.4-mRNA-1	12.1121	Conserved gene of unknown function
maker-pcu_contig_1245-snap-gene-0.6-mRNA-1	8.65999	Myb-like DNA-binding protein
maker-pcu_contig_1246-fgenesh-gene-0.1-mRNA-1	156.43	Liver stage antigen
maker-pcu_contig_1246-snap-gene-0.2-mRNA-1	9.46137	GF12385
maker-pcu_contig_1246-snap-gene-0.3-mRNA-1	36.0759	Conserved gene of unknown function
maker-pcu_contig_1247-snap-gene-0.3-mRNA-1	22.2141	Phenylalanine-4-hydroxylase, henna
maker-pcu_contig_1247-snap-gene-0.4-mRNA-1	28.8675	Serine protease family S10
maker-pcu_contig_1247-snap-gene-0.6-mRNA-1	19.6353	UV excision repair protein RAD23
maker-pcu_contig_1248-snap-gene-0.0-mRNA-1	41.4014	Zinc finger protein 2
maker-pcu_contig_1249-snap-gene-0.2-mRNA-1	31.1554	Ankyrin
maker-pcu_contig_1249-snap-gene-0.5-mRNA-1	18.6993	DnaJ domain-containing protein
maker-pcu_contig_12491-snap-gene-0.1-mRNA-1	5.87136	Propionate-CoA ligase protein
maker-pcu_contig_125-snap-gene-0.11-mRNA-1	36.0828	Conserved gene of unknown function
maker-pcu_contig_125-snap-gene-0.13-mRNA-1	4.22083	Serine protease family S09A
maker-pcu_contig_125-snap-gene-0.4-mRNA-1	12.6928	Protein kinase
maker-pcu_contig_125-snap-gene-0.6-mRNA-1	28.0126	Conserved gene of unknown function
maker-pcu_contig_125-snap-gene-0.7-mRNA-1	29.5936	N-carbamoylputrescine amidase
maker-pcu_contig_1250-fgenesh-gene-0.2-mRNA-1	60.1757	C-Myc-binding protein
maker-pcu_contig_1250-snap-gene-0.3-mRNA-1	10.4948	Glutathione S-transferase
maker-pcu_contig_1250-snap-gene-0.4-mRNA-1	239.777	Gene of unknown function
maker-pcu_contig_1251-snap-gene-0.2-mRNA-1	31.1272	Bile-salt-activated lipase precursor
maker-pcu_contig_1251-snap-gene-0.4-mRNA-1	17.0112	Gene of unknown function
maker-pcu_contig_1251-snap-gene-0.6-mRNA-1	433.012	Myb-like DNA-binding protein
maker-pcu_contig_12518-snap-gene-0.0-mRNA-1	25.8029	Pleiotropic drug resistance transporter
maker-pcu_contig_1252-snap-gene-0.2-mRNA-1	621.118	Transmembrane protein
maker-pcu_contig_1252-snap-gene-0.3-mRNA-1	93.4026	Transmembrane protein
maker-pcu_contig_1252-snap-gene-0.4-mRNA-1	611.652	ATP-binding Cassette (ABC) Superfamily
maker-pcu_contig_1253-fgenesh-gene-0.0-mRNA-1	27.689	Sugar transporter
maker-pcu_contig_1253-fgenesh-gene-0.2-mRNA-1	28.2533	Endoplasmic reticulum membrane protein YGL010W
maker-pcu_contig_1253-snap-gene-0.4-mRNA-1	4.03428	Conserved gene of unknown function
maker-pcu_contig_1253-snap-gene-0.5-mRNA-1	7.07513	Transmembrane protein
maker-pcu_contig_12536-snap-gene-0.0-mRNA-1	165.113	Carbonic anhydrase
maker-pcu_contig_12542-snap-gene-0.0-mRNA-1	19.7825	YALI0F12199p
maker-pcu_contig_1257-snap-gene-0.3-mRNA-1	27.0622	Conserved gene of unknown function
maker-pcu_contig_1257-snap-gene-0.4-mRNA-1	51.2114	Conserved gene of unknown function
maker-pcu_contig_1257-snap-gene-0.5-mRNA-1	35.442	Conserved gene of unknown function
maker-pcu_contig_12575-snap-gene-0.0-mRNA-1	8.04097	Conserved gene of unknown function
maker-pcu_contig_12588-snap-gene-0.1-mRNA-1	177.897	Calcineurin-like phosphoesterase
maker-pcu_contig_126-fgenesh-gene-0.1-mRNA-1	276.867	Microtubule-associated protein EB1
maker-pcu_contig_126-fgenesh-gene-0.3-mRNA-1	48.298	Phosducin
maker-pcu_contig_126-fgenesh-gene-0.5-mRNA-1	32.4899	Conserved hypothetical protein
maker-pcu_contig_126-fgenesh-gene-0.7-mRNA-1	39.2587	5'-AMP-activated protein kinase subunit beta
maker-pcu_contig_126-snap-gene-0.14-mRNA-1	8.05568	Pinin
maker-pcu_contig_126-snap-gene-0.15-mRNA-1	58.2812	UPF0197 transmembrane protein
maker-pcu_contig_126-snap-gene-0.19-mRNA-1	59.8152	U6 snRNA-associated Sm
maker-pcu_contig_126-snap-gene-0.23-mRNA-1	100.171	Conserved gene of unknown function
maker-pcu_contig_126-snap-gene-0.24-mRNA-1	4.28698	Gene of unknown function
maker-pcu_contig_126-snap-gene-0.25-mRNA-1	20.1268	Tyrosine-protein phosphatase OCA1
maker-pcu_contig_126-snap-gene-0.27-mRNA-1	17.3016	Minichromosome loss protein 1
maker-pcu_contig_126-snap-gene-0.28-mRNA-1	5.10481	Glutamyl-tRNA(Gln) amidotransferase, C subunit
maker-pcu_contig_126-snap-gene-0.31-mRNA-1	7.17979	Conserved gene of unknown function
maker-pcu_contig_126-snap-gene-0.32-mRNA-1	2148.37	Conserved gene of unknown function
maker-pcu_contig_1260-snap-gene-0.2-mRNA-1	626.269	Signal peptidase complex subunit 3
maker-pcu_contig_1260-snap-gene-0.3-mRNA-1	140.22	Heat shock protein 40/ DnaJ domain containing protein
maker-pcu_contig_1260-snap-gene-0.4-mRNA-1	41.5145	Phosphatidylinositide phosphatase SAC1
maker-pcu_contig_1260-snap-gene-0.5-mRNA-1	32.1498	Phosphatidylinositide phosphatase SAC1
maker-pcu_contig_1260-snap-gene-0.6-mRNA-1	26.8222	Phosphatidylinositide phosphatase SAC1
maker-pcu_contig_1261-fgenesh-gene-0.0-mRNA-1	12081.6	Calreticulin
maker-pcu_contig_1261-snap-gene-0.3-mRNA-1	22.4287	Transmembrane protein
maker-pcu_contig_1261-snap-gene-0.4-mRNA-1	30.4111	GK003
maker-pcu_contig_1264-snap-gene-0.1-mRNA-1	6.93739	Chromodomain protein
maker-pcu_contig_12641-snap-gene-0.0-mRNA-1	24.3647	Methylcrotonoyl-CoA carboxylase beta chain, mitochondrial
maker-pcu_contig_12646-snap-gene-0.1-mRNA-1	137.154	Protein RER1A
maker-pcu_contig_1265-snap-gene-0.1-mRNA-1	14.4419	Ubiquitin carboxyl-terminal hydrolase
maker-pcu_contig_1265-snap-gene-0.2-mRNA-1	110.605	Ubiquitin carboxyl-terminal hydrolase
maker-pcu_contig_1266-fgenesh-gene-0.0-mRNA-1	28.104	Ribosomal RNA processing protein 1
maker-pcu_contig_1266-snap-gene-0.1-mRNA-1	19.2244	Growth hormone regulated TBC protein 1
maker-pcu_contig_1267-snap-gene-0.6-mRNA-1	16.7495	Gene of unknown function
maker-pcu_contig_1267-snap-gene-0.7-mRNA-1	32.8492	30S ribosomal protein S18
maker-pcu_contig_1267-snap-gene-0.8-mRNA-1	811.931	Protein phosphatase 2A regulatory B subunit
maker-pcu_contig_1268-snap-gene-0.1-mRNA-1	144.376	Phospholipid-transporting ATPase
maker-pcu_contig_1268-snap-gene-0.2-mRNA-1	261.947	Conserved gene of unknown function
maker-pcu_contig_1268-snap-gene-0.3-mRNA-1	102.14	GH18277
maker-pcu_contig_12688-snap-gene-0.0-mRNA-1	8.57492	Conserved gene of unknown function
maker-pcu_contig_1269-snap-gene-0.2-mRNA-1	6.44206	RXLR effector family
maker-pcu_contig_1269-snap-gene-0.3-mRNA-1	33.5087	Methylmalonate semialdehyde dehydrogenase [acylating]
maker-pcu_contig_1269-snap-gene-0.4-mRNA-1	15.3811	Conserved gene of unknown function
maker-pcu_contig_1269-snap-gene-0.5-mRNA-1	5.29599	Actin
maker-pcu_contig_1269-snap-gene-0.6-mRNA-1	6.95755	Conserved gene of unknown function
maker-pcu_contig_12696-snap-gene-0.0-mRNA-1	4.62801	2-oxoglutarate dehydrogenase
maker-pcu_contig_127-fgenesh-gene-0.0-mRNA-1	3923.92	PH (Pleckstrin homology) domain-containing protein
maker-pcu_contig_127-fgenesh-gene-0.1-mRNA-1	189.701	Conserved gene of unknown function
maker-pcu_contig_127-fgenesh-gene-0.5-mRNA-1	19.1979	Serine hydroxymethyltransferase
maker-pcu_contig_127-snap-gene-0.12-mRNA-1	116.765	E2F-like repressor E2L2
maker-pcu_contig_127-snap-gene-0.14-mRNA-1	162.76	Callose synthase
maker-pcu_contig_127-snap-gene-0.19-mRNA-1	186.033	Conserved gene of unknown function
maker-pcu_contig_1270-snap-gene-0.3-mRNA-1	5.21529	TPR repeat protein
maker-pcu_contig_12701-snap-gene-0.0-mRNA-1	11.0415	Crinkler (CRN) family protein
maker-pcu_contig_1271-fgenesh-gene-0.2-mRNA-1	119.751	Conserved gene of unknown function
maker-pcu_contig_1271-snap-gene-0.4-mRNA-1	605.996	Maleylacetoacetate isomerase
maker-pcu_contig_1271-snap-gene-0.7-mRNA-1	38.3041	Conserved gene of unknown function
maker-pcu_contig_1271-snap-gene-0.8-mRNA-1	9.79232	Protein FAM116 homolog
maker-pcu_contig_12714-snap-gene-0.1-mRNA-1	27.3947	Cyclin-dependent kinase
maker-pcu_contig_1272-fgenesh-gene-0.0-mRNA-1	9.65175	Peptide deformylase
maker-pcu_contig_1272-snap-gene-0.3-mRNA-1	5.40716	Serine protease family S01A
maker-pcu_contig_1272-snap-gene-0.6-mRNA-1	6.53706	Conserved gene of unknown function
maker-pcu_contig_1272-snap-gene-0.7-mRNA-1	458.116	Tubby
maker-pcu_contig_12725-snap-gene-0.0-mRNA-1	42.054	Conserved gene of unknown function
maker-pcu_contig_1273-snap-gene-0.1-mRNA-1	7.17031	Incenp
maker-pcu_contig_1273-snap-gene-0.2-mRNA-1	113.349	Myosin
maker-pcu_contig_1273-snap-gene-0.3-mRNA-1	56.6212	HIU hydrolase
maker-pcu_contig_12733-snap-gene-0.0-mRNA-1	6.93191	Gene of unknown function
maker-pcu_contig_1274-fgenesh-gene-0.2-mRNA-1	55.2268	Nucleolar complex protein 3
maker-pcu_contig_1274-snap-gene-0.3-mRNA-1	179.164	Conserved gene of unknown function
maker-pcu_contig_1274-snap-gene-0.4-mRNA-1	27.5731	Protein FAM164B
maker-pcu_contig_1274-snap-gene-0.5-mRNA-1	726.481	Chromatin remodeling complex subunit
maker-pcu_contig_12756-fgenesh-gene-0.0-mRNA-1	30.3059	Gene of unknown function
maker-pcu_contig_12768-snap-gene-0.0-mRNA-1	11.1321	Conserved gene of unknown function
maker-pcu_contig_1277-snap-gene-0.2-mRNA-1	7.26381	Protein TSSC1
maker-pcu_contig_12771-snap-gene-0.1-mRNA-1	52.4609	Conserved gene of unknown function
maker-pcu_contig_12774-snap-gene-0.0-mRNA-1	11.1047	Crinkler (CRN) family protein
maker-pcu_contig_12779-snap-gene-0.1-mRNA-1	16.7392	AP-1 complex subunit beta
maker-pcu_contig_12791-snap-gene-0.1-mRNA-1	163.965	Rab3 GTPase-activating protein catalytic subunit
maker-pcu_contig_12795-snap-gene-0.1-mRNA-1	18.4356	6-phosphogluconolactonase
maker-pcu_contig_128-snap-gene-0.10-mRNA-1	11.2223	Endo-1,3(4)-beta-glucanase
maker-pcu_contig_128-snap-gene-0.15-mRNA-1	1127.39	Conserved gene of unknown function
maker-pcu_contig_128-snap-gene-0.16-mRNA-1	31.0349	Ankyrin domain protein ank2
maker-pcu_contig_128-snap-gene-0.17-mRNA-1	19.1376	Conserved gene of unknown function
maker-pcu_contig_128-snap-gene-0.18-mRNA-1	6.73483	Myosin
maker-pcu_contig_128-snap-gene-0.6-mRNA-1	4.14478	Microtubule-associated protein
maker-pcu_contig_128-snap-gene-0.9-mRNA-1	13.3028	DNA2-like helicase
maker-pcu_contig_1281-snap-gene-0.2-mRNA-1	414.512	Conserved gene of unknown function
maker-pcu_contig_12815-snap-gene-0.0-mRNA-1	34.607	Sterol 3-beta-glucosyltransferase
maker-pcu_contig_12840-snap-gene-0.1-mRNA-1	178.681	Ubiquitin-conjugating enzyme E2
maker-pcu_contig_12840-snap-gene-0.2-mRNA-1	60.5896	Ubiquitin carrier protein
maker-pcu_contig_12843-snap-gene-0.0-mRNA-1	7.40098	Cstf-64-prov protein
maker-pcu_contig_1285-snap-gene-0.3-mRNA-1	156.131	40S ribosomal protein S4
maker-pcu_contig_1285-snap-gene-0.4-mRNA-1	14.4615	Phosphatidylinositol-4-phosphate-5-kinase (PIPK-D6/GPCR-PIPK)
maker-pcu_contig_12858-snap-gene-0.1-mRNA-1	440.807	Endo-1,3(4)-beta-glucanase
maker-pcu_contig_1286-snap-gene-0.6-mRNA-1	23.244	4-methyl-5(B-hydroxyethyl)-thiazole monophosphate biosynthesis protein
maker-pcu_contig_1286-snap-gene-0.7-mRNA-1	15.8213	Sporangia induced predicted protein
maker-pcu_contig_1286-snap-gene-0.8-mRNA-1	51.2496	Copine
maker-pcu_contig_12889-snap-gene-0.0-mRNA-1	24.444	Secreted RxLR effector peptide protein
maker-pcu_contig_1289-snap-gene-0.1-mRNA-1	22.7625	Gene of unknown function
maker-pcu_contig_1289-snap-gene-0.2-mRNA-1	81.8973	Gene of unknown function
maker-pcu_contig_1289-snap-gene-0.3-mRNA-1	107.461	Protein TRS85 homolog
maker-pcu_contig_129-fgenesh-gene-0.4-mRNA-1	30.1048	Mitochondrial import receptor subunit TOM70
maker-pcu_contig_129-fgenesh-gene-0.5-mRNA-1	4.05722	Arginine N-methyltransferase
maker-pcu_contig_129-fgenesh-gene-0.7-mRNA-1	8.95327	13 kDa ribonucleoprotein-associated protein
maker-pcu_contig_129-snap-gene-0.10-mRNA-1	12.013	Methionine aminopeptidase
maker-pcu_contig_129-snap-gene-0.11-mRNA-1	5.71505	Conserved gene of unknown function
maker-pcu_contig_129-snap-gene-0.12-mRNA-1	7.50969	Conserved gene of unknown function
maker-pcu_contig_129-snap-gene-0.18-mRNA-1	24.063	Geranylgeranyl transferase type-1 subunit beta
maker-pcu_contig_129-snap-gene-0.8-mRNA-1	30.7986	Conserved gene of unknown function
maker-pcu_contig_129-snap-gene-0.9-mRNA-1	189.997	Transmembrane protein
maker-pcu_contig_1290-fgenesh-gene-0.1-mRNA-1	58.0748	AP-2 complex subunit alpha
maker-pcu_contig_12900-snap-gene-0.0-mRNA-1	69.1136	Crinkler (CRN) family protein
maker-pcu_contig_12900-snap-gene-0.1-mRNA-1	9.2578	Carbohydrate-binding protein
maker-pcu_contig_1291-snap-gene-0.2-mRNA-1	23.6074	MGC79653 protein, partial
maker-pcu_contig_1291-snap-gene-0.3-mRNA-1	121.094	Gene of unknown function
maker-pcu_contig_1292-fgenesh-gene-0.2-mRNA-1	166.76	Conserved gene of unknown function
maker-pcu_contig_1292-snap-gene-0.3-mRNA-1	14.6125	Beta-secretase
maker-pcu_contig_1292-snap-gene-0.5-mRNA-1	6.38427	CwfJ-like family protein / zinc finger (CCCH-type) family protein
maker-pcu_contig_1292-snap-gene-0.6-mRNA-1	9.65456	Conserved gene of unknown function
maker-pcu_contig_1294-snap-gene-0.2-mRNA-1	71.7904	Double-strand-break repair protein rad21
maker-pcu_contig_1294-snap-gene-0.3-mRNA-1	26.2852	Double-strand-break repair protein rad21
maker-pcu_contig_1294-snap-gene-0.4-mRNA-1	61.1785	EF hand family protein
maker-pcu_contig_1294-snap-gene-0.5-mRNA-1	681.656	GTP cyclohydrolase I
maker-pcu_contig_12954-snap-gene-0.1-mRNA-1	279.342	Transporter
maker-pcu_contig_12957-snap-gene-0.0-mRNA-1	44.7423	Flagellar outer dynein arm-docking complex protein 1
maker-pcu_contig_1296-fgenesh-gene-0.0-mRNA-1	257.874	Conserved gene of unknown function
maker-pcu_contig_1296-fgenesh-gene-0.1-mRNA-1	9.81528	Phosphoglucomutase
maker-pcu_contig_1296-snap-gene-0.2-mRNA-1	12.6642	CFZ1
maker-pcu_contig_1296-snap-gene-0.3-mRNA-1	23.7115	Breast carcinoma amplified sequence
maker-pcu_contig_1298-fgenesh-gene-0.1-mRNA-1	250.888	Conserved gene of unknown function
maker-pcu_contig_1298-snap-gene-0.2-mRNA-1	348.586	L-aspartate oxidase
maker-pcu_contig_12997-snap-gene-0.0-mRNA-1	12.4355	Secreted RxLR effector peptide protein
maker-pcu_contig_13-fgenesh-gene-0.6-mRNA-1	21.2199	Fumarate hydratase, mitochondrial
maker-pcu_contig_13-snap-gene-0.19-mRNA-1	27.5331	Conserved gene of unknown function
maker-pcu_contig_13-snap-gene-0.20-mRNA-1	47.0191	Similar to myosin VIIA (LOC424751)
maker-pcu_contig_13-snap-gene-0.24-mRNA-1	8.19291	Protein pns1
maker-pcu_contig_13-snap-gene-0.25-mRNA-1	53.603	Conserved gene of unknown function
maker-pcu_contig_13-snap-gene-0.26-mRNA-1	4.63845	Possible ribosome assembly protein 4
maker-pcu_contig_13-snap-gene-0.27-mRNA-1	23.5755	Protein H39E23.3, partially confirmed by transcript evidence
maker-pcu_contig_13-snap-gene-0.34-mRNA-1	14.9432	Conserved gene of unknown function
maker-pcu_contig_13-snap-gene-0.36-mRNA-1	8.5692	GK14696
maker-pcu_contig_13-snap-gene-0.37-mRNA-1	178.078	ADP-ribosylation factor family
maker-pcu_contig_13-snap-gene-0.38-mRNA-1	5.61707	F-box/LRR-repeat protein 20 (F-box and leucine-rich repeat protein 20)
maker-pcu_contig_13-snap-gene-0.41-mRNA-1	8.40879	Gene of unknown function
maker-pcu_contig_130-fgenesh-gene-0.1-mRNA-1	40.9166	5-methlytetrahydropteroyltriglutamate-homocysteine methyltransferease
maker-pcu_contig_130-fgenesh-gene-0.2-mRNA-1	30.5949	(Fragment)
maker-pcu_contig_130-fgenesh-gene-0.3-mRNA-1	654.931	60S ribosomal protein L30
maker-pcu_contig_130-fgenesh-gene-0.6-mRNA-1	37.2787	Conserved gene of unknown function
maker-pcu_contig_130-snap-gene-0.11-mRNA-1	29.8045	Protein of unknown function DUF1637 family protein
maker-pcu_contig_130-snap-gene-0.12-mRNA-1	4.9414	Conserved gene of unknown function
maker-pcu_contig_130-snap-gene-0.7-mRNA-1	23.6641	Tubulin binding cofactor C
maker-pcu_contig_1300-fgenesh-gene-0.1-mRNA-1	71.6642	Conserved gene of unknown function
maker-pcu_contig_13008-snap-gene-0.0-mRNA-1	194.27	Sig3
maker-pcu_contig_1301-snap-gene-0.2-mRNA-1	72.3483	Kinesin
maker-pcu_contig_13011-snap-gene-0.0-mRNA-1	376.207	Alpha-tubulin
maker-pcu_contig_13014-snap-gene-0.0-mRNA-1	5.48818	U11/U12 small nuclear ribonucleoprotein 35 kDa protein
maker-pcu_contig_1302-snap-gene-0.3-mRNA-1	7.25518	Transmembrane protein
maker-pcu_contig_1302-snap-gene-0.4-mRNA-1	29.7373	Conserved gene of unknown function
maker-pcu_contig_1302-snap-gene-0.5-mRNA-1	5.44359	Uridine phosphorylase
maker-pcu_contig_1302-snap-gene-0.7-mRNA-1	170.021	F-box protein
maker-pcu_contig_1303-snap-gene-0.3-mRNA-1	9.96844	Ferredoxin-dependent glutamate synthase
maker-pcu_contig_13033-snap-gene-0.1-mRNA-1	66.3437	Conserved gene of unknown function
maker-pcu_contig_13037-snap-gene-0.0-mRNA-1	41.2426	Conserved gene of unknown function
maker-pcu_contig_13053-snap-gene-0.1-mRNA-1	5584.93	Glycoside hydrolase
maker-pcu_contig_13059-snap-gene-0.1-mRNA-1	51.4193	Translation initiation factor IF-2
maker-pcu_contig_1306-snap-gene-0.3-mRNA-1	75.5676	Transcription factor
maker-pcu_contig_1306-snap-gene-0.5-mRNA-1	12.4493	Dihydrolipoamide succinyltransferase
maker-pcu_contig_13061-snap-gene-0.0-mRNA-1	15.4466	Loricrin
maker-pcu_contig_13074-snap-gene-0.0-mRNA-1	18.5156	Viral protein TPX
maker-pcu_contig_131-fgenesh-gene-0.5-mRNA-1	25.4969	ARP2/3 complex 20 kDa subunit
maker-pcu_contig_131-fgenesh-gene-0.6-mRNA-1	8.41894	Elongation factor Ts
maker-pcu_contig_131-snap-gene-0.11-mRNA-1	3.74601	Conserved gene of unknown function
maker-pcu_contig_131-snap-gene-0.12-mRNA-1	14.1392	Heme/Steroid binding domain
maker-pcu_contig_131-snap-gene-0.14-mRNA-1	93.4732	Endonuclease/exonuclease/phosphatase family protein
maker-pcu_contig_131-snap-gene-0.17-mRNA-1	43.3786	Ubiquitin carboxyl-terminal hydrolase
maker-pcu_contig_131-snap-gene-0.18-mRNA-1	11.4299	GAF domain-containing protein
maker-pcu_contig_1310-snap-gene-0.4-mRNA-1	44.157	Conserved gene of unknown function
maker-pcu_contig_1311-snap-gene-0.4-mRNA-1	13.4921	Conserved gene of unknown function
maker-pcu_contig_1312-snap-gene-0.1-mRNA-1	196.057	Sulfatase
maker-pcu_contig_1312-snap-gene-0.3-mRNA-1	50.3021	Conserved gene of unknown function
maker-pcu_contig_13125-snap-gene-0.0-mRNA-1	105.778	Conserved gene of unknown function
maker-pcu_contig_1313-fgenesh-gene-0.0-mRNA-1	12.8598	RWP-RK domain-containing protein
maker-pcu_contig_1313-snap-gene-0.2-mRNA-1	243.655	Conserved gene of unknown function
maker-pcu_contig_1313-snap-gene-0.4-mRNA-1	105.542	Sentrin/sumo-specific protease
maker-pcu_contig_1313-snap-gene-0.5-mRNA-1	32.0963	Conserved gene of unknown function
maker-pcu_contig_1316-snap-gene-0.1-mRNA-1	4.25525	Kinesin K39
maker-pcu_contig_1316-snap-gene-0.2-mRNA-1	17.2952	Protein BIM1
maker-pcu_contig_1317-snap-gene-0.1-mRNA-1	54.7487	Coiled-coil domain containing 18, partial
maker-pcu_contig_13172-snap-gene-0.1-mRNA-1	1353.34	Conserved gene of unknown function
maker-pcu_contig_13175-snap-gene-0.1-mRNA-1	105.8	Dynactin subunit 5
maker-pcu_contig_132-fgenesh-gene-0.1-mRNA-1	128.021	Sporangia induced deflagellation-inducible protein
maker-pcu_contig_132-fgenesh-gene-0.2-mRNA-1	48.2316	Lactoylglutathione lyase
maker-pcu_contig_132-snap-gene-0.11-mRNA-1	7.20475	Conserved gene of unknown function
maker-pcu_contig_132-snap-gene-0.15-mRNA-1	21.022	Conserved gene of unknown function
maker-pcu_contig_132-snap-gene-0.17-mRNA-1	7.47209	HCG2011153
maker-pcu_contig_132-snap-gene-0.19-mRNA-1	4.63942	Nuclear receptor subfamily 1, group H, member 2-like, partial
maker-pcu_contig_13205-snap-gene-0.0-mRNA-1	73.8025	Conserved gene of unknown function
maker-pcu_contig_1321-snap-gene-0.4-mRNA-1	193.525	Serine/threonine protein kinase
maker-pcu_contig_13227-snap-gene-0.0-mRNA-1	17.5465	Conserved gene of unknown function
maker-pcu_contig_13237-fgenesh-gene-0.0-mRNA-1	11.4405	Conserved gene of unknown function
maker-pcu_contig_13244-snap-gene-0.0-mRNA-1	99.5348	Conserved gene of unknown function
maker-pcu_contig_13251-snap-gene-0.0-mRNA-1	13.4173	Glucanase inhibitor protein 2
maker-pcu_contig_1326-snap-gene-0.2-mRNA-1	25.536	Conserved gene of unknown function
maker-pcu_contig_13266-snap-gene-0.0-mRNA-1	770.2	Crinkler (CRN) family protein
maker-pcu_contig_1327-snap-gene-0.2-mRNA-1	9.15588	Conserved gene of unknown function
maker-pcu_contig_1327-snap-gene-0.4-mRNA-1	28.6389	GPI-anchored protein
maker-pcu_contig_1329-fgenesh-gene-0.3-mRNA-1	1061.32	60S ribosomal protein L12
maker-pcu_contig_1329-snap-gene-0.4-mRNA-1	4.86678	Calcyphosin
maker-pcu_contig_1329-snap-gene-0.5-mRNA-1	486.17	EC1118_1E8_0232p
maker-pcu_contig_1329-snap-gene-0.7-mRNA-1	6.95184	Altronate oxidoreductase
maker-pcu_contig_133-snap-gene-0.10-mRNA-1	7.14667	CDS Pa_2_1450
maker-pcu_contig_133-snap-gene-0.11-mRNA-1	42.5404	Conserved gene of unknown function
maker-pcu_contig_133-snap-gene-0.12-mRNA-1	4.40563	DENND4A protein
maker-pcu_contig_133-snap-gene-0.13-mRNA-1	17.5176	Brefeldin A-inhibited guanine nucleotide-exchange protein
maker-pcu_contig_133-snap-gene-0.14-mRNA-1	4.46315	Conserved gene of unknown function
maker-pcu_contig_133-snap-gene-0.15-mRNA-1	18.2952	Conserved gene of unknown function
maker-pcu_contig_133-snap-gene-0.17-mRNA-1	0.112852	Gene of unknown function
maker-pcu_contig_133-snap-gene-0.18-mRNA-1	6.84579	Protein Y54E5A.7, partially confirmed by transcript evidence
maker-pcu_contig_133-snap-gene-0.19-mRNA-1	11.5017	Oligopeptidase A
maker-pcu_contig_133-snap-gene-0.7-mRNA-1	290.805	Inositol-3,4-bisphosphate 4-phosphatase
maker-pcu_contig_1330-snap-gene-0.2-mRNA-1	22.8065	Selenide, water dikinase
maker-pcu_contig_1330-snap-gene-0.3-mRNA-1	801.037	Syntaxin 7
maker-pcu_contig_13309-snap-gene-0.1-mRNA-1	169.305	Phospholipase A2
maker-pcu_contig_1331-fgenesh-gene-0.0-mRNA-1	307.279	Conserved gene of unknown function
maker-pcu_contig_1331-snap-gene-0.4-mRNA-1	7.68717	Ribonuclease 3
maker-pcu_contig_1331-snap-gene-0.5-mRNA-1	44.6475	WD repeat domain 76 (Predicted)
maker-pcu_contig_13330-snap-gene-0.0-mRNA-1	153.866	Secreted RxLR effector peptide protein
maker-pcu_contig_1336-fgenesh-gene-0.0-mRNA-1	99.2225	V-type proton ATPase subunit E
maker-pcu_contig_1336-snap-gene-0.4-mRNA-1	87.5707	DUF339 family protein
maker-pcu_contig_1336-snap-gene-0.6-mRNA-1	18.0593	Gene of unknown function
maker-pcu_contig_13390-snap-gene-0.1-mRNA-1	69.0828	TFIIH basal transcription factor complex helicase XPB subunit
maker-pcu_contig_134-snap-gene-0.3-mRNA-1	18.0025	Kinesin
maker-pcu_contig_134-snap-gene-0.4-mRNA-1	189.701	Kinesin
maker-pcu_contig_134-snap-gene-0.5-mRNA-1	5.06682	Abnormal spindle-like microcephaly-associated protein
maker-pcu_contig_134-snap-gene-0.6-mRNA-1	33.7103	Conserved gene of unknown function
maker-pcu_contig_134-snap-gene-0.8-mRNA-1	25.0772	Myotubularin
maker-pcu_contig_134-snap-gene-0.9-mRNA-1	6.15446	Myotubularin
maker-pcu_contig_1340-snap-gene-0.3-mRNA-1	7.59475	Transposase
maker-pcu_contig_13405-fgenesh-gene-0.0-mRNA-1	21.9503	Cryptochrome
maker-pcu_contig_1341-snap-gene-0.1-mRNA-1	3.10807	NBP2b protein
maker-pcu_contig_1341-snap-gene-0.5-mRNA-1	644.079	Conserved gene of unknown function
maker-pcu_contig_1342-snap-gene-0.1-mRNA-1	7.73013	ATP-binding Cassette (ABC) Superfamily
maker-pcu_contig_1342-snap-gene-0.2-mRNA-1	27.6186	Aspartyl/Asparaginyl beta-hydroxylase
maker-pcu_contig_1344-fgenesh-gene-0.2-mRNA-1	39.7646	U6 snRNA-associated Sm LSm3
maker-pcu_contig_1344-snap-gene-0.3-mRNA-1	216.945	Tristetraproline
maker-pcu_contig_1344-snap-gene-0.4-mRNA-1	13.5966	Conserved gene of unknown function
maker-pcu_contig_1346-snap-gene-0.6-mRNA-1	7.32943	SAP DNA-binding domain-containing protein
maker-pcu_contig_1348-snap-gene-0.1-mRNA-1	40.7144	Conserved hypothetical protein
maker-pcu_contig_1348-snap-gene-0.2-mRNA-1	7549.04	Conserved gene of unknown function
maker-pcu_contig_1348-snap-gene-0.3-mRNA-1	61.0004	Conserved gene of unknown function
maker-pcu_contig_13484-snap-gene-0.0-mRNA-1	21.8891	Gene of unknown function
maker-pcu_contig_13491-snap-gene-0.0-mRNA-1	24.5983	Beta-glucan synthesis-associated protein
maker-pcu_contig_13496-snap-gene-0.0-mRNA-1	13.7991	Conserved gene of unknown function
maker-pcu_contig_13498-snap-gene-0.0-mRNA-1	5.95625	Conserved gene of unknown function
maker-pcu_contig_135-fgenesh-gene-0.2-mRNA-1	27.387	Spermidine synthase
maker-pcu_contig_135-fgenesh-gene-0.4-mRNA-1	655.479	Cytochrome c oxidase assembly protein COX11, mitochondrial
maker-pcu_contig_135-snap-gene-0.12-mRNA-1	11.9235	Testis-expressed sequence 9 protein.
maker-pcu_contig_135-snap-gene-0.13-mRNA-1	268.55	Syntaxin 72
maker-pcu_contig_135-snap-gene-0.15-mRNA-1	1161.3	60S ribosomal protein L32-1
maker-pcu_contig_135-snap-gene-0.21-mRNA-1	29.8428	Ankyrin repeat protein
maker-pcu_contig_135-snap-gene-0.22-mRNA-1	12.8951	U1 small nuclear ribonucleoprotein C
maker-pcu_contig_135-snap-gene-0.23-mRNA-1	10.4684	Dymeclin
maker-pcu_contig_135-snap-gene-0.24-mRNA-1	26.073	RNA exonuclease NGL1
maker-pcu_contig_135-snap-gene-0.25-mRNA-1	49.8315	26S proteasome non-ATPase regulatory subunit 10
maker-pcu_contig_135-snap-gene-0.27-mRNA-1	123.161	Glycine cleavage system H protein, mitochondrial
maker-pcu_contig_135-snap-gene-0.28-mRNA-1	23.9655	Serine/threonine-protein kinase 19
maker-pcu_contig_1351-snap-gene-0.1-mRNA-1	4.08337	Heme binding protein
maker-pcu_contig_1351-snap-gene-0.2-mRNA-1	4.6557	Conserved gene of unknown function
maker-pcu_contig_1351-snap-gene-0.4-mRNA-1	430.523	DEHA2B00726p
maker-pcu_contig_1351-snap-gene-0.5-mRNA-1	650.807	CG6694-PA, partial
maker-pcu_contig_1351-snap-gene-0.6-mRNA-1	155.379	Conserved gene of unknown function
maker-pcu_contig_1352-fgenesh-gene-0.0-mRNA-1	102.456	Conserved gene of unknown function
maker-pcu_contig_1352-snap-gene-0.4-mRNA-1	65.8582	Conserved gene of unknown function
maker-pcu_contig_1352-snap-gene-0.5-mRNA-1	5.99385	Importin
maker-pcu_contig_1353-snap-gene-0.3-mRNA-1	41.0837	Gene of unknown function
maker-pcu_contig_1353-snap-gene-0.4-mRNA-1	5.11638	Conserved gene of unknown function
maker-pcu_contig_1353-snap-gene-0.5-mRNA-1	4.50993	Chromatin remodeling complex WSTF-ISWI, large subunit
maker-pcu_contig_1353-snap-gene-0.6-mRNA-1	174.131	ZZ-type zinc finger-containing protein
maker-pcu_contig_13537-snap-gene-0.1-mRNA-1	58.6124	Conserved gene of unknown function
maker-pcu_contig_13544-snap-gene-0.1-mRNA-1	8.19464	Gene of unknown function
maker-pcu_contig_13544-snap-gene-0.2-mRNA-1	6.03623	Crinkler (CRN) family protein
maker-pcu_contig_13554-snap-gene-0.0-mRNA-1	58.9554	Conserved gene of unknown function
maker-pcu_contig_1358-snap-gene-0.1-mRNA-1	10503.1	GK22061
maker-pcu_contig_1358-snap-gene-0.2-mRNA-1	175.782	Gene of unknown function
maker-pcu_contig_13585-snap-gene-0.1-mRNA-1	33.4692	Protein kinase
maker-pcu_contig_1359-fgenesh-gene-0.1-mRNA-1	27.5049	Elongation factor 1-gamma
maker-pcu_contig_1359-snap-gene-0.2-mRNA-1	290.245	Phosphatidylinositol-4-phosphate-5-kinase (Pi-PIPK-D2)
maker-pcu_contig_1359-snap-gene-0.5-mRNA-1	23.5653	Gene of unknown function
maker-pcu_contig_136-fgenesh-gene-0.1-mRNA-1	29.5996	Elongation of very long chain fatty acids protein
maker-pcu_contig_136-fgenesh-gene-0.3-mRNA-1	86.5884	Serine/threonine-protein phosphatase
maker-pcu_contig_136-snap-gene-0.10-mRNA-1	5.76302	Conserved gene of unknown function
maker-pcu_contig_136-snap-gene-0.14-mRNA-1	7.26393	Conserved gene of unknown function
maker-pcu_contig_136-snap-gene-0.15-mRNA-1	10.7731	Gene of unknown function
maker-pcu_contig_136-snap-gene-0.17-mRNA-1	20.2092	Flagellar/basal body protein
maker-pcu_contig_136-snap-gene-0.18-mRNA-1	15.9986	Conserved gene of unknown function
maker-pcu_contig_136-snap-gene-0.19-mRNA-1	4.09732	GE15858
maker-pcu_contig_136-snap-gene-0.20-mRNA-1	9.84988	Conserved gene of unknown function
maker-pcu_contig_136-snap-gene-0.8-mRNA-1	4.70248	Sporangia induced TRP protein
maker-pcu_contig_136-snap-gene-0.9-mRNA-1	153.414	Conserved gene of unknown function
maker-pcu_contig_13609-snap-gene-0.0-mRNA-1	6.24735	Secreted RxLR effector peptide protein
maker-pcu_contig_1362-snap-gene-0.1-mRNA-1	24.7137	Protein phosphatase 2C
maker-pcu_contig_13623-snap-gene-0.0-mRNA-1	8.65647	Conserved gene of unknown function
maker-pcu_contig_13630-snap-gene-0.1-mRNA-1	15.6158	Conserved gene of unknown function
maker-pcu_contig_13632-snap-gene-0.0-mRNA-1	23.0761	Ubiquitin carboxyl-terminal hydrolase
maker-pcu_contig_13634-fgenesh-gene-0.0-mRNA-1	34.3036	ADP-ribosylation factor
maker-pcu_contig_13649-snap-gene-0.1-mRNA-1	19.9156	Conserved gene of unknown function
maker-pcu_contig_1365-snap-gene-0.3-mRNA-1	9.5019	Phosphatidylinositol kinase (PIK-I)
maker-pcu_contig_1365-snap-gene-0.5-mRNA-1	7.3562	Gene of unknown function
maker-pcu_contig_1366-snap-gene-0.1-mRNA-1	319.684	HRAS-like suppressor
maker-pcu_contig_1366-snap-gene-0.2-mRNA-1	154.384	HRAS-like suppressor
maker-pcu_contig_1366-snap-gene-0.3-mRNA-1	24.2574	Lipin
maker-pcu_contig_13669-snap-gene-0.0-mRNA-1	174.782	Conserved gene of unknown function
maker-pcu_contig_1367-fgenesh-gene-0.1-mRNA-1	18.07	Trans-2-enoyl-CoA reductase
maker-pcu_contig_1367-snap-gene-0.3-mRNA-1	6.03659	Conserved gene of unknown function
maker-pcu_contig_1367-snap-gene-0.4-mRNA-1	5.94927	Conserved gene of unknown function
maker-pcu_contig_1367-snap-gene-0.7-mRNA-1	7.89821	Sporangia-induced kinesin
maker-pcu_contig_13687-snap-gene-0.0-mRNA-1	15.375	Crinkler (CRN) family protein
maker-pcu_contig_1369-snap-gene-0.3-mRNA-1	18.2253	Conserved gene of unknown function
maker-pcu_contig_13691-snap-gene-0.1-mRNA-1	9.5126	Urocanase
maker-pcu_contig_137-snap-gene-0.11-mRNA-1	23.688	Zinc finger protein 2
maker-pcu_contig_137-snap-gene-0.12-mRNA-1	16.6937	Gene of unknown function
maker-pcu_contig_137-snap-gene-0.13-mRNA-1	10.0519	Conserved gene of unknown function
maker-pcu_contig_137-snap-gene-0.17-mRNA-1	37.7784	Conserved gene of unknown function
maker-pcu_contig_137-snap-gene-0.7-mRNA-1	180.552	DNA topoisomerase 2
maker-pcu_contig_137-snap-gene-0.8-mRNA-1	27.5764	UPF0567 protein LOC121952 homolog
maker-pcu_contig_137-snap-gene-0.9-mRNA-1	68.9078	Contig An08c0030, complete genome
maker-pcu_contig_13703-fgenesh-gene-0.0-mRNA-1	106.483	Conserved gene of unknown function
maker-pcu_contig_13707-snap-gene-0.0-mRNA-1	28.9493	Conserved gene of unknown function
maker-pcu_contig_13712-snap-gene-0.0-mRNA-1	4.20259	Whole genome shotgun sequence assembly, scaffold_220, strain Mel28
maker-pcu_contig_1372-snap-gene-0.1-mRNA-1	6.92263	Cell division cycle protein 20
maker-pcu_contig_1372-snap-gene-0.2-mRNA-1	43.3909	Protein FAM188B
maker-pcu_contig_1372-snap-gene-0.3-mRNA-1	7.37795	FAR (Factor ARrest) Like family member (farl-11)
maker-pcu_contig_1373-snap-gene-0.2-mRNA-1	5.06435	Conserved gene of unknown function
maker-pcu_contig_13731-snap-gene-0.0-mRNA-1	15.7669	Conserved gene of unknown function
maker-pcu_contig_13735-snap-gene-0.1-mRNA-1	369.469	C2 domain-containing protein
maker-pcu_contig_1374-fgenesh-gene-0.0-mRNA-1	76.0313	Conserved gene of unknown function
maker-pcu_contig_1374-snap-gene-0.2-mRNA-1	19.0699	Acetylornithine aminotransferase, mitochondrial
maker-pcu_contig_1374-snap-gene-0.3-mRNA-1	128.544	Transmembrane protein
maker-pcu_contig_1374-snap-gene-0.4-mRNA-1	14.176	Avirulence 4
maker-pcu_contig_1375-snap-gene-0.1-mRNA-1	4.53344	TPR repeat-containing protein
maker-pcu_contig_13754-snap-gene-0.0-mRNA-1	20.6524	Glycoside hydrolase
maker-pcu_contig_13764-snap-gene-0.1-mRNA-1	25.8983	Conserved gene of unknown function
maker-pcu_contig_1377-snap-gene-0.0-mRNA-1	5.95392	Titin isoform N2-B
maker-pcu_contig_13790-snap-gene-0.0-mRNA-1	4.84592	Conserved gene of unknown function
maker-pcu_contig_13791-snap-gene-0.1-mRNA-1	5.27771	Conserved gene of unknown function
maker-pcu_contig_138-fgenesh-gene-0.0-mRNA-1	39.3391	Conserved gene of unknown function
maker-pcu_contig_138-fgenesh-gene-0.4-mRNA-1	108.627	Superoxide dismutase [Cu-Zn]
maker-pcu_contig_138-snap-gene-0.11-mRNA-1	12.4438	Nucampholin
maker-pcu_contig_138-snap-gene-0.7-mRNA-1	4.66822	Dynein heavy chain
maker-pcu_contig_138-snap-gene-0.9-mRNA-1	681.294	Cysteine-rich protein
maker-pcu_contig_13810-snap-gene-0.0-mRNA-1	4.1524	Conserved gene of unknown function
maker-pcu_contig_1384-snap-gene-0.2-mRNA-1	18.4013	Endo-1,3(4)-beta-glucanase
maker-pcu_contig_13842-snap-gene-0.0-mRNA-1	5.00664	SCP-like extracellular protein
maker-pcu_contig_1385-snap-gene-0.4-mRNA-1	7.01176	Chromosome 14 open reading frame 101, partial
maker-pcu_contig_1387-fgenesh-gene-0.2-mRNA-1	50.6158	Hcp beta-lactamase
maker-pcu_contig_13886-snap-gene-0.1-mRNA-1	15.1661	RRNA-processing protein EBP2
maker-pcu_contig_1389-snap-gene-0.3-mRNA-1	18.1453	Conserved gene of unknown function
maker-pcu_contig_1389-snap-gene-0.4-mRNA-1	4.17415	Calmodulin-binding transcription activator
maker-pcu_contig_13898-snap-gene-0.0-mRNA-1	137.626	Crinkler (CRN) family protein
maker-pcu_contig_139-snap-gene-0.10-mRNA-1	59.7029	Zinc carboxypeptidase family protein
maker-pcu_contig_139-snap-gene-0.11-mRNA-1	37.2867	Conserved gene of unknown function
maker-pcu_contig_139-snap-gene-0.13-mRNA-1	6.9994	Metallophosphoesterase 1
maker-pcu_contig_139-snap-gene-0.14-mRNA-1	8.1501	Amino Acid-Polyamine-Organocation (APC) Family
maker-pcu_contig_139-snap-gene-0.16-mRNA-1	18.7054	Nucleolar complex protein 4
maker-pcu_contig_139-snap-gene-0.17-mRNA-1	43.9155	Coatomer subunit delta
maker-pcu_contig_139-snap-gene-0.8-mRNA-1	97.0639	Transcription factor
maker-pcu_contig_139-snap-gene-0.9-mRNA-1	473.046	PST-A protein
maker-pcu_contig_1390-snap-gene-0.3-mRNA-1	15.9532	Cysteine synthase
maker-pcu_contig_1390-snap-gene-0.4-mRNA-1	24.0407	Conserved gene of unknown function
maker-pcu_contig_1390-snap-gene-0.7-mRNA-1	26.2086	Glutamyl-tRNA synthetase
maker-pcu_contig_13908-snap-gene-0.2-mRNA-1	419.241	Cysteine synthase
maker-pcu_contig_13925-snap-gene-0.1-mRNA-1	6.4883	Polysaccharide lyase
maker-pcu_contig_1393-snap-gene-0.1-mRNA-1	192.585	Conserved gene of unknown function
maker-pcu_contig_1393-snap-gene-0.2-mRNA-1	7.33224	Transmembrane protein 43
maker-pcu_contig_1393-snap-gene-0.3-mRNA-1	77.5877	DRTGG domain protein
maker-pcu_contig_1394-fgenesh-gene-0.0-mRNA-1	16.3568	Soluble pyridine nucleotide transhydrogenase
maker-pcu_contig_1394-snap-gene-0.3-mRNA-1	82.268	Presenilin
maker-pcu_contig_1394-snap-gene-0.4-mRNA-1	16.8321	Heterogeneous nuclear ribonucleoprotein A1
maker-pcu_contig_13949-snap-gene-0.0-mRNA-1	9.73581	Conserved gene of unknown function
maker-pcu_contig_1395-snap-gene-0.2-mRNA-1	125.455	Conserved gene of unknown function
maker-pcu_contig_1395-snap-gene-0.4-mRNA-1	6.35438	Conserved gene of unknown function
maker-pcu_contig_1397-snap-gene-0.1-mRNA-1	27.2845	Conserved gene of unknown function
maker-pcu_contig_1397-snap-gene-0.2-mRNA-1	12.3236	Phosphatidylinositol-4-phosphate binding protein
maker-pcu_contig_13981-snap-gene-0.0-mRNA-1	9.75807	Transmembrane protein
maker-pcu_contig_14-fgenesh-gene-0.4-mRNA-1	7.22011	Flagellar associated protein
maker-pcu_contig_14-fgenesh-gene-0.5-mRNA-1	318.779	Conserved gene of unknown function
maker-pcu_contig_14-fgenesh-gene-0.6-mRNA-1	10.3622	Conserved gene of unknown function
maker-pcu_contig_14-snap-gene-0.10-mRNA-1	7.29145	MutT/nudix family protein
maker-pcu_contig_14-snap-gene-0.12-mRNA-1	43.9621	Poly(A) polymerase
maker-pcu_contig_14-snap-gene-0.13-mRNA-1	41.1543	Gene of unknown function
maker-pcu_contig_14-snap-gene-0.17-mRNA-1	4.38332	Conserved gene of unknown function
maker-pcu_contig_14-snap-gene-0.20-mRNA-1	4.30454	Gene of unknown function
maker-pcu_contig_14-snap-gene-0.21-mRNA-1	4.9854	Conserved gene of unknown function
maker-pcu_contig_14-snap-gene-0.26-mRNA-1	26.7176	UDP-galactose transporter
maker-pcu_contig_14-snap-gene-0.28-mRNA-1	11.0228	Serine/threonine-protein phosphatase
maker-pcu_contig_14-snap-gene-0.9-mRNA-1	6.27948	Ubiquitin carboxyl-terminal hydrolase
maker-pcu_contig_140-snap-gene-0.11-mRNA-1	7.2868	Transmembrane protein
maker-pcu_contig_140-snap-gene-0.12-mRNA-1	345.257	Transmembrane protein
maker-pcu_contig_140-snap-gene-0.13-mRNA-1	2217.05	Tubby 1, partial
maker-pcu_contig_140-snap-gene-0.14-mRNA-1	57.3046	Conserved gene of unknown function
maker-pcu_contig_140-snap-gene-0.15-mRNA-1	49.7532	Gene of unknown function
maker-pcu_contig_140-snap-gene-0.16-mRNA-1	13.0945	Gene of unknown function
maker-pcu_contig_140-snap-gene-0.8-mRNA-1	650.734	Gene of unknown function
maker-pcu_contig_1400-snap-gene-0.1-mRNA-1	570.405	P-type ATPase (P-ATPase) Superfamily
maker-pcu_contig_14001-snap-gene-0.1-mRNA-1	37.6093	Conserved gene of unknown function
maker-pcu_contig_14011-snap-gene-0.1-mRNA-1	19.8498	Rhodanese domain protein
maker-pcu_contig_1404-fgenesh-gene-0.0-mRNA-1	686.654	Conserved gene of unknown function
maker-pcu_contig_1405-fgenesh-gene-0.0-mRNA-1	190.794	CCT motif family protein
maker-pcu_contig_14052-fgenesh-gene-0.0-mRNA-1	33.8738	Aldose 1-epimerase
maker-pcu_contig_14055-snap-gene-0.0-mRNA-1	58.4754	Lipase
maker-pcu_contig_1406-snap-gene-0.1-mRNA-1	6.0945	Asparaginyl-tRNA synthetase
maker-pcu_contig_1406-snap-gene-0.2-mRNA-1	10.2219	HSF-type DNA-binding protein
maker-pcu_contig_14062-snap-gene-0.1-mRNA-1	6.64602	Conserved gene of unknown function
maker-pcu_contig_14079-fgenesh-gene-0.0-mRNA-1	662.674	Elongation factor 1-alpha
maker-pcu_contig_1409-snap-gene-0.2-mRNA-1	19.8682	Hydroxyacylglutathione hydrolase
maker-pcu_contig_1409-snap-gene-0.3-mRNA-1	21.1609	SET domain protein with MYND insert (Skm/BOP family)
maker-pcu_contig_1409-snap-gene-0.4-mRNA-1	170.618	Conserved gene of unknown function
maker-pcu_contig_14092-snap-gene-0.0-mRNA-1	610.011	Conserved gene of unknown function
maker-pcu_contig_141-fgenesh-gene-0.0-mRNA-1	30.1135	Adenylate kinase
maker-pcu_contig_141-fgenesh-gene-0.1-mRNA-1	7.73754	Tyrosine phosphatase
maker-pcu_contig_141-snap-gene-0.12-mRNA-1	132.572	Protein kinase
maker-pcu_contig_141-snap-gene-0.13-mRNA-1	15.0109	Conserved gene of unknown function
maker-pcu_contig_141-snap-gene-0.17-mRNA-1	4.67882	ATP-dependent DNA helicase
maker-pcu_contig_141-snap-gene-0.18-mRNA-1	133.618	Glycolipid transfer protein
maker-pcu_contig_141-snap-gene-0.19-mRNA-1	56.4827	Nicastrin
maker-pcu_contig_141-snap-gene-0.24-mRNA-1	22.4622	Trafficking protein particle complex subunit
maker-pcu_contig_141-snap-gene-0.25-mRNA-1	23.5523	Conserved gene of unknown function
maker-pcu_contig_14104-snap-gene-0.0-mRNA-1	11.9827	Conserved gene of unknown function
maker-pcu_contig_14129-fgenesh-gene-0.0-mRNA-1	115.439	Gene of unknown function
maker-pcu_contig_1413-snap-gene-0.1-mRNA-1	26.2271	Conserved gene of unknown function
maker-pcu_contig_1413-snap-gene-0.2-mRNA-1	111.294	Conserved gene of unknown function
maker-pcu_contig_14143-snap-gene-0.1-mRNA-1	29.7908	Conserved gene of unknown function
maker-pcu_contig_1415-fgenesh-gene-0.1-mRNA-1	13.471	Superoxide dismutase
maker-pcu_contig_1415-snap-gene-0.3-mRNA-1	32.6304	UPF0183 family protein
maker-pcu_contig_1415-snap-gene-0.6-mRNA-1	12.5919	Conserved gene of unknown function
maker-pcu_contig_1416-snap-gene-0.0-mRNA-1	25.448	GTPase activating protein (Gyp2)
maker-pcu_contig_1416-snap-gene-0.1-mRNA-1	33.3401	Conserved gene of unknown function
maker-pcu_contig_14165-snap-gene-0.1-mRNA-1	35.0225	Conserved gene of unknown function
maker-pcu_contig_14180-snap-gene-0.1-mRNA-1	41.5405	Alcohol dehydrogenase
maker-pcu_contig_14193-snap-gene-0.0-mRNA-1	8.93088	Major Facilitator Superfamily (MFS)
maker-pcu_contig_142-fgenesh-gene-0.0-mRNA-1	7.57141	Eukaryotic translation initiation factor 3 subunit E-interacting protein
maker-pcu_contig_142-fgenesh-gene-0.4-mRNA-1	236.959	Zinc finger CDGSH domain-containing protein 1
maker-pcu_contig_142-snap-gene-0.10-mRNA-1	50.8381	Conserved gene of unknown function
maker-pcu_contig_142-snap-gene-0.14-mRNA-1	26.9963	Myosin
maker-pcu_contig_142-snap-gene-0.6-mRNA-1	50.8935	Conserved gene of unknown function
maker-pcu_contig_142-snap-gene-0.7-mRNA-1	27.5746	Ankyrin repeat containing protein
maker-pcu_contig_142-snap-gene-0.8-mRNA-1	66.7357	Prohibitin
maker-pcu_contig_142-snap-gene-0.9-mRNA-1	5.64705	Ccdc45 protein
maker-pcu_contig_14202-fgenesh-gene-0.0-mRNA-1	71.285	Conserved gene of unknown function
maker-pcu_contig_1422-fgenesh-gene-0.0-mRNA-1	18.1481	Kinesin
maker-pcu_contig_1422-snap-gene-0.2-mRNA-1	6.18684	Endo-1,3(4)-beta-glucanase
maker-pcu_contig_1423-fgenesh-gene-0.1-mRNA-1	137.128	DNA-binding protein hexbp
maker-pcu_contig_1423-fgenesh-gene-0.2-mRNA-1	97.9199	Phosphoenolpyruvate carboxykinase
maker-pcu_contig_1425-fgenesh-gene-0.1-mRNA-1	35.198	Catalase-peroxidase
maker-pcu_contig_1425-snap-gene-0.2-mRNA-1	21.6397	Peptidyl-prolyl cis-trans isomerase
maker-pcu_contig_1425-snap-gene-0.3-mRNA-1	53.8842	Para-aminobenzoate synthase
maker-pcu_contig_14255-snap-gene-0.0-mRNA-1	5.18499	Glycoprotein-N-acetylgalactosamine 3-beta-galactosyltransferase
maker-pcu_contig_1428-fgenesh-gene-0.0-mRNA-1	217.376	Gene of unknown function
maker-pcu_contig_1428-fgenesh-gene-0.1-mRNA-1	86.8485	26S proteasome non-ATPase regulatory subunit
maker-pcu_contig_1428-snap-gene-0.6-mRNA-1	96.6198	Kinesin
maker-pcu_contig_1428-snap-gene-0.7-mRNA-1	12.3718	Kinesin
maker-pcu_contig_1428-snap-gene-0.8-mRNA-1	13.5657	GH21903p
maker-pcu_contig_1429-snap-gene-0.2-mRNA-1	58.7907	Drug/Metabolite Transporter (DMT) Superfamily
maker-pcu_contig_1429-snap-gene-0.3-mRNA-1	8.24786	Novel protein
maker-pcu_contig_1429-snap-gene-0.4-mRNA-1	20.0074	Transmembrane protein 56
maker-pcu_contig_143-snap-gene-0.5-mRNA-1	31.7609	Leucine Rich Repeat family protein
maker-pcu_contig_143-snap-gene-0.6-mRNA-1	17.5782	Acetate kinase
maker-pcu_contig_143-snap-gene-0.7-mRNA-1	7.10248	Transmembrane protein
maker-pcu_contig_143-snap-gene-0.8-mRNA-1	30.8017	Conserved gene of unknown function
maker-pcu_contig_143-snap-gene-0.9-mRNA-1	4.10444	Conserved gene of unknown function
maker-pcu_contig_1430-snap-gene-0.5-mRNA-1	67.2496	H-or Na-translocating F-type, V-type and A-type ATPase (F-ATPase) Superfamily
maker-pcu_contig_1433-fgenesh-gene-0.0-mRNA-1	50.3211	Conserved gene of unknown function
maker-pcu_contig_1433-snap-gene-0.2-mRNA-1	227.601	Conserved gene of unknown function
maker-pcu_contig_1434-fgenesh-gene-0.1-mRNA-1	99.7087	Elongation factor 3
maker-pcu_contig_1434-snap-gene-0.2-mRNA-1	19.782	CBS domain multi-pass transmembrane protein
maker-pcu_contig_1435-snap-gene-0.1-mRNA-1	23.9278	Protein kinase
maker-pcu_contig_1436-snap-gene-0.3-mRNA-1	9.80582	ATPase of the PP-loop superfamily
maker-pcu_contig_1437-snap-gene-0.1-mRNA-1	51.9051	Secreted RxLR effector peptide protein
maker-pcu_contig_14371-snap-gene-0.0-mRNA-1	4.09292	Conserved gene of unknown function
maker-pcu_contig_14374-snap-gene-0.0-mRNA-1	11.6648	Secreted RxLR effector peptide protein
maker-pcu_contig_1438-fgenesh-gene-0.1-mRNA-1	99.545	Conserved gene of unknown function
maker-pcu_contig_1438-snap-gene-0.2-mRNA-1	8.61173	Transmembrane protein
maker-pcu_contig_1438-snap-gene-0.3-mRNA-1	50.2485	Conserved gene of unknown function
maker-pcu_contig_1438-snap-gene-0.5-mRNA-1	49.1699	Transmembrane protein
maker-pcu_contig_14388-fgenesh-gene-0.0-mRNA-1	86.6882	Histone H2A
maker-pcu_contig_14388-snap-gene-0.1-mRNA-1	58.1354	Histone H2A
maker-pcu_contig_1439-snap-gene-0.0-mRNA-1	75.37	Transposase
maker-pcu_contig_14399-fgenesh-gene-0.0-mRNA-1	97.0721	Luminal-binding protein 3
maker-pcu_contig_144-fgenesh-gene-0.2-mRNA-1	11.6766	Wd-repeat protein
maker-pcu_contig_144-fgenesh-gene-0.6-mRNA-1	7.24287	Gene of unknown function
maker-pcu_contig_144-snap-gene-0.11-mRNA-1	20.9369	Hyvh1 dual specificity phosphatase
maker-pcu_contig_144-snap-gene-0.13-mRNA-1	6.86455	Conserved gene of unknown function
maker-pcu_contig_144-snap-gene-0.15-mRNA-1	7.33656	Drug/Metabolite Transporter (DMT) Superfamily
maker-pcu_contig_144-snap-gene-0.17-mRNA-1	109.072	Eukaryotic translation initiation factor 2-alpha kinase
maker-pcu_contig_144-snap-gene-0.18-mRNA-1	5.55048	Conserved gene of unknown function
maker-pcu_contig_144-snap-gene-0.7-mRNA-1	9.01687	Ankyrin repeat domain 26
maker-pcu_contig_144-snap-gene-0.8-mRNA-1	12.0295	E2F-associated phosphoprotein
maker-pcu_contig_1440-snap-gene-0.1-mRNA-1	20.0912	Conserved gene of unknown function
maker-pcu_contig_1440-snap-gene-0.2-mRNA-1	11.9513	Gene of unknown function
maker-pcu_contig_14408-snap-gene-0.1-mRNA-1	221.038	Conserved gene of unknown function
maker-pcu_contig_14418-snap-gene-0.0-mRNA-1	273.81	GAF domain-containing protein
maker-pcu_contig_1442-snap-gene-0.1-mRNA-1	4.87673	Lysyl-tRNA synthetase
maker-pcu_contig_1442-snap-gene-0.2-mRNA-1	16.6119	Gene of unknown function
maker-pcu_contig_1442-snap-gene-0.4-mRNA-1	32.4747	Condensin-2 complex subunit H2
maker-pcu_contig_14420-snap-gene-0.0-mRNA-1	87.5408	Inositol-3,4-bisphosphate 4-phosphatase
maker-pcu_contig_1443-snap-gene-0.2-mRNA-1	939.444	Conserved gene of unknown function
maker-pcu_contig_1443-snap-gene-0.3-mRNA-1	6.19554	Protein kinase
maker-pcu_contig_1445-snap-gene-0.1-mRNA-1	173.335	Ribosomal protein L36
maker-pcu_contig_1445-snap-gene-0.2-mRNA-1	27.0896	Conserved hypothetical protein
maker-pcu_contig_1445-snap-gene-0.3-mRNA-1	172.706	Protein ZK899.2, partially confirmed by transcript evidence
maker-pcu_contig_1445-snap-gene-0.4-mRNA-1	890.166	Asp1
maker-pcu_contig_1446-snap-gene-0.2-mRNA-1	8.54054	DNA primase
maker-pcu_contig_1446-snap-gene-0.3-mRNA-1	9.59985	Conserved gene of unknown function
maker-pcu_contig_1446-snap-gene-0.4-mRNA-1	28.6195	Actin
maker-pcu_contig_14479-snap-gene-0.0-mRNA-1	13.9264	Protein kinase
maker-pcu_contig_1448-snap-gene-0.1-mRNA-1	48.9303	Histone demethylase
maker-pcu_contig_14484-snap-gene-0.0-mRNA-1	21.3177	Conserved gene of unknown function
maker-pcu_contig_1449-fgenesh-gene-0.0-mRNA-1	5.02766	Gene of unknown function
maker-pcu_contig_14495-snap-gene-0.0-mRNA-1	109.858	Gene of unknown function
maker-pcu_contig_14495-snap-gene-0.1-mRNA-1	17.3246	Gene of unknown function
maker-pcu_contig_14496-snap-gene-0.0-mRNA-1	10.8151	Cysteine protease family C01A
maker-pcu_contig_145-snap-gene-0.10-mRNA-1	388.047	Glycoside hydrolase
maker-pcu_contig_145-snap-gene-0.11-mRNA-1	34.4801	Conserved gene of unknown function
maker-pcu_contig_145-snap-gene-0.12-mRNA-1	67.5005	Serine protease family S09X
maker-pcu_contig_145-snap-gene-0.13-mRNA-1	8.30904	Exportin-4
maker-pcu_contig_145-snap-gene-0.14-mRNA-1	62.962	Conserved gene of unknown function
maker-pcu_contig_145-snap-gene-0.15-mRNA-1	10.0101	Leucine Rich Repeat family protein
maker-pcu_contig_145-snap-gene-0.17-mRNA-1	68.0635	DegT/DnrJ/EryC1/StrS aminotransferase
maker-pcu_contig_145-snap-gene-0.6-mRNA-1	15.7045	Protein kinase
maker-pcu_contig_145-snap-gene-0.7-mRNA-1	15.1705	ATPase WRNIP1
maker-pcu_contig_145-snap-gene-0.8-mRNA-1	16.3765	Conserved gene of unknown function
maker-pcu_contig_145-snap-gene-0.9-mRNA-1	2320.2	Glycoside hydrolase
maker-pcu_contig_1451-fgenesh-gene-0.0-mRNA-1	4.53632	N-acetyltransferase
maker-pcu_contig_14518-snap-gene-0.0-mRNA-1	7.21535	Conserved gene of unknown function
maker-pcu_contig_14518-snap-gene-0.1-mRNA-1	2.17096	Crinkler (CRN) family protein
maker-pcu_contig_1452-snap-gene-0.1-mRNA-1	320.371	Conserved gene of unknown function
maker-pcu_contig_14531-snap-gene-0.1-mRNA-1	677.75	Conserved gene of unknown function
maker-pcu_contig_14533-snap-gene-0.0-mRNA-1	24.4198	Alkyldihydroxyacetonephosphate synthase, peroxisomal
maker-pcu_contig_1454-fgenesh-gene-0.0-mRNA-1	1342.24	Conserved gene of unknown function
maker-pcu_contig_1456-fgenesh-gene-0.1-mRNA-1	31.4112	Conserved gene of unknown function
maker-pcu_contig_1456-snap-gene-0.2-mRNA-1	4.12393	Appr-1-p processing enzyme family protein
maker-pcu_contig_1456-snap-gene-0.3-mRNA-1	10.3756	Gene of unknown function
maker-pcu_contig_1456-snap-gene-0.4-mRNA-1	39.8383	Phosphatidylinositide phosphatase SAC1
maker-pcu_contig_14562-snap-gene-0.1-mRNA-1	14.4699	ATP-binding Cassette (ABC) Superfamily
maker-pcu_contig_1459-fgenesh-gene-0.0-mRNA-1	45.1522	Unactive progesterone receptor, 23 kD
maker-pcu_contig_146-fgenesh-gene-0.3-mRNA-1	152.397	Protein phosphatase 2C
maker-pcu_contig_146-snap-gene-0.12-mRNA-1	15.4321	Voltage-gated Ion Channel (VIC) Superfamily
maker-pcu_contig_146-snap-gene-0.13-mRNA-1	10.7531	Mitochondrial Carrier (MC) Family
maker-pcu_contig_146-snap-gene-0.14-mRNA-1	94.8465	Conserved gene of unknown function
maker-pcu_contig_146-snap-gene-0.18-mRNA-1	109.947	Chloride Channel (ClC) Family
maker-pcu_contig_146-snap-gene-0.19-mRNA-1	144.325	Conserved gene of unknown function
maker-pcu_contig_146-snap-gene-0.6-mRNA-1	52.1422	Liver stage antigen
maker-pcu_contig_146-snap-gene-0.7-mRNA-1	224.386	Conserved gene of unknown function
maker-pcu_contig_146-snap-gene-0.9-mRNA-1	7.87744	Tubulin-tyrosine ligase family
maker-pcu_contig_1462-fgenesh-gene-0.1-mRNA-1	204.51	GH24400
maker-pcu_contig_1462-fgenesh-gene-0.2-mRNA-1	4.463	CUG-BP-and ETR-3-like factor
maker-pcu_contig_1462-snap-gene-0.3-mRNA-1	5.89925	Zinc (Zn2)-Iron (Fe2) Permease (ZIP) family
maker-pcu_contig_1464-fgenesh-gene-0.0-mRNA-1	32.6487	Transmembrane protein
maker-pcu_contig_1464-snap-gene-0.1-mRNA-1	95.2038	Beta-glucan synthesis-associated protein
maker-pcu_contig_1466-snap-gene-0.2-mRNA-1	9.58852	Protein phosphatase 2
maker-pcu_contig_14669-snap-gene-0.1-mRNA-1	18.2601	Conserved gene of unknown function
maker-pcu_contig_1468-snap-gene-0.2-mRNA-1	10.2833	Conserved gene of unknown function
maker-pcu_contig_1469-snap-gene-0.1-mRNA-1	4.3021	Malate dehydrogenase
maker-pcu_contig_147-snap-gene-0.12-mRNA-1	9.88203	Alcohol dehydrogenase
maker-pcu_contig_147-snap-gene-0.6-mRNA-1	81.2361	Conserved gene of unknown function
maker-pcu_contig_147-snap-gene-0.7-mRNA-1	7.97656	Microtubule binding protein
maker-pcu_contig_147-snap-gene-0.9-mRNA-1	5.55779	Run and tbc1 domain containing 3, plant
maker-pcu_contig_14727-snap-gene-0.0-mRNA-1	23.846	Glucanase inhibitor protein 1
maker-pcu_contig_1473-snap-gene-0.5-mRNA-1	95.9389	Gene of unknown function
maker-pcu_contig_1473-snap-gene-0.6-mRNA-1	18.3177	Conserved gene of unknown function
maker-pcu_contig_14731-snap-gene-0.1-mRNA-1	4.22703	Conserved gene of unknown function
maker-pcu_contig_1476-snap-gene-0.1-mRNA-1	58.1432	Myosin
maker-pcu_contig_14762-snap-gene-0.1-mRNA-1	1.18293	Conserved gene of unknown function
maker-pcu_contig_1478-snap-gene-0.2-mRNA-1	12.7936	SDA1 family protein
maker-pcu_contig_1478-snap-gene-0.3-mRNA-1	16.2597	Zgc:92518
maker-pcu_contig_1478-snap-gene-0.4-mRNA-1	46.1932	Solute carrier family, facilitated glucose transporter
maker-pcu_contig_14798-snap-gene-0.0-mRNA-1	77.0659	Acylamino-acid-releasing enzyme
maker-pcu_contig_14798-snap-gene-0.1-mRNA-1	131.498	Acylamino-acid-releasing enzyme
maker-pcu_contig_1480-fgenesh-gene-0.0-mRNA-1	25.0009	Hypoxanthine-guanine phosphoribosyltransferase
maker-pcu_contig_1480-snap-gene-0.3-mRNA-1	10.7126	WD40
maker-pcu_contig_1480-snap-gene-0.4-mRNA-1	45.5344	BolA-like 3 isoform 1
maker-pcu_contig_1481-fgenesh-gene-0.1-mRNA-1	18.0653	Conserved gene of unknown function
maker-pcu_contig_1481-snap-gene-0.2-mRNA-1	36.732	EF hand family protein
maker-pcu_contig_1483-snap-gene-0.2-mRNA-1	143.699	Exoglucanase 1
maker-pcu_contig_1483-snap-gene-0.3-mRNA-1	13.575	Conserved gene of unknown function
maker-pcu_contig_1483-snap-gene-0.5-mRNA-1	36.5941	Exoglucanase 1
maker-pcu_contig_14831-snap-gene-0.0-mRNA-1	19.4669	Cell wall surface anchor family protein
maker-pcu_contig_1484-snap-gene-0.0-mRNA-1	65.8941	Transmembrane protein
maker-pcu_contig_14840-snap-gene-0.0-mRNA-1	16.7271	Conserved gene of unknown function
maker-pcu_contig_14845-snap-gene-0.0-mRNA-1	4.4498	Restin
maker-pcu_contig_1485-snap-gene-0.1-mRNA-1	8.47412	Metal Ion (Mn2-iron) Transporter (Nramp) Family
maker-pcu_contig_1485-snap-gene-0.4-mRNA-1	10.2588	Mitochondrial Carrier (MC) Family
maker-pcu_contig_1485-snap-gene-0.5-mRNA-1	5.76579	Gene of unknown function
maker-pcu_contig_14858-snap-gene-0.0-mRNA-1	150.577	Crinkler (CRN) family protein
maker-pcu_contig_1486-fgenesh-gene-0.0-mRNA-1	78.4001	Cytochrome b-c1 complex subunit 7
maker-pcu_contig_1486-snap-gene-0.2-mRNA-1	8.05354	Conserved gene of unknown function
maker-pcu_contig_1486-snap-gene-0.6-mRNA-1	85.1953	Conserved gene of unknown function
maker-pcu_contig_1487-fgenesh-gene-0.0-mRNA-1	24.1238	Trafficking protein particle complex subunit 2
maker-pcu_contig_1487-snap-gene-0.4-mRNA-1	43.0168	Dynein light chain/pantothenate kinase
maker-pcu_contig_1487-snap-gene-0.5-mRNA-1	18.8947	Protein pelota
maker-pcu_contig_14876-snap-gene-0.0-mRNA-1	434.813	Clathrin coat assembly protein ap19
maker-pcu_contig_149-snap-gene-0.10-mRNA-1	977.392	Conserved gene of unknown function
maker-pcu_contig_149-snap-gene-0.11-mRNA-1	78.0732	Conserved gene of unknown function
maker-pcu_contig_149-snap-gene-0.7-mRNA-1	9.61522	Tigger transposable element derived 6
maker-pcu_contig_149-snap-gene-0.8-mRNA-1	9.60317	Conserved gene of unknown function
maker-pcu_contig_1490-snap-gene-0.2-mRNA-1	86.181	Peptidyl-prolyl cis-trans isomerase
maker-pcu_contig_1490-snap-gene-0.3-mRNA-1	9.15033	Annexin (Annexin) Family
maker-pcu_contig_1491-snap-gene-0.1-mRNA-1	79.0777	Isoform 3 of 1-phosphatidylinositol-3-phosphate 5-kinase
maker-pcu_contig_1494-snap-gene-0.4-mRNA-1	10.0718	Protein phosphatase 2C
maker-pcu_contig_1495-snap-gene-0.0-mRNA-1	100.391	Regulator of G protein signaling
maker-pcu_contig_1495-snap-gene-0.1-mRNA-1	1045.8	Conserved gene of unknown function
maker-pcu_contig_1496-fgenesh-gene-0.0-mRNA-1	242.381	DNA replication licensing factor Mcm2
maker-pcu_contig_1496-snap-gene-0.1-mRNA-1	17.4948	KIF1 binding protein
maker-pcu_contig_1498-snap-gene-0.5-mRNA-1	28.352	Methyltransferase WBSCR22
maker-pcu_contig_1498-snap-gene-0.6-mRNA-1	5.43412	Glutamate-cysteine ligase catalytic subunit
maker-pcu_contig_1499-snap-gene-0.2-mRNA-1	4.88085	Cystathionine beta-synthase
maker-pcu_contig_1499-snap-gene-0.3-mRNA-1	30.4737	Cystathionine beta-synthase
maker-pcu_contig_1499-snap-gene-0.4-mRNA-1	24.1214	Phosphatidylserine synthase
maker-pcu_contig_14997-snap-gene-0.0-mRNA-1	7.08073	Disease resistance protein
maker-pcu_contig_15-fgenesh-gene-0.7-mRNA-1	157.475	Macrophage migration inhibitory factor
maker-pcu_contig_15-snap-gene-0.16-mRNA-1	52.0901	Conserved gene of unknown function
maker-pcu_contig_15-snap-gene-0.17-mRNA-1	18.6011	Conserved gene of unknown function
maker-pcu_contig_15-snap-gene-0.18-mRNA-1	135.715	Nprl2-pending-prov protein
maker-pcu_contig_15-snap-gene-0.19-mRNA-1	13.4055	Conserved gene of unknown function
maker-pcu_contig_15-snap-gene-0.20-mRNA-1	21.4069	GTF3C5 protein isoform 2
maker-pcu_contig_15-snap-gene-0.21-mRNA-1	5.85196	SEC14 cytosolic factor
maker-pcu_contig_15-snap-gene-0.23-mRNA-1	6.4065	Conserved gene of unknown function
maker-pcu_contig_15-snap-gene-0.25-mRNA-1	28.5727	Flagellar associated protein
maker-pcu_contig_15-snap-gene-0.26-mRNA-1	39.8694	Conserved gene of unknown function
maker-pcu_contig_15-snap-gene-0.27-mRNA-1	112.342	Mitogen-activated protein-binding protein-interacting protein
maker-pcu_contig_15-snap-gene-0.28-mRNA-1	116.74	Ankyrin repeat protein
maker-pcu_contig_15-snap-gene-0.29-mRNA-1	22.5777	Conserved gene of unknown function
maker-pcu_contig_15-snap-gene-0.30-mRNA-1	21.0834	Polycomb group RING finger protein 3
maker-pcu_contig_15-snap-gene-0.31-mRNA-1	59.8787	HECT E3 ubiquitin ligase
maker-pcu_contig_15-snap-gene-0.35-mRNA-1	25.1741	Conserved gene of unknown function
maker-pcu_contig_15-snap-gene-0.36-mRNA-1	45.489	Inactive ubiquitin carboxyl-terminal hydrolase
maker-pcu_contig_15-snap-gene-0.37-mRNA-1	8.84425	Ubulin-tyrosine ligase
maker-pcu_contig_15-snap-gene-0.38-mRNA-1	12.066	Pre-mRNA-splicing helicase BRR2
maker-pcu_contig_15-snap-gene-0.39-mRNA-1	115.293	Protein kinase
maker-pcu_contig_150-fgenesh-gene-0.6-mRNA-1	37.3423	Cysteine protease family C01A
maker-pcu_contig_150-fgenesh-gene-0.7-mRNA-1	7.36241	HCG18987
maker-pcu_contig_150-fgenesh-gene-0.8-mRNA-1	13.0717	Dolichyl-P-Man:Man(5)GlcNAc(2)-PP-dolichyl mannosyltransferase
maker-pcu_contig_150-snap-gene-0.10-mRNA-1	10.1324	Kinesin
maker-pcu_contig_150-snap-gene-0.11-mRNA-1	17.6379	Aldo/keto reductase family
maker-pcu_contig_150-snap-gene-0.13-mRNA-1	42.9959	15-hydroxyprostaglandin dehydrogenase [NAD+]
maker-pcu_contig_150-snap-gene-0.14-mRNA-1	86.9554	Glycosyl transferase
maker-pcu_contig_150-snap-gene-0.16-mRNA-1	10.682	Phosphoglycerate mutase
maker-pcu_contig_150-snap-gene-0.9-mRNA-1	20.1992	DNA-directed RNA polymerase
maker-pcu_contig_15001-snap-gene-0.1-mRNA-1	7.31665	U3 small nucleolar RNA-associated protein
maker-pcu_contig_1501-snap-gene-0.1-mRNA-1	26.5134	Conserved gene of unknown function
maker-pcu_contig_1501-snap-gene-0.2-mRNA-1	27.9689	Transmembrane protein
maker-pcu_contig_15047-snap-gene-0.0-mRNA-1	500.634	Conserved gene of unknown function
maker-pcu_contig_15049-fgenesh-gene-0.0-mRNA-1	37.0601	GPI-anchored protein
maker-pcu_contig_1506-snap-gene-0.1-mRNA-1	28.933	DNA ligase
maker-pcu_contig_1508-fgenesh-gene-0.3-mRNA-1	256.934	Conserved gene of unknown function
maker-pcu_contig_1508-snap-gene-0.4-mRNA-1	9.55015	UPF0533 protein isoform 2
maker-pcu_contig_1508-snap-gene-0.8-mRNA-1	4.71157	DEAD/DEAH box RNA helicase
maker-pcu_contig_151-fgenesh-gene-0.0-mRNA-1	149.739	Steroidogenic acute regulatory protein, mitochondrial
maker-pcu_contig_151-snap-gene-0.11-mRNA-1	4.14137	DNA-dependent protein kinase catalytic subunit
maker-pcu_contig_151-snap-gene-0.7-mRNA-1	21.1079	HECT E3 ubiquitin ligase
maker-pcu_contig_151-snap-gene-0.8-mRNA-1	24.6002	Guanylate-binding protein
maker-pcu_contig_1510-snap-gene-0.3-mRNA-1	17.0284	Ubiquinone biosynthesis protein COQ9
maker-pcu_contig_1510-snap-gene-0.8-mRNA-1	9.93442	MORN repeat-containing protein
maker-pcu_contig_15102-snap-gene-0.0-mRNA-1	16.5674	Gene of unknown function
maker-pcu_contig_15102-snap-gene-0.1-mRNA-1	91.4986	Gene of unknown function
maker-pcu_contig_1511-snap-gene-0.4-mRNA-1	19.8189	Acyl-CoA-binding protein, acbp
maker-pcu_contig_15112-fgenesh-gene-0.0-mRNA-1	479.575	Nad-dependent epimerase/dehydratase
maker-pcu_contig_15120-snap-gene-0.0-mRNA-1	32.5164	Conserved gene of unknown function
maker-pcu_contig_15123-snap-gene-0.2-mRNA-1	598.599	Conserved gene of unknown function
maker-pcu_contig_1513-fgenesh-gene-0.1-mRNA-1	11.998	Proline-rich protein BstNI subfamily 3 precursor
maker-pcu_contig_1513-snap-gene-0.5-mRNA-1	11.4642	Ferroportin (FP) Family
maker-pcu_contig_1515-snap-gene-0.2-mRNA-1	11.298	Conserved gene of unknown function
maker-pcu_contig_1515-snap-gene-0.3-mRNA-1	12.9785	GAF domain-containing protein
maker-pcu_contig_1516-snap-gene-0.1-mRNA-1	17.8157	Conserved gene of unknown function
maker-pcu_contig_1516-snap-gene-0.2-mRNA-1	19.1041	Conserved gene of unknown function
maker-pcu_contig_1516-snap-gene-0.3-mRNA-1	9.01321	GF16769
maker-pcu_contig_1516-snap-gene-0.5-mRNA-1	10.8037	Qa-SNARE, SYP3/Sed5p/Syntaxin 5-type
maker-pcu_contig_15161-snap-gene-0.0-mRNA-1	7.6936	Crinkler (CRN) family protein
maker-pcu_contig_15170-snap-gene-0.0-mRNA-1	120.883	Conserved gene of unknown function
maker-pcu_contig_1519-fgenesh-gene-0.2-mRNA-1	315.187	Conserved gene of unknown function
maker-pcu_contig_1519-snap-gene-0.3-mRNA-1	16.8283	Gene of unknown function
maker-pcu_contig_1519-snap-gene-0.4-mRNA-1	121.108	Conserved gene of unknown function
maker-pcu_contig_1519-snap-gene-0.5-mRNA-1	373.809	Soluble NSF Attachment Protein (SNAP) Receptor (SNARE)
maker-pcu_contig_15194-snap-gene-0.0-mRNA-1	21.6151	Conserved gene of unknown function
maker-pcu_contig_152-snap-gene-0.10-mRNA-1	84.3128	Flagellar associated protein
maker-pcu_contig_152-snap-gene-0.11-mRNA-1	66.4117	Conserved gene of unknown function
maker-pcu_contig_152-snap-gene-0.12-mRNA-1	16.1226	Conserved gene of unknown function
maker-pcu_contig_152-snap-gene-0.3-mRNA-1	69.0077	Sodium/hydrogen exchanger
maker-pcu_contig_152-snap-gene-0.4-mRNA-1	63.3731	Sodium/hydrogen exchanger
maker-pcu_contig_152-snap-gene-0.5-mRNA-1	11.6167	Ubiquitin protein ligase E3 component n-recognin 2
maker-pcu_contig_152-snap-gene-0.6-mRNA-1	27.2404	Phosphomevalonate kinase
maker-pcu_contig_152-snap-gene-0.8-mRNA-1	8.79416	Conserved gene of unknown function
maker-pcu_contig_152-snap-gene-0.9-mRNA-1	105.833	Double stranded RNA binding
maker-pcu_contig_1520-snap-gene-0.3-mRNA-1	39.5099	GF11335
maker-pcu_contig_15203-snap-gene-0.0-mRNA-1	13.7785	Conserved gene of unknown function
maker-pcu_contig_1523-snap-gene-0.3-mRNA-1	292.383	G protein beta subunit 1
maker-pcu_contig_1524-fgenesh-gene-0.0-mRNA-1	2768.85	Conserved gene of unknown function
maker-pcu_contig_1524-fgenesh-gene-0.1-mRNA-1	139.5	Prolyl-tRNA synthetase
maker-pcu_contig_1524-snap-gene-0.3-mRNA-1	58.4259	Conserved gene of unknown function
maker-pcu_contig_1524-snap-gene-0.5-mRNA-1	4.49626	Conserved gene of unknown function
maker-pcu_contig_1525-snap-gene-0.0-mRNA-1	61.2264	Conserved gene of unknown function
maker-pcu_contig_15295-snap-gene-0.0-mRNA-1	83.016	Conserved gene of unknown function
maker-pcu_contig_153-fgenesh-gene-0.0-mRNA-1	7.8224	Peptidyl-prolyl cis-trans isomerase
maker-pcu_contig_153-fgenesh-gene-0.2-mRNA-1	15.1519	Conserved gene of unknown function
maker-pcu_contig_153-snap-gene-0.10-mRNA-1	140.359	Phosphatidylinositol kinase (PIK-G2)
maker-pcu_contig_153-snap-gene-0.11-mRNA-1	5.08401	Conserved gene of unknown function
maker-pcu_contig_153-snap-gene-0.12-mRNA-1	81.3579	Gene of unknown function
maker-pcu_contig_153-snap-gene-0.14-mRNA-1	87.7775	Conserved gene of unknown function
maker-pcu_contig_153-snap-gene-0.15-mRNA-1	7.7214	Conserved gene of unknown function
maker-pcu_contig_1530-snap-gene-0.4-mRNA-1	6.18229	Liver stage antigen
maker-pcu_contig_1530-snap-gene-0.5-mRNA-1	9.87747	Conserved gene of unknown function
maker-pcu_contig_15327-snap-gene-0.0-mRNA-1	23.4975	Conserved gene of unknown function
maker-pcu_contig_1535-snap-gene-0.1-mRNA-1	77.4494	Conserved gene of unknown function
maker-pcu_contig_1535-snap-gene-0.2-mRNA-1	124.557	Gene of unknown function
maker-pcu_contig_1535-snap-gene-0.4-mRNA-1	16.1718	Serine protease family S08A
maker-pcu_contig_1535-snap-gene-0.5-mRNA-1	21.5661	Gene of unknown function
maker-pcu_contig_1535-snap-gene-0.6-mRNA-1	105.238	Conserved gene of unknown function
maker-pcu_contig_1536-fgenesh-gene-0.1-mRNA-1	6.78413	Omega-3 fatty acid desaturase, endoplasmic reticulum
maker-pcu_contig_1536-snap-gene-0.3-mRNA-1	10.9046	Regulator of chromosome condensation (RCC1)
maker-pcu_contig_1536-snap-gene-0.4-mRNA-1	39.2419	Protein kinase
maker-pcu_contig_1536-snap-gene-0.6-mRNA-1	759.455	C protein immunoglobulin-A-binding beta antigen
maker-pcu_contig_15393-snap-gene-0.0-mRNA-1	8.67238	Gene of unknown function
maker-pcu_contig_15393-snap-gene-0.1-mRNA-1	15.2268	Gene of unknown function
maker-pcu_contig_154-fgenesh-gene-0.2-mRNA-1	29.0757	DnaJ subfamily C protein
maker-pcu_contig_154-snap-gene-0.10-mRNA-1	12.1509	Gene of unknown function
maker-pcu_contig_154-snap-gene-0.11-mRNA-1	17.3062	Gene of unknown function
maker-pcu_contig_154-snap-gene-0.12-mRNA-1	15.0316	Conserved gene of unknown function
maker-pcu_contig_154-snap-gene-0.13-mRNA-1	6.66456	Ion channel
maker-pcu_contig_154-snap-gene-0.14-mRNA-1	7.25328	Major Facilitator Superfamily (MFS)
maker-pcu_contig_154-snap-gene-0.18-mRNA-1	62.2822	Oxidation resistance protein (ISS)
maker-pcu_contig_154-snap-gene-0.6-mRNA-1	21.6954	Conserved gene of unknown function
maker-pcu_contig_154-snap-gene-0.7-mRNA-1	1725.52	Transmembrane protein
maker-pcu_contig_154-snap-gene-0.8-mRNA-1	11.2523	GI12386
maker-pcu_contig_154-snap-gene-0.9-mRNA-1	92.8269	Conserved gene of unknown function
maker-pcu_contig_1541-snap-gene-0.1-mRNA-1	9.9184	Liver stage antigen
maker-pcu_contig_1541-snap-gene-0.2-mRNA-1	18.3432	Conserved gene of unknown function
maker-pcu_contig_15414-snap-gene-0.0-mRNA-1	22.0545	Cell 5A endo-1,4-betaglucanase
maker-pcu_contig_15415-snap-gene-0.1-mRNA-1	5.79876	GH15718
maker-pcu_contig_15426-snap-gene-0.0-mRNA-1	12.7784	Conserved gene of unknown function
maker-pcu_contig_15426-snap-gene-0.1-mRNA-1	14.0782	Conserved gene of unknown function
maker-pcu_contig_15431-snap-gene-0.0-mRNA-1	5.05819	Loricrin
maker-pcu_contig_15431-snap-gene-0.1-mRNA-1	14.035	Gene of unknown function
maker-pcu_contig_1544-fgenesh-gene-0.0-mRNA-1	119.51	Electron transfer flavoprotein-ubiquinone oxidoreductase
maker-pcu_contig_1544-snap-gene-0.4-mRNA-1	33.1189	DnaJ heat shock protein
maker-pcu_contig_1544-snap-gene-0.5-mRNA-1	4.21177	Polr3c-prov protein
maker-pcu_contig_15450-snap-gene-0.0-mRNA-1	10.0013	Alkyldihydroxyacetonephosphate synthase, peroxisomal
maker-pcu_contig_15450-snap-gene-0.1-mRNA-1	29.0503	Gene of unknown function
maker-pcu_contig_1547-fgenesh-gene-0.0-mRNA-1	593.283	Glutathione transferase, theta class
maker-pcu_contig_1547-snap-gene-0.2-mRNA-1	4.70046	Cobalamin synthesis protein
maker-pcu_contig_1547-snap-gene-0.4-mRNA-1	8.41792	Nitric-oxide synthase
maker-pcu_contig_1548-snap-gene-0.3-mRNA-1	43.7306	Cell differentiation protein rcd1
maker-pcu_contig_1548-snap-gene-0.4-mRNA-1	150.106	OJ000114_01.6 protein
maker-pcu_contig_15488-snap-gene-0.0-mRNA-1	12.2132	Gene of unknown function
maker-pcu_contig_155-snap-gene-0.10-mRNA-1	12.2169	ATP-dependent DNA helicase 2 subunit
maker-pcu_contig_155-snap-gene-0.4-mRNA-1	7.79727	Chc1-b-prov protein
maker-pcu_contig_155-snap-gene-0.8-mRNA-1	34.7674	Peroxisomal targeting signal 1 receptor
maker-pcu_contig_155-snap-gene-0.9-mRNA-1	18.3225	N-terminal kinase
maker-pcu_contig_1550-snap-gene-0.1-mRNA-1	112.196	Conserved gene of unknown function
maker-pcu_contig_1550-snap-gene-0.2-mRNA-1	104.798	Pirin
maker-pcu_contig_1550-snap-gene-0.3-mRNA-1	16.9571	Regulator of chromosome condensation (RCC1)
maker-pcu_contig_1550-snap-gene-0.4-mRNA-1	30.5381	Myosin heavy chain kinase
maker-pcu_contig_1551-snap-gene-0.3-mRNA-1	19.9187	Conserved gene of unknown function
maker-pcu_contig_1551-snap-gene-0.4-mRNA-1	5.22593	DEAD/DEAH box RNA helicase
maker-pcu_contig_1551-snap-gene-0.5-mRNA-1	160.938	Coated vesicle membrane protein-like isoform 2
maker-pcu_contig_1551-snap-gene-0.6-mRNA-1	49.0505	Peptidase
maker-pcu_contig_1552-snap-gene-0.2-mRNA-1	56.0091	Conserved gene of unknown function
maker-pcu_contig_1552-snap-gene-0.3-mRNA-1	1441.28	Ribosomal protein L37
maker-pcu_contig_15537-snap-gene-0.0-mRNA-1	118.387	Conserved gene of unknown function
maker-pcu_contig_15560-snap-gene-0.1-mRNA-1	31.8777	Ubiquinol:cytochrome c oxidoreductase biogenesis factor
maker-pcu_contig_1559-snap-gene-0.1-mRNA-1	115.931	Cullin family protein
maker-pcu_contig_1559-snap-gene-0.2-mRNA-1	148.793	UDP-glucoronosyl and UDP-glucosyl transferase
maker-pcu_contig_156-fgenesh-gene-0.3-mRNA-1	56.7856	GRF zinc finger family protein
maker-pcu_contig_156-snap-gene-0.10-mRNA-1	5.40543	L-seryl-tRNA(Sec) kinase
maker-pcu_contig_156-snap-gene-0.11-mRNA-1	22.3621	Conserved gene of unknown function
maker-pcu_contig_156-snap-gene-0.12-mRNA-1	22.5261	Protein kinase
maker-pcu_contig_156-snap-gene-0.15-mRNA-1	48.3599	Conserved gene of unknown function
maker-pcu_contig_156-snap-gene-0.16-mRNA-1	23.0408	Neurochondrin family protein
maker-pcu_contig_156-snap-gene-0.6-mRNA-1	2.49055	Conserved gene of unknown function
maker-pcu_contig_156-snap-gene-0.7-mRNA-1	14.289	WD domain-containing protein
maker-pcu_contig_156-snap-gene-0.8-mRNA-1	621.723	Zinc finger family protein
maker-pcu_contig_156-snap-gene-0.9-mRNA-1	7.93505	Lipoprotein
maker-pcu_contig_15622-snap-gene-0.0-mRNA-1	26.4252	Conserved gene of unknown function
maker-pcu_contig_1564-snap-gene-0.0-mRNA-1	26.2657	RING-type ubiquitin ligase of the endosomal and vacuolar membranes
maker-pcu_contig_1564-snap-gene-0.1-mRNA-1	9.77158	WD repeat protein 35
maker-pcu_contig_1564-snap-gene-0.2-mRNA-1	7.96921	Gene of unknown function
maker-pcu_contig_1564-snap-gene-0.3-mRNA-1	6.67925	Gene of unknown function
maker-pcu_contig_15675-snap-gene-0.0-mRNA-1	14.3424	Conserved gene of unknown function
maker-pcu_contig_1568-snap-gene-0.4-mRNA-1	16.6477	Srrm2 protein
maker-pcu_contig_1568-snap-gene-0.5-mRNA-1	9.22761	Tubulin, delta 1 isoform 1
maker-pcu_contig_1569-snap-gene-0.3-mRNA-1	45.5765	M96 mating-specific protein family
maker-pcu_contig_1569-snap-gene-0.6-mRNA-1	7.17111	Amino Acid-Polyamine-Organocation (APC) Family
maker-pcu_contig_1569-snap-gene-0.7-mRNA-1	6.02833	Appr-1-p processing domain protein
maker-pcu_contig_157-fgenesh-gene-0.3-mRNA-1	5.90343	Strictosidine synthase
maker-pcu_contig_157-snap-gene-0.10-mRNA-1	12.3284	Cyclin-dependent kinase
maker-pcu_contig_157-snap-gene-0.13-mRNA-1	11.5821	KCCR13L
maker-pcu_contig_157-snap-gene-0.15-mRNA-1	43.356	Protein phosphatase 2c
maker-pcu_contig_157-snap-gene-0.16-mRNA-1	29.29	HECT E3 ubiquitin ligase
maker-pcu_contig_157-snap-gene-0.7-mRNA-1	33.2012	Myotubularin
maker-pcu_contig_157-snap-gene-0.8-mRNA-1	208.557	Zinc finger protein
maker-pcu_contig_157-snap-gene-0.9-mRNA-1	39.366	DNA-directed RNA polymerase I subunit RPA12
maker-pcu_contig_15726-snap-gene-0.0-mRNA-1	18.7894	NPP1
maker-pcu_contig_1574-snap-gene-0.2-mRNA-1	550.711	Conserved gene of unknown function
maker-pcu_contig_1575-snap-gene-0.3-mRNA-1	36.2906	Gene of unknown function
maker-pcu_contig_15796-snap-gene-0.0-mRNA-1	11.613	Conserved gene of unknown function
maker-pcu_contig_158-fgenesh-gene-0.0-mRNA-1	28.1939	GJ12460
maker-pcu_contig_158-fgenesh-gene-0.2-mRNA-1	20.1674	Pre-mRNA-splicing factor SLU7
maker-pcu_contig_158-fgenesh-gene-0.3-mRNA-1	199.598	Conserved gene of unknown function
maker-pcu_contig_158-snap-gene-0.14-mRNA-1	21.6041	Acetolactate synthase, small subunit
maker-pcu_contig_158-snap-gene-0.15-mRNA-1	17.2288	Bromodomain testis-specific protein, partial
maker-pcu_contig_158-snap-gene-0.16-mRNA-1	24.0084	Phosphomannomutase
maker-pcu_contig_158-snap-gene-0.17-mRNA-1	6.19469	Serine protease family S01A
maker-pcu_contig_158-snap-gene-0.7-mRNA-1	6.49812	Peroxisome assembly factor
maker-pcu_contig_158-snap-gene-0.9-mRNA-1	118.55	Cyclin E
maker-pcu_contig_1580-snap-gene-0.4-mRNA-1	8.82744	Conserved gene of unknown function
maker-pcu_contig_1580-snap-gene-0.5-mRNA-1	6.28003	Regulator of chromosome condensation (RCC1)
maker-pcu_contig_1580-snap-gene-0.6-mRNA-1	20.4013	KLTH0F16500p
maker-pcu_contig_1581-snap-gene-0.1-mRNA-1	39.0843	Conserved gene of unknown function
maker-pcu_contig_1581-snap-gene-0.2-mRNA-1	352.386	Phosphatidylinositol-4-phosphate-5-kinase (PIPK-C)
maker-pcu_contig_1581-snap-gene-0.3-mRNA-1	78.6942	Inorganic pyrophosphatase
maker-pcu_contig_1582-snap-gene-0.2-mRNA-1	8.37021	UDP-glucose:glycoprotein glucosyltransferase
maker-pcu_contig_1582-snap-gene-0.3-mRNA-1	7.06476	Protein virR
maker-pcu_contig_1583-snap-gene-0.1-mRNA-1	22.3404	Calcium-transporting ATPase 1, endoplasmic reticulum-type
maker-pcu_contig_15832-snap-gene-0.0-mRNA-1	31.4294	Tubulin polyglutamylase
maker-pcu_contig_1584-snap-gene-0.2-mRNA-1	16.2663	Mannosyl-oligosaccharide alpha-1,2-mannosidase
maker-pcu_contig_1584-snap-gene-0.3-mRNA-1	8.71322	Dynein heavy chain
maker-pcu_contig_1586-fgenesh-gene-0.1-mRNA-1	26.6516	Prohibitin-2
maker-pcu_contig_1586-fgenesh-gene-0.2-mRNA-1	560.638	40S ribosomal protein S9-1
maker-pcu_contig_1587-snap-gene-0.1-mRNA-1	45.8787	Zinc finger domain protein
maker-pcu_contig_1587-snap-gene-0.2-mRNA-1	9.09864	GF11974
maker-pcu_contig_15872-snap-gene-0.1-mRNA-1	14.405	P-type ATPase (P-ATPase) Superfamily
maker-pcu_contig_1588-snap-gene-0.0-mRNA-1	70.5598	Leukotriene A-4 hydrolase
maker-pcu_contig_159-fgenesh-gene-0.5-mRNA-1	35.5482	Eukaryotic peptide chain release factor subunit 1
maker-pcu_contig_159-snap-gene-0.10-mRNA-1	45.432	Glycosyltransferase
maker-pcu_contig_159-snap-gene-0.13-mRNA-1	93.6499	Conserved gene of unknown function
maker-pcu_contig_159-snap-gene-0.14-mRNA-1	15.2246	High mobility group protein B1
maker-pcu_contig_159-snap-gene-0.15-mRNA-1	14.6448	Esophageal gland cell secretory protein 6
maker-pcu_contig_159-snap-gene-0.6-mRNA-1	8.25083	Transmembrane protein
maker-pcu_contig_159-snap-gene-0.7-mRNA-1	26.2405	Type I inositol-3,4-bisphosphate 4-phosphatase
maker-pcu_contig_1590-fgenesh-gene-0.1-mRNA-1	55.6799	Conserved gene of unknown function
maker-pcu_contig_1590-snap-gene-0.2-mRNA-1	57.1735	Cca1b circadian clock protein CCA1b
maker-pcu_contig_1590-snap-gene-0.3-mRNA-1	62.1066	Chitobiosyldiphosphodolichol beta-mannosyltransferase
maker-pcu_contig_1590-snap-gene-0.4-mRNA-1	14.204	Chitobiosyldiphosphodolichol beta-mannosyltransferase
maker-pcu_contig_15908-snap-gene-0.0-mRNA-1	25.555	Crinkler (CRN) family protein
maker-pcu_contig_1594-fgenesh-gene-0.1-mRNA-1	16.2248	Coiled-coil domain containing 86
maker-pcu_contig_1594-fgenesh-gene-0.2-mRNA-1	17.2115	Retinal protein
maker-pcu_contig_1594-snap-gene-0.5-mRNA-1	59.4548	Conserved gene of unknown function
maker-pcu_contig_1594-snap-gene-0.9-mRNA-1	21.1844	Mitochondrial Carrier (MC) Family
maker-pcu_contig_15944-fgenesh-gene-0.0-mRNA-1	50.5023	PpiC-type peptidyl-prolyl cis-trans isomerase
maker-pcu_contig_1597-fgenesh-gene-0.1-mRNA-1	17.287	Flagellar associated protein
maker-pcu_contig_1597-snap-gene-0.4-mRNA-1	52.3404	OTU domain-containing protein
maker-pcu_contig_1597-snap-gene-0.6-mRNA-1	20.9401	Estrogen receptor binding protein
maker-pcu_contig_1597-snap-gene-0.7-mRNA-1	6.11639	Gene of unknown function
maker-pcu_contig_15970-snap-gene-0.0-mRNA-1	23.2423	Conserved gene of unknown function
maker-pcu_contig_15982-fgenesh-gene-0.0-mRNA-1	79.8149	NaCl-inducible protein
maker-pcu_contig_1599-snap-gene-0.3-mRNA-1	13.4381	Polymerase (RNA) I polypeptide E, 53kDa
maker-pcu_contig_1599-snap-gene-0.4-mRNA-1	20.9015	F-actin-capping protein subunit beta
maker-pcu_contig_1599-snap-gene-0.5-mRNA-1	331.332	Conserved gene of unknown function
maker-pcu_contig_16-fgenesh-gene-0.2-mRNA-1	245.535	Methyltransferase
maker-pcu_contig_16-snap-gene-0.10-mRNA-1	13.4626	Gene of unknown function
maker-pcu_contig_16-snap-gene-0.13-mRNA-1	6.19424	Myoferlin
maker-pcu_contig_16-snap-gene-0.14-mRNA-1	9.47699	Gene of unknown function
maker-pcu_contig_16-snap-gene-0.15-mRNA-1	30.218	Inositol polyphosphate 5-phosphatase
maker-pcu_contig_16-snap-gene-0.16-mRNA-1	7.71105	Gene of unknown function
maker-pcu_contig_16-snap-gene-0.17-mRNA-1	11.2626	CAMP-dependent protein kinase catalytic subunit
maker-pcu_contig_16-snap-gene-0.18-mRNA-1	9.87578	RapGAP/RanGAP domain-containing protein
maker-pcu_contig_16-snap-gene-0.19-mRNA-1	7.50369	NmrA family protein
maker-pcu_contig_16-snap-gene-0.20-mRNA-1	404.031	Gene of unknown function
maker-pcu_contig_16-snap-gene-0.21-mRNA-1	68.6554	CTD-binding SR rA9, partial
maker-pcu_contig_16-snap-gene-0.9-mRNA-1	10.4206	Gene of unknown function
maker-pcu_contig_160-fgenesh-gene-0.2-mRNA-1	24.9865	Proteasome subunit alpha type
maker-pcu_contig_160-fgenesh-gene-0.4-mRNA-1	44.7831	Apolipoprotein A-I-binding protein
maker-pcu_contig_160-snap-gene-0.10-mRNA-1	59.2315	OTU-like cysteine protease family protein
maker-pcu_contig_160-snap-gene-0.12-mRNA-1	8.66424	Dipeptidyl peptidase
maker-pcu_contig_160-snap-gene-0.6-mRNA-1	46.1499	Histone acetyltransferase
maker-pcu_contig_160-snap-gene-0.7-mRNA-1	6.34213	Fatty acid synthase subunit alpha
maker-pcu_contig_160-snap-gene-0.9-mRNA-1	287.572	Ankyrin repeat-rich vertebrate
maker-pcu_contig_16008-snap-gene-0.0-mRNA-1	12.1065	Hypothetical F-box and leucine rich repeat containing protein
maker-pcu_contig_16008-snap-gene-0.1-mRNA-1	18.9886	Conserved gene of unknown function
maker-pcu_contig_1601-fgenesh-gene-0.0-mRNA-1	10.8061	Gene of unknown function
maker-pcu_contig_1601-fgenesh-gene-0.1-mRNA-1	248.526	Pc18g03540 protein
maker-pcu_contig_1601-snap-gene-0.5-mRNA-1	6.62705	Conserved gene of unknown function
maker-pcu_contig_16045-snap-gene-0.0-mRNA-1	10.8151	Gene of unknown function
maker-pcu_contig_16047-snap-gene-0.1-mRNA-1	9.07264	Calcineurin-like phosphoesterase
maker-pcu_contig_16049-snap-gene-0.0-mRNA-1	5.06044	Gene of unknown function
maker-pcu_contig_1609-snap-gene-0.2-mRNA-1	11.1977	Transmembrane protein
maker-pcu_contig_161-snap-gene-0.13-mRNA-1	165.739	Ubiquitin-specific protease
maker-pcu_contig_161-snap-gene-0.14-mRNA-1	5.94659	Tyrosinase
maker-pcu_contig_161-snap-gene-0.16-mRNA-1	104.069	Copper-transporting ATPase
maker-pcu_contig_161-snap-gene-0.7-mRNA-1	13.6596	Glutamine-dependent NAD(+) synthetase
maker-pcu_contig_161-snap-gene-0.8-mRNA-1	15.5272	Proteasome 26S non-ATPase subunit 5
maker-pcu_contig_161-snap-gene-0.9-mRNA-1	213.455	Peptidyl-prolyl cis-trans isomerase, parvulin-type
maker-pcu_contig_1610-snap-gene-0.2-mRNA-1	12.23	Catalase-peroxidase
maker-pcu_contig_1611-snap-gene-0.2-mRNA-1	14.0994	Peptidyl-prolyl cis-trans isomerase
maker-pcu_contig_1612-snap-gene-0.0-mRNA-1	52.3359	Conserved gene of unknown function
maker-pcu_contig_1612-snap-gene-0.1-mRNA-1	4.98995	Conserved gene of unknown function
maker-pcu_contig_1612-snap-gene-0.2-mRNA-1	10.6247	Ankyrin
maker-pcu_contig_1612-snap-gene-0.3-mRNA-1	6.73294	Mitochondrial Carrier (MC) Family
maker-pcu_contig_16124-snap-gene-0.0-mRNA-1	27.4335	Conserved gene of unknown function
maker-pcu_contig_1614-snap-gene-0.0-mRNA-1	29.4029	NPP1
maker-pcu_contig_1614-snap-gene-0.1-mRNA-1	10.9279	Gene of unknown function
maker-pcu_contig_1614-snap-gene-0.2-mRNA-1	4.46981	WD40 repeat-containing protein
maker-pcu_contig_16157-snap-gene-0.0-mRNA-1	22.4735	Conserved gene of unknown function
maker-pcu_contig_1616-snap-gene-0.0-mRNA-1	36.2142	Conserved gene of unknown function
maker-pcu_contig_1616-snap-gene-0.1-mRNA-1	169.305	Conserved gene of unknown function
maker-pcu_contig_16162-snap-gene-0.0-mRNA-1	10.6118	Mannosyl-oligosaccharide alpha-1,2-mannosidase
maker-pcu_contig_16184-snap-gene-0.0-mRNA-1	29.8426	Conserved gene of unknown function
maker-pcu_contig_16197-snap-gene-0.1-mRNA-1	16.5674	Protein kinase
maker-pcu_contig_162-fgenesh-gene-0.0-mRNA-1	19.8883	Conserved gene of unknown function
maker-pcu_contig_162-fgenesh-gene-0.1-mRNA-1	613.68	Protein dpy-30 homolog
maker-pcu_contig_162-snap-gene-0.13-mRNA-1	909.805	Small ubiquitin-like modifier
maker-pcu_contig_162-snap-gene-0.15-mRNA-1	7.02398	Mannose-P-dolichol utilization defect 1 protein
maker-pcu_contig_162-snap-gene-0.16-mRNA-1	22.0418	Protein kinase
maker-pcu_contig_162-snap-gene-0.17-mRNA-1	35.1928	Conserved gene of unknown function
maker-pcu_contig_162-snap-gene-0.18-mRNA-1	72.7154	ATP phosphoribosyltransferase
maker-pcu_contig_162-snap-gene-0.21-mRNA-1	10.0569	Tyrosine-protein phosphatase OCA1
maker-pcu_contig_162-snap-gene-0.22-mRNA-1	268.969	Tyrosine-protein phosphatase OCA1
maker-pcu_contig_162-snap-gene-0.23-mRNA-1	4.28629	Vertebrate vacuolar protein sorting 72 (Yeast)
maker-pcu_contig_162-snap-gene-0.24-mRNA-1	30.502	Secreted RxLR effector peptide protein
maker-pcu_contig_162-snap-gene-0.25-mRNA-1	108.753	Conserved gene of unknown function
maker-pcu_contig_162-snap-gene-0.26-mRNA-1	4.5957	Liver stage antigen
maker-pcu_contig_1620-fgenesh-gene-0.0-mRNA-1	22.2706	Gene of unknown function
maker-pcu_contig_1620-snap-gene-0.2-mRNA-1	26.6662	Serine/threonine-protein kinase-like domain
maker-pcu_contig_1620-snap-gene-0.4-mRNA-1	20.9041	Gene of unknown function
maker-pcu_contig_1620-snap-gene-0.5-mRNA-1	23.2881	Gene of unknown function
maker-pcu_contig_16209-snap-gene-0.0-mRNA-1	10.2938	Gene of unknown function
maker-pcu_contig_16220-snap-gene-0.0-mRNA-1	56.0758	Conserved gene of unknown function
maker-pcu_contig_1625-snap-gene-0.2-mRNA-1	11.4038	EF hand family protein
maker-pcu_contig_1626-snap-gene-0.3-mRNA-1	6.44211	Gene of unknown function
maker-pcu_contig_16262-snap-gene-0.0-mRNA-1	26.0615	Secreted RxLR effector peptide protein
maker-pcu_contig_1627-snap-gene-0.2-mRNA-1	27.3463	ELMO domain-containing protein 2
maker-pcu_contig_1627-snap-gene-0.3-mRNA-1	4.28629	Beta-glucan synthesis-associated protein
maker-pcu_contig_1627-snap-gene-0.4-mRNA-1	5.45441	Beta-glucan synthesis-associated protein
maker-pcu_contig_1628-fgenesh-gene-0.0-mRNA-1	335.431	60S ribosomal protein L27
maker-pcu_contig_1628-snap-gene-0.3-mRNA-1	32.1707	DENND4A protein
maker-pcu_contig_16287-snap-gene-0.0-mRNA-1	34.9313	Conserved gene of unknown function
maker-pcu_contig_16293-snap-gene-0.0-mRNA-1	15.322	ATP binding protein
maker-pcu_contig_163-fgenesh-gene-0.3-mRNA-1	118.968	Ran-specific GTPase-activating protein
maker-pcu_contig_163-snap-gene-0.11-mRNA-1	6.18121	Conserved gene of unknown function
maker-pcu_contig_163-snap-gene-0.12-mRNA-1	18.4698	Ubiquitin thioesterase otubain
maker-pcu_contig_163-snap-gene-0.14-mRNA-1	4.45587	UDP-3-O-[3-hydroxymyristoyl] glucosamine N-acyltransferase
maker-pcu_contig_163-snap-gene-0.17-mRNA-1	54.2774	Phosphatidylinositol synthase (PIS)
maker-pcu_contig_163-snap-gene-0.5-mRNA-1	995.244	Gene of unknown function
maker-pcu_contig_163-snap-gene-0.9-mRNA-1	5.98408	Palmitoyltransferase
maker-pcu_contig_1630-snap-gene-0.2-mRNA-1	24.7753	Zinc ion binding protein
maker-pcu_contig_1630-snap-gene-0.3-mRNA-1	34.3026	Conserved gene of unknown function
maker-pcu_contig_1630-snap-gene-0.4-mRNA-1	65.6843	Conserved gene of unknown function
maker-pcu_contig_1631-snap-gene-0.1-mRNA-1	44.3922	KIAA1529.
maker-pcu_contig_1631-snap-gene-0.2-mRNA-1	5.40754	DNA-directed RNA polymerase III subunit RPC8
maker-pcu_contig_1632-snap-gene-0.1-mRNA-1	5.15491	Nucleolin
maker-pcu_contig_16325-snap-gene-0.0-mRNA-1	36.609	Secreted RxLR effector peptide protein
maker-pcu_contig_16334-snap-gene-0.0-mRNA-1	372.271	Conserved gene of unknown function
maker-pcu_contig_16336-snap-gene-0.1-mRNA-1	14.0821	Beta-glucosidase
maker-pcu_contig_16338-snap-gene-0.0-mRNA-1	39.8387	Conserved gene of unknown function
maker-pcu_contig_1635-snap-gene-0.2-mRNA-1	26.5622	IQ motif containing G
maker-pcu_contig_1635-snap-gene-0.3-mRNA-1	7.83432	Esterase/lipase/thioesterase domain-containing protein
maker-pcu_contig_1637-snap-gene-0.4-mRNA-1	20.3077	Nuclear pore glycoprotein
maker-pcu_contig_1637-snap-gene-0.5-mRNA-1	10.8934	Conserved gene of unknown function
maker-pcu_contig_1638-snap-gene-0.3-mRNA-1	16.7157	Heat Shock transcription factor
maker-pcu_contig_1638-snap-gene-0.4-mRNA-1	9.72069	Conserved gene of unknown function
maker-pcu_contig_1638-snap-gene-0.6-mRNA-1	22.1525	Calcyclin binding protein
maker-pcu_contig_16386-snap-gene-0.0-mRNA-1	6.07737	Gene of unknown function
maker-pcu_contig_1639-snap-gene-0.1-mRNA-1	4.00432	Conserved gene of unknown function
maker-pcu_contig_1639-snap-gene-0.2-mRNA-1	7.48916	ATP-binding Cassette (ABC) superfamily
maker-pcu_contig_16399-snap-gene-0.0-mRNA-1	12.8927	Gene of unknown function
maker-pcu_contig_1641-snap-gene-0.1-mRNA-1	62.9191	Conserved gene of unknown function
maker-pcu_contig_1641-snap-gene-0.2-mRNA-1	300.987	Conserved gene of unknown function
maker-pcu_contig_1642-fgenesh-gene-0.0-mRNA-1	1961.35	Nucleosome/chromatin assembly factor group
maker-pcu_contig_1642-snap-gene-0.2-mRNA-1	6.35381	Crinkler (CRN) family protein
maker-pcu_contig_1642-snap-gene-0.3-mRNA-1	256.577	Signal peptidase 12 kDa subunit
maker-pcu_contig_16437-snap-gene-0.0-mRNA-1	152.242	Histone demethylase
maker-pcu_contig_1644-snap-gene-0.1-mRNA-1	13.3377	Tryptophan synthase
maker-pcu_contig_1644-snap-gene-0.2-mRNA-1	284.303	AP-2 complex subunit mu
maker-pcu_contig_1644-snap-gene-0.3-mRNA-1	6.32738	Conserved gene of unknown function
maker-pcu_contig_1649-snap-gene-0.2-mRNA-1	535.941	Conserved gene of unknown function
maker-pcu_contig_165-fgenesh-gene-0.1-mRNA-1	15.759	TRNA pseudouridine synthase D (TruD)
maker-pcu_contig_165-snap-gene-0.10-mRNA-1	40.8576	Conserved gene of unknown function
maker-pcu_contig_165-snap-gene-0.11-mRNA-1	15.1067	Beta-lactamase
maker-pcu_contig_165-snap-gene-0.12-mRNA-1	4.73322	DNA repair protein RAD50
maker-pcu_contig_165-snap-gene-0.3-mRNA-1	4.07925	Always early
maker-pcu_contig_165-snap-gene-0.5-mRNA-1	53.7878	Conserved gene of unknown function
maker-pcu_contig_165-snap-gene-0.7-mRNA-1	22.7377	Protein OS-9
maker-pcu_contig_165-snap-gene-0.8-mRNA-1	72.6486	Myb-like DNA-binding protein
maker-pcu_contig_165-snap-gene-0.9-mRNA-1	15.7845	Conserved gene of unknown function
maker-pcu_contig_16517-snap-gene-0.1-mRNA-1	16.8975	Gene of unknown function
maker-pcu_contig_1652-snap-gene-0.1-mRNA-1	15.2761	ATP-binding Cassette (ABC) Superfamily
maker-pcu_contig_1653-snap-gene-0.2-mRNA-1	47.6516	Hypothetical leucine rich repeat protein
maker-pcu_contig_1653-snap-gene-0.3-mRNA-1	61.4791	Hypothetical leucine rich repeat protein
maker-pcu_contig_1654-snap-gene-0.3-mRNA-1	57.259	Folylpolyglutamate synthase
maker-pcu_contig_1654-snap-gene-0.4-mRNA-1	13.1882	Bardet-Biedl syndrome 7
maker-pcu_contig_1655-snap-gene-0.1-mRNA-1	22.2706	Kinesin
maker-pcu_contig_1655-snap-gene-0.2-mRNA-1	49.2233	Kinesin
maker-pcu_contig_1657-snap-gene-0.0-mRNA-1	297.336	Conserved gene of unknown function
maker-pcu_contig_1657-snap-gene-0.1-mRNA-1	66.2469	Conserved gene of unknown function
maker-pcu_contig_16581-snap-gene-0.0-mRNA-1	8.58948	Telomere length regulation protein TEL2
maker-pcu_contig_16582-fgenesh-gene-0.0-mRNA-1	67.4923	Gene of unknown function
maker-pcu_contig_1659-snap-gene-0.1-mRNA-1	34.4804	Conserved gene of unknown function
maker-pcu_contig_1659-snap-gene-0.2-mRNA-1	60.6178	Myosin XI
maker-pcu_contig_16596-snap-gene-0.0-mRNA-1	68.7765	Transmembrane protein
maker-pcu_contig_166-fgenesh-gene-0.5-mRNA-1	298.489	Glutamine synthetase
maker-pcu_contig_166-snap-gene-0.10-mRNA-1	4.14082	Uniprot|Q07878 Saccharomyces cerevisiae YLL040c VPS13
maker-pcu_contig_166-snap-gene-0.12-mRNA-1	46.5594	Conserved gene of unknown function
maker-pcu_contig_166-snap-gene-0.16-mRNA-1	8.5261	8-oxo-dGTPase
maker-pcu_contig_166-snap-gene-0.17-mRNA-1	214.198	Gene of unknown function
maker-pcu_contig_166-snap-gene-0.18-mRNA-1	42.4531	Conserved gene of unknown function
maker-pcu_contig_166-snap-gene-0.9-mRNA-1	21.7891	Amino Acid-Polyamine-Organocation (APC) Family
maker-pcu_contig_1661-snap-gene-0.1-mRNA-1	20.1169	Timing of CAB expression 1
maker-pcu_contig_1661-snap-gene-0.2-mRNA-1	4.75838	Gene of unknown function
maker-pcu_contig_1662-fgenesh-gene-0.0-mRNA-1	18.1857	DNA replication complex GINS protein PSF1
maker-pcu_contig_16660-snap-gene-0.0-mRNA-1	4.73835	Secreted RxLR effector peptide protein
maker-pcu_contig_1667-fgenesh-gene-0.0-mRNA-1	33.2124	Gene of unknown function
maker-pcu_contig_1667-snap-gene-0.4-mRNA-1	118.719	Conserved gene of unknown function
maker-pcu_contig_1667-snap-gene-0.5-mRNA-1	53.4786	Zgc:65893
maker-pcu_contig_1667-snap-gene-0.7-mRNA-1	29.2473	Conserved gene of unknown function
maker-pcu_contig_1669-snap-gene-0.1-mRNA-1	10.1603	Protein kinase
maker-pcu_contig_167-fgenesh-gene-0.0-mRNA-1	39.6688	Eukaryotic translation initiation factor 3 subunit C
maker-pcu_contig_167-fgenesh-gene-0.3-mRNA-1	153.806	Aspartyl protease family A01B
maker-pcu_contig_167-snap-gene-0.13-mRNA-1	261.519	Conserved gene of unknown function
maker-pcu_contig_167-snap-gene-0.16-mRNA-1	6.54808	Protein kinase domain containing protein
maker-pcu_contig_167-snap-gene-0.8-mRNA-1	181.906	F-box protein
maker-pcu_contig_167-snap-gene-0.9-mRNA-1	12.2817	Ankyrin
maker-pcu_contig_1672-snap-gene-0.1-mRNA-1	16.1169	Conserved gene of unknown function
maker-pcu_contig_1674-fgenesh-gene-0.1-mRNA-1	161.631	GTP-binding protein SAR1
maker-pcu_contig_1674-snap-gene-0.3-mRNA-1	27.5669	Protein kinase
maker-pcu_contig_1674-snap-gene-0.6-mRNA-1	22.2642	Vacuolar sorting protein SNF8
maker-pcu_contig_16766-snap-gene-0.1-mRNA-1	14.5673	GL21650
maker-pcu_contig_1677-fgenesh-gene-0.1-mRNA-1	126.586	Endo-1,3;1,4-beta-glucanase
maker-pcu_contig_1677-snap-gene-0.2-mRNA-1	20.8635	Aldehyde dehydrogenase family 7 member A1
maker-pcu_contig_1677-snap-gene-0.4-mRNA-1	11.9431	HECT E3 ubiquitin ligase
maker-pcu_contig_1677-snap-gene-0.5-mRNA-1	34.3289	NPP1
maker-pcu_contig_1678-snap-gene-0.1-mRNA-1	19.4516	H-or Na-translocating F-type, V-type and A-type ATPase (F-ATPase) Superfamily
maker-pcu_contig_1678-snap-gene-0.2-mRNA-1	14.8943	Peroxisomal Lon protease
maker-pcu_contig_16793-snap-gene-0.0-mRNA-1	4.3799	Conserved gene of unknown function
maker-pcu_contig_168-fgenesh-gene-0.0-mRNA-1	28.6143	Histone deacetylase
maker-pcu_contig_168-snap-gene-0.10-mRNA-1	5.55787	Endonuclease/exonuclease/phosphatase family protein
maker-pcu_contig_168-snap-gene-0.13-mRNA-1	9.41642	Craniofacial development protein 1
maker-pcu_contig_168-snap-gene-0.14-mRNA-1	8.60646	UPF0546 membrane protein
maker-pcu_contig_168-snap-gene-0.9-mRNA-1	7.57145	Protein kinase
maker-pcu_contig_16810-snap-gene-0.1-mRNA-1	9.63192	CRN domain-containing protein-containing protein
maker-pcu_contig_16811-snap-gene-0.0-mRNA-1	45.9246	Secreted RxLR effector peptide protein
maker-pcu_contig_1683-snap-gene-0.2-mRNA-1	53.8451	MRNA decapping enzyme
maker-pcu_contig_1683-snap-gene-0.3-mRNA-1	39.7342	Gene of unknown function
maker-pcu_contig_1683-snap-gene-0.4-mRNA-1	33.5387	M96 mating-specific protein family
maker-pcu_contig_1684-snap-gene-0.1-mRNA-1	40.1781	Palmitoyltransferase
maker-pcu_contig_1684-snap-gene-0.2-mRNA-1	42.1187	Endothelin-converting enzyme, metalloprotease family M13
maker-pcu_contig_16879-snap-gene-0.0-mRNA-1	20.6196	Necrosis-inducing
maker-pcu_contig_1688-snap-gene-0.1-mRNA-1	75.6459	RAS p21 protein activator 3
maker-pcu_contig_169-fgenesh-gene-0.1-mRNA-1	33.4321	Uracil phosphoribosyltransferase
maker-pcu_contig_169-snap-gene-0.11-mRNA-1	22.6546	Ubiquitin thioesterase OTU1
maker-pcu_contig_169-snap-gene-0.12-mRNA-1	11.5121	Major Facilitator Superfamily (MFS)
maker-pcu_contig_169-snap-gene-0.14-mRNA-1	45.5741	Voltage-gated Ion Channel (VIC) Superfamily
maker-pcu_contig_169-snap-gene-0.15-mRNA-1	6.93367	Lysophospholipid acyltransferase
maker-pcu_contig_169-snap-gene-0.6-mRNA-1	10.2123	Short chain dehydrogenase
maker-pcu_contig_169-snap-gene-0.7-mRNA-1	7.37741	Novel protein
maker-pcu_contig_169-snap-gene-0.8-mRNA-1	26.5068	Gene of unknown function
maker-pcu_contig_1690-fgenesh-gene-0.0-mRNA-1	17.8395	Contig An12c0060, complete genome
maker-pcu_contig_1690-snap-gene-0.3-mRNA-1	12.941	Conserved gene of unknown function
maker-pcu_contig_16936-snap-gene-0.0-mRNA-1	6.03907	Crinkler (CRN) family protein
maker-pcu_contig_16939-snap-gene-0.0-mRNA-1	19.7052	Transmembrane protein
maker-pcu_contig_1694-snap-gene-0.2-mRNA-1	6.07312	Vacuolar protein-sorting-associated protein
maker-pcu_contig_1694-snap-gene-0.3-mRNA-1	193.635	Conserved gene of unknown function
maker-pcu_contig_1694-snap-gene-0.4-mRNA-1	5.91426	Lipopolysaccharide-modifying enzyme
maker-pcu_contig_16946-snap-gene-0.1-mRNA-1	10.1153	Ribose-phosphate pyrophosphokinase
maker-pcu_contig_16951-snap-gene-0.0-mRNA-1	12.6308	ATP-binding Cassette (ABC) Superfamily
maker-pcu_contig_1697-snap-gene-0.1-mRNA-1	47.4195	Conserved gene of unknown function
maker-pcu_contig_1699-snap-gene-0.1-mRNA-1	127.23	5'-3' exoribonuclease 1
maker-pcu_contig_1699-snap-gene-0.2-mRNA-1	1409.23	Conserved gene of unknown function
maker-pcu_contig_17-fgenesh-gene-0.13-mRNA-1	22.5176	Conserved gene of unknown function
maker-pcu_contig_17-fgenesh-gene-0.6-mRNA-1	14.4409	Ferredoxin, 2Fe-2S
maker-pcu_contig_17-snap-gene-0.16-mRNA-1	138.651	Conserved gene of unknown function
maker-pcu_contig_17-snap-gene-0.17-mRNA-1	15.7383	Conserved gene of unknown function
maker-pcu_contig_17-snap-gene-0.18-mRNA-1	69.2721	Conserved gene of unknown function
maker-pcu_contig_17-snap-gene-0.19-mRNA-1	4.89793	Calmodulin-like myosin-light chain
maker-pcu_contig_17-snap-gene-0.21-mRNA-1	34.2681	Type II inositol-3,4-bisphosphate 4-phosphatase
maker-pcu_contig_17-snap-gene-0.23-mRNA-1	63.905	Conserved gene of unknown function
maker-pcu_contig_17-snap-gene-0.24-mRNA-1	4.67261	Tubulin-tyrosine ligase family
maker-pcu_contig_17-snap-gene-0.25-mRNA-1	20.2213	Transcription factor APFI
maker-pcu_contig_17-snap-gene-0.30-mRNA-1	183.513	Conserved gene of unknown function
maker-pcu_contig_17-snap-gene-0.31-mRNA-1	36.4222	Conserved gene of unknown function
maker-pcu_contig_17-snap-gene-0.32-mRNA-1	20.0512	6-phosphofructo-2-kinase/fructose-2, 6-biphosphatase
maker-pcu_contig_17-snap-gene-0.33-mRNA-1	15.5213	Guanylate cyclase
maker-pcu_contig_17-snap-gene-0.34-mRNA-1	45.7556	Conserved gene of unknown function
maker-pcu_contig_17-snap-gene-0.35-mRNA-1	39.6928	Dolichol-phosphate mannosyltransferase
maker-pcu_contig_17-snap-gene-0.37-mRNA-1	9.55015	Cardiolipin synthetase
maker-pcu_contig_17-snap-gene-0.38-mRNA-1	47.3193	Myosin
maker-pcu_contig_17-snap-gene-0.39-mRNA-1	5.56362	Pre-mRNA-splicing factor ATP-dependent RNA helicase PRP43
maker-pcu_contig_1703-snap-gene-0.1-mRNA-1	18.5141	Phosphoglycerate mutase
maker-pcu_contig_1704-snap-gene-0.1-mRNA-1	10.0153	Conserved gene of unknown function
maker-pcu_contig_1704-snap-gene-0.2-mRNA-1	19.1869	Conserved gene of unknown function
maker-pcu_contig_1704-snap-gene-0.3-mRNA-1	37.1198	GI15442
maker-pcu_contig_17045-fgenesh-gene-0.0-mRNA-1	61.3851	D-tyrosyl-tRNA(Tyr) deacylase
maker-pcu_contig_1706-snap-gene-0.1-mRNA-1	8.00016	Sphingosine kinase
maker-pcu_contig_1707-fgenesh-gene-0.0-mRNA-1	64.3253	Kinetochore protein Spc25
maker-pcu_contig_1707-snap-gene-0.4-mRNA-1	5.56116	Nucleic acid binding protein
maker-pcu_contig_17073-snap-gene-0.0-mRNA-1	73.9733	Conserved gene of unknown function
maker-pcu_contig_17077-snap-gene-0.0-mRNA-1	104.595	Gene of unknown function
maker-pcu_contig_17085-snap-gene-0.1-mRNA-1	67.2837	Conserved gene of unknown function
maker-pcu_contig_17088-snap-gene-0.0-mRNA-1	100.069	Gene of unknown function
maker-pcu_contig_171-fgenesh-gene-0.1-mRNA-1	74.734	Nuclear transcription factor Y subunit
maker-pcu_contig_171-fgenesh-gene-0.7-mRNA-1	51.4541	EF-1 guanine nucleotide exchange domain-containing protein
maker-pcu_contig_171-snap-gene-0.11-mRNA-1	24.6901	Conserved gene of unknown function
maker-pcu_contig_171-snap-gene-0.13-mRNA-1	41.3134	3-hydroxyisobutyrate dehydrogenase
maker-pcu_contig_171-snap-gene-0.15-mRNA-1	4.29692	Family with sequence similarity 86, member A
maker-pcu_contig_171-snap-gene-0.17-mRNA-1	40.1964	Hypothetical leucine rich repeat protein
maker-pcu_contig_171-snap-gene-0.18-mRNA-1	45.7774	Phosphatidylinositol-4-phosphate-5-kinase (Pi-PIPK-D9/GPCR-PIPK)
maker-pcu_contig_171-snap-gene-0.19-mRNA-1	18.3931	Serine protease family S09X
maker-pcu_contig_171-snap-gene-0.20-mRNA-1	8.80383	Dynein light chain flagellar outer dynein arm light chain LC1
maker-pcu_contig_171-snap-gene-0.8-mRNA-1	5.99646	Phospholipase D, Pi-PLD-like-1
maker-pcu_contig_1712-snap-gene-0.3-mRNA-1	4.71207	Pentatricopeptide repeat-containing protein
maker-pcu_contig_1714-snap-gene-0.1-mRNA-1	22.5475	ATP-binding Cassette (ABC) Superfamily
maker-pcu_contig_1716-snap-gene-0.1-mRNA-1	56.1088	Polycomb
maker-pcu_contig_1719-fgenesh-gene-0.0-mRNA-1	1069.66	Conserved gene of unknown function
maker-pcu_contig_1719-snap-gene-0.1-mRNA-1	1103.21	Membrane protein
maker-pcu_contig_1719-snap-gene-0.2-mRNA-1	41.6274	Gene of unknown function
maker-pcu_contig_1719-snap-gene-0.4-mRNA-1	107.984	Gene of unknown function
maker-pcu_contig_172-snap-gene-0.2-mRNA-1	61.2251	Voltage-gated Ion Channel (VIC) Superfamily
maker-pcu_contig_172-snap-gene-0.5-mRNA-1	9.65175	Cytochrome P450
maker-pcu_contig_172-snap-gene-0.6-mRNA-1	9.28269	Alpha-1,2-glucosyltransferase
maker-pcu_contig_172-snap-gene-0.7-mRNA-1	6.10162	Dynein heavy chain
maker-pcu_contig_1720-fgenesh-gene-0.1-mRNA-1	17.5344	Septum site-determining protein minD
maker-pcu_contig_17210-snap-gene-0.0-mRNA-1	55.3063	Vacuolar protein sorting-associated protein
maker-pcu_contig_17230-snap-gene-0.0-mRNA-1	6.60921	Conserved gene of unknown function
maker-pcu_contig_1726-snap-gene-0.0-mRNA-1	100.061	Conserved gene of unknown function
maker-pcu_contig_1726-snap-gene-0.1-mRNA-1	35.5702	EF-hand calcium-binding domain-containing protein 6
maker-pcu_contig_1729-snap-gene-0.1-mRNA-1	15.499	Gene of unknown function
maker-pcu_contig_1729-snap-gene-0.3-mRNA-1	191.909	ATP-binding Cassette (ABC) superfamily
maker-pcu_contig_173-fgenesh-gene-0.2-mRNA-1	45.926	30S ribosomal protein S15
[truncated: 6,256 more rows]
