# Supplementary material for: mRNA-Seq Analysis of the Pseudoperonospora cubensis Transcriptome During Cucumber (Cucumis sativus L.) Infection
Source: PLoS One. 2012 Apr 24;7(4):e35796. doi: 10.1371/journal.pone.0035796 (PMC3335787; doi:10.1371/journal.pone.0035796)
Supplement: Table S5 — Spearman rank correlations of log2 expression values between ribonucleic acid sequencing (mRNA-Seq) and microarray based expression profiles. (XLSX) [file pone.0035796.s008.xlsx]

## Sheet: Sheet1
Table S5. Spearman rank correlations of log2 expression values between ribonucleic acid sequencing (RNA-Seq) and microarray based expression profiles.
RNA-Seq library	Microarray experiment	SCC‡
1 dpi¶	2 dpi	0.19
1 dpi	3 dpi	0.12
2 dpi	2 dpi	0.32
2 dpi	3 dpi	0.24
3 dpi	3 dpi	0.29
3 dpi	4 dpi	0.41
4 dpi	3 dpi	0.61
4 dpi	4 dpi	0.76
4 dpi	5 dpi	0.47
6 dpi	5 dpi	0.64
8 dpi	5 dpi	0.37
Microarray expression profiles were obtained from time-course analyses of genes expressed in Solanum tuberosum during infection by Phytophthora infestans (Haas et al., 2009). Single copy orthologous genes between Pseudoperonospora cubensis (PCU) and Ph. infestans (PITG) were identified using OrthoMCL program. Log2 transformed expression values of genes present in both the RNA-seq (log2 fragments …
‡SCC, Spearman correlation coefficient
¶dpi, days post-infection
