# Supplementary material for: mRNA-Seq Analysis of the Pseudoperonospora cubensis Transcriptome During Cucumber (Cucumis sativus L.) Infection
Source: PLoS One. 2012 Apr 24;7(4):e35796. doi: 10.1371/journal.pone.0035796 (PMC3335787; doi:10.1371/journal.pone.0035796)
Supplement: Table S6 — List of modules (module 1 to 6) with their corresponding gene ID, putative function as determined by BLASTX searches against UniRef100 (E-value cutoff 1e-5) and transcription factor-related Pfam domains. (XLSX) [file pone.0035796.s009.xlsx]

## Sheet: Sheet1
Table S6. List of modules (module 1 to 6) with their corresponding gene ID, putative function as determined by BLASTX searches against UniRef100 (E-value cutoff 1e-5) and transcription factor-related Pfam domains.
Module	Gene ID	Putative Function	Transcription factor-related PF domain
Module 1	maker-pcu_contig_1012-fgenesh-gene-0.0-mRNA-1	TonB-dependent receptor	NA
Module 1	maker-pcu_contig_10301-snap-gene-0.1-mRNA-1	S-adenosylmethionine synthase 2	NA
Module 1	maker-pcu_contig_10478-snap-gene-0.1-mRNA-1	ATP synthase subunit beta	NA
Module 1	maker-pcu_contig_10777-snap-gene-0.0-mRNA-1	TRNA dimethylallyltransferase	NA
Module 1	maker-pcu_contig_10888-snap-gene-0.1-mRNA-1	6,7-dimethyl-8-ribityllumazine synthase	NA
Module 1	maker-pcu_contig_10985-snap-gene-0.0-mRNA-1	Conserved gene of unknown function	NA
Module 1	maker-pcu_contig_11082-snap-gene-0.1-mRNA-1	Fructose-bisphosphate aldolase	NA
Module 1	maker-pcu_contig_11377-snap-gene-0.0-mRNA-1	Elongation factor G	NA
Module 1	maker-pcu_contig_11422-snap-gene-0.1-mRNA-1	GTP-binding protein TypA	NA
Module 1	maker-pcu_contig_11485-snap-gene-0.1-mRNA-1	ATP synthase subunit beta	NA
Module 1	maker-pcu_contig_11517-snap-gene-0.1-mRNA-1	NADH dehydrogenase subunit B	NA
Module 1	maker-pcu_contig_11554-fgenesh-gene-0.0-mRNA-1	Major facilitator superfamily MFS_1	NA
Module 1	maker-pcu_contig_11880-fgenesh-gene-0.0-mRNA-1	Glucose-6-phosphate isomerase	NA
Module 1	maker-pcu_contig_11944-snap-gene-0.0-mRNA-1	Glyceraldehyde-3-phosphate dehydrogenase, type I	NA
Module 1	maker-pcu_contig_12069-fgenesh-gene-0.0-mRNA-1	Transcriptional regulator, LuxR family	PF00196(Transcription regulator LuxR, C-terminal)
Module 1	maker-pcu_contig_12136-snap-gene-0.1-mRNA-1	Peptidyl-prolyl cis-trans isomerase	NA
Module 1	maker-pcu_contig_12411-snap-gene-0.1-mRNA-1	NADH dehydrogenase subunit F	NA
Module 1	maker-pcu_contig_12563-snap-gene-0.0-mRNA-1	Chaperone protein dnaK	NA
Module 1	maker-pcu_contig_13143-snap-gene-0.1-mRNA-1	Threonine--tRNA ligase	NA
Module 1	maker-pcu_contig_13184-snap-gene-0.1-mRNA-1	Peptide chain release factor 3	NA
Module 1	maker-pcu_contig_13225-snap-gene-0.1-mRNA-1	Type VI secretion protein IcmF	NA
Module 1	maker-pcu_contig_1335-fgenesh-gene-0.0-mRNA-1	K potassium transporter	NA
Module 1	maker-pcu_contig_13664-snap-gene-0.1-mRNA-1	30S ribosomal protein S15	NA
Module 1	maker-pcu_contig_13664-snap-gene-0.2-mRNA-1	Polyribonucleotide nucleotidyltransferase	NA
Module 1	maker-pcu_contig_13688-snap-gene-0.1-mRNA-1	Protein recA	NA
Module 1	maker-pcu_contig_14450-fgenesh-gene-0.0-mRNA-1	Endoribonuclease L-PSP	NA
Module 1	maker-pcu_contig_14592-snap-gene-0.0-mRNA-1	UDP-3-O-[3-hydroxymyristoyl] N-acetylglucosamine deacetylase	NA
Module 1	maker-pcu_contig_14662-fgenesh-gene-0.0-mRNA-1	Electron transfer flavoprotein alpha subunit	NA
Module 1	maker-pcu_contig_14686-snap-gene-0.0-mRNA-1	Translation initiation factor IF-2	NA
Module 1	maker-pcu_contig_1502-snap-gene-0.2-mRNA-1	TonB-dependent siderophore receptor	NA
Module 1	maker-pcu_contig_15060-snap-gene-0.1-mRNA-1	Phosphoglycerate kinase	NA
Module 1	maker-pcu_contig_15121-fgenesh-gene-0.0-mRNA-1	3-oxoacyl-[acyl-carrier-protein] synthase I	NA
Module 1	maker-pcu_contig_1533-snap-gene-0.0-mRNA-1	Pirin domain protein	NA
Module 1	maker-pcu_contig_15479-snap-gene-0.0-mRNA-1	GTP-binding protein engB	NA
Module 1	maker-pcu_contig_15546-snap-gene-0.2-mRNA-1	Heat shock protein	NA
Module 1	maker-pcu_contig_16440-snap-gene-0.1-mRNA-1	Lysyl-tRNA synthetase	NA
Module 1	maker-pcu_contig_1685-fgenesh-gene-0.1-mRNA-1	Amino acid permease-associated region	NA
Module 1	maker-pcu_contig_16950-snap-gene-0.0-mRNA-1	Succinate dehydrogenase, flavoprotein subunit	NA
Module 1	maker-pcu_contig_17039-snap-gene-0.0-mRNA-1	Conserved gene of unknown function	NA
Module 1	maker-pcu_contig_17039-snap-gene-0.1-mRNA-1	Enolase	NA
Module 1	maker-pcu_contig_17192-fgenesh-gene-0.0-mRNA-1	Spermidine synthase	NA
Module 1	maker-pcu_contig_17216-snap-gene-0.1-mRNA-1	Polyribonucleotide nucleotidyltransferase	NA
Module 1	maker-pcu_contig_17287-fgenesh-gene-0.0-mRNA-1	Glutamine synthetase	NA
Module 1	maker-pcu_contig_17407-snap-gene-0.0-mRNA-1	Methionyl-tRNA synthetase	NA
Module 1	maker-pcu_contig_17672-fgenesh-gene-0.0-mRNA-1	Superoxide dismutase	NA
Module 1	maker-pcu_contig_17685-snap-gene-0.0-mRNA-1	Iojap family protein	NA
Module 1	maker-pcu_contig_17736-snap-gene-0.1-mRNA-1	Queuine tRNA-ribosyltransferase	NA
Module 1	maker-pcu_contig_17753-snap-gene-0.0-mRNA-1	Alanyl-tRNA synthetase	NA
Module 1	maker-pcu_contig_18103-snap-gene-0.0-mRNA-1	50S ribosomal protein L19	NA
Module 1	maker-pcu_contig_18163-snap-gene-0.0-mRNA-1	10 kDa chaperonin	NA
Module 1	maker-pcu_contig_18177-snap-gene-0.1-mRNA-1	Acetyl-CoA carboxylase	NA
Module 1	maker-pcu_contig_18387-snap-gene-0.0-mRNA-1	Translation initiation factor IF-3	NA
Module 1	maker-pcu_contig_18554-snap-gene-0.1-mRNA-1	TRNA-specific 2-thiouridylase mnmA	NA
Module 1	maker-pcu_contig_18562-snap-gene-0.1-mRNA-1	Aspartate ammonia-lyase	NA
Module 1	maker-pcu_contig_19083-snap-gene-0.1-mRNA-1	Phosphate acetyltransferase	NA
Module 1	maker-pcu_contig_1911-fgenesh-gene-0.1-mRNA-1	Threonine synthase	NA
Module 1	maker-pcu_contig_1948-fgenesh-gene-0.0-mRNA-1	TonB-dependent siderophore receptor	NA
Module 1	maker-pcu_contig_19998-snap-gene-0.1-mRNA-1	Translation initiation factor IF-2	NA
Module 1	maker-pcu_contig_20001-snap-gene-0.0-mRNA-1	Peptidyl-prolyl cis-trans isomerase	NA
Module 1	maker-pcu_contig_20368-fgenesh-gene-0.0-mRNA-1	Histone H3	NA
Module 1	maker-pcu_contig_20710-snap-gene-0.0-mRNA-1	Iron-sulfur cluster assembly protein	NA
Module 1	maker-pcu_contig_20712-snap-gene-0.0-mRNA-1	Inositol monophosphatase	NA
Module 1	maker-pcu_contig_20791-fgenesh-gene-0.0-mRNA-1	ABC transporter, ATP-binding protein	NA
Module 1	maker-pcu_contig_20856-snap-gene-0.1-mRNA-1	60 kDa chaperonin	NA
Module 1	maker-pcu_contig_20948-snap-gene-0.0-mRNA-1	Elongation factor G	NA
Module 1	maker-pcu_contig_21073-snap-gene-0.1-mRNA-1	Isoleucyl-tRNA synthetase	NA
Module 1	maker-pcu_contig_2118-fgenesh-gene-0.0-mRNA-1	PAS/PAC sensor signal transduction histidine kinase	NA
Module 1	maker-pcu_contig_21211-snap-gene-0.1-mRNA-1	ATP-dependent protease ATPase subunit HslU	NA
Module 1	maker-pcu_contig_2133-fgenesh-gene-0.1-mRNA-1	Serine protein kinase, PrkA	NA
Module 1	maker-pcu_contig_21550-snap-gene-0.0-mRNA-1	UDP-3-O-[3-hydroxymyristoyl] glucosamine N-acyltransferase	NA
Module 1	maker-pcu_contig_21699-snap-gene-0.1-mRNA-1	Pyruvate kinase	NA
Module 1	maker-pcu_contig_21751-snap-gene-0.1-mRNA-1	ATP-dependent Clp protease ATP-binding subunit ClpA	NA
Module 1	maker-pcu_contig_21776-snap-gene-0.0-mRNA-1	ATP-dependent Clp protease proteolytic subunit	NA
Module 1	maker-pcu_contig_21882-snap-gene-0.1-mRNA-1	Translation initiation factor IF-2	NA
Module 1	maker-pcu_contig_22934-snap-gene-0.1-mRNA-1	Adenylosuccinate synthetase	NA
Module 1	maker-pcu_contig_23364-snap-gene-0.0-mRNA-1	Undecaprenyl pyrophosphate synthetase	NA
Module 1	maker-pcu_contig_23535-snap-gene-0.0-mRNA-1	Thioredoxin-dependent thiol peroxidase	NA
Module 1	maker-pcu_contig_23788-snap-gene-0.1-mRNA-1	Acetate kinase	NA
Module 1	maker-pcu_contig_23857-snap-gene-0.0-mRNA-1	Cell division protein ftsZ	NA
Module 1	maker-pcu_contig_2406-fgenesh-gene-0.1-mRNA-1	Alanine racemase	NA
Module 1	maker-pcu_contig_2406-snap-gene-0.5-mRNA-1	Major facilitator superfamily MFS_1	NA
Module 1	maker-pcu_contig_24193-fgenesh-gene-0.0-mRNA-1	Oligopeptidase A	NA
Module 1	maker-pcu_contig_24608-snap-gene-0.0-mRNA-1	Chaperone protein dnaJ	NA
Module 1	maker-pcu_contig_25004-fgenesh-gene-0.0-mRNA-1	Histidine/lysine/arginine/ornithine transport system ATP-binding protein	NA
Module 1	maker-pcu_contig_25654-fgenesh-gene-0.0-mRNA-1	Chaperone protein dnaK	NA
Module 1	maker-pcu_contig_26126-snap-gene-0.0-mRNA-1	GTP-binding protein era homolog	NA
Module 1	maker-pcu_contig_2625-fgenesh-gene-0.0-mRNA-1	Heavy metal efflux pump, CzcA family	NA
Module 1	maker-pcu_contig_27071-snap-gene-0.1-mRNA-1	Cysteine desulfurase	NA
Module 1	maker-pcu_contig_27130-fgenesh-gene-0.0-mRNA-1	Cell division protein ftsZ	NA
Module 1	maker-pcu_contig_27433-fgenesh-gene-0.0-mRNA-1	Signal recognition particle protein	NA
Module 1	maker-pcu_contig_27836-snap-gene-0.0-mRNA-1	ATP synthase subunit alpha	NA
Module 1	maker-pcu_contig_28308-snap-gene-0.0-mRNA-1	Alpha-ketoglutarate decarboxylase	NA
Module 1	maker-pcu_contig_2900-snap-gene-0.2-mRNA-1	30S ribosomal protein S17	NA
Module 1	maker-pcu_contig_29011-snap-gene-0.0-mRNA-1	Sulfite reductase flavoprotein	NA
Module 1	maker-pcu_contig_30227-fgenesh-gene-0.0-mRNA-1	Leucyl-tRNA synthetase	NA
Module 1	maker-pcu_contig_3063-fgenesh-gene-0.1-mRNA-1	Diguanylate cyclase/phosphodiesterase with PAS/PAC sensor(S)	NA
Module 1	maker-pcu_contig_3080-fgenesh-gene-0.0-mRNA-1	Fmu (Sun) domain protein	NA
Module 1	maker-pcu_contig_3097-fgenesh-gene-0.0-mRNA-1	Histidyl-tRNA synthetase	NA
Module 1	maker-pcu_contig_3170-fgenesh-gene-0.1-mRNA-1	Endonuclease III	NA
Module 1	maker-pcu_contig_3174-snap-gene-0.0-mRNA-1	Sulfate ABC transporter, periplasmic sulfate-binding protein	NA
Module 1	maker-pcu_contig_31943-snap-gene-0.0-mRNA-1	ABC transporter, ATP-binding protein	NA
Module 1	maker-pcu_contig_32138-snap-gene-0.0-mRNA-1	Phosphoenolpyruvate-protein phosphotransferase	NA
Module 1	maker-pcu_contig_324-snap-gene-0.1-mRNA-1	Carbamoyl-phosphate synthase large subunit	NA
Module 1	maker-pcu_contig_32825-snap-gene-0.0-mRNA-1	Cysteine synthase A	NA
Module 1	maker-pcu_contig_33182-snap-gene-0.1-mRNA-1	ATP-dependent protease La	NA
Module 1	maker-pcu_contig_3325-snap-gene-0.1-mRNA-1	50S ribosomal protein L24	NA
Module 1	maker-pcu_contig_3325-snap-gene-0.8-mRNA-1	50S ribosomal protein L30	NA
Module 1	maker-pcu_contig_33457-snap-gene-0.0-mRNA-1	Isoleucyl-tRNA synthetase	NA
Module 1	maker-pcu_contig_3352-snap-gene-0.2-mRNA-1	Pyruvate carboxyltransferase	NA
Module 1	maker-pcu_contig_3360-snap-gene-0.2-mRNA-1	GTP-binding protein engA	NA
Module 1	maker-pcu_contig_3384-fgenesh-gene-0.0-mRNA-1	Binding-protein-dependent transport systems inner membrane component	NA
Module 1	maker-pcu_contig_3386-snap-gene-0.1-mRNA-1	Signal peptide protein	NA
Module 1	maker-pcu_contig_35538-fgenesh-gene-0.0-mRNA-1	Valine-tRNA ligase	NA
Module 1	maker-pcu_contig_356-snap-gene-0.7-mRNA-1	Phosphate ABC transporter, periplasmic phosphate-binding protein	NA
Module 1	maker-pcu_contig_4112-snap-gene-0.3-mRNA-1	L-carnitine dehydratase/bile acid-inducible protein F	NA
Module 1	maker-pcu_contig_479-snap-gene-0.5-mRNA-1	Type II secretion system protein E	NA
Module 1	maker-pcu_contig_5107-fgenesh-gene-0.0-mRNA-1	Twin-arginine translocation pathway signal	NA
Module 1	maker-pcu_contig_5125-snap-gene-0.0-mRNA-1	Aldo/keto reductase	NA
Module 1	maker-pcu_contig_5325-snap-gene-0.1-mRNA-1	RNA methyltransferase, TrmA family	NA
Module 1	maker-pcu_contig_5569-snap-gene-0.0-mRNA-1	50S ribosomal protein L11	NA
Module 1	maker-pcu_contig_5802-snap-gene-0.0-mRNA-1	ATP synthase subunit alpha	NA
Module 1	maker-pcu_contig_5931-snap-gene-0.0-mRNA-1	Conserved hypothetical protein	NA
Module 1	maker-pcu_contig_5999-fgenesh-gene-0.0-mRNA-1	PHA synthase	NA
Module 1	maker-pcu_contig_649-snap-gene-0.3-mRNA-1	Gene of unknown function	NA
Module 1	maker-pcu_contig_6490-snap-gene-0.2-mRNA-1	ATP synthase beta subunit	NA
Module 1	maker-pcu_contig_6617-snap-gene-0.1-mRNA-1	Heavy metal efflux pump, CzcA family	NA
Module 1	maker-pcu_contig_6697-snap-gene-0.1-mRNA-1	50S ribosomal protein L17	NA
Module 1	maker-pcu_contig_7206-snap-gene-0.1-mRNA-1	Peptidase S45 penicillin amidase	NA
Module 1	maker-pcu_contig_7434-snap-gene-0.0-mRNA-1	Inositol 2-dehydrogenase	NA
Module 1	maker-pcu_contig_7723-snap-gene-0.0-mRNA-1	50S ribosomal protein L4	NA
Module 1	maker-pcu_contig_796-fgenesh-gene-0.1-mRNA-1	Chaperone protein hscA homolog	NA
Module 1	maker-pcu_contig_8039-fgenesh-gene-0.0-mRNA-1	GAF sensor signal transduction histidine kinase	NA
Module 1	maker-pcu_contig_8134-fgenesh-gene-0.0-mRNA-1	Fe(3+)-pyochelin receptor	NA
Module 1	maker-pcu_contig_8234-fgenesh-gene-0.0-mRNA-1	Transcription-repair coupling factor	NA
Module 1	maker-pcu_contig_8370-snap-gene-0.1-mRNA-1	DL-methionine transporter ATP-binding subunit	NA
Module 1	maker-pcu_contig_838-snap-gene-0.2-mRNA-1	Secreted RxLR effector peptide protein	NA
Module 1	maker-pcu_contig_8785-snap-gene-0.1-mRNA-1	Polyribonucleotide nucleotidyltransferase	NA
Module 1	maker-pcu_contig_8785-snap-gene-0.2-mRNA-1	30S ribosomal protein S15	NA
Module 1	maker-pcu_contig_8865-snap-gene-0.1-mRNA-1	Translation elongation factor 2 (EF-2/EF-G)	NA
Module 1	maker-pcu_contig_8917-fgenesh-gene-0.0-mRNA-1	TonB-dependent siderophore receptor	PF04542(RNA polymerase sigma-70 region 2)
Module 1	maker-pcu_contig_9043-snap-gene-0.0-mRNA-1	3-oxoacyl-[acyl-carrier-protein] synthase II	NA
Module 1	maker-pcu_contig_9043-snap-gene-0.1-mRNA-1	3-oxoacyl-[acyl-carrier protein] reductase	NA
Module 1	maker-pcu_contig_9322-fgenesh-gene-0.0-mRNA-1	Histone H4	NA
Module 1	maker-pcu_contig_9366-snap-gene-0.0-mRNA-1	50S ribosomal protein L9	NA
Module 1	maker-pcu_contig_9428-snap-gene-0.0-mRNA-1	Phosphate ABC transporter, ATPase subunit	NA
Module 1	maker-pcu_contig_9999-snap-gene-0.0-mRNA-1	Ribosomal RNA large subunit methyltransferase E	NA
Module 2	maker-pcu_contig_1-snap-gene-0.30-mRNA-1	Conserved gene of unknown function	NA
Module 2	maker-pcu_contig_10-snap-gene-0.26-mRNA-1	Conserved gene of unknown function	NA
Module 2	maker-pcu_contig_10-snap-gene-0.27-mRNA-1	Mitochondrial Carrier (MC) Family	NA
Module 2	maker-pcu_contig_10064-snap-gene-0.0-mRNA-1	Regulator of chromosome condensation (RCC1)	NA
Module 2	maker-pcu_contig_10080-snap-gene-0.0-mRNA-1	Major Facilitator Superfamily (MFS)	NA
Module 2	maker-pcu_contig_101-snap-gene-0.12-mRNA-1	PAX-interacting protein 1	NA
Module 2	maker-pcu_contig_1017-snap-gene-0.1-mRNA-1	Kinesin	NA
Module 2	maker-pcu_contig_1017-snap-gene-0.2-mRNA-1	Conserved gene of unknown function	NA
Module 2	maker-pcu_contig_1019-snap-gene-0.2-mRNA-1	Conserved gene of unknown function	NA
Module 2	maker-pcu_contig_1026-snap-gene-0.0-mRNA-1	RCC1 and BTB domain-containing protein	NA
Module 2	maker-pcu_contig_10341-snap-gene-0.0-mRNA-1	Secreted RxLR effector peptide protein	NA
Module 2	maker-pcu_contig_1036-snap-gene-0.6-mRNA-1	Endo-beta-1,6-galactanase	NA
Module 2	maker-pcu_contig_1037-snap-gene-0.3-mRNA-1	Conserved gene of unknown function	NA
Module 2	maker-pcu_contig_10385-snap-gene-0.0-mRNA-1	Secreted RxLR effector peptide protein	NA
Module 2	maker-pcu_contig_10398-snap-gene-0.0-mRNA-1	Conserved gene of unknown function	NA
Module 2	maker-pcu_contig_104-snap-gene-0.19-mRNA-1	Programmed cell death protein 2	NA
Module 2	maker-pcu_contig_1043-snap-gene-0.1-mRNA-1	Cysteine protease family C48	NA
Module 2	maker-pcu_contig_105-fgenesh-gene-0.3-mRNA-1	Vacuolar protein sorting-associated protein	NA
Module 2	maker-pcu_contig_105-snap-gene-0.19-mRNA-1	Conserved gene of unknown function	NA
Module 2	maker-pcu_contig_1060-snap-gene-0.4-mRNA-1	Cxorf5 (71-7A) protein	NA
Module 2	maker-pcu_contig_1065-snap-gene-0.4-mRNA-1	Elicitor-like transglutaminase	NA
Module 2	maker-pcu_contig_1081-snap-gene-0.3-mRNA-1	Coiled-coil domain-containing protein 93	NA
Module 2	maker-pcu_contig_1087-snap-gene-0.2-mRNA-1	DEAD/DEAH box RNA helicase	NA
Module 2	maker-pcu_contig_1090-snap-gene-0.6-mRNA-1	EF-hand domain-containing protein	NA
Module 2	maker-pcu_contig_1091-snap-gene-0.3-mRNA-1	RabGAP/TBC domain-containing protein	NA
Module 2	maker-pcu_contig_1095-snap-gene-0.2-mRNA-1	Transposase	NA
Module 2	maker-pcu_contig_10998-snap-gene-0.0-mRNA-1	NPP1	NA
Module 2	maker-pcu_contig_11-snap-gene-0.13-mRNA-1	Liver stage antigen	NA
Module 2	maker-pcu_contig_11-snap-gene-0.14-mRNA-1	Glycoside-Pentoside-Hexuronide (GPH):Cation Symporter Family	NA
Module 2	maker-pcu_contig_11-snap-gene-0.25-mRNA-1	DENND4A protein	NA
Module 2	maker-pcu_contig_110-snap-gene-0.8-mRNA-1	ATP-binding Cassette (ABC) Superfamily	NA
Module 2	maker-pcu_contig_11190-snap-gene-0.0-mRNA-1	Phosphatidic acid phosphatase	NA
Module 2	maker-pcu_contig_1129-snap-gene-0.4-mRNA-1	TRNA-specific 2-thiouridylase mnmA	NA
Module 2	maker-pcu_contig_1129-snap-gene-0.5-mRNA-1	Conserved gene of unknown function	NA
Module 2	maker-pcu_contig_113-snap-gene-0.15-mRNA-1	Conserved gene of unknown function	NA
Module 2	maker-pcu_contig_113-snap-gene-0.20-mRNA-1	Conserved hypothetical protein	NA
Module 2	maker-pcu_contig_11348-snap-gene-0.0-mRNA-1	Glyceraldehyde-phosphate dehydrogenase	NA
Module 2	maker-pcu_contig_11376-snap-gene-0.1-mRNA-1	Flagella associated protein	NA
Module 2	maker-pcu_contig_1138-snap-gene-0.1-mRNA-1	Centrosomal protein 120	NA
Module 2	maker-pcu_contig_1167-snap-gene-0.4-mRNA-1	Protein MCM10 homolog	NA
Module 2	maker-pcu_contig_1167-snap-gene-0.6-mRNA-1	Conserved gene of unknown function	NA
Module 2	maker-pcu_contig_11707-snap-gene-0.0-mRNA-1	DNA ligase	NA
Module 2	maker-pcu_contig_118-snap-gene-0.12-mRNA-1	Conserved gene of unknown function	NA
Module 2	maker-pcu_contig_1182-snap-gene-0.7-mRNA-1	Conserved gene of unknown function	NA
Module 2	maker-pcu_contig_1199-snap-gene-0.1-mRNA-1	Pyridoxal-dependent decarboxylase	NA
Module 2	maker-pcu_contig_12-snap-gene-0.24-mRNA-1	Conserved gene of unknown function	NA
Module 2	maker-pcu_contig_120-snap-gene-0.14-mRNA-1	Novel protein (0610011L14Rik)	NA
Module 2	maker-pcu_contig_1201-snap-gene-0.2-mRNA-1	Kinesin K39	NA
Module 2	maker-pcu_contig_1204-snap-gene-0.2-mRNA-1	Conserved gene of unknown function	NA
Module 2	maker-pcu_contig_121-snap-gene-0.14-mRNA-1	Conserved gene of unknown function	NA
Module 2	maker-pcu_contig_121-snap-gene-0.8-mRNA-1	Conserved gene of unknown function	NA
Module 2	maker-pcu_contig_121-snap-gene-0.9-mRNA-1	Cell division cycle protein 48	NA
Module 2	maker-pcu_contig_1211-snap-gene-0.2-mRNA-1	Phosphatidate cytidylyltransferase	NA
Module 2	maker-pcu_contig_1211-snap-gene-0.3-mRNA-1	DJ-1	NA
Module 2	maker-pcu_contig_1216-snap-gene-0.5-mRNA-1	Guanine deaminase	NA
Module 2	maker-pcu_contig_12202-snap-gene-0.0-mRNA-1	NPP1	NA
Module 2	maker-pcu_contig_1223-snap-gene-0.1-mRNA-1	Conserved gene of unknown function	NA
Module 2	maker-pcu_contig_123-snap-gene-0.16-mRNA-1	N-acetyltransferase	NA
Module 2	maker-pcu_contig_1230-snap-gene-0.2-mRNA-1	Voltage-gated Ion Channel (VIC) Superfamily	NA
Module 2	maker-pcu_contig_12302-fgenesh-gene-0.0-mRNA-1	S-adenosylmethionine synthase	NA
Module 2	maker-pcu_contig_124-snap-gene-0.11-mRNA-1	Conserved gene of unknown function	NA
Module 2	maker-pcu_contig_124-snap-gene-0.22-mRNA-1	Abnormal X segregation	NA
Module 2	maker-pcu_contig_1249-snap-gene-0.4-mRNA-1	ADP-sugar pyrophosphatase	NA
Module 2	maker-pcu_contig_126-snap-gene-0.24-mRNA-1	Gene of unknown function	NA
Module 2	maker-pcu_contig_1266-snap-gene-0.3-mRNA-1	Conserved uncharacterized protein YaaA	NA
Module 2	maker-pcu_contig_1269-snap-gene-0.2-mRNA-1	RXLR effector family	NA
Module 2	maker-pcu_contig_12733-snap-gene-0.0-mRNA-1	Gene of unknown function	NA
Module 2	maker-pcu_contig_12815-snap-gene-0.0-mRNA-1	Sterol 3-beta-glucosyltransferase	NA
Module 2	maker-pcu_contig_1285-snap-gene-0.2-mRNA-1	Centrosomal protein 2	NA
Module 2	maker-pcu_contig_1285-snap-gene-0.4-mRNA-1	Phosphatidylinositol-4-phosphate-5-kinase (PIPK-D6/GPCR-PIPK)	NA
Module 2	maker-pcu_contig_129-fgenesh-gene-0.3-mRNA-1	GE15240	NA
Module 2	maker-pcu_contig_129-snap-gene-0.10-mRNA-1	Methionine aminopeptidase	NA
Module 2	maker-pcu_contig_129-snap-gene-0.12-mRNA-1	Conserved gene of unknown function	NA
Module 2	maker-pcu_contig_129-snap-gene-0.20-mRNA-1	Exonuclease mut-7 homolog	NA
Module 2	maker-pcu_contig_1292-snap-gene-0.3-mRNA-1	Beta-secretase	NA
Module 2	maker-pcu_contig_12997-snap-gene-0.0-mRNA-1	Secreted RxLR effector peptide protein	NA
Module 2	maker-pcu_contig_13-snap-gene-0.16-mRNA-1	UDP-N-acetylglucosamine-peptide N-acetylglucosaminyltransferase	NA
Module 2	maker-pcu_contig_13-snap-gene-0.26-mRNA-1	Possible ribosome assembly protein 4	NA
Module 2	maker-pcu_contig_13046-snap-gene-0.0-mRNA-1	Aldose 1-epimerase	NA
Module 2	maker-pcu_contig_13158-snap-gene-0.0-mRNA-1	Tyrosinase	NA
Module 2	maker-pcu_contig_132-snap-gene-0.14-mRNA-1	DNA repair protein XRCC3	NA
Module 2	maker-pcu_contig_1327-snap-gene-0.4-mRNA-1	GPI-anchored protein	NA
Module 2	maker-pcu_contig_133-snap-gene-0.13-mRNA-1	Brefeldin A-inhibited guanine nucleotide-exchange protein	NA
Module 2	maker-pcu_contig_1336-snap-gene-0.6-mRNA-1	Gene of unknown function	NA
Module 2	maker-pcu_contig_134-snap-gene-0.3-mRNA-1	Kinesin	NA
Module 2	maker-pcu_contig_1365-snap-gene-0.4-mRNA-1	Phosphatidylinositol kinase (PIK-I)	NA
Module 2	maker-pcu_contig_13659-snap-gene-0.0-mRNA-1	NPP1	NA
Module 2	maker-pcu_contig_137-snap-gene-0.14-mRNA-1	Nicotinate-nucleotide adenylyltransferase	NA
Module 2	maker-pcu_contig_139-snap-gene-0.11-mRNA-1	Conserved gene of unknown function	NA
Module 2	maker-pcu_contig_1390-snap-gene-0.2-mRNA-1	Cysteine synthase	NA
Module 2	maker-pcu_contig_13949-snap-gene-0.0-mRNA-1	Conserved gene of unknown function	NA
Module 2	maker-pcu_contig_14-snap-gene-0.23-mRNA-1	Conserved gene of unknown function	NA
Module 2	maker-pcu_contig_14092-snap-gene-0.0-mRNA-1	Conserved gene of unknown function	NA
Module 2	maker-pcu_contig_141-snap-gene-0.13-mRNA-1	Conserved gene of unknown function	NA
Module 2	maker-pcu_contig_142-snap-gene-0.9-mRNA-1	Ccdc45 protein	NA
Module 2	maker-pcu_contig_1425-fgenesh-gene-0.1-mRNA-1	Catalase-peroxidase	NA
Module 2	maker-pcu_contig_143-snap-gene-0.10-mRNA-1	Conserved gene of unknown function	NA
Module 2	maker-pcu_contig_143-snap-gene-0.4-mRNA-1	Conserved gene of unknown function	NA
Module 2	maker-pcu_contig_143-snap-gene-0.5-mRNA-1	Leucine Rich Repeat family protein	NA
Module 2	maker-pcu_contig_144-snap-gene-0.11-mRNA-1	Hyvh1 dual specificity phosphatase	NA
Module 2	maker-pcu_contig_1451-snap-gene-0.2-mRNA-1	Conserved gene of unknown function	NA
Module 2	maker-pcu_contig_14640-snap-gene-0.0-mRNA-1	Secreted RxLR effector peptide protein	NA
Module 2	maker-pcu_contig_147-snap-gene-0.7-mRNA-1	Microtubule binding protein	NA
Module 2	maker-pcu_contig_1473-snap-gene-0.4-mRNA-1	Kinesin	NA
Module 2	maker-pcu_contig_1476-snap-gene-0.2-mRNA-1	Ribonuclease	NA
Module 2	maker-pcu_contig_1480-snap-gene-0.4-mRNA-1	BolA-like 3 isoform 1	NA
Module 2	maker-pcu_contig_14864-snap-gene-0.0-mRNA-1	Secreted RxLR effector peptide protein	NA
Module 2	maker-pcu_contig_149-snap-gene-0.7-mRNA-1	Tigger transposable element derived 6	PF03221(Pogo transposase / Cenp-B / PDC2, subgroup, DNA-binding HTH domain)
Module 2	maker-pcu_contig_1495-snap-gene-0.1-mRNA-1	Conserved gene of unknown function	NA
Module 2	maker-pcu_contig_15033-snap-gene-0.0-mRNA-1	Conserved gene of unknown function	NA
Module 2	maker-pcu_contig_151-snap-gene-0.6-mRNA-1	Hect (homologous to the E6-AP (UBE3A) carboxyl terminus) domain and RCC1 (CHC1)-like domain (RLD) 2, partial	NA
Module 2	maker-pcu_contig_1510-snap-gene-0.8-mRNA-1	MORN repeat-containing protein	NA
Module 2	maker-pcu_contig_1511-snap-gene-0.2-mRNA-1	Conserved gene of unknown function	NA
Module 2	maker-pcu_contig_1514-fgenesh-gene-0.2-mRNA-1	60 kDa chaperonin	NA
Module 2	maker-pcu_contig_15161-snap-gene-0.0-mRNA-1	Crinkler (CRN) family protein	NA
Module 2	maker-pcu_contig_152-snap-gene-0.6-mRNA-1	Phosphomevalonate kinase	NA
Module 2	maker-pcu_contig_1524-snap-gene-0.5-mRNA-1	Conserved gene of unknown function	NA
Module 2	maker-pcu_contig_154-snap-gene-0.13-mRNA-1	Ion channel	NA
Module 2	maker-pcu_contig_154-snap-gene-0.16-mRNA-1	JmjC domain-containing protein 4	PF02373 (Transcription factor Jumonji)
Module 2	maker-pcu_contig_15462-snap-gene-0.0-mRNA-1	Malate dehydrogenase [NADP], chloroplastic	NA
Module 2	maker-pcu_contig_1548-snap-gene-0.1-mRNA-1	Gene of unknown function	NA
Module 2	maker-pcu_contig_1552-snap-gene-0.4-mRNA-1	Gene of unknown function	NA
Module 2	maker-pcu_contig_156-snap-gene-0.14-mRNA-1	Leucine rich repeat containing 48	NA
Module 2	maker-pcu_contig_156-snap-gene-0.6-mRNA-1	Conserved gene of unknown function	NA
Module 2	maker-pcu_contig_156-snap-gene-0.9-mRNA-1	Lipoprotein	NA
Module 2	maker-pcu_contig_1580-snap-gene-0.5-mRNA-1	Regulator of chromosome condensation (RCC1)	NA
Module 2	maker-pcu_contig_16-snap-gene-0.9-mRNA-1	Gene of unknown function	NA
Module 2	maker-pcu_contig_16099-snap-gene-0.1-mRNA-1	S-adenosylmethionine synthase	NA
Module 2	maker-pcu_contig_1614-snap-gene-0.2-mRNA-1	WD40 repeat-containing protein	NA
Module 2	maker-pcu_contig_1625-snap-gene-0.2-mRNA-1	EF hand family protein	NA
Module 2	maker-pcu_contig_163-snap-gene-0.5-mRNA-1	Gene of unknown function	NA
Module 2	maker-pcu_contig_1630-snap-gene-0.3-mRNA-1	Conserved gene of unknown function	NA
Module 2	maker-pcu_contig_1631-snap-gene-0.1-mRNA-1	KIAA1529.	NA
Module 2	maker-pcu_contig_16325-snap-gene-0.0-mRNA-1	Secreted RxLR effector peptide protein	NA
Module 2	maker-pcu_contig_1635-snap-gene-0.2-mRNA-1	IQ motif containing G	NA
Module 2	maker-pcu_contig_16386-snap-gene-0.0-mRNA-1	Gene of unknown function	NA
Module 2	maker-pcu_contig_164-snap-gene-0.0-mRNA-1	Serine proteinase inhibitor (KU family)	NA
Module 2	maker-pcu_contig_165-snap-gene-0.11-mRNA-1	Beta-lactamase	NA
Module 2	maker-pcu_contig_16506-snap-gene-0.0-mRNA-1	Secreted RxLR effector peptide protein	NA
Module 2	maker-pcu_contig_1655-snap-gene-0.1-mRNA-1	Kinesin	NA
Module 2	maker-pcu_contig_1657-snap-gene-0.0-mRNA-1	Conserved gene of unknown function	NA
Module 2	maker-pcu_contig_16592-snap-gene-0.0-mRNA-1	AlaT1	NA
Module 2	maker-pcu_contig_16766-snap-gene-0.1-mRNA-1	GL21650	NA
Module 2	maker-pcu_contig_168-snap-gene-0.11-mRNA-1	TPR repeat-containing protein	NA
Module 2	maker-pcu_contig_168-snap-gene-0.12-mRNA-1	Glycosyl transferase group 1	NA
Module 2	maker-pcu_contig_168-snap-gene-0.7-mRNA-1	Protein kinase	NA
Module 2	maker-pcu_contig_16867-snap-gene-0.0-mRNA-1	NPP1	NA
Module 2	maker-pcu_contig_17-snap-gene-0.19-mRNA-1	Calmodulin-like myosin-light chain	NA
Module 2	maker-pcu_contig_17-snap-gene-0.33-mRNA-1	Guanylate cyclase	NA
Module 2	maker-pcu_contig_17-snap-gene-0.34-mRNA-1	Conserved gene of unknown function	NA
Module 2	maker-pcu_contig_17045-fgenesh-gene-0.0-mRNA-1	D-tyrosyl-tRNA(Tyr) deacylase	NA
Module 2	maker-pcu_contig_1705-snap-gene-0.2-mRNA-1	Threonine aspartase	NA
Module 2	maker-pcu_contig_171-snap-gene-0.15-mRNA-1	Family with sequence similarity 86, member A	NA
Module 2	maker-pcu_contig_171-snap-gene-0.21-mRNA-1	Conserved gene of unknown function	NA
Module 2	maker-pcu_contig_1719-snap-gene-0.1-mRNA-1	Membrane protein	NA
Module 2	maker-pcu_contig_1727-snap-gene-0.1-mRNA-1	Conserved gene of unknown function	NA
Module 2	maker-pcu_contig_1729-snap-gene-0.3-mRNA-1	ATP-binding Cassette (ABC) superfamily	NA
Module 2	maker-pcu_contig_174-snap-gene-0.5-mRNA-1	Slowpoke-binding protein	NA
Module 2	maker-pcu_contig_17555-snap-gene-0.1-mRNA-1	Gene of unknown function	NA
Module 2	maker-pcu_contig_1756-snap-gene-0.1-mRNA-1	Phosphatidylinositol-4-phosphate-5-kinase (PIPK-D6/GPCR-PIPK)	NA
Module 2	maker-pcu_contig_176-snap-gene-0.8-mRNA-1	Phosphonoformate immuno-associated protein 5	NA
Module 2	maker-pcu_contig_177-snap-gene-0.9-mRNA-1	Capn7, partial	NA
Module 2	maker-pcu_contig_178-snap-gene-0.5-mRNA-1	Zinc finger, SWIM domain containing 2	NA
Module 2	maker-pcu_contig_1793-snap-gene-0.3-mRNA-1	DEAD/DEAH box RNA helicase	NA
Module 2	maker-pcu_contig_1794-snap-gene-0.2-mRNA-1	Phytanoyl-CoA dioxygenase	NA
Module 2	maker-pcu_contig_1803-snap-gene-0.2-mRNA-1	Glycoside hydrolase	NA
Module 2	maker-pcu_contig_1803-snap-gene-0.3-mRNA-1	Hypoxia-inducible factor 1 alpha inhibitor	NA
Module 2	maker-pcu_contig_18048-snap-gene-0.0-mRNA-1	Heat shock protein 70 (Hsp70)	NA
Module 2	maker-pcu_contig_1820-snap-gene-0.2-mRNA-1	Glycosyltransferase PglE	NA
Module 2	maker-pcu_contig_18366-snap-gene-0.0-mRNA-1	Necrosis-inducing	NA
Module 2	maker-pcu_contig_184-snap-gene-0.17-mRNA-1	Alr4619 protein	NA
Module 2	maker-pcu_contig_1843-snap-gene-0.2-mRNA-1	Conserved gene of unknown function	NA
Module 2	maker-pcu_contig_18465-snap-gene-0.0-mRNA-1	Thioredoxin reductase 1	NA
Module 2	maker-pcu_contig_18482-snap-gene-0.1-mRNA-1	Conserved gene of unknown function	NA
Module 2	maker-pcu_contig_1849-snap-gene-0.3-mRNA-1	Histone arginine demethylase	NA
Module 2	maker-pcu_contig_186-snap-gene-0.8-mRNA-1	Dimethyladenosine transferase	NA
Module 2	maker-pcu_contig_18662-snap-gene-0.0-mRNA-1	Aminomethyltransferase	NA
Module 2	maker-pcu_contig_188-snap-gene-0.11-mRNA-1	DNA repair protein	NA
Module 2	maker-pcu_contig_188-snap-gene-0.22-mRNA-1	RNA pseudouridylate synthase	NA
Module 2	maker-pcu_contig_1884-snap-gene-0.0-mRNA-1	Protein kinase	NA
Module 2	maker-pcu_contig_18948-snap-gene-0.0-mRNA-1	Calcineurin-like phosphoesterase	NA
Module 2	maker-pcu_contig_1901-snap-gene-0.4-mRNA-1	TRNA guanosine-2'-O-methyltransferase	NA
Module 2	maker-pcu_contig_1906-snap-gene-0.1-mRNA-1	M96 mating-specific protein family	NA
Module 2	maker-pcu_contig_194-snap-gene-0.6-mRNA-1	GAF domain-containing protein	NA
Module 2	maker-pcu_contig_1946-snap-gene-0.2-mRNA-1	Outer dense fiber protein 3	NA
Module 2	maker-pcu_contig_195-snap-gene-0.8-mRNA-1	Cell cycle protein cdc14	NA
Module 2	maker-pcu_contig_1963-snap-gene-0.7-mRNA-1	SCP-like extracellular protein	NA
Module 2	maker-pcu_contig_19648-snap-gene-0.0-mRNA-1	NPP1	NA
Module 2	maker-pcu_contig_197-snap-gene-0.16-mRNA-1	Gene of unknown function	NA
Module 2	maker-pcu_contig_2-snap-gene-0.37-mRNA-1	SHQ1 homolog (S. cerevisiae)	NA
Module 2	maker-pcu_contig_20-snap-gene-0.29-mRNA-1	Conserved gene of unknown function	NA
Module 2	maker-pcu_contig_20030-snap-gene-0.0-mRNA-1	Necrosis-inducing	NA
Module 2	maker-pcu_contig_202-snap-gene-0.21-mRNA-1	ADP-ribosylation factor	NA
Module 2	maker-pcu_contig_20455-snap-gene-0.0-mRNA-1	Sulfatase	NA
Module 2	maker-pcu_contig_20498-snap-gene-0.0-mRNA-1	Translation factor	NA
Module 2	maker-pcu_contig_2071-snap-gene-0.2-mRNA-1	Conserved gene of unknown function	NA
Module 2	maker-pcu_contig_20761-snap-gene-0.0-mRNA-1	Haustorium-specific membrane protein	NA
Module 2	maker-pcu_contig_20881-snap-gene-0.0-mRNA-1	NPP1	NA
Module 2	maker-pcu_contig_21-snap-gene-0.23-mRNA-1	Ankyrin	NA
Module 2	maker-pcu_contig_210-snap-gene-0.7-mRNA-1	Eyes absent family protein	NA
Module 2	maker-pcu_contig_210-snap-gene-0.9-mRNA-1	Amino Acid-Polyamine-Organocation (APC) Family	NA
Module 2	maker-pcu_contig_2113-snap-gene-0.1-mRNA-1	Mitochondrial protein	NA
Module 2	maker-pcu_contig_212-snap-gene-0.15-mRNA-1	DDDL1880	NA
Module 2	maker-pcu_contig_212-snap-gene-0.8-mRNA-1	Ankyrin repeat-rich vertebrate	NA
Module 2	maker-pcu_contig_2136-snap-gene-0.1-mRNA-1	Hydroxycinnamoyl CoA shikimate/quinate hydroxycinnamoyltransferase	NA
Module 2	maker-pcu_contig_21362-snap-gene-0.0-mRNA-1	Carbonic anhydrase	NA
Module 2	maker-pcu_contig_214-snap-gene-0.6-mRNA-1	Calmodulin	NA
Module 2	maker-pcu_contig_217-snap-gene-0.10-mRNA-1	Gene of unknown function	NA
Module 2	maker-pcu_contig_21891-snap-gene-0.0-mRNA-1	Transglutaminase elicitor	NA
Module 2	maker-pcu_contig_2199-snap-gene-0.2-mRNA-1	Tigger transposable element-derived protein 6	PF03221(Pogo transposase / Cenp-B / PDC2, subgroup, DNA-binding HTH domain)
Module 2	maker-pcu_contig_22-snap-gene-0.13-mRNA-1	Conserved gene of unknown function	NA
Module 2	maker-pcu_contig_22-snap-gene-0.26-mRNA-1	Cell division cycle protein 123	NA
Module 2	maker-pcu_contig_2209-snap-gene-0.2-mRNA-1	Conserved gene of unknown function	NA
Module 2	maker-pcu_contig_223-snap-gene-0.8-mRNA-1	Calcium-dependent protein kinase	NA
Module 2	maker-pcu_contig_22359-snap-gene-0.0-mRNA-1	Conserved gene of unknown function	NA
Module 2	maker-pcu_contig_224-snap-gene-0.8-mRNA-1	Calmodulin-binding WW domain protein	NA
Module 2	maker-pcu_contig_2261-snap-gene-0.2-mRNA-1	Conserved gene of unknown function	NA
Module 2	maker-pcu_contig_22657-snap-gene-0.0-mRNA-1	Secreted RxLR effector peptide protein	NA
Module 2	maker-pcu_contig_2271-snap-gene-0.4-mRNA-1	Conserved gene of unknown function	NA
Module 2	maker-pcu_contig_2272-snap-gene-0.1-mRNA-1	Conserved gene of unknown function	NA
Module 2	maker-pcu_contig_2274-snap-gene-0.1-mRNA-1	M96 mating-specific protein family	NA
Module 2	maker-pcu_contig_23037-snap-gene-0.0-mRNA-1	Aldose 1-epimerase	NA
Module 2	maker-pcu_contig_23167-fgenesh-gene-0.0-mRNA-1	Glycosyl transferase group 1	NA
Module 2	maker-pcu_contig_233-snap-gene-0.13-mRNA-1	Gene of unknown function	NA
Module 2	maker-pcu_contig_233-snap-gene-0.8-mRNA-1	Conserved gene of unknown function	NA
Module 2	maker-pcu_contig_234-snap-gene-0.18-mRNA-1	Conserved gene of unknown function	NA
Module 2	maker-pcu_contig_2344-snap-gene-0.3-mRNA-1	RXLR effector family	NA
Module 2	maker-pcu_contig_2363-snap-gene-0.2-mRNA-1	Pc22g21820 protein	NA
Module 2	maker-pcu_contig_2376-snap-gene-0.0-mRNA-1	Conserved gene of unknown function	NA
Module 2	maker-pcu_contig_243-snap-gene-0.23-mRNA-1	Helicase	NA
Module 2	maker-pcu_contig_24560-snap-gene-0.0-mRNA-1	Conserved gene of unknown function	NA
Module 2	maker-pcu_contig_246-snap-gene-0.13-mRNA-1	Conserved gene of unknown function	NA
Module 2	maker-pcu_contig_25-snap-gene-0.23-mRNA-1	Conserved gene of unknown function	NA
Module 2	maker-pcu_contig_25-snap-gene-0.34-mRNA-1	Conserved gene of unknown function	NA
Module 2	maker-pcu_contig_254-snap-gene-0.13-mRNA-1	Gene of unknown function	PF03221(Pogo transposase / Cenp-B / PDC2, subgroup, DNA-binding HTH domain)
Module 2	maker-pcu_contig_2572-snap-gene-0.1-mRNA-1	Conserved gene of unknown function	NA
Module 2	maker-pcu_contig_2589-snap-gene-0.2-mRNA-1	WD repeat domain 21	NA
Module 2	maker-pcu_contig_259-snap-gene-0.6-mRNA-1	Temporarily Assigned Gene name family member (tag-278) isoform 6	NA
Module 2	maker-pcu_contig_2592-snap-gene-0.0-mRNA-1	EF hand family protein	NA
Module 2	maker-pcu_contig_26-snap-gene-0.10-mRNA-1	Conserved gene of unknown function	NA
Module 2	maker-pcu_contig_26-snap-gene-0.11-mRNA-1	Titin	NA
Module 2	maker-pcu_contig_26-snap-gene-0.18-mRNA-1	Conserved gene of unknown function	NA
Module 2	maker-pcu_contig_2606-snap-gene-0.3-mRNA-1	Carbohydrate esterase	NA
Module 2	maker-pcu_contig_2619-snap-gene-0.2-mRNA-1	DTDP-D-glucose 4,6-dehydratase	NA
Module 2	maker-pcu_contig_265-snap-gene-0.10-mRNA-1	GRAM domain containing protein	NA
Module 2	maker-pcu_contig_267-snap-gene-0.6-mRNA-1	Cysteine protease family C02	NA
Module 2	maker-pcu_contig_269-snap-gene-0.9-mRNA-1	Dicarboxylate/amino acid:cation	NA
Module 2	maker-pcu_contig_2691-snap-gene-0.0-mRNA-1	Conserved gene of unknown function	NA
Module 2	maker-pcu_contig_27-snap-gene-0.15-mRNA-1	Conserved gene of unknown function	NA
Module 2	maker-pcu_contig_2720-snap-gene-0.0-mRNA-1	Conserved gene of unknown function	NA
Module 2	maker-pcu_contig_2748-snap-gene-0.0-mRNA-1	Leishmanolysin-like peptidase, metalloprotease family M08	NA
Module 2	maker-pcu_contig_27495-snap-gene-0.0-mRNA-1	Conserved gene of unknown function	NA
Module 2	maker-pcu_contig_27522-snap-gene-0.0-mRNA-1	Conserved gene of unknown function	NA
Module 2	maker-pcu_contig_27648-snap-gene-0.0-mRNA-1	Nucleoside diphosphate kinase	NA
Module 2	maker-pcu_contig_2781-snap-gene-0.1-mRNA-1	Viral A-type inclusion protein	NA
Module 2	maker-pcu_contig_283-snap-gene-0.6-mRNA-1	HIT zinc finger family protein	NA
Module 2	maker-pcu_contig_28351-snap-gene-0.0-mRNA-1	Sulfatase	NA
Module 2	maker-pcu_contig_28413-snap-gene-0.0-mRNA-1	Gene of unknown function	NA
Module 2	maker-pcu_contig_2854-snap-gene-0.1-mRNA-1	Myosin heavy chain	NA
Module 2	maker-pcu_contig_2861-snap-gene-0.2-mRNA-1	Nsun6 protein	NA
Module 2	maker-pcu_contig_28667-snap-gene-0.1-mRNA-1	Aldose 1-epimerase	NA
Module 2	maker-pcu_contig_289-snap-gene-0.10-mRNA-1	CMP/dCMP deaminase, zinc-binding	NA
Module 2	maker-pcu_contig_289-snap-gene-0.6-mRNA-1	Calcium-activated potassium channel subunit alpha-1	NA
Module 2	maker-pcu_contig_2897-snap-gene-0.0-mRNA-1	DUO pollen 3	NA
Module 2	maker-pcu_contig_2897-snap-gene-0.1-mRNA-1	Conserved gene of unknown function	NA
Module 2	maker-pcu_contig_29-snap-gene-0.15-mRNA-1	Outer Dynein Arm Docking Complex	NA
Module 2	maker-pcu_contig_291-snap-gene-0.9-mRNA-1	Conserved gene of unknown function	NA
Module 2	maker-pcu_contig_29387-snap-gene-0.0-mRNA-1	60S acidic ribosomal protein P1	NA
Module 2	maker-pcu_contig_295-snap-gene-0.6-mRNA-1	Flagellar associated protein	NA
Module 2	maker-pcu_contig_2953-snap-gene-0.1-mRNA-1	Contig An08c0280, complete genome	NA
Module 2	maker-pcu_contig_296-snap-gene-0.8-mRNA-1	Liver stage antigen	NA
Module 2	maker-pcu_contig_299-snap-gene-0.3-mRNA-1	Adenylate cyclase	NA
Module 2	maker-pcu_contig_2997-snap-gene-0.1-mRNA-1	Multicopper oxidase	NA
Module 2	maker-pcu_contig_3-snap-gene-0.36-mRNA-1	Sericin 2	NA
Module 2	maker-pcu_contig_30024-fgenesh-gene-0.0-mRNA-1	14-3-3 protein 2	NA
Module 2	maker-pcu_contig_30239-snap-gene-0.0-mRNA-1	Gene of unknown function	NA
Module 2	maker-pcu_contig_30422-snap-gene-0.0-mRNA-1	Necrosis and ethylene-inducing protein 1	NA
Module 2	maker-pcu_contig_307-snap-gene-0.9-mRNA-1	Protein fantom	NA
Module 2	maker-pcu_contig_308-fgenesh-gene-0.0-mRNA-1	S-adenosylmethionine synthase	NA
Module 2	maker-pcu_contig_309-snap-gene-0.4-mRNA-1	CG32113-PA, partial	NA
Module 2	maker-pcu_contig_3095-snap-gene-0.1-mRNA-1	D-isomer specific 2-hydroxyacid dehydrogenase	NA
Module 2	maker-pcu_contig_30974-snap-gene-0.0-mRNA-1	Pectinesterase	NA
Module 2	maker-pcu_contig_313-snap-gene-0.6-mRNA-1	Conserved gene of unknown function	NA
Module 2	maker-pcu_contig_315-snap-gene-0.17-mRNA-1	Mitochondrial Carrier (MC) Family	NA
Module 2	maker-pcu_contig_31504-snap-gene-0.0-mRNA-1	Aldose 1-epimerase	NA
Module 2	maker-pcu_contig_316-snap-gene-0.4-mRNA-1	Serine protease family S33	NA
Module 2	maker-pcu_contig_318-snap-gene-0.12-mRNA-1	Abnormal X segregation	NA
Module 2	maker-pcu_contig_318-snap-gene-0.20-mRNA-1	Conserved gene of unknown function	NA
Module 2	maker-pcu_contig_319-snap-gene-0.4-mRNA-1	DNA ligase	NA
Module 2	maker-pcu_contig_31961-snap-gene-0.0-mRNA-1	Gene of unknown function	NA
Module 2	maker-pcu_contig_32-snap-gene-0.25-mRNA-1	Serine protease family S26A	NA
Module 2	maker-pcu_contig_32-snap-gene-0.40-mRNA-1	RNA binding motif and ELMO/CED-12 domain 1	NA
Module 2	maker-pcu_contig_325-snap-gene-0.1-mRNA-1	Glucose-6-phosphate isomerase	NA
Module 2	maker-pcu_contig_326-snap-gene-0.7-mRNA-1	Leucine rich repeat containing 46	NA
Module 2	maker-pcu_contig_3285-snap-gene-0.0-mRNA-1	Protein kinase	NA
Module 2	maker-pcu_contig_33-snap-gene-0.15-mRNA-1	Vertebrate fibronectin type III domain containing protein family	NA
Module 2	maker-pcu_contig_330-snap-gene-0.10-mRNA-1	Conserved gene of unknown function	NA
Module 2	maker-pcu_contig_3300-snap-gene-0.0-mRNA-1	Conserved gene of unknown function	NA
Module 2	maker-pcu_contig_3302-snap-gene-0.0-mRNA-1	WD repeat protein 35	NA
Module 2	maker-pcu_contig_332-snap-gene-0.11-mRNA-1	Axonemal dynein intermediate chain protein	NA
Module 2	maker-pcu_contig_33348-snap-gene-0.0-mRNA-1	NPP1	NA
Module 2	maker-pcu_contig_334-snap-gene-0.7-mRNA-1	Histone acetyltransferase	NA
Module 2	maker-pcu_contig_3434-snap-gene-0.2-mRNA-1	Protein phophatase 2C	NA
Module 2	maker-pcu_contig_3455-snap-gene-0.4-mRNA-1	Appr-1-p processing domain protein	NA
Module 2	maker-pcu_contig_348-snap-gene-0.8-mRNA-1	Glucan 1,3-beta-glucosidase	NA
Module 2	maker-pcu_contig_350-snap-gene-0.2-mRNA-1	NUC156 family protein	NA
Module 2	maker-pcu_contig_35150-snap-gene-0.0-mRNA-1	Glucanase inhibitor protein	NA
Module 2	maker-pcu_contig_3539-snap-gene-0.2-mRNA-1	Gene of unknown function	NA
Module 2	maker-pcu_contig_354-snap-gene-0.6-mRNA-1	Sporangia induced dynein heavy chain	NA
Module 2	maker-pcu_contig_358-snap-gene-0.6-mRNA-1	Peroxisomal membrane MPV17/PMP22	NA
Module 2	maker-pcu_contig_358-snap-gene-0.8-mRNA-1	Protein with LSm motif. Putative LSm11	NA
Module 2	maker-pcu_contig_359-snap-gene-0.2-mRNA-1	Conserved gene of unknown function	NA
Module 2	maker-pcu_contig_3609-snap-gene-0.0-mRNA-1	RXLR effector family protein	NA
Module 2	maker-pcu_contig_3610-snap-gene-0.1-mRNA-1	Tyrosinase	NA
Module 2	maker-pcu_contig_3694-snap-gene-0.4-mRNA-1	Protein kinase	NA
Module 2	maker-pcu_contig_370-snap-gene-0.7-mRNA-1	Anoctamin	NA
Module 2	maker-pcu_contig_3729-snap-gene-0.0-mRNA-1	Sulfatase	NA
Module 2	maker-pcu_contig_373-snap-gene-0.8-mRNA-1	Pre-mRNA-splicing factor ATP-dependent RNA helicase	NA
Module 2	maker-pcu_contig_3747-snap-gene-0.1-mRNA-1	Conserved gene of unknown function	NA
Module 2	maker-pcu_contig_3761-snap-gene-0.1-mRNA-1	Lipase	NA
Module 2	maker-pcu_contig_3765-snap-gene-0.2-mRNA-1	Aldose 1-epimerase	NA
Module 2	maker-pcu_contig_3787-snap-gene-0.2-mRNA-1	Aminotransferase	NA
Module 2	maker-pcu_contig_3791-snap-gene-0.1-mRNA-1	Protein kinase	NA
Module 2	maker-pcu_contig_3810-snap-gene-0.2-mRNA-1	Conserved gene of unknown function	NA
Module 2	maker-pcu_contig_3928-snap-gene-0.1-mRNA-1	Conserved gene of unknown function	NA
Module 2	maker-pcu_contig_4-snap-gene-0.26-mRNA-1	Kinesin family member 1B isoform alpha	NA
Module 2	maker-pcu_contig_40-snap-gene-0.24-mRNA-1	Fibronectin type III domain-containing protein	NA
Module 2	maker-pcu_contig_40-snap-gene-0.25-mRNA-1	Aminotransferase, class V/Cysteine desulfurase	NA
Module 2	maker-pcu_contig_40-snap-gene-0.33-mRNA-1	Elongation factor G	NA
Module 2	maker-pcu_contig_400-snap-gene-0.3-mRNA-1	GI24011	NA
Module 2	maker-pcu_contig_4055-snap-gene-0.4-mRNA-1	Conserved gene of unknown function	NA
Module 2	maker-pcu_contig_4063-snap-gene-0.3-mRNA-1	Pseudouridylate synthase	NA
Module 2	maker-pcu_contig_409-snap-gene-0.6-mRNA-1	NPP1	NA
Module 2	maker-pcu_contig_412-snap-gene-0.15-mRNA-1	Peptidyl-prolyl cis-trans isomerase FKBP4, N-terminally processed	NA
Module 2	maker-pcu_contig_4151-snap-gene-0.0-mRNA-1	Tyrosine-protein phosphatase OCA1	NA
Module 2	maker-pcu_contig_419-snap-gene-0.3-mRNA-1	Dicarboxylate/amino acid:cation	NA
Module 2	maker-pcu_contig_419-snap-gene-0.5-mRNA-1	EF hand family protein	NA
Module 2	maker-pcu_contig_42-snap-gene-0.9-mRNA-1	Secreted RxLR effector peptide protein	NA
Module 2	maker-pcu_contig_4223-snap-gene-0.3-mRNA-1	Conserved gene of unknown function	NA
Module 2	maker-pcu_contig_424-snap-gene-0.4-mRNA-1	WD repeat protein 35	NA
Module 2	maker-pcu_contig_4268-snap-gene-0.0-mRNA-1	Regulator of chromosome condensation (RCC1)	NA
Module 2	maker-pcu_contig_4268-snap-gene-0.1-mRNA-1	Metalloprotease family M12A	NA
Module 2	maker-pcu_contig_4276-snap-gene-0.0-mRNA-1	CAMP-dependent protein kinase type I-beta regulatory subunit	NA
Module 2	maker-pcu_contig_43-snap-gene-0.6-mRNA-1	Conserved gene of unknown function	NA
Module 2	maker-pcu_contig_4327-snap-gene-0.5-mRNA-1	ATP-binding Cassette (ABC) Superfamily	NA
Module 2	maker-pcu_contig_438-snap-gene-0.6-mRNA-1	Transmembrane protein	NA
Module 2	maker-pcu_contig_442-snap-gene-0.8-mRNA-1	Choline transporter	NA
Module 2	maker-pcu_contig_445-snap-gene-0.6-mRNA-1	Conserved gene of unknown function	NA
Module 2	maker-pcu_contig_4456-snap-gene-0.0-mRNA-1	ATP-binding cassette sub-family F member 1	NA
Module 2	maker-pcu_contig_446-snap-gene-0.10-mRNA-1	Arginine N-methyltransferase	NA
Module 2	maker-pcu_contig_448-snap-gene-0.5-mRNA-1	Conserved gene of unknown function	NA
Module 2	maker-pcu_contig_451-snap-gene-0.9-mRNA-1	DNA ligase	NA
Module 2	maker-pcu_contig_4535-snap-gene-0.2-mRNA-1	Ammonium Transporter (Amt) Family	NA
Module 2	maker-pcu_contig_4551-snap-gene-0.0-mRNA-1	Liver stage antigen	NA
Module 2	maker-pcu_contig_457-snap-gene-0.3-mRNA-1	Paramyosin	NA
Module 2	maker-pcu_contig_464-snap-gene-0.4-mRNA-1	Calcium-transporting ATPase sarcoplasmic/endoplasmic reticulum type	NA
Module 2	maker-pcu_contig_468-snap-gene-0.18-mRNA-1	Conserved gene of unknown function	NA
Module 2	maker-pcu_contig_468-snap-gene-0.20-mRNA-1	Conserved gene of unknown function	NA
Module 2	maker-pcu_contig_4687-snap-gene-0.1-mRNA-1	Conserved gene of unknown function	NA
Module 2	maker-pcu_contig_472-snap-gene-0.5-mRNA-1	Zinc phosphodiesterase ELAC protein 2	NA
Module 2	maker-pcu_contig_474-snap-gene-0.2-mRNA-1	Lactation elevated protein 1	NA
Module 2	maker-pcu_contig_475-snap-gene-0.2-mRNA-1	Transmembrane protein	NA
Module 2	maker-pcu_contig_4797-snap-gene-0.0-mRNA-1	6-pyruvoyl tetrahydropterin synthase	NA
Module 2	maker-pcu_contig_48-snap-gene-0.11-mRNA-1	Metalloprotease family M67C	NA
Module 2	maker-pcu_contig_48-snap-gene-0.16-mRNA-1	Conserved gene of unknown function	NA
Module 2	maker-pcu_contig_482-snap-gene-0.11-mRNA-1	DNA mismatch repair protein	NA
Module 2	maker-pcu_contig_482-snap-gene-0.6-mRNA-1	Folate-Biopterin Transporter (FBT) Family	NA
Module 2	maker-pcu_contig_487-snap-gene-0.2-mRNA-1	Elongation factor Tu	NA
Module 2	maker-pcu_contig_493-snap-gene-0.8-mRNA-1	Endonuclease/exonuclease/phosphatase family protein	NA
Module 2	maker-pcu_contig_495-fgenesh-gene-0.3-mRNA-1	Ly1 antibody reactive clone	NA
Module 2	maker-pcu_contig_496-snap-gene-0.3-mRNA-1	Liver stage antigen	NA
Module 2	maker-pcu_contig_4998-snap-gene-0.1-mRNA-1	GA11633-PA	NA
Module 2	maker-pcu_contig_500-snap-gene-0.3-mRNA-1	Transmembrane protein	NA
Module 2	maker-pcu_contig_5012-snap-gene-0.0-mRNA-1	Glucanase inhibitor protein 2	NA
Module 2	maker-pcu_contig_503-snap-gene-0.7-mRNA-1	ATP-binding Cassette (ABC) Superfamily	NA
Module 2	maker-pcu_contig_5041-snap-gene-0.1-mRNA-1	RXLR effector family protein	NA
Module 2	maker-pcu_contig_506-snap-gene-0.8-mRNA-1	Tenascin	NA
Module 2	maker-pcu_contig_5061-snap-gene-0.1-mRNA-1	CorA Metal Ion Transporter (MIT) Family	NA
Module 2	maker-pcu_contig_511-snap-gene-0.5-mRNA-1	Riboflavin synthase subunit alpha	NA
Module 2	maker-pcu_contig_512-snap-gene-0.12-mRNA-1	RRNA methyltransferase	NA
Module 2	maker-pcu_contig_523-snap-gene-0.8-mRNA-1	Conserved gene of unknown function	NA
Module 2	maker-pcu_contig_524-snap-gene-0.7-mRNA-1	Conserved gene of unknown function	NA
Module 2	maker-pcu_contig_5312-snap-gene-0.0-mRNA-1	Conserved gene of unknown function	NA
Module 2	maker-pcu_contig_533-snap-gene-0.2-mRNA-1	WD repeat-containing protein 53 homolog	NA
Module 2	maker-pcu_contig_5367-snap-gene-0.0-mRNA-1	Aldose 1-epimerase	NA
Module 2	maker-pcu_contig_5405-snap-gene-0.0-mRNA-1	Gene of unknown function	NA
Module 2	maker-pcu_contig_541-snap-gene-0.8-mRNA-1	Conserved gene of unknown function	NA
Module 2	maker-pcu_contig_541-snap-gene-0.9-mRNA-1	Conserved gene of unknown function	NA
Module 2	maker-pcu_contig_5415-snap-gene-0.1-mRNA-1	3'-5' exonuclease domain protein	NA
Module 2	maker-pcu_contig_552-snap-gene-0.2-mRNA-1	Conserved gene of unknown function	NA
Module 2	maker-pcu_contig_554-snap-gene-0.7-mRNA-1	Cell cycle checkpoint protein RAD17	NA
Module 2	maker-pcu_contig_557-snap-gene-0.2-mRNA-1	Cysteine desulfurase	NA
Module 2	maker-pcu_contig_5575-snap-gene-0.0-mRNA-1	Myosin	NA
Module 2	maker-pcu_contig_561-fgenesh-gene-0.1-mRNA-1	Meiosis-specific nuclear structural 1	NA
Module 2	maker-pcu_contig_5706-snap-gene-0.1-mRNA-1	Tyrosinase	NA
Module 2	maker-pcu_contig_5707-snap-gene-0.0-mRNA-1	Clathrin coat assembly protein ap19	NA
Module 2	maker-pcu_contig_5713-snap-gene-0.3-mRNA-1	Crinkler (CRN) family protein	NA
Module 2	maker-pcu_contig_575-snap-gene-0.6-mRNA-1	Kinesin	NA
Module 2	maker-pcu_contig_579-snap-gene-0.10-mRNA-1	Calcineurin-like phosphoesterase	NA
Module 2	maker-pcu_contig_586-snap-gene-0.6-mRNA-1	Conserved domain protein	NA
Module 2	maker-pcu_contig_588-snap-gene-0.5-mRNA-1	Kinesin K39	NA
Module 2	maker-pcu_contig_5916-snap-gene-0.3-mRNA-1	Telomere length regulation protein TEL2	NA
Module 2	maker-pcu_contig_599-snap-gene-0.2-mRNA-1	Transmembrane protein	NA
Module 2	maker-pcu_contig_599-snap-gene-0.3-mRNA-1	MYB4R1	NA
Module 2	maker-pcu_contig_6-snap-gene-0.19-mRNA-1	Conserved gene of unknown function	NA
Module 2	maker-pcu_contig_60-snap-gene-0.7-mRNA-1	RNA exonuclease 4	NA
Module 2	maker-pcu_contig_601-snap-gene-0.2-mRNA-1	Transmembrane protein	NA
Module 2	maker-pcu_contig_605-snap-gene-0.6-mRNA-1	Conserved gene of unknown function	NA
Module 2	maker-pcu_contig_605-snap-gene-0.8-mRNA-1	Conserved gene of unknown function	NA
Module 2	maker-pcu_contig_6070-snap-gene-0.0-mRNA-1	Dicarboxylate/amino acid:cation	NA
Module 2	maker-pcu_contig_612-snap-gene-0.2-mRNA-1	Transmembrane protein	NA
Module 2	maker-pcu_contig_621-snap-gene-0.10-mRNA-1	CG34146-PA	NA
Module 2	maker-pcu_contig_6216-snap-gene-0.0-mRNA-1	Transmembrane protein	NA
Module 2	maker-pcu_contig_624-snap-gene-0.4-mRNA-1	Kinetochore protein mis18	NA
Module 2	maker-pcu_contig_633-snap-gene-0.0-mRNA-1	Oxidoreductase	NA
Module 2	maker-pcu_contig_638-snap-gene-0.1-mRNA-1	Conserved gene of unknown function	NA
Module 2	maker-pcu_contig_638-snap-gene-0.4-mRNA-1	Conserved gene of unknown function	NA
Module 2	maker-pcu_contig_639-snap-gene-0.1-mRNA-1	Adherance factor	NA
Module 2	maker-pcu_contig_6393-snap-gene-0.0-mRNA-1	Cytosolic endo-beta-N-acetylglucosaminidase	NA
Module 2	maker-pcu_contig_64-snap-gene-0.16-mRNA-1	Hypothetical leucine rich repeat calmodulin binding protein	NA
Module 2	maker-pcu_contig_640-snap-gene-0.1-mRNA-1	Tyrosinase	NA
Module 2	maker-pcu_contig_641-snap-gene-0.8-mRNA-1	A/G-specific adenine DNA glycosylase	NA
Module 2	maker-pcu_contig_643-snap-gene-0.6-mRNA-1	Conserved hypothetical protein-like isoform 1	NA
Module 2	maker-pcu_contig_6489-snap-gene-0.2-mRNA-1	Lysosomal acid lipase/cholesteryl ester hydrolase	NA
Module 2	maker-pcu_contig_6492-snap-gene-0.0-mRNA-1	Aldose 1-epimerase	NA
Module 2	maker-pcu_contig_65-snap-gene-0.9-mRNA-1	Myotubularin	NA
Module 2	maker-pcu_contig_656-snap-gene-0.2-mRNA-1	Conserved gene of unknown function	NA
Module 2	maker-pcu_contig_6561-snap-gene-0.0-mRNA-1	Conserved gene of unknown function	NA
Module 2	maker-pcu_contig_664-snap-gene-0.6-mRNA-1	Gene of unknown function	NA
Module 2	maker-pcu_contig_6642-snap-gene-0.0-mRNA-1	Conserved gene of unknown function	NA
Module 2	maker-pcu_contig_67-snap-gene-0.19-mRNA-1	Blue cheese CG14001-PA	NA
Module 2	maker-pcu_contig_67-snap-gene-0.9-mRNA-1	Leishmanolysin-like peptidase	NA
Module 2	maker-pcu_contig_670-snap-gene-0.5-mRNA-1	Myosin Va	NA
Module 2	maker-pcu_contig_671-snap-gene-0.7-mRNA-1	Conserved gene of unknown function	NA
Module 2	maker-pcu_contig_675-snap-gene-0.10-mRNA-1	Transmembrane protein	NA
Module 2	maker-pcu_contig_678-snap-gene-0.6-mRNA-1	SET domain containing protein	NA
Module 2	maker-pcu_contig_68-snap-gene-0.19-mRNA-1	Conserved gene of unknown function	NA
Module 2	maker-pcu_contig_685-snap-gene-0.3-mRNA-1	Conserved gene of unknown function	NA
Module 2	maker-pcu_contig_686-snap-gene-0.8-mRNA-1	General transcription factor 3C polypeptide 4	NA
Module 2	maker-pcu_contig_6891-snap-gene-0.0-mRNA-1	Secreted RxLR effector peptide protein	NA
Module 2	maker-pcu_contig_694-snap-gene-0.5-mRNA-1	Regulator of chromosome condensation RCC1	NA
Module 2	maker-pcu_contig_697-snap-gene-0.5-mRNA-1	Serine protease family S10	NA
Module 2	maker-pcu_contig_699-snap-gene-0.11-mRNA-1	MGC89050 protein isoform 2	NA
Module 2	maker-pcu_contig_7-snap-gene-0.35-mRNA-1	Ankyrin repeat, PH and SEC7 domain containing protein secG	NA
Module 2	maker-pcu_contig_7069-snap-gene-0.1-mRNA-1	GTP-dependent nucleic acid-binding protein engD	NA
Module 2	maker-pcu_contig_71-snap-gene-0.22-mRNA-1	Voltage-gated Ion Channel (VIC) Superfamily	NA
Module 2	maker-pcu_contig_7173-snap-gene-0.2-mRNA-1	Conserved gene of unknown function	NA
Module 2	maker-pcu_contig_718-snap-gene-0.5-mRNA-1	Protein kinase (ISS)	NA
Module 2	maker-pcu_contig_747-snap-gene-0.7-mRNA-1	(Fragment)	NA
Module 2	maker-pcu_contig_7498-snap-gene-0.0-mRNA-1	Conserved gene of unknown function	NA
Module 2	maker-pcu_contig_75-snap-gene-0.8-mRNA-1	Liver stage antigen	NA
Module 2	maker-pcu_contig_750-snap-gene-0.6-mRNA-1	Ubiquitin carboxyl-terminal hydrolase	NA
Module 2	maker-pcu_contig_7511-snap-gene-0.0-mRNA-1	Asparagine synthetase domain-containing protein	NA
Module 2	maker-pcu_contig_7588-snap-gene-0.0-mRNA-1	Serine hydrolase (FSH1)	NA
Module 2	maker-pcu_contig_759-snap-gene-0.7-mRNA-1	Putative	NA
Module 2	maker-pcu_contig_765-snap-gene-0.4-mRNA-1	Conserved gene of unknown function	NA
Module 2	maker-pcu_contig_779-snap-gene-0.8-mRNA-1	Telomerase reverse transcriptase	NA
Module 2	maker-pcu_contig_7840-snap-gene-0.0-mRNA-1	ATP-binding Cassette (ABC) superfamily	NA
Module 2	maker-pcu_contig_797-snap-gene-0.2-mRNA-1	Polysaccharide lyase	NA
Module 2	maker-pcu_contig_8-snap-gene-0.30-mRNA-1	Neutral ceramidase	NA
Module 2	maker-pcu_contig_803-snap-gene-0.8-mRNA-1	Glycosyl transferase family 2 protein	NA
Module 2	maker-pcu_contig_805-snap-gene-0.4-mRNA-1	Gene of unknown function	NA
Module 2	maker-pcu_contig_8090-fgenesh-gene-0.0-mRNA-1	Glycoside hydrolase	NA
Module 2	maker-pcu_contig_81-snap-gene-0.10-mRNA-1	Flagella associated protein	NA
Module 2	maker-pcu_contig_819-snap-gene-0.4-mRNA-1	Lipoprotein	NA
Module 2	maker-pcu_contig_82-snap-gene-0.24-mRNA-1	3' exoribonuclease family, domain 1 containing protein	NA
Module 2	maker-pcu_contig_822-snap-gene-0.5-mRNA-1	Conserved gene of unknown function	NA
Module 2	maker-pcu_contig_83-snap-gene-0.15-mRNA-1	TSEN2 protein	NA
Module 2	maker-pcu_contig_8445-snap-gene-0.0-mRNA-1	Regulator of chromosome condensation (RCC1)	NA
Module 2	maker-pcu_contig_85-snap-gene-0.17-mRNA-1	Enoyl-CoA hydratase domain-containing protein 1	NA
Module 2	maker-pcu_contig_851-fgenesh-gene-0.0-mRNA-1	HSF-type DNA-binding protein	PF00447(Heat shock factor (HSF)-type, DNA-binding)
Module 2	maker-pcu_contig_8644-snap-gene-0.0-mRNA-1	Serine hydroxymethyltransferase	NA
Module 2	maker-pcu_contig_868-snap-gene-0.7-mRNA-1	Phosphatidylinositol-4-phosphate binding protein	NA
Module 2	maker-pcu_contig_871-snap-gene-0.2-mRNA-1	M96 mating-specific protein family	NA
Module 2	maker-pcu_contig_872-snap-gene-0.4-mRNA-1	Conserved gene of unknown function	NA
Module 2	maker-pcu_contig_886-snap-gene-0.7-mRNA-1	DNA directed RNA polymerase II subunit, 8.2kDa, rpb10	NA
Module 2	maker-pcu_contig_898-snap-gene-0.2-mRNA-1	GRAM domain containing protein	NA
Module 2	maker-pcu_contig_9-fgenesh-gene-0.12-mRNA-1	DEAD/DEAH box RNA helicase	NA
Module 2	maker-pcu_contig_9-snap-gene-0.24-mRNA-1	Fimbrin-like potential actin filament bundling protein	NA
Module 2	maker-pcu_contig_9-snap-gene-0.47-mRNA-1	PP-loop family protein	NA
Module 2	maker-pcu_contig_90-snap-gene-0.20-mRNA-1	Gene of unknown function	NA
Module 2	maker-pcu_contig_9018-snap-gene-0.1-mRNA-1	Conserved gene of unknown function	NA
Module 2	maker-pcu_contig_903-snap-gene-0.1-mRNA-1	Phosphatidylinositol kinase (PIK-5)	NA
Module 2	maker-pcu_contig_9082-snap-gene-0.1-mRNA-1	Conserved gene of unknown function	NA
Module 2	maker-pcu_contig_9128-snap-gene-0.0-mRNA-1	Acetyl-CoA acetyltransferase, cytosolic 2	NA
Module 2	maker-pcu_contig_923-snap-gene-0.4-mRNA-1	Conserved gene of unknown function	NA
Module 2	maker-pcu_contig_923-snap-gene-0.6-mRNA-1	Autophagy protein 16	NA
Module 2	maker-pcu_contig_9282-snap-gene-0.1-mRNA-1	Testis intracellular mediator protein	NA
Module 2	maker-pcu_contig_933-snap-gene-0.7-mRNA-1	FHA domain containing protein	NA
Module 2	maker-pcu_contig_9373-snap-gene-0.0-mRNA-1	MtN3	NA
Module 2	maker-pcu_contig_9378-snap-gene-0.0-mRNA-1	Transmembrane protein	NA
Module 2	maker-pcu_contig_94-snap-gene-0.17-mRNA-1	Dynein heavy chain	NA
Module 2	maker-pcu_contig_9446-snap-gene-0.1-mRNA-1	Nuclear ribonuclease Z	NA
Module 2	maker-pcu_contig_945-snap-gene-0.7-mRNA-1	Protein lin-54	NA
Module 2	maker-pcu_contig_946-snap-gene-0.7-mRNA-1	Glycoside hydrolase	NA
Module 2	maker-pcu_contig_951-snap-gene-0.3-mRNA-1	KIAA0556 protein-like, partial	NA
Module 2	maker-pcu_contig_952-snap-gene-0.3-mRNA-1	GL19383	NA
Module 2	maker-pcu_contig_957-snap-gene-0.11-mRNA-1	Gluthathione S-transferase theta	NA
Module 2	maker-pcu_contig_958-snap-gene-0.2-mRNA-1	Transmembrane protein	NA
Module 2	maker-pcu_contig_97-snap-gene-0.8-mRNA-1	Conserved gene of unknown function	NA
Module 2	maker-pcu_contig_971-snap-gene-0.6-mRNA-1	Possible LRR calcium-binding protein	NA
Module 2	maker-pcu_contig_98-snap-gene-0.15-mRNA-1	D-2-hydroxyglutarate dehydrogenase, partial	PF00096(Zinc finger, C2H2-type)
Module 2	maker-pcu_contig_98-snap-gene-0.17-mRNA-1	Mitogen-activated protein kinase kinase kinase	NA
Module 2	maker-pcu_contig_9854-snap-gene-0.2-mRNA-1	Gene of unknown function	NA
Module 2	maker-pcu_contig_99-snap-gene-0.10-mRNA-1	Phosphatidylinositol kinase	NA
Module 2	maker-pcu_contig_9916-snap-gene-0.0-mRNA-1	Glycosyl transferase, group 1 family protein	NA
Module 2	maker-pcu_contig_9973-snap-gene-0.0-mRNA-1	Conserved gene of unknown function	NA
Module 2	maker-pcu_contig_999-snap-gene-0.5-mRNA-1	Protein kinase	NA
Module 3	maker-pcu_contig_1011-snap-gene-0.3-mRNA-1	Protein kinase	NA
Module 3	maker-pcu_contig_1016-snap-gene-0.5-mRNA-1	GlcNac transferase	NA
Module 3	maker-pcu_contig_103-snap-gene-0.19-mRNA-1	Flagellar associated protein	NA
Module 3	maker-pcu_contig_10463-snap-gene-0.0-mRNA-1	Secreted RxLR effector peptide protein	NA
Module 3	maker-pcu_contig_1084-snap-gene-0.1-mRNA-1	Protein kinase	NA
Module 3	maker-pcu_contig_1105-snap-gene-0.11-mRNA-1	Conserved gene of unknown function	NA
Module 3	maker-pcu_contig_1122-snap-gene-0.3-mRNA-1	Conserved gene of unknown function	NA
Module 3	maker-pcu_contig_1165-snap-gene-0.2-mRNA-1	Conserved gene of unknown function	NA
Module 3	maker-pcu_contig_1189-snap-gene-0.1-mRNA-1	Conserved gene of unknown function	NA
Module 3	maker-pcu_contig_120-snap-gene-0.7-mRNA-1	Trichohyalin	NA
Module 3	maker-pcu_contig_123-snap-gene-0.14-mRNA-1	Conserved gene of unknown function	NA
Module 3	maker-pcu_contig_1272-snap-gene-0.3-mRNA-1	Serine protease family S01A	NA
Module 3	maker-pcu_contig_13291-snap-gene-0.0-mRNA-1	Ribosome-recycling factor	NA
Module 3	maker-pcu_contig_1352-snap-gene-0.4-mRNA-1	Conserved gene of unknown function	NA
Module 3	maker-pcu_contig_13579-snap-gene-0.1-mRNA-1	Nucleoside diphosphate kinase	NA
Module 3	maker-pcu_contig_1372-snap-gene-0.2-mRNA-1	Protein FAM188B	NA
Module 3	maker-pcu_contig_13731-snap-gene-0.0-mRNA-1	Conserved gene of unknown function	NA
Module 3	maker-pcu_contig_13887-snap-gene-0.1-mRNA-1	Serine hydroxymethyltransferase	NA
Module 3	maker-pcu_contig_13925-snap-gene-0.1-mRNA-1	Polysaccharide lyase	NA
Module 3	maker-pcu_contig_14298-snap-gene-0.0-mRNA-1	Conserved gene of unknown function	NA
Module 3	maker-pcu_contig_146-snap-gene-0.12-mRNA-1	Voltage-gated Ion Channel (VIC) Superfamily	NA
Module 3	maker-pcu_contig_149-snap-gene-0.9-mRNA-1	Conserved gene of unknown function	NA
Module 3	maker-pcu_contig_1495-snap-gene-0.0-mRNA-1	Regulator of G protein signaling	NA
Module 3	maker-pcu_contig_15060-snap-gene-0.0-mRNA-1	D-erythrose-4-phosphate dehydrogenase	NA
Module 3	maker-pcu_contig_1535-snap-gene-0.4-mRNA-1	Serine protease family S08A	NA
Module 3	maker-pcu_contig_161-snap-gene-0.12-mRNA-1	Protein of unknown function DUF1126	NA
Module 3	maker-pcu_contig_1657-snap-gene-0.1-mRNA-1	Conserved gene of unknown function	NA
Module 3	maker-pcu_contig_168-snap-gene-0.3-mRNA-1	Alpha,alpha-trehalose-phosphate synthase [UDP-forming]	NA
Module 3	maker-pcu_contig_169-snap-gene-0.13-mRNA-1	Conserved gene of unknown function	NA
Module 3	maker-pcu_contig_169-snap-gene-0.14-mRNA-1	Voltage-gated Ion Channel (VIC) Superfamily	NA
Module 3	maker-pcu_contig_17295-snap-gene-0.1-mRNA-1	Aspartate ammonia-lyase	NA
Module 3	maker-pcu_contig_17578-snap-gene-0.0-mRNA-1	Secreted RxLR effector peptide protein	NA
Module 3	maker-pcu_contig_184-snap-gene-0.8-mRNA-1	Liver stage antigen	NA
Module 3	maker-pcu_contig_1854-snap-gene-0.1-mRNA-1	Delta-aminolevulinic acid dehydratase	NA
Module 3	maker-pcu_contig_1864-snap-gene-0.1-mRNA-1	Ribosomal RNA small subunit methyltransferase H	NA
Module 3	maker-pcu_contig_1864-snap-gene-0.2-mRNA-1	ATP-dependent protease ATPase subunit HslU	NA
Module 3	maker-pcu_contig_18653-snap-gene-0.1-mRNA-1	Threonyl-tRNA synthetase	NA
Module 3	maker-pcu_contig_189-snap-gene-0.2-mRNA-1	Conserved gene of unknown function	NA
Module 3	maker-pcu_contig_1892-snap-gene-0.4-mRNA-1	Conserved gene of unknown function	NA
Module 3	maker-pcu_contig_1896-snap-gene-0.0-mRNA-1	3-hydroxyisobutyrate dehydrogenase	NA
Module 3	maker-pcu_contig_194-snap-gene-0.8-mRNA-1	GAF domain-containing protein	NA
Module 3	maker-pcu_contig_19955-snap-gene-0.1-mRNA-1	Leucyl-tRNA synthetase	NA
Module 3	maker-pcu_contig_20106-snap-gene-0.1-mRNA-1	Aconitase	NA
Module 3	maker-pcu_contig_203-snap-gene-0.8-mRNA-1	Conserved gene of unknown function	NA
Module 3	maker-pcu_contig_207-snap-gene-0.7-mRNA-1	Outer membrane protein A	NA
Module 3	maker-pcu_contig_2075-snap-gene-0.0-mRNA-1	Conserved gene of unknown function	NA
Module 3	maker-pcu_contig_2120-fgenesh-gene-0.0-mRNA-1	Glu/Leu/Phe/Val dehydrogenase	NA
Module 3	maker-pcu_contig_215-snap-gene-0.13-mRNA-1	Leucine rich repeat containing 9 isoform 3	NA
Module 3	maker-pcu_contig_219-snap-gene-0.8-mRNA-1	WD-40 repeat protein	NA
Module 3	maker-pcu_contig_2194-snap-gene-0.4-mRNA-1	Sensor histidine kinase	NA
Module 3	maker-pcu_contig_223-snap-gene-0.7-mRNA-1	Kinesin	NA
Module 3	maker-pcu_contig_22437-snap-gene-0.0-mRNA-1	Ribosomal protein S16	NA
Module 3	maker-pcu_contig_23-snap-gene-0.22-mRNA-1	Conserved gene of unknown function	NA
Module 3	maker-pcu_contig_2312-snap-gene-0.1-mRNA-1	Anthranilate synthase component I	NA
Module 3	maker-pcu_contig_2338-snap-gene-0.1-mRNA-1	Conserved gene of unknown function	NA
Module 3	maker-pcu_contig_23472-fgenesh-gene-0.0-mRNA-1	Carbamoyl-phosphate synthase small chain	NA
Module 3	maker-pcu_contig_23531-snap-gene-0.0-mRNA-1	Necrosis-inducing	NA
Module 3	maker-pcu_contig_2402-snap-gene-0.1-mRNA-1	Potassium/sodium hyperpolarization-activated cyclic nucleotide-gated channel	NA
Module 3	maker-pcu_contig_2405-fgenesh-gene-0.0-mRNA-1	5-oxoprolinase (ATP-hydrolyzing)	NA
Module 3	maker-pcu_contig_2448-snap-gene-0.2-mRNA-1	PKD domain containing protein	NA
Module 3	maker-pcu_contig_2494-snap-gene-0.2-mRNA-1	Acetyltransferase (GNAT) family	NA
Module 3	maker-pcu_contig_26808-snap-gene-0.0-mRNA-1	CTP synthase	NA
Module 3	maker-pcu_contig_272-snap-gene-0.7-mRNA-1	Hypothetical leucine rich repeat protein	NA
Module 3	maker-pcu_contig_27901-snap-gene-0.0-mRNA-1	Isoleucyl-tRNA synthetase	NA
Module 3	maker-pcu_contig_28-snap-gene-0.13-mRNA-1	CENTRIOLIN	NA
Module 3	maker-pcu_contig_2819-fgenesh-gene-0.2-mRNA-1	Amine oxidase	NA
Module 3	maker-pcu_contig_29-snap-gene-0.22-mRNA-1	Conserved gene of unknown function	NA
Module 3	maker-pcu_contig_29-snap-gene-0.8-mRNA-1	CAP-binding protein complex interacting protein 1, partial	NA
Module 3	maker-pcu_contig_2930-snap-gene-0.1-mRNA-1	Acetyl-CoA acetyltransferase	NA
Module 3	maker-pcu_contig_294-snap-gene-0.12-mRNA-1	Gene of unknown function	NA
Module 3	maker-pcu_contig_309-snap-gene-0.6-mRNA-1	Centrosomal protein 2	NA
Module 3	maker-pcu_contig_3113-snap-gene-0.1-mRNA-1	Transporter, hydrophobe/amphiphile efflux-1 (HAE1) family	NA
Module 3	maker-pcu_contig_3142-snap-gene-0.0-mRNA-1	DNA-dependent protein kinase catalytic subunit	NA
Module 3	maker-pcu_contig_3142-snap-gene-0.1-mRNA-1	DNA-dependent protein kinase catalytic subunit	NA
Module 3	maker-pcu_contig_31577-snap-gene-0.0-mRNA-1	Glutamate synthase, large subunit	NA
Module 3	maker-pcu_contig_3169-snap-gene-0.0-mRNA-1	Gene of unknown function	NA
Module 3	maker-pcu_contig_3222-snap-gene-0.0-mRNA-1	DNA gyrase subunit B	NA
Module 3	maker-pcu_contig_33225-snap-gene-0.0-mRNA-1	Gene of unknown function	NA
Module 3	maker-pcu_contig_3324-snap-gene-0.0-mRNA-1	Protein tyrosine phosphatase domain-containing protein 1	NA
Module 3	maker-pcu_contig_3390-fgenesh-gene-0.0-mRNA-1	Ribosome small subunit-dependent GTPase A	NA
Module 3	maker-pcu_contig_3430-snap-gene-0.0-mRNA-1	Conserved gene of unknown function	NA
Module 3	maker-pcu_contig_358-snap-gene-0.13-mRNA-1	Trichohyalin	NA
Module 3	maker-pcu_contig_367-snap-gene-0.1-mRNA-1	Ubiquitin-specific protease	NA
Module 3	maker-pcu_contig_37-snap-gene-0.17-mRNA-1	Nardilysin	NA
Module 3	maker-pcu_contig_37-snap-gene-0.26-mRNA-1	Voltage-gated Ion Channel (VIC) Superfamily	NA
Module 3	maker-pcu_contig_38-snap-gene-0.13-mRNA-1	Abnormal spindle-like microcephaly-associated protein homolog	NA
Module 3	maker-pcu_contig_383-snap-gene-0.9-mRNA-1	FkbH	NA
Module 3	maker-pcu_contig_3900-snap-gene-0.0-mRNA-1	TonB-dependent receptor	NA
Module 3	maker-pcu_contig_3995-fgenesh-gene-0.0-mRNA-1	Fimbrial assembly protein	NA
Module 3	maker-pcu_contig_4-snap-gene-0.28-mRNA-1	Gene of unknown function	NA
Module 3	maker-pcu_contig_41-snap-gene-0.21-mRNA-1	Gene of unknown function	NA
Module 3	maker-pcu_contig_417-snap-gene-0.5-mRNA-1	Liver stage antigen	NA
Module 3	maker-pcu_contig_4285-fgenesh-gene-0.0-mRNA-1	(Dimethylallyl)adenosine tRNA methylthiotransferase miaB	NA
Module 3	maker-pcu_contig_434-snap-gene-0.8-mRNA-1	Paramyosin	NA
Module 3	maker-pcu_contig_4363-fgenesh-gene-0.0-mRNA-1	UvrD/REP helicase	NA
Module 3	maker-pcu_contig_44-snap-gene-0.20-mRNA-1	Sterol 3-beta-glucosyltransferase	NA
Module 3	maker-pcu_contig_443-snap-gene-0.6-mRNA-1	Conserved gene of unknown function	NA
Module 3	maker-pcu_contig_4445-snap-gene-0.1-mRNA-1	Conserved gene of unknown function	NA
Module 3	maker-pcu_contig_4557-snap-gene-0.2-mRNA-1	Glycoside hydrolase	NA
Module 3	maker-pcu_contig_4916-snap-gene-0.1-mRNA-1	Transcriptional regulator, AraC family	NA
Module 3	maker-pcu_contig_509-snap-gene-0.7-mRNA-1	Ankyrin repeat protein	NA
Module 3	maker-pcu_contig_512-snap-gene-0.7-mRNA-1	Leucine Rich Repeat family protein	NA
Module 3	maker-pcu_contig_527-snap-gene-0.9-mRNA-1	Ojoplano variant B	NA
Module 3	maker-pcu_contig_542-snap-gene-0.4-mRNA-1	Conserved gene of unknown function	NA
Module 3	maker-pcu_contig_595-snap-gene-0.7-mRNA-1	Rho-associated protein kinase	NA
Module 3	maker-pcu_contig_642-snap-gene-0.6-mRNA-1	B0024.8 isoform 2	NA
Module 3	maker-pcu_contig_67-snap-gene-0.13-mRNA-1	Regulator of G-protein signaling 5	NA
Module 3	maker-pcu_contig_67-snap-gene-0.20-mRNA-1	Conserved gene of unknown function	NA
Module 3	maker-pcu_contig_6700-fgenesh-gene-0.0-mRNA-1	4-hydroxybenzoyl-CoA reductase	NA
Module 3	maker-pcu_contig_6737-snap-gene-0.0-mRNA-1	Conserved gene of unknown function	NA
Module 3	maker-pcu_contig_70-snap-gene-0.10-mRNA-1	Centromere protein E	NA
Module 3	maker-pcu_contig_709-snap-gene-0.10-mRNA-1	Metalloprotease family M76	NA
Module 3	maker-pcu_contig_741-snap-gene-0.6-mRNA-1	Leucine-rich repeat-containing protein 56.	NA
Module 3	maker-pcu_contig_7642-snap-gene-0.0-mRNA-1	Conserved gene of unknown function	NA
Module 3	maker-pcu_contig_774-snap-gene-0.4-mRNA-1	Conserved gene of unknown function	NA
Module 3	maker-pcu_contig_785-snap-gene-0.5-mRNA-1	Outer Dynein Arm Docking Complex	NA
Module 3	maker-pcu_contig_787-snap-gene-0.3-mRNA-1	FAD linked oxidase domain protein	NA
Module 3	maker-pcu_contig_881-snap-gene-0.5-mRNA-1	AMP-dependent synthetase and ligase	NA
Module 3	maker-pcu_contig_9-snap-gene-0.35-mRNA-1	Conserved gene of unknown function	NA
Module 3	maker-pcu_contig_91-snap-gene-0.12-mRNA-1	Conserved gene of unknown function	NA
Module 3	maker-pcu_contig_92-snap-gene-0.14-mRNA-1	Conserved gene of unknown function	NA
Module 3	maker-pcu_contig_920-snap-gene-0.2-mRNA-1	Kinesin K39	NA
Module 3	maker-pcu_contig_9300-snap-gene-0.2-mRNA-1	Gene of unknown function	NA
Module 3	maker-pcu_contig_949-snap-gene-0.3-mRNA-1	Conserved gene of unknown function	NA
Module 3	maker-pcu_contig_958-snap-gene-0.3-mRNA-1	Transmembrane protein	NA
Module 3	maker-pcu_contig_9583-snap-gene-0.0-mRNA-1	O-methyltransferase, family 3	NA
Module 3	maker-pcu_contig_9680-snap-gene-0.0-mRNA-1	Conserved gene of unknown function	NA
Module 3	maker-pcu_contig_9703-snap-gene-0.0-mRNA-1	Transmembrane protein	NA
Module 3	maker-pcu_contig_9887-fgenesh-gene-0.0-mRNA-1	AMP nucleosidase	NA
Module 3	maker-pcu_contig_996-snap-gene-0.1-mRNA-1	P-type ATPase (P-ATPase) Superfamily	NA
Module 4	maker-pcu_contig_1-snap-gene-0.26-mRNA-1	Conserved gene of unknown function	NA
Module 4	maker-pcu_contig_1-snap-gene-0.31-mRNA-1	Conserved gene of unknown function	NA
Module 4	maker-pcu_contig_10-fgenesh-gene-0.6-mRNA-1	Gene of unknown function	NA
Module 4	maker-pcu_contig_10-snap-gene-0.16-mRNA-1	C. briggsae CBR-KLP-6 protein	NA
Module 4	maker-pcu_contig_10-snap-gene-0.39-mRNA-1	WD domain-containing protein	NA
Module 4	maker-pcu_contig_100-snap-gene-0.18-mRNA-1	Conserved gene of unknown function	NA
Module 4	maker-pcu_contig_10012-snap-gene-0.1-mRNA-1	Phosphatidylinositol kinase (PIK-F)	NA
Module 4	maker-pcu_contig_1005-fgenesh-gene-0.1-mRNA-1	Conserved gene of unknown function	NA
Module 4	maker-pcu_contig_1009-snap-gene-0.6-mRNA-1	Conserved gene of unknown function	NA
Module 4	maker-pcu_contig_101-snap-gene-0.11-mRNA-1	Adenine phosphoribosyltransferase	NA
Module 4	maker-pcu_contig_101-snap-gene-0.19-mRNA-1	Conserved gene of unknown function	NA
Module 4	maker-pcu_contig_101-snap-gene-0.20-mRNA-1	Conserved gene of unknown function	NA
Module 4	maker-pcu_contig_1011-snap-gene-0.5-mRNA-1	Gene of unknown function	NA
Module 4	maker-pcu_contig_10128-snap-gene-0.0-mRNA-1	Titin isoform N2-B	NA
Module 4	maker-pcu_contig_1016-snap-gene-0.2-mRNA-1	Importin-alpha1	NA
Module 4	maker-pcu_contig_10168-snap-gene-0.0-mRNA-1	Nucleolar protein	NA
Module 4	maker-pcu_contig_1020-snap-gene-0.4-mRNA-1	R-SNARE protein, VAMP72-family	NA
Module 4	maker-pcu_contig_10256-snap-gene-0.0-mRNA-1	Long-chain-fatty-acid-CoA ligase	NA
Module 4	maker-pcu_contig_1027-snap-gene-0.3-mRNA-1	5-formyltetrahydrofolate cyclo-ligase	NA
Module 4	maker-pcu_contig_1029-snap-gene-0.3-mRNA-1	Erythrocyte binding protein	NA
Module 4	maker-pcu_contig_1029-snap-gene-0.4-mRNA-1	Conserved gene of unknown function	NA
Module 4	maker-pcu_contig_103-snap-gene-0.20-mRNA-1	Mitochondrial Carrier (MC) Family	NA
Module 4	maker-pcu_contig_10336-snap-gene-0.1-mRNA-1	Conserved gene of unknown function	NA
Module 4	maker-pcu_contig_1036-snap-gene-0.7-mRNA-1	WD repeat-containing protein 82	NA
Module 4	maker-pcu_contig_1037-snap-gene-0.4-mRNA-1	Conserved gene of unknown function	NA
Module 4	maker-pcu_contig_104-snap-gene-0.13-mRNA-1	Dolichol kinase	NA
Module 4	maker-pcu_contig_10409-snap-gene-0.0-mRNA-1	Deoxyribonuclease	NA
Module 4	maker-pcu_contig_1044-fgenesh-gene-0.2-mRNA-1	Methylosome subunit pICln	NA
Module 4	maker-pcu_contig_10447-snap-gene-0.0-mRNA-1	Conserved gene of unknown function	NA
Module 4	maker-pcu_contig_1045-snap-gene-0.2-mRNA-1	NP61201.	NA
Module 4	maker-pcu_contig_10466-snap-gene-0.1-mRNA-1	Vesicle transport protein, Got1/SFT2-like	NA
Module 4	maker-pcu_contig_1050-snap-gene-0.6-mRNA-1	DNA-directed RNA polymerase III subunit RPC9	NA
Module 4	maker-pcu_contig_10522-fgenesh-gene-0.0-mRNA-1	Elicitin RAL13E	NA
Module 4	maker-pcu_contig_1054-snap-gene-0.2-mRNA-1	6-pyruvoyl tetrahydropterin synthase	NA
Module 4	maker-pcu_contig_1056-snap-gene-0.3-mRNA-1	Conserved gene of unknown function	NA
Module 4	maker-pcu_contig_1060-snap-gene-0.2-mRNA-1	Conserved gene of unknown function	NA
Module 4	maker-pcu_contig_10624-snap-gene-0.0-mRNA-1	Alpha mannosyltransferase	NA
Module 4	maker-pcu_contig_10634-snap-gene-0.0-mRNA-1	CK1 family protein kinase	NA
Module 4	maker-pcu_contig_10658-snap-gene-0.0-mRNA-1	Myb-like DNA-binding protein	PF00249(Myb, DNA-binding)
Module 4	maker-pcu_contig_10690-snap-gene-0.1-mRNA-1	SNARE associated Golgi protein	NA
Module 4	maker-pcu_contig_1070-snap-gene-0.1-mRNA-1	Conserved gene of unknown function	NA
Module 4	maker-pcu_contig_10725-snap-gene-0.0-mRNA-1	Acyltransferase family	NA
Module 4	maker-pcu_contig_10746-snap-gene-0.2-mRNA-1	Gene of unknown function	NA
Module 4	maker-pcu_contig_10746-snap-gene-0.3-mRNA-1	Polysaccharide lyase	NA
Module 4	maker-pcu_contig_1078-snap-gene-0.1-mRNA-1	Conserved gene of unknown function	NA
Module 4	maker-pcu_contig_1080-snap-gene-0.1-mRNA-1	Exocyst complex subunit 8	NA
Module 4	maker-pcu_contig_10839-snap-gene-0.0-mRNA-1	Insulin-degrading-like enzyme, metalloprotease family M16A	NA
Module 4	maker-pcu_contig_1084-snap-gene-0.4-mRNA-1	Leucine carboxyl methyltransferase family protein	NA
Module 4	maker-pcu_contig_1088-snap-gene-0.2-mRNA-1	Conserved gene of unknown function	NA
Module 4	maker-pcu_contig_1089-snap-gene-0.2-mRNA-1	Protein-tyrosine phosphatase mitochondrial 1, mitochondrial	NA
Module 4	maker-pcu_contig_1089-snap-gene-0.3-mRNA-1	Conserved gene of unknown function	NA
Module 4	maker-pcu_contig_109-snap-gene-0.12-mRNA-1	Qc-SNARE protein, SYP7-family	NA
Module 4	maker-pcu_contig_109-snap-gene-0.8-mRNA-1	TRNA (Guanine-N(7)-)-methyltransferase	NA
Module 4	maker-pcu_contig_10910-snap-gene-0.0-mRNA-1	Conserved gene of unknown function	NA
Module 4	maker-pcu_contig_10922-snap-gene-0.0-mRNA-1	Conserved gene of unknown function	NA
Module 4	maker-pcu_contig_1093-fgenesh-gene-0.0-mRNA-1	Nf-kappa B activating protein	NA
Module 4	maker-pcu_contig_1094-snap-gene-0.7-mRNA-1	Avh163	NA
Module 4	maker-pcu_contig_10999-snap-gene-0.0-mRNA-1	Conserved gene of unknown function	NA
Module 4	maker-pcu_contig_11-snap-gene-0.20-mRNA-1	Conserved gene of unknown function	NA
Module 4	maker-pcu_contig_11-snap-gene-0.31-mRNA-1	Serine protease family S54	NA
Module 4	maker-pcu_contig_1100-snap-gene-0.2-mRNA-1	Flagellar associated protein	NA
Module 4	maker-pcu_contig_1105-snap-gene-0.7-mRNA-1	U3 small nucleolar ribonucleoprotein protein IMP3	NA
Module 4	maker-pcu_contig_1106-snap-gene-0.3-mRNA-1	S-adenosyl-L-methionine-dependent methyltransferase mraW	NA
Module 4	maker-pcu_contig_1106-snap-gene-0.4-mRNA-1	Palmitoyltransferase	NA
Module 4	maker-pcu_contig_1108-snap-gene-0.2-mRNA-1	Gene of unknown function	NA
Module 4	maker-pcu_contig_1118-snap-gene-0.3-mRNA-1	Conserved gene of unknown function	NA
Module 4	maker-pcu_contig_11186-snap-gene-0.0-mRNA-1	Marine cyanobacterial conserved hypothetical	NA
Module 4	maker-pcu_contig_1119-snap-gene-0.6-mRNA-1	Conserved gene of unknown function	NA
Module 4	maker-pcu_contig_112-snap-gene-0.13-mRNA-1	CDK5 and ABL1 enzyme substrate 1	NA
Module 4	maker-pcu_contig_112-snap-gene-0.17-mRNA-1	N(6)-adenine-specific DNA methyltransferase	NA
Module 4	maker-pcu_contig_1120-snap-gene-0.3-mRNA-1	WD repeat protein 31.	NA
Module 4	maker-pcu_contig_1120-snap-gene-0.5-mRNA-1	Conserved gene of unknown function	NA
Module 4	maker-pcu_contig_1120-snap-gene-0.6-mRNA-1	Conserved gene of unknown function	PF00170(bZIP transcription factor, bZIP-1)
Module 4	maker-pcu_contig_11216-snap-gene-0.1-mRNA-1	Phosphoinositol transporter	NA
Module 4	maker-pcu_contig_1129-snap-gene-0.2-mRNA-1	AFG1-family ATPase	NA
Module 4	maker-pcu_contig_113-snap-gene-0.13-mRNA-1	Conserved gene of unknown function	NA
Module 4	maker-pcu_contig_113-snap-gene-0.9-mRNA-1	U4/U6 small nuclear ribonucleoprotein Prp4	NA
Module 4	maker-pcu_contig_11313-snap-gene-0.0-mRNA-1	Conserved gene of unknown function	NA
Module 4	maker-pcu_contig_11351-snap-gene-0.1-mRNA-1	Pc22g22670 protein	NA
Module 4	maker-pcu_contig_11352-fgenesh-gene-0.0-mRNA-1	U6 snRNA-associated Sm LSm6	NA
Module 4	maker-pcu_contig_11406-snap-gene-0.0-mRNA-1	Mucin	NA
Module 4	maker-pcu_contig_11427-snap-gene-0.0-mRNA-1	Phosphatidylinositol kinase (PIK-5)	NA
Module 4	maker-pcu_contig_11469-snap-gene-0.0-mRNA-1	Pre-mRNA-splicing factor cwc2	NA
Module 4	maker-pcu_contig_11469-snap-gene-0.1-mRNA-1	Pre-mRNA-splicing factor cwc2	NA
Module 4	maker-pcu_contig_1147-snap-gene-0.4-mRNA-1	Mitochondrial inner membrane protease subunit	NA
Module 4	maker-pcu_contig_1147-snap-gene-0.7-mRNA-1	DCRA	NA
Module 4	maker-pcu_contig_1151-fgenesh-gene-0.1-mRNA-1	Mouse mpv17 protein	NA
Module 4	maker-pcu_contig_1151-snap-gene-0.8-mRNA-1	Conserved gene of unknown function	NA
Module 4	maker-pcu_contig_1155-snap-gene-0.4-mRNA-1	Tetratricopeptide repeat protein	NA
Module 4	maker-pcu_contig_1157-snap-gene-0.4-mRNA-1	Molybdopterin binding domain protein	NA
Module 4	maker-pcu_contig_11577-snap-gene-0.1-mRNA-1	P-type ATPase (P-ATPase) Superfamily	NA
Module 4	maker-pcu_contig_1159-snap-gene-0.3-mRNA-1	Palmitoyltransferase	NA
Module 4	maker-pcu_contig_11598-snap-gene-0.1-mRNA-1	Magnesium-dependent phosphatase 1	NA
Module 4	maker-pcu_contig_116-snap-gene-0.12-mRNA-1	Jerky homolog	PF04218(Centromere protein Cenp-B, DNA-binding domain 1)
Module 4	maker-pcu_contig_11652-snap-gene-0.1-mRNA-1	Ubiquitin-conjugating enzyme E2	NA
Module 4	maker-pcu_contig_11655-snap-gene-0.0-mRNA-1	Transcription factor jumonji (jmjC) domain-containing protein	PF02373 (Transcription factor Jumonji)
Module 4	maker-pcu_contig_1166-snap-gene-0.4-mRNA-1	DNA ligase	NA
Module 4	maker-pcu_contig_117-snap-gene-0.5-mRNA-1	GTP-binding protein engB	NA
Module 4	maker-pcu_contig_11721-snap-gene-0.0-mRNA-1	Conserved gene of unknown function	NA
Module 4	maker-pcu_contig_1177-fgenesh-gene-0.0-mRNA-1	Hook homolog 2 (h-hook2)	NA
Module 4	maker-pcu_contig_11785-snap-gene-0.0-mRNA-1	Conserved gene of unknown function	NA
Module 4	maker-pcu_contig_11798-snap-gene-0.1-mRNA-1	RMD5 family protein	NA
Module 4	maker-pcu_contig_118-snap-gene-0.7-mRNA-1	Nucleotide-binding protein	NA
Module 4	maker-pcu_contig_11810-snap-gene-0.0-mRNA-1	Secreted RxLR effector peptide protein	NA
Module 4	maker-pcu_contig_1182-fgenesh-gene-0.1-mRNA-1	Conserved gene of unknown function	NA
Module 4	maker-pcu_contig_11822-snap-gene-0.0-mRNA-1	Mucin	NA
Module 4	maker-pcu_contig_11830-snap-gene-0.1-mRNA-1	Scavenger mRNA-decapping enzyme DcpS	NA
Module 4	maker-pcu_contig_11839-snap-gene-0.1-mRNA-1	Jumonji domain containing 4	NA
Module 4	maker-pcu_contig_11862-snap-gene-0.1-mRNA-1	Colon cancer-associated protein Mic1-like containing protein	NA
Module 4	maker-pcu_contig_1189-snap-gene-0.3-mRNA-1	ATPase or kinase	NA
Module 4	maker-pcu_contig_1193-snap-gene-0.1-mRNA-1	Protein kinase	NA
Module 4	maker-pcu_contig_1197-snap-gene-0.3-mRNA-1	Putative HRAS-like suppressor variant 3	NA
Module 4	maker-pcu_contig_12-snap-gene-0.13-mRNA-1	Protein kinase	NA
Module 4	maker-pcu_contig_12-snap-gene-0.18-mRNA-1	Mitochondrial Carrier (MC) Family	NA
Module 4	maker-pcu_contig_1207-snap-gene-0.4-mRNA-1	Ribosomal RNA methyltransferase	NA
Module 4	maker-pcu_contig_121-snap-gene-0.15-mRNA-1	Protein kinase	NA
Module 4	maker-pcu_contig_121-snap-gene-0.16-mRNA-1	Tetratricopeptide repeat protein	NA
Module 4	maker-pcu_contig_1211-fgenesh-gene-0.0-mRNA-1	GRIP1-associated protein	NA
Module 4	maker-pcu_contig_1213-snap-gene-0.3-mRNA-1	Conserved gene of unknown function	NA
Module 4	maker-pcu_contig_12156-snap-gene-0.0-mRNA-1	Conserved gene of unknown function	NA
Module 4	maker-pcu_contig_122-snap-gene-0.4-mRNA-1	Conserved gene of unknown function	NA
Module 4	maker-pcu_contig_1221-snap-gene-0.7-mRNA-1	Protein midA, mitochondrial	NA
Module 4	maker-pcu_contig_12255-snap-gene-0.1-mRNA-1	Vacuolar protein-sorting-associated protein 25	NA
Module 4	maker-pcu_contig_1227-snap-gene-0.5-mRNA-1	Mitochondrial intermediate peptidase	NA
Module 4	maker-pcu_contig_1229-fgenesh-gene-0.1-mRNA-1	RRNA-processing protein	NA
Module 4	maker-pcu_contig_123-snap-gene-0.18-mRNA-1	WD domain-containing protein	NA
Module 4	maker-pcu_contig_1237-fgenesh-gene-0.1-mRNA-1	Conserved gene of unknown function	NA
Module 4	maker-pcu_contig_1238-snap-gene-0.5-mRNA-1	Lysyl-tRNA synthetase	NA
Module 4	maker-pcu_contig_12392-snap-gene-0.0-mRNA-1	Transmembrane protein	NA
Module 4	maker-pcu_contig_124-snap-gene-0.12-mRNA-1	Acetyltransferases	NA
Module 4	maker-pcu_contig_124-snap-gene-0.23-mRNA-1	COX19 homolog, cytochrome c oxidase assembly protein	NA
Module 4	maker-pcu_contig_12403-snap-gene-0.0-mRNA-1	Conserved gene of unknown function	NA
Module 4	maker-pcu_contig_1245-snap-gene-0.4-mRNA-1	Conserved gene of unknown function	NA
Module 4	maker-pcu_contig_12496-snap-gene-0.1-mRNA-1	Hydroxyacylglutathione hydrolase	NA
Module 4	maker-pcu_contig_125-snap-gene-0.11-mRNA-1	Conserved gene of unknown function	NA
Module 4	maker-pcu_contig_125-snap-gene-0.5-mRNA-1	GPN-loop GTPase 1	NA
Module 4	maker-pcu_contig_1257-fgenesh-gene-0.0-mRNA-1	Conserved gene of unknown function	NA
Module 4	maker-pcu_contig_1257-snap-gene-0.3-mRNA-1	Conserved gene of unknown function	NA
Module 4	maker-pcu_contig_126-snap-gene-0.30-mRNA-1	Glutamine cyclotransferase	NA
Module 4	maker-pcu_contig_1260-snap-gene-0.2-mRNA-1	Signal peptidase complex subunit 3	NA
Module 4	maker-pcu_contig_1260-snap-gene-0.6-mRNA-1	Phosphatidylinositide phosphatase SAC1	NA
Module 4	maker-pcu_contig_1261-snap-gene-0.3-mRNA-1	Transmembrane protein	NA
Module 4	maker-pcu_contig_12641-snap-gene-0.0-mRNA-1	Methylcrotonoyl-CoA carboxylase beta chain, mitochondrial	NA
Module 4	maker-pcu_contig_1265-snap-gene-0.2-mRNA-1	Ubiquitin carboxyl-terminal hydrolase	NA
Module 4	maker-pcu_contig_12688-snap-gene-0.0-mRNA-1	Conserved gene of unknown function	NA
Module 4	maker-pcu_contig_12696-snap-gene-0.0-mRNA-1	2-oxoglutarate dehydrogenase	NA
Module 4	maker-pcu_contig_12701-snap-gene-0.0-mRNA-1	Crinkler (CRN) family protein	NA
Module 4	maker-pcu_contig_1271-snap-gene-0.8-mRNA-1	Protein FAM116 homolog	NA
Module 4	maker-pcu_contig_1272-snap-gene-0.6-mRNA-1	Conserved gene of unknown function	NA
Module 4	maker-pcu_contig_1277-snap-gene-0.3-mRNA-1	CBF1-interacting co-repressor CIR, N-terminal	NA
Module 4	maker-pcu_contig_12791-snap-gene-0.1-mRNA-1	Rab3 GTPase-activating protein catalytic subunit	NA
Module 4	maker-pcu_contig_128-snap-gene-0.16-mRNA-1	Ankyrin domain protein ank2	NA
Module 4	maker-pcu_contig_12840-snap-gene-0.1-mRNA-1	Ubiquitin-conjugating enzyme E2	NA
Module 4	maker-pcu_contig_12840-snap-gene-0.2-mRNA-1	Ubiquitin carrier protein	NA
Module 4	maker-pcu_contig_12843-snap-gene-0.0-mRNA-1	Cstf-64-prov protein	NA
Module 4	maker-pcu_contig_12889-snap-gene-0.0-mRNA-1	Secreted RxLR effector peptide protein	NA
Module 4	maker-pcu_contig_1289-snap-gene-0.1-mRNA-1	Gene of unknown function	NA
Module 4	maker-pcu_contig_1289-snap-gene-0.2-mRNA-1	Gene of unknown function	NA
Module 4	maker-pcu_contig_129-snap-gene-0.11-mRNA-1	Conserved gene of unknown function	NA
Module 4	maker-pcu_contig_1294-snap-gene-0.2-mRNA-1	Double-strand-break repair protein rad21	NA
Module 4	maker-pcu_contig_1294-snap-gene-0.3-mRNA-1	Double-strand-break repair protein rad21	NA
Module 4	maker-pcu_contig_13-snap-gene-0.19-mRNA-1	Conserved gene of unknown function	NA
Module 4	maker-pcu_contig_13-snap-gene-0.34-mRNA-1	Conserved gene of unknown function	NA
Module 4	maker-pcu_contig_1300-fgenesh-gene-0.1-mRNA-1	Conserved gene of unknown function	NA
Module 4	maker-pcu_contig_1302-snap-gene-0.4-mRNA-1	Conserved gene of unknown function	NA
Module 4	maker-pcu_contig_1303-snap-gene-0.1-mRNA-1	Transmembrane protein	NA
Module 4	maker-pcu_contig_13033-snap-gene-0.1-mRNA-1	Conserved gene of unknown function	NA
Module 4	maker-pcu_contig_13061-snap-gene-0.0-mRNA-1	Loricrin	NA
Module 4	maker-pcu_contig_131-fgenesh-gene-0.6-mRNA-1	Elongation factor Ts	NA
Module 4	maker-pcu_contig_131-snap-gene-0.10-mRNA-1	Ankyrin repeat domain-containing protein 28.	NA
Module 4	maker-pcu_contig_131-snap-gene-0.12-mRNA-1	Heme/Steroid binding domain	NA
Module 4	maker-pcu_contig_131-snap-gene-0.14-mRNA-1	Endonuclease/exonuclease/phosphatase family protein	NA
Module 4	maker-pcu_contig_1313-snap-gene-0.5-mRNA-1	Conserved gene of unknown function	NA
Module 4	maker-pcu_contig_132-snap-gene-0.15-mRNA-1	Conserved gene of unknown function	NA
Module 4	maker-pcu_contig_132-snap-gene-0.16-mRNA-1	BRCT	NA
Module 4	maker-pcu_contig_132-snap-gene-0.19-mRNA-1	Nuclear receptor subfamily 1, group H, member 2-like, partial	NA
Module 4	maker-pcu_contig_13205-snap-gene-0.0-mRNA-1	Conserved gene of unknown function	NA
Module 4	maker-pcu_contig_13244-snap-gene-0.0-mRNA-1	Conserved gene of unknown function	NA
Module 4	maker-pcu_contig_1326-snap-gene-0.2-mRNA-1	Conserved gene of unknown function	NA
Module 4	maker-pcu_contig_13262-snap-gene-0.1-mRNA-1	Glycoside hydrolase	NA
Module 4	maker-pcu_contig_13330-snap-gene-0.0-mRNA-1	Secreted RxLR effector peptide protein	NA
Module 4	maker-pcu_contig_1336-snap-gene-0.4-mRNA-1	DUF339 family protein	NA
Module 4	maker-pcu_contig_1346-snap-gene-0.4-mRNA-1	C8orf41 protein	NA
Module 4	maker-pcu_contig_13496-snap-gene-0.0-mRNA-1	Conserved gene of unknown function	NA
Module 4	maker-pcu_contig_135-snap-gene-0.22-mRNA-1	U1 small nuclear ribonucleoprotein C	NA
Module 4	maker-pcu_contig_1353-snap-gene-0.3-mRNA-1	Gene of unknown function	NA
Module 4	maker-pcu_contig_13588-snap-gene-0.0-mRNA-1	Conserved gene of unknown function	NA
Module 4	maker-pcu_contig_136-snap-gene-0.10-mRNA-1	Conserved gene of unknown function	NA
Module 4	maker-pcu_contig_136-snap-gene-0.15-mRNA-1	Gene of unknown function	NA
Module 4	maker-pcu_contig_136-snap-gene-0.8-mRNA-1	Sporangia induced TRP protein	NA
Module 4	maker-pcu_contig_1365-snap-gene-0.2-mRNA-1	Tubular mastigoneme protein	NA
Module 4	maker-pcu_contig_13687-snap-gene-0.0-mRNA-1	Crinkler (CRN) family protein	NA
Module 4	maker-pcu_contig_137-snap-gene-0.10-mRNA-1	Paramyosin	NA
Module 4	maker-pcu_contig_137-snap-gene-0.11-mRNA-1	Zinc finger protein 2	PF00096(Zinc finger, C2H2-type)
Module 4	maker-pcu_contig_13707-snap-gene-0.0-mRNA-1	Conserved gene of unknown function	NA
Module 4	maker-pcu_contig_1374-snap-gene-0.2-mRNA-1	Acetylornithine aminotransferase, mitochondrial	NA
Module 4	maker-pcu_contig_13754-snap-gene-0.0-mRNA-1	Glycoside hydrolase	NA
Module 4	maker-pcu_contig_138-snap-gene-0.7-mRNA-1	Dynein heavy chain	NA
Module 4	maker-pcu_contig_1385-snap-gene-0.3-mRNA-1	Cleavage and polyadenylation specificity factor subunit	NA
Module 4	maker-pcu_contig_139-snap-gene-0.10-mRNA-1	Zinc carboxypeptidase family protein	NA
Module 4	maker-pcu_contig_139-snap-gene-0.18-mRNA-1	Conserved gene of unknown function	NA
Module 4	maker-pcu_contig_1390-snap-gene-0.5-mRNA-1	Acyl-CoA dehydrogenase	NA
Module 4	maker-pcu_contig_13908-snap-gene-0.2-mRNA-1	Cysteine synthase	NA
Module 4	maker-pcu_contig_14-fgenesh-gene-0.6-mRNA-1	Conserved gene of unknown function	NA
Module 4	maker-pcu_contig_140-snap-gene-0.11-mRNA-1	Transmembrane protein	NA
Module 4	maker-pcu_contig_140-snap-gene-0.14-mRNA-1	Conserved gene of unknown function	NA
Module 4	maker-pcu_contig_14011-snap-gene-0.1-mRNA-1	Rhodanese domain protein	NA
Module 4	maker-pcu_contig_1405-snap-gene-0.2-mRNA-1	GPI transamidase component	NA
Module 4	maker-pcu_contig_14062-snap-gene-0.1-mRNA-1	Conserved gene of unknown function	NA
Module 4	maker-pcu_contig_14070-snap-gene-0.0-mRNA-1	Calcineurin-like phosphoesterase	NA
Module 4	maker-pcu_contig_141-snap-gene-0.23-mRNA-1	Adaptin	NA
Module 4	maker-pcu_contig_14129-fgenesh-gene-0.0-mRNA-1	Gene of unknown function	NA
Module 4	maker-pcu_contig_1415-snap-gene-0.5-mRNA-1	H/ACA ribonucleoprotein complex non-core subunit NAF1	NA
Module 4	maker-pcu_contig_142-snap-gene-0.13-mRNA-1	Leucine carboxyl methyltransferase	NA
Module 4	maker-pcu_contig_1428-fgenesh-gene-0.0-mRNA-1	Gene of unknown function	NA
Module 4	maker-pcu_contig_1428-snap-gene-0.8-mRNA-1	GH21903p	NA
Module 4	maker-pcu_contig_1430-snap-gene-0.4-mRNA-1	CG8067 CG8067-PA	NA
Module 4	maker-pcu_contig_1434-snap-gene-0.2-mRNA-1	CBS domain multi-pass transmembrane protein	NA
Module 4	maker-pcu_contig_1435-fgenesh-gene-0.0-mRNA-1	Conserved gene of unknown function	NA
Module 4	maker-pcu_contig_1435-snap-gene-0.1-mRNA-1	Protein kinase	NA
Module 4	maker-pcu_contig_14371-snap-gene-0.0-mRNA-1	Conserved gene of unknown function	NA
Module 4	maker-pcu_contig_1438-fgenesh-gene-0.1-mRNA-1	Conserved gene of unknown function	NA
Module 4	maker-pcu_contig_14388-snap-gene-0.1-mRNA-1	Histone H2A	NA
Module 4	maker-pcu_contig_144-snap-gene-0.9-mRNA-1	NB-ARC domain protein	NA
Module 4	maker-pcu_contig_1445-snap-gene-0.1-mRNA-1	Ribosomal protein L36	NA
Module 4	maker-pcu_contig_1446-snap-gene-0.2-mRNA-1	DNA primase	NA
Module 4	maker-pcu_contig_1449-snap-gene-0.5-mRNA-1	Chromosome 02 contig 1, DNA sequence	NA
Module 4	maker-pcu_contig_146-snap-gene-0.19-mRNA-1	Conserved gene of unknown function	NA
Module 4	maker-pcu_contig_14604-snap-gene-0.0-mRNA-1	Metalloprotease family M01	NA
Module 4	maker-pcu_contig_14613-fgenesh-gene-0.0-mRNA-1	WD40-like domain-containing protein	NA
Module 4	maker-pcu_contig_14630-snap-gene-0.0-mRNA-1	CRN-like CRN8	NA
Module 4	maker-pcu_contig_14638-snap-gene-0.1-mRNA-1	Conserved gene of unknown function	NA
Module 4	maker-pcu_contig_1464-snap-gene-0.1-mRNA-1	Beta-glucan synthesis-associated protein	NA
Module 4	maker-pcu_contig_147-snap-gene-0.12-mRNA-1	Alcohol dehydrogenase	NA
Module 4	maker-pcu_contig_14719-fgenesh-gene-0.0-mRNA-1	U3 snoRNP-associated protein Utp7	NA
Module 4	maker-pcu_contig_14727-snap-gene-0.0-mRNA-1	Glucanase inhibitor protein 1	NA
Module 4	maker-pcu_contig_1473-snap-gene-0.5-mRNA-1	Gene of unknown function	NA
Module 4	maker-pcu_contig_14762-snap-gene-0.0-mRNA-1	Exonuclease	NA
Module 4	maker-pcu_contig_1485-snap-gene-0.1-mRNA-1	Metal Ion (Mn2-iron) Transporter (Nramp) Family	NA
Module 4	maker-pcu_contig_1487-fgenesh-gene-0.0-mRNA-1	Trafficking protein particle complex subunit 2	NA
Module 4	maker-pcu_contig_149-snap-gene-0.11-mRNA-1	Conserved gene of unknown function	NA
Module 4	maker-pcu_contig_1498-snap-gene-0.5-mRNA-1	Methyltransferase WBSCR22	NA
Module 4	maker-pcu_contig_1499-snap-gene-0.2-mRNA-1	Cystathionine beta-synthase	NA
Module 4	maker-pcu_contig_14997-snap-gene-0.0-mRNA-1	Disease resistance protein	NA
Module 4	maker-pcu_contig_15-snap-gene-0.22-mRNA-1	Afadin-and alpha-actinin-binding protein	NA
Module 4	maker-pcu_contig_15-snap-gene-0.26-mRNA-1	Conserved gene of unknown function	NA
Module 4	maker-pcu_contig_15-snap-gene-0.27-mRNA-1	Mitogen-activated protein-binding protein-interacting protein	NA
Module 4	maker-pcu_contig_15049-fgenesh-gene-0.0-mRNA-1	GPI-anchored protein	NA
Module 4	maker-pcu_contig_1510-snap-gene-0.6-mRNA-1	Mitochondrial Tricarboxylate Carrier (MTC) Family	NA
Module 4	maker-pcu_contig_15112-fgenesh-gene-0.0-mRNA-1	Nad-dependent epimerase/dehydratase	NA
Module 4	maker-pcu_contig_1513-fgenesh-gene-0.1-mRNA-1	Proline-rich protein BstNI subfamily 3 precursor	NA
Module 4	maker-pcu_contig_1516-snap-gene-0.1-mRNA-1	Conserved gene of unknown function	NA
Module 4	maker-pcu_contig_1516-snap-gene-0.2-mRNA-1	Conserved gene of unknown function	NA
Module 4	maker-pcu_contig_1516-snap-gene-0.3-mRNA-1	GF16769	NA
Module 4	maker-pcu_contig_1516-snap-gene-0.5-mRNA-1	Qa-SNARE, SYP3/Sed5p/Syntaxin 5-type	NA
Module 4	maker-pcu_contig_15170-snap-gene-0.0-mRNA-1	Conserved gene of unknown function	NA
Module 4	maker-pcu_contig_1519-snap-gene-0.4-mRNA-1	Conserved gene of unknown function	NA
Module 4	maker-pcu_contig_152-snap-gene-0.8-mRNA-1	Conserved gene of unknown function	NA
Module 4	maker-pcu_contig_152-snap-gene-0.9-mRNA-1	Double stranded RNA binding	NA
Module 4	maker-pcu_contig_15295-snap-gene-0.0-mRNA-1	Conserved gene of unknown function	NA
Module 4	maker-pcu_contig_153-snap-gene-0.15-mRNA-1	Conserved gene of unknown function	NA
Module 4	maker-pcu_contig_15302-snap-gene-0.1-mRNA-1	Scavenger mRNA-decapping enzyme DcpS	NA
Module 4	maker-pcu_contig_1535-snap-gene-0.1-mRNA-1	Conserved gene of unknown function	NA
Module 4	maker-pcu_contig_1535-snap-gene-0.3-mRNA-1	Acyl-CoA dehydrogenase	NA
Module 4	maker-pcu_contig_15384-fgenesh-gene-0.0-mRNA-1	Exoglucanase 1	NA
Module 4	maker-pcu_contig_154-snap-gene-0.6-mRNA-1	Conserved gene of unknown function	NA
Module 4	maker-pcu_contig_154-snap-gene-0.9-mRNA-1	Conserved gene of unknown function	NA
Module 4	maker-pcu_contig_1541-snap-gene-0.1-mRNA-1	Liver stage antigen	NA
Module 4	maker-pcu_contig_1541-snap-gene-0.2-mRNA-1	Conserved gene of unknown function	NA
Module 4	maker-pcu_contig_15431-snap-gene-0.0-mRNA-1	Loricrin	NA
Module 4	maker-pcu_contig_1547-snap-gene-0.2-mRNA-1	Cobalamin synthesis protein	NA
Module 4	maker-pcu_contig_15488-snap-gene-0.0-mRNA-1	Gene of unknown function	NA
Module 4	maker-pcu_contig_155-snap-gene-0.4-mRNA-1	Chc1-b-prov protein	NA
Module 4	maker-pcu_contig_155-snap-gene-0.6-mRNA-1	Nucleolar GTP-binding protein	NA
Module 4	maker-pcu_contig_156-fgenesh-gene-0.3-mRNA-1	GRF zinc finger family protein	PF08880 (Glutamine-Leucine-Glutamine)
Module 4	maker-pcu_contig_156-snap-gene-0.15-mRNA-1	Conserved gene of unknown function	NA
Module 4	maker-pcu_contig_156-snap-gene-0.16-mRNA-1	Neurochondrin family protein	NA
Module 4	maker-pcu_contig_1564-snap-gene-0.0-mRNA-1	RING-type ubiquitin ligase of the endosomal and vacuolar membranes	NA
Module 4	maker-pcu_contig_157-snap-gene-0.10-mRNA-1	Cyclin-dependent kinase	NA
Module 4	maker-pcu_contig_157-snap-gene-0.9-mRNA-1	DNA-directed RNA polymerase I subunit RPA12	NA
Module 4	maker-pcu_contig_158-snap-gene-0.7-mRNA-1	Peroxisome assembly factor	NA
Module 4	maker-pcu_contig_1587-snap-gene-0.1-mRNA-1	Zinc finger domain protein	NA
Module 4	maker-pcu_contig_1587-snap-gene-0.2-mRNA-1	GF11974	NA
Module 4	maker-pcu_contig_15872-snap-gene-0.1-mRNA-1	P-type ATPase (P-ATPase) Superfamily	NA
Module 4	maker-pcu_contig_159-snap-gene-0.12-mRNA-1	Growth inhibitory protein	NA
Module 4	maker-pcu_contig_159-snap-gene-0.14-mRNA-1	High mobility group protein B1	NA
Module 4	maker-pcu_contig_1590-fgenesh-gene-0.1-mRNA-1	Conserved gene of unknown function	NA
Module 4	maker-pcu_contig_1590-snap-gene-0.2-mRNA-1	Cca1b circadian clock protein CCA1b	PF00249(Myb, DNA-binding)
Module 4	maker-pcu_contig_1594-fgenesh-gene-0.1-mRNA-1	Coiled-coil domain containing 86	NA
Module 4	maker-pcu_contig_1594-snap-gene-0.9-mRNA-1	Mitochondrial Carrier (MC) Family	NA
Module 4	maker-pcu_contig_16-snap-gene-0.19-mRNA-1	NmrA family protein	NA
Module 4	maker-pcu_contig_16-snap-gene-0.8-mRNA-1	Axonemal Inner Arm I1 Intermediate Chain Dynein	NA
Module 4	maker-pcu_contig_1605-snap-gene-0.1-mRNA-1	Amino Acid/Auxin Permease (AAAP) Family	NA
Module 4	maker-pcu_contig_161-snap-gene-0.14-mRNA-1	Tyrosinase	NA
Module 4	maker-pcu_contig_1612-snap-gene-0.2-mRNA-1	Ankyrin	NA
Module 4	maker-pcu_contig_1612-snap-gene-0.3-mRNA-1	Mitochondrial Carrier (MC) Family	NA
Module 4	maker-pcu_contig_16197-snap-gene-0.1-mRNA-1	Protein kinase	NA
Module 4	maker-pcu_contig_162-fgenesh-gene-0.0-mRNA-1	Conserved gene of unknown function	NA
Module 4	maker-pcu_contig_162-snap-gene-0.21-mRNA-1	Tyrosine-protein phosphatase OCA1	NA
Module 4	maker-pcu_contig_162-snap-gene-0.23-mRNA-1	Vertebrate vacuolar protein sorting 72 (Yeast)	NA
Module 4	maker-pcu_contig_16262-snap-gene-0.0-mRNA-1	Secreted RxLR effector peptide protein	NA
Module 4	maker-pcu_contig_163-snap-gene-0.8-mRNA-1	12-oxophytodienoate reductase	NA
Module 4	maker-pcu_contig_163-snap-gene-0.9-mRNA-1	Palmitoyltransferase	NA
Module 4	maker-pcu_contig_16317-snap-gene-0.1-mRNA-1	Conserved gene of unknown function	NA
Module 4	maker-pcu_contig_1637-snap-gene-0.5-mRNA-1	Conserved gene of unknown function	NA
Module 4	maker-pcu_contig_1638-snap-gene-0.5-mRNA-1	Conserved gene of unknown function	NA
Module 4	maker-pcu_contig_164-snap-gene-0.1-mRNA-1	Serine proteinase inhibitor (KU family)	NA
Module 4	maker-pcu_contig_1642-snap-gene-0.2-mRNA-1	Crinkler (CRN) family protein	NA
Module 4	maker-pcu_contig_16582-fgenesh-gene-0.0-mRNA-1	Gene of unknown function	NA
Module 4	maker-pcu_contig_166-snap-gene-0.12-mRNA-1	Conserved gene of unknown function	NA
Module 4	maker-pcu_contig_1662-fgenesh-gene-0.0-mRNA-1	DNA replication complex GINS protein PSF1	NA
Module 4	maker-pcu_contig_1663-snap-gene-0.2-mRNA-1	P-type ATPase (P-ATPase) Superfamily	NA
Module 4	maker-pcu_contig_16660-snap-gene-0.0-mRNA-1	Secreted RxLR effector peptide protein	NA
Module 4	maker-pcu_contig_1667-snap-gene-0.7-mRNA-1	Conserved gene of unknown function	NA
Module 4	maker-pcu_contig_167-snap-gene-0.7-mRNA-1	Conserved gene of unknown function	NA
Module 4	maker-pcu_contig_167-snap-gene-0.9-mRNA-1	Ankyrin	NA
Module 4	maker-pcu_contig_16793-snap-gene-0.0-mRNA-1	Conserved gene of unknown function	NA
Module 4	maker-pcu_contig_168-snap-gene-0.13-mRNA-1	Craniofacial development protein 1	NA
Module 4	maker-pcu_contig_1688-snap-gene-0.1-mRNA-1	RAS p21 protein activator 3	NA
Module 4	maker-pcu_contig_169-fgenesh-gene-0.1-mRNA-1	Uracil phosphoribosyltransferase	NA
Module 4	maker-pcu_contig_16936-snap-gene-0.0-mRNA-1	Crinkler (CRN) family protein	NA
Module 4	maker-pcu_contig_17-fgenesh-gene-0.6-mRNA-1	Ferredoxin, 2Fe-2S	NA
Module 4	maker-pcu_contig_17-snap-gene-0.18-mRNA-1	Conserved gene of unknown function	NA
Module 4	maker-pcu_contig_17-snap-gene-0.23-mRNA-1	Conserved gene of unknown function	NA
Module 4	maker-pcu_contig_17-snap-gene-0.27-mRNA-1	DEAD/DEAH box RNA helicase	NA
Module 4	maker-pcu_contig_17073-snap-gene-0.0-mRNA-1	Conserved gene of unknown function	NA
Module 4	maker-pcu_contig_17085-snap-gene-0.1-mRNA-1	Conserved gene of unknown function	NA
Module 4	maker-pcu_contig_1726-snap-gene-0.0-mRNA-1	Conserved gene of unknown function	NA
Module 4	maker-pcu_contig_173-snap-gene-0.8-mRNA-1	Rab gdp/gtp exchange factor	NA
Module 4	maker-pcu_contig_1733-snap-gene-0.3-mRNA-1	Cell division cycle protein 48	NA
Module 4	maker-pcu_contig_1736-fgenesh-gene-0.0-mRNA-1	Conserved gene of unknown function	NA
Module 4	maker-pcu_contig_17388-snap-gene-0.0-mRNA-1	Conserved gene of unknown function	NA
Module 4	maker-pcu_contig_1740-snap-gene-0.5-mRNA-1	Conserved gene of unknown function	NA
Module 4	maker-pcu_contig_17425-snap-gene-0.0-mRNA-1	Methylthioribose-1-phosphate isomerase	NA
Module 4	maker-pcu_contig_1743-snap-gene-0.1-mRNA-1	PcF and SCR74-like cys-rich secreted peptide	NA
Module 4	maker-pcu_contig_1745-fgenesh-gene-0.0-mRNA-1	POU class 6, partial	NA
Module 4	maker-pcu_contig_1745-snap-gene-0.6-mRNA-1	BolA	NA
Module 4	maker-pcu_contig_1747-snap-gene-0.3-mRNA-1	Peroxisome assembly protein	NA
Module 4	maker-pcu_contig_1747-snap-gene-0.5-mRNA-1	Nuclear nucleic acid-binding protein C1D	NA
Module 4	maker-pcu_contig_17509-snap-gene-0.0-mRNA-1	Nuclear pore complex protein	NA
Module 4	maker-pcu_contig_17518-snap-gene-0.0-mRNA-1	Telomere length regulation protein TEL2	NA
Module 4	maker-pcu_contig_1752-snap-gene-0.4-mRNA-1	Molybdenum cofactor synthesis protein	NA
Module 4	maker-pcu_contig_1758-snap-gene-0.2-mRNA-1	Conserved gene of unknown function	NA
Module 4	maker-pcu_contig_176-snap-gene-0.10-mRNA-1	Conserved gene of unknown function	NA
Module 4	maker-pcu_contig_1769-snap-gene-0.5-mRNA-1	Protein kinase	NA
Module 4	maker-pcu_contig_177-snap-gene-0.7-mRNA-1	Conserved gene of unknown function	NA
Module 4	maker-pcu_contig_17713-snap-gene-0.1-mRNA-1	Poly(A) polymerase	NA
Module 4	maker-pcu_contig_17794-snap-gene-0.0-mRNA-1	Glutathione peroxidase	NA
Module 4	maker-pcu_contig_178-snap-gene-0.7-mRNA-1	Tetratricopeptide repeat protein 26	NA
Module 4	maker-pcu_contig_178-snap-gene-0.8-mRNA-1	Der1-like family	NA
Module 4	maker-pcu_contig_1780-snap-gene-0.1-mRNA-1	Protein-L-isoaspartate(D-aspartate) O-methyltransferase	NA
Module 4	maker-pcu_contig_1783-snap-gene-0.10-mRNA-1	Trafficking protein particle complex subunit 2	NA
Module 4	maker-pcu_contig_1784-snap-gene-0.4-mRNA-1	D-glycerate 3-kinase, chloroplast	NA
Module 4	maker-pcu_contig_17866-snap-gene-0.1-mRNA-1	Conserved gene of unknown function	NA
Module 4	maker-pcu_contig_179-fgenesh-gene-0.1-mRNA-1	C2 domain-containing protein	NA
Module 4	maker-pcu_contig_1793-snap-gene-0.4-mRNA-1	ATP synthase mitochondrial F1 complex assembly factor 2	NA
Module 4	maker-pcu_contig_18-snap-gene-0.14-mRNA-1	Gene of unknown function	NA
Module 4	maker-pcu_contig_180-fgenesh-gene-0.4-mRNA-1	Conserved gene of unknown function	NA
Module 4	maker-pcu_contig_180-snap-gene-0.10-mRNA-1	Conserved gene of unknown function	NA
Module 4	maker-pcu_contig_180-snap-gene-0.14-mRNA-1	Bcs1 aaa-type ATPase	NA
Module 4	maker-pcu_contig_1803-snap-gene-0.1-mRNA-1	Mitogen-activated protein kinase	NA
Module 4	maker-pcu_contig_1805-snap-gene-0.2-mRNA-1	Bzip transcription factor	PF00170(bZIP transcription factor, bZIP-1)
Module 4	maker-pcu_contig_1809-fgenesh-gene-0.1-mRNA-1	Conserved gene of unknown function	NA
Module 4	maker-pcu_contig_181-snap-gene-0.22-mRNA-1	Conserved gene of unknown function	NA
Module 4	maker-pcu_contig_181-snap-gene-0.9-mRNA-1	ATP synthase assembly protein Atp10	NA
Module 4	maker-pcu_contig_1810-snap-gene-0.4-mRNA-1	Conserved gene of unknown function	NA
Module 4	maker-pcu_contig_1821-snap-gene-0.2-mRNA-1	Cytochrome P450	NA
Module 4	maker-pcu_contig_1823-snap-gene-0.5-mRNA-1	DNA polymerase alpha-associated DNA helicase A	NA
Module 4	maker-pcu_contig_1825-snap-gene-0.4-mRNA-1	Conserved gene of unknown function	NA
Module 4	maker-pcu_contig_18267-snap-gene-0.0-mRNA-1	Pectinesterase	NA
Module 4	maker-pcu_contig_1828-snap-gene-0.1-mRNA-1	Heat shock protein 40/ DnaJ domain containing protein	NA
Module 4	maker-pcu_contig_1839-snap-gene-0.3-mRNA-1	Fidgetin	NA
Module 4	maker-pcu_contig_1839-snap-gene-0.4-mRNA-1	Kelch repeat protein	NA
Module 4	maker-pcu_contig_1858-snap-gene-0.8-mRNA-1	Sir2 family protein	NA
Module 4	maker-pcu_contig_186-fgenesh-gene-0.4-mRNA-1	Conserved gene of unknown function	NA
Module 4	maker-pcu_contig_186-snap-gene-0.10-mRNA-1	Conserved gene of unknown function	NA
Module 4	maker-pcu_contig_186-snap-gene-0.13-mRNA-1	Conserved gene of unknown function	NA
Module 4	maker-pcu_contig_186-snap-gene-0.17-mRNA-1	Conserved gene of unknown function	NA
Module 4	maker-pcu_contig_186-snap-gene-0.6-mRNA-1	C2H2 zinc finger protein	NA
Module 4	maker-pcu_contig_1865-snap-gene-0.3-mRNA-1	Calmodulin	NA
Module 4	maker-pcu_contig_187-snap-gene-0.10-mRNA-1	Calcineurin-like phosphoesterase	NA
Module 4	maker-pcu_contig_187-snap-gene-0.6-mRNA-1	U2 snRNP component IST3	NA
Module 4	maker-pcu_contig_18717-snap-gene-0.0-mRNA-1	Conserved gene of unknown function	NA
Module 4	maker-pcu_contig_1875-snap-gene-0.1-mRNA-1	Centriole proteome protein	NA
Module 4	maker-pcu_contig_18760-snap-gene-0.1-mRNA-1	PP2C phosphatase	NA
Module 4	maker-pcu_contig_1878-snap-gene-0.3-mRNA-1	Secreted RxLR effector peptide protein	NA
Module 4	maker-pcu_contig_188-snap-gene-0.21-mRNA-1	Kynurenine-oxoglutarate transaminase	NA
Module 4	maker-pcu_contig_18883-snap-gene-0.0-mRNA-1	SCP-like extracellular protein	NA
Module 4	maker-pcu_contig_1891-snap-gene-0.3-mRNA-1	Gene of unknown function	NA
Module 4	maker-pcu_contig_1891-snap-gene-0.4-mRNA-1	Gene of unknown function	NA
Module 4	maker-pcu_contig_18923-snap-gene-0.1-mRNA-1	Conserved gene of unknown function	NA
Module 4	maker-pcu_contig_18956-snap-gene-0.0-mRNA-1	NPP1	NA
Module 4	maker-pcu_contig_19-fgenesh-gene-0.0-mRNA-1	Serine protease family S01A	NA
Module 4	maker-pcu_contig_19-snap-gene-0.13-mRNA-1	Isoform 4 of Protein NLRC3	NA
Module 4	maker-pcu_contig_19-snap-gene-0.16-mRNA-1	Conserved gene of unknown function	NA
Module 4	maker-pcu_contig_19-snap-gene-0.22-mRNA-1	Spindle assembly protein	NA
Module 4	maker-pcu_contig_19-snap-gene-0.24-mRNA-1	Cyclin	NA
Module 4	maker-pcu_contig_19-snap-gene-0.26-mRNA-1	SGT1	NA
Module 4	maker-pcu_contig_19-snap-gene-0.31-mRNA-1	Ankyrin	NA
Module 4	maker-pcu_contig_190-snap-gene-0.9-mRNA-1	Gene of unknown function	NA
Module 4	maker-pcu_contig_1901-snap-gene-0.2-mRNA-1	Impact	NA
Module 4	maker-pcu_contig_19053-fgenesh-gene-0.0-mRNA-1	RNA pseudouridine synthase	NA
Module 4	maker-pcu_contig_1907-snap-gene-0.2-mRNA-1	Serine protease family S09X	NA
Module 4	maker-pcu_contig_192-fgenesh-gene-0.1-mRNA-1	Serum/glucocorticoid regulated kinase 3	NA
Module 4	maker-pcu_contig_192-snap-gene-0.9-mRNA-1	Gene of unknown function	NA
Module 4	maker-pcu_contig_19239-snap-gene-0.0-mRNA-1	ATP-binding Cassette (ABC) Superfamily	NA
Module 4	maker-pcu_contig_1938-snap-gene-0.2-mRNA-1	GJ16916	NA
Module 4	maker-pcu_contig_1945-snap-gene-0.1-mRNA-1	Conserved gene of unknown function	NA
Module 4	maker-pcu_contig_195-snap-gene-0.11-mRNA-1	Glutathione peroxidase	NA
Module 4	maker-pcu_contig_195-snap-gene-0.7-mRNA-1	Gene of unknown function	NA
Module 4	maker-pcu_contig_1952-snap-gene-0.0-mRNA-1	Protein kinase	NA
Module 4	maker-pcu_contig_19572-snap-gene-0.0-mRNA-1	Conserved gene of unknown function	NA
Module 4	maker-pcu_contig_196-snap-gene-0.10-mRNA-1	Ubiquitin carrier protein	NA
Module 4	maker-pcu_contig_19625-snap-gene-0.0-mRNA-1	Conserved gene of unknown function	NA
Module 4	maker-pcu_contig_1963-snap-gene-0.4-mRNA-1	Conserved gene of unknown function	NA
Module 4	maker-pcu_contig_1969-snap-gene-0.1-mRNA-1	Glyoxylate reductase/hydroxypyruvate reductase	NA
Module 4	maker-pcu_contig_197-snap-gene-0.12-mRNA-1	Leucine rich repeat containing proteins	NA
Module 4	maker-pcu_contig_197-snap-gene-0.7-mRNA-1	Aminoglycoside phosphotransferase	NA
Module 4	maker-pcu_contig_19729-snap-gene-0.0-mRNA-1	Phosphatidylinositol kinase (PIK-F)	NA
Module 4	maker-pcu_contig_1973-snap-gene-0.6-mRNA-1	Gene of unknown function	NA
Module 4	maker-pcu_contig_198-snap-gene-0.7-mRNA-1	Sister chromatid cohesion protein DCC1	NA
Module 4	maker-pcu_contig_19894-snap-gene-0.1-mRNA-1	Ubiquitin-conjugating enzyme E2	NA
Module 4	maker-pcu_contig_199-snap-gene-0.12-mRNA-1	Conserved gene of unknown function	NA
Module 4	maker-pcu_contig_199-snap-gene-0.7-mRNA-1	Gene of unknown function	NA
Module 4	maker-pcu_contig_1991-fgenesh-gene-0.1-mRNA-1	Conserved gene of unknown function	NA
Module 4	maker-pcu_contig_1991-snap-gene-0.5-mRNA-1	Coiled-coil domain-containing protein 94	NA
Module 4	maker-pcu_contig_2-fgenesh-gene-0.18-mRNA-1	Monooxygenase	NA
Module 4	maker-pcu_contig_2-snap-gene-0.35-mRNA-1	Conserved gene of unknown function	NA
Module 4	maker-pcu_contig_2-snap-gene-0.40-mRNA-1	Protein preY, mitochondrial precursor.	NA
Module 4	maker-pcu_contig_20-snap-gene-0.18-mRNA-1	MRNA, clone: RAFL24-05-D16	NA
Module 4	maker-pcu_contig_20-snap-gene-0.24-mRNA-1	Major Facilitator Superfamily (MFS)	NA
Module 4	maker-pcu_contig_20008-snap-gene-0.0-mRNA-1	Conserved gene of unknown function	NA
Module 4	maker-pcu_contig_2002-snap-gene-0.4-mRNA-1	Conserved gene of unknown function	NA
Module 4	maker-pcu_contig_201-snap-gene-0.12-mRNA-1	Inversin protein alternative isoform	NA
Module 4	maker-pcu_contig_201-snap-gene-0.16-mRNA-1	Conserved gene of unknown function	NA
Module 4	maker-pcu_contig_201-snap-gene-0.6-mRNA-1	Conserved gene of unknown function	NA
Module 4	maker-pcu_contig_2013-snap-gene-0.6-mRNA-1	Conserved gene of unknown function	NA
Module 4	maker-pcu_contig_20186-snap-gene-0.1-mRNA-1	Apicomplexan specific Pf 23612804 and Py 23478322	NA
Module 4	maker-pcu_contig_20208-snap-gene-0.1-mRNA-1	Conserved gene of unknown function	NA
Module 4	maker-pcu_contig_20216-snap-gene-0.0-mRNA-1	Conserved gene of unknown function	NA
Module 4	maker-pcu_contig_2033-snap-gene-0.3-mRNA-1	Response regulator receiver protein	NA
Module 4	maker-pcu_contig_204-snap-gene-0.19-mRNA-1	SEC14-like 2	NA
Module 4	maker-pcu_contig_20438-snap-gene-0.0-mRNA-1	RNase H family protein	NA
Module 4	maker-pcu_contig_20443-snap-gene-0.1-mRNA-1	Cullin family protein	NA
Module 4	maker-pcu_contig_2053-snap-gene-0.2-mRNA-1	Conserved gene of unknown function	NA
Module 4	maker-pcu_contig_206-snap-gene-0.6-mRNA-1	Guanine nucleotide-binding protein-like 3	NA
Module 4	maker-pcu_contig_2063-snap-gene-0.2-mRNA-1	WD40 repeat domain-containing protein	NA
Module 4	maker-pcu_contig_2065-snap-gene-0.3-mRNA-1	Conserved gene of unknown function	NA
Module 4	maker-pcu_contig_2072-snap-gene-0.3-mRNA-1	CG5013-PA	NA
Module 4	maker-pcu_contig_20725-snap-gene-0.0-mRNA-1	Secreted RxLR effector peptide protein	NA
Module 4	maker-pcu_contig_208-snap-gene-0.10-mRNA-1	Conserved gene of unknown function	NA
Module 4	maker-pcu_contig_2083-snap-gene-0.1-mRNA-1	Kinesin heavy chain	NA
Module 4	maker-pcu_contig_2084-fgenesh-gene-0.0-mRNA-1	Translation initiation factor eIF-2B subunit alpha	NA
Module 4	maker-pcu_contig_20879-snap-gene-0.1-mRNA-1	Conserved gene of unknown function	NA
Module 4	maker-pcu_contig_21-snap-gene-0.25-mRNA-1	Gamma-tubulin complex component	NA
Module 4	maker-pcu_contig_2100-snap-gene-0.2-mRNA-1	START domain containing protein	NA
Module 4	maker-pcu_contig_2103-snap-gene-0.0-mRNA-1	GAF domain-containing protein	NA
Module 4	maker-pcu_contig_21035-snap-gene-0.0-mRNA-1	Crinkler (CRN) family protein	NA
Module 4	maker-pcu_contig_21087-snap-gene-0.0-mRNA-1	ATP-binding Cassette (ABC) Superfamily	NA
Module 4	maker-pcu_contig_211-snap-gene-0.7-mRNA-1	Syntaxin	NA
Module 4	maker-pcu_contig_21125-snap-gene-0.0-mRNA-1	2-oxoglutarate dehydrogenase	NA
Module 4	maker-pcu_contig_21180-snap-gene-0.0-mRNA-1	Calcineurin-like phosphoesterase	NA
Module 4	maker-pcu_contig_212-snap-gene-0.11-mRNA-1	Dolichyl pyrophosphate Glc1Man9GlcNAc2 alpha-1,3-glucosyltransferase	NA
Module 4	maker-pcu_contig_21207-snap-gene-0.0-mRNA-1	Rab3 GTPase-activating protein catalytic subunit	NA
Module 4	maker-pcu_contig_2121-snap-gene-0.3-mRNA-1	RRNA methyltransferase	NA
Module 4	maker-pcu_contig_21267-snap-gene-0.0-mRNA-1	NPP1	NA
Module 4	maker-pcu_contig_213-snap-gene-0.11-mRNA-1	Peptide release factor	NA
Module 4	maker-pcu_contig_2131-fgenesh-gene-0.1-mRNA-1	Surfeit 2	NA
Module 4	maker-pcu_contig_2136-snap-gene-0.3-mRNA-1	Conserved gene of unknown function	NA
Module 4	maker-pcu_contig_21372-snap-gene-0.0-mRNA-1	Transcription initiation factor TFIID subunit	PF03540(Transcription initiation factor TFIID, 23-30kDa subunit)
Module 4	maker-pcu_contig_2138-snap-gene-0.6-mRNA-1	ApaG domain protein	NA
Module 4	maker-pcu_contig_2140-snap-gene-0.3-mRNA-1	Conserved gene of unknown function	NA
Module 4	maker-pcu_contig_2140-snap-gene-0.5-mRNA-1	Protein FAM119A (Hepatocellular carcinoma-associated antigen 557b).	NA
Module 4	maker-pcu_contig_2144-snap-gene-0.3-mRNA-1	Gpr11	NA
Module 4	maker-pcu_contig_215-snap-gene-0.12-mRNA-1	Ribonuclease P protein subunit p30	NA
Module 4	maker-pcu_contig_215-snap-gene-0.9-mRNA-1	Gene of unknown function	NA
Module 4	maker-pcu_contig_21544-snap-gene-0.0-mRNA-1	Glutamyl-tRNA synthetase	NA
Module 4	maker-pcu_contig_216-snap-gene-0.10-mRNA-1	Conserved gene of unknown function	NA
Module 4	maker-pcu_contig_216-snap-gene-0.14-mRNA-1	Liver stage antigen	NA
Module 4	maker-pcu_contig_2163-snap-gene-0.6-mRNA-1	Gamma-butyrobetaine dioxygenase	NA
Module 4	maker-pcu_contig_2171-snap-gene-0.1-mRNA-1	Conserved gene of unknown function	NA
Module 4	maker-pcu_contig_2188-snap-gene-0.3-mRNA-1	DEHA2F07062p	NA
Module 4	maker-pcu_contig_2198-snap-gene-0.0-mRNA-1	Conserved gene of unknown function	NA
Module 4	maker-pcu_contig_220-fgenesh-gene-0.1-mRNA-1	RWD domain-containing protein 3	NA
Module 4	maker-pcu_contig_2203-snap-gene-0.1-mRNA-1	Conserved gene of unknown function	NA
Module 4	maker-pcu_contig_221-fgenesh-gene-0.2-mRNA-1	Conserved gene of unknown function	NA
Module 4	maker-pcu_contig_221-snap-gene-0.12-mRNA-1	Pre-mRNA-splicing factor syf2	NA
Module 4	maker-pcu_contig_221-snap-gene-0.16-mRNA-1	Conserved gene of unknown function	NA
Module 4	maker-pcu_contig_221-snap-gene-0.18-mRNA-1	Histone-lysine N-methyltransferase	NA
Module 4	maker-pcu_contig_2212-snap-gene-0.1-mRNA-1	Hydrolase, TatD family protein	NA
Module 4	maker-pcu_contig_2214-snap-gene-0.3-mRNA-1	Conserved gene of unknown function	NA
Module 4	maker-pcu_contig_222-fgenesh-gene-0.0-mRNA-1	Ribosome production factor 1	NA
Module 4	maker-pcu_contig_222-snap-gene-0.13-mRNA-1	Conserved gene of unknown function	NA
Module 4	maker-pcu_contig_22237-snap-gene-0.0-mRNA-1	LETM1 domain-containing protein 1	NA
Module 4	maker-pcu_contig_22278-snap-gene-0.0-mRNA-1	NPP1	NA
Module 4	maker-pcu_contig_22282-snap-gene-0.0-mRNA-1	Conserved oligomeric Golgi complex subunit	NA
Module 4	maker-pcu_contig_2232-snap-gene-0.2-mRNA-1	ADP-ribosylation factor, arf	NA
Module 4	maker-pcu_contig_2250-snap-gene-0.3-mRNA-1	Nuclear transcription factor Y subunit	PF00808(Transcription factor CBF/NF-Y/archaeal histone)
Module 4	maker-pcu_contig_2252-snap-gene-0.2-mRNA-1	Protein kinase	NA
Module 4	maker-pcu_contig_2258-fgenesh-gene-0.0-mRNA-1	Conserved gene of unknown function	NA
Module 4	maker-pcu_contig_2260-snap-gene-0.2-mRNA-1	Conserved gene of unknown function	NA
Module 4	maker-pcu_contig_227-snap-gene-0.7-mRNA-1	Mediator of RNA polymerase II transcription	PF04563 (RNA polymerase, beta subunit)
Module 4	maker-pcu_contig_2272-snap-gene-0.0-mRNA-1	Anaphase-promoting complex subunit	NA
Module 4	maker-pcu_contig_2279-snap-gene-0.3-mRNA-1	Acyl-CoA desaturase 1	NA
Module 4	maker-pcu_contig_228-snap-gene-0.12-mRNA-1	Nudix (Nucleoside diphosphate linked moiety X)-type motif 22	NA
Module 4	maker-pcu_contig_2281-snap-gene-0.5-mRNA-1	Mitochondrial Carrier (MC) Family	NA
Module 4	maker-pcu_contig_229-fgenesh-gene-0.2-mRNA-1	Zinc finger protein matrin type	NA
Module 4	maker-pcu_contig_22919-snap-gene-0.1-mRNA-1	Diacylglycerol kinase	NA
Module 4	maker-pcu_contig_2293-snap-gene-0.3-mRNA-1	Conserved gene of unknown function	NA
Module 4	maker-pcu_contig_23-snap-gene-0.27-mRNA-1	Rad52/22 domain-containing protein	NA
Module 4	maker-pcu_contig_23000-snap-gene-0.0-mRNA-1	Conserved gene of unknown function	NA
Module 4	maker-pcu_contig_2303-snap-gene-0.0-mRNA-1	NOL1/NOP2/Sun family protein	NA
Module 4	maker-pcu_contig_2308-snap-gene-0.1-mRNA-1	Conserved gene of unknown function	NA
Module 4	maker-pcu_contig_231-fgenesh-gene-0.5-mRNA-1	Something about silencing protein sas10	NA
Module 4	maker-pcu_contig_231-snap-gene-0.16-mRNA-1	Nitroreductase family	NA
Module 4	maker-pcu_contig_231-snap-gene-0.24-mRNA-1	U6 snRNA-associated Sm LSm1 variant 1	NA
Module 4	maker-pcu_contig_2315-snap-gene-0.0-mRNA-1	CG17687 CG17687-PA	NA
Module 4	maker-pcu_contig_23207-fgenesh-gene-0.0-mRNA-1	Conserved gene of unknown function	NA
Module 4	maker-pcu_contig_23278-snap-gene-0.0-mRNA-1	Centromere protein B	PF03221(Pogo transposase / Cenp-B / PDC2, subgroup, DNA-binding HTH domain)
Module 4	maker-pcu_contig_2337-snap-gene-0.1-mRNA-1	Conserved gene of unknown function	NA
Module 4	maker-pcu_contig_234-fgenesh-gene-0.0-mRNA-1	Late embryogenesis abundant 1	NA
Module 4	maker-pcu_contig_234-snap-gene-0.12-mRNA-1	Sarcosine oxidase	NA
Module 4	maker-pcu_contig_2344-snap-gene-0.2-mRNA-1	Glycoprotein-N-acetylgalactosamine 3-beta-galactosyltransferase	NA
Module 4	maker-pcu_contig_235-snap-gene-0.17-mRNA-1	UDP-sugar transporter	NA
Module 4	maker-pcu_contig_235-snap-gene-0.18-mRNA-1	SMP-30/Gluconolaconase/LRE domain protein	NA
Module 4	maker-pcu_contig_235-snap-gene-0.7-mRNA-1	Conserved gene of unknown function	NA
Module 4	maker-pcu_contig_235-snap-gene-0.8-mRNA-1	CG5418 CG5418-PA	NA
Module 4	maker-pcu_contig_2352-snap-gene-0.4-mRNA-1	Conserved gene of unknown function	NA
Module 4	maker-pcu_contig_23569-snap-gene-0.0-mRNA-1	Conserved gene of unknown function	NA
Module 4	maker-pcu_contig_23653-snap-gene-0.0-mRNA-1	Gene of unknown function	NA
Module 4	maker-pcu_contig_237-fgenesh-gene-0.1-mRNA-1	Conserved gene of unknown function	NA
Module 4	maker-pcu_contig_23703-snap-gene-0.1-mRNA-1	Phosphatidylinositol-3,4,5-trisphosphate 3-phosphatase	NA
Module 4	maker-pcu_contig_23757-snap-gene-0.0-mRNA-1	Crinkler (CRN) family protein	NA
Module 4	maker-pcu_contig_238-snap-gene-0.9-mRNA-1	G protein-coupled receptor 89	NA
Module 4	maker-pcu_contig_2388-snap-gene-0.2-mRNA-1	Conserved gene of unknown function	NA
Module 4	maker-pcu_contig_239-snap-gene-0.17-mRNA-1	Conserved gene of unknown function	NA
Module 4	maker-pcu_contig_23922-snap-gene-0.0-mRNA-1	Conserved gene of unknown function	NA
Module 4	maker-pcu_contig_2393-snap-gene-0.3-mRNA-1	Cytosolic 5'-nucleotidase III	NA
Module 4	maker-pcu_contig_2395-snap-gene-0.2-mRNA-1	Calcineurin-like phosphoesterase	NA
Module 4	maker-pcu_contig_23976-fgenesh-gene-0.0-mRNA-1	Conserved gene of unknown function	NA
Module 4	maker-pcu_contig_241-snap-gene-0.13-mRNA-1	Pre-rRNA processing protein	NA
Module 4	maker-pcu_contig_2412-snap-gene-0.4-mRNA-1	Conserved gene of unknown function	NA
Module 4	maker-pcu_contig_2412-snap-gene-0.5-mRNA-1	Conserved gene of unknown function	NA
Module 4	maker-pcu_contig_2414-snap-gene-0.0-mRNA-1	Conserved gene of unknown function	NA
Module 4	maker-pcu_contig_2421-snap-gene-0.1-mRNA-1	Gene of unknown function	NA
Module 4	maker-pcu_contig_2425-snap-gene-0.0-mRNA-1	Conserved gene of unknown function	NA
Module 4	maker-pcu_contig_24302-snap-gene-0.0-mRNA-1	Crinkler (CRN) family protein	NA
Module 4	maker-pcu_contig_2432-snap-gene-0.3-mRNA-1	Protein kinase	NA
Module 4	maker-pcu_contig_2433-snap-gene-0.3-mRNA-1	Conserved gene of unknown function	NA
Module 4	maker-pcu_contig_24343-snap-gene-0.1-mRNA-1	Conserved gene of unknown function	NA
Module 4	maker-pcu_contig_244-snap-gene-0.5-mRNA-1	Conserved gene of unknown function	NA
Module 4	maker-pcu_contig_245-snap-gene-0.10-mRNA-1	Conserved gene of unknown function	NA
Module 4	maker-pcu_contig_2453-snap-gene-0.0-mRNA-1	Possible Myb_DNA-binding protein	PF00249(Myb, DNA-binding)
Module 4	maker-pcu_contig_246-snap-gene-0.15-mRNA-1	Conserved gene of unknown function	NA
Module 4	maker-pcu_contig_247-snap-gene-0.9-mRNA-1	Gene of unknown function	NA
Module 4	maker-pcu_contig_2471-snap-gene-0.3-mRNA-1	Conserved gene of unknown function	NA
Module 4	maker-pcu_contig_2474-snap-gene-0.3-mRNA-1	Optic atrophy 3-like	NA
Module 4	maker-pcu_contig_2474-snap-gene-0.4-mRNA-1	Ribose-phosphate pyrophosphokinase	NA
Module 4	maker-pcu_contig_248-snap-gene-0.12-mRNA-1	Amino Acid/Auxin Permease (AAAP) Family	NA
Module 4	maker-pcu_contig_249-snap-gene-0.11-mRNA-1	WD repeat domain 27	NA
Module 4	maker-pcu_contig_2494-snap-gene-0.0-mRNA-1	Conserved gene of unknown function	NA
Module 4	maker-pcu_contig_25-fgenesh-gene-0.0-mRNA-1	Inosine triphosphate pyrophosphatase	NA
Module 4	maker-pcu_contig_25-snap-gene-0.24-mRNA-1	Bardet-Biedl syndrome 2 protein	NA
Module 4	maker-pcu_contig_250-snap-gene-0.4-mRNA-1	Serine protease family S33	NA
Module 4	maker-pcu_contig_250-snap-gene-0.7-mRNA-1	Hepatocellular carcinoma-associated antigen	NA
Module 4	maker-pcu_contig_251-snap-gene-0.5-mRNA-1	Cyclic AMP receptor 3	NA
Module 4	maker-pcu_contig_2511-snap-gene-0.1-mRNA-1	Guanine nucleotide-binding protein subunit beta 1 homolog	NA
Module 4	maker-pcu_contig_25112-fgenesh-gene-0.0-mRNA-1	Thioredoxin peroxidase	NA
Module 4	maker-pcu_contig_25223-snap-gene-0.0-mRNA-1	Conserved gene of unknown function	NA
Module 4	maker-pcu_contig_2525-snap-gene-0.3-mRNA-1	Prephenate dehydratase	NA
Module 4	maker-pcu_contig_253-fgenesh-gene-0.1-mRNA-1	Conserved gene of unknown function	NA
Module 4	maker-pcu_contig_253-snap-gene-0.10-mRNA-1	Exosome complex, component CSL4	NA
Module 4	maker-pcu_contig_253-snap-gene-0.17-mRNA-1	Tetratricopeptide TPR2	NA
Module 4	maker-pcu_contig_2535-snap-gene-0.1-mRNA-1	Conserved gene of unknown function	NA
Module 4	maker-pcu_contig_2537-snap-gene-0.1-mRNA-1	Conserved gene of unknown function	NA
Module 4	maker-pcu_contig_254-snap-gene-0.7-mRNA-1	Conserved gene of unknown function	NA
Module 4	maker-pcu_contig_2546-fgenesh-gene-0.1-mRNA-1	Conserved gene of unknown function	NA
Module 4	maker-pcu_contig_2546-snap-gene-0.2-mRNA-1	Protein phosphatases pp1 regulatory subunit	NA
Module 4	maker-pcu_contig_25493-snap-gene-0.0-mRNA-1	Thioredoxin H-type	NA
Module 4	maker-pcu_contig_256-fgenesh-gene-0.4-mRNA-1	Aspartic protease	NA
Module 4	maker-pcu_contig_256-snap-gene-0.15-mRNA-1	ER degradation-enhancing alpha-mannosidase	NA
Module 4	maker-pcu_contig_25608-fgenesh-gene-0.0-mRNA-1	Glutathione synthetase	NA
Module 4	maker-pcu_contig_2566-snap-gene-0.2-mRNA-1	Conserved gene of unknown function	NA
Module 4	maker-pcu_contig_2566-snap-gene-0.3-mRNA-1	Acyl-CoA-binding domain-containing protein	NA
Module 4	maker-pcu_contig_2566-snap-gene-0.4-mRNA-1	Homocysteine S-methyltransferase family protein	NA
Module 4	maker-pcu_contig_25731-fgenesh-gene-0.0-mRNA-1	Conserved gene of unknown function	NA
Module 4	maker-pcu_contig_25750-snap-gene-0.1-mRNA-1	U3 small nucleolar RNA-associated protein	NA
Module 4	maker-pcu_contig_25760-snap-gene-0.0-mRNA-1	Cytochrome P450	NA
Module 4	maker-pcu_contig_258-snap-gene-0.5-mRNA-1	Conserved gene of unknown function	NA
Module 4	maker-pcu_contig_259-snap-gene-0.11-mRNA-1	Conserved gene of unknown function	NA
Module 4	maker-pcu_contig_25929-snap-gene-0.0-mRNA-1	Conserved gene of unknown function	NA
Module 4	maker-pcu_contig_2597-snap-gene-0.0-mRNA-1	Disease resistance protein	NA
Module 4	maker-pcu_contig_25986-fgenesh-gene-0.0-mRNA-1	Conserved gene of unknown function	NA
Module 4	maker-pcu_contig_26-snap-gene-0.19-mRNA-1	Conserved gene of unknown function	NA
Module 4	maker-pcu_contig_26-snap-gene-0.20-mRNA-1	Conserved gene of unknown function	NA
Module 4	maker-pcu_contig_2613-snap-gene-0.3-mRNA-1	Syntaxin 6	NA
Module 4	maker-pcu_contig_2613-snap-gene-0.4-mRNA-1	Conserved gene of unknown function	NA
Module 4	maker-pcu_contig_262-snap-gene-0.4-mRNA-1	Conserved gene of unknown function	NA
Module 4	maker-pcu_contig_2622-snap-gene-0.3-mRNA-1	Hsp70-interacting protein	NA
Module 4	maker-pcu_contig_2624-snap-gene-0.3-mRNA-1	TATA-box-binding protein	PF00352(TATA-box binding)
Module 4	maker-pcu_contig_264-snap-gene-0.11-mRNA-1	DNA replication licensing factor MCM9	NA
Module 4	maker-pcu_contig_265-snap-gene-0.12-mRNA-1	Conserved gene of unknown function	NA
Module 4	maker-pcu_contig_2657-snap-gene-0.4-mRNA-1	Gene of unknown function	NA
Module 4	maker-pcu_contig_26697-snap-gene-0.0-mRNA-1	Amino Acid-Polyamine-Organocation (APC) Family	NA
Module 4	maker-pcu_contig_267-snap-gene-0.12-mRNA-1	Protein trm112	NA
Module 4	maker-pcu_contig_267-snap-gene-0.13-mRNA-1	Conserved gene of unknown function	NA
Module 4	maker-pcu_contig_267-snap-gene-0.9-mRNA-1	Complex I intermediate-associated protein 30, mitochondrial	NA
Module 4	maker-pcu_contig_2674-snap-gene-0.0-mRNA-1	Protein kinase	NA
Module 4	maker-pcu_contig_2688-snap-gene-0.2-mRNA-1	KIN, antigenic determinant of recA protein homolog	NA
Module 4	maker-pcu_contig_2696-snap-gene-0.2-mRNA-1	Conserved gene of unknown function	NA
Module 4	maker-pcu_contig_27-snap-gene-0.7-mRNA-1	Protein kinase	NA
Module 4	maker-pcu_contig_272-snap-gene-0.5-mRNA-1	Conserved gene of unknown function	NA
Module 4	maker-pcu_contig_27253-snap-gene-0.0-mRNA-1	Canalicular multispecific organic anion transporter	NA
Module 4	maker-pcu_contig_2731-fgenesh-gene-0.0-mRNA-1	Lipoate-protein ligase A	NA
Module 4	maker-pcu_contig_27338-snap-gene-0.0-mRNA-1	Pentapeptide repeat protein	NA
Module 4	maker-pcu_contig_2742-fgenesh-gene-0.0-mRNA-1	Nitroreductase	NA
Module 4	maker-pcu_contig_2748-snap-gene-0.1-mRNA-1	Conserved gene of unknown function	NA
Module 4	maker-pcu_contig_275-snap-gene-0.10-mRNA-1	Lipase	NA
Module 4	maker-pcu_contig_275-snap-gene-0.11-mRNA-1	Chromosome 14 contig 1, DNA sequence	NA
Module 4	maker-pcu_contig_275-snap-gene-0.16-mRNA-1	Conserved gene of unknown function	NA
Module 4	maker-pcu_contig_275-snap-gene-0.7-mRNA-1	Conserved gene of unknown function	NA
Module 4	maker-pcu_contig_275-snap-gene-0.9-mRNA-1	AFL165Wp	NA
Module 4	maker-pcu_contig_276-snap-gene-0.11-mRNA-1	Transmembrane protein	NA
Module 4	maker-pcu_contig_276-snap-gene-0.8-mRNA-1	NAD-dependent glycerol-3-phosphate dehydrogenase	NA
Module 4	maker-pcu_contig_276-snap-gene-0.9-mRNA-1	RPA-interacting protein A	NA
Module 4	maker-pcu_contig_27633-snap-gene-0.0-mRNA-1	Beta-glucan synthesis-associated protein	NA
Module 4	maker-pcu_contig_2777-snap-gene-0.2-mRNA-1	Transcriptional activator	NA
Module 4	maker-pcu_contig_2777-snap-gene-0.3-mRNA-1	SPX and EXS domain-containing protein 1	NA
Module 4	maker-pcu_contig_278-snap-gene-0.14-mRNA-1	Protein of unknown function DUF3508	NA
Module 4	maker-pcu_contig_278-snap-gene-0.8-mRNA-1	Conserved gene of unknown function	NA
Module 4	maker-pcu_contig_28-fgenesh-gene-0.8-mRNA-1	Conserved gene of unknown function	NA
Module 4	maker-pcu_contig_28-snap-gene-0.17-mRNA-1	Conserved gene of unknown function	NA
Module 4	maker-pcu_contig_28-snap-gene-0.18-mRNA-1	Plant-specific domain TIGR01589 family protein	NA
Module 4	maker-pcu_contig_28-snap-gene-0.21-mRNA-1	Bardet-Biedl syndrome 1 family protein	NA
Module 4	maker-pcu_contig_280-snap-gene-0.8-mRNA-1	Tetratricopeptide repeat family protein	NA
Module 4	maker-pcu_contig_2807-snap-gene-0.4-mRNA-1	ATP-binding Cassette (ABC) Superfamily	NA
Module 4	maker-pcu_contig_28099-snap-gene-0.1-mRNA-1	Calcium-activated potassium channel subunit alpha-1	NA
Module 4	maker-pcu_contig_281-snap-gene-0.12-mRNA-1	Deoxycytidylate deaminase	NA
Module 4	maker-pcu_contig_281-snap-gene-0.7-mRNA-1	Conserved gene of unknown function	NA
Module 4	maker-pcu_contig_2813-snap-gene-0.2-mRNA-1	Conserved gene of unknown function	NA
Module 4	maker-pcu_contig_28146-snap-gene-0.1-mRNA-1	Conserved edge expressed protein	NA
Module 4	maker-pcu_contig_282-snap-gene-0.11-mRNA-1	Conserved gene of unknown function	NA
Module 4	maker-pcu_contig_2824-snap-gene-0.3-mRNA-1	Splicing factor, suppressor of white apricot	NA
Module 4	maker-pcu_contig_2824-snap-gene-0.4-mRNA-1	Nucleic acid binding protein	NA
Module 4	maker-pcu_contig_283-snap-gene-0.7-mRNA-1	Flagellar/basal body protein	NA
Module 4	maker-pcu_contig_2833-snap-gene-0.1-mRNA-1	Conserved gene of unknown function	NA
Module 4	maker-pcu_contig_2836-snap-gene-0.2-mRNA-1	Cell division protein ftsZ	NA
Module 4	maker-pcu_contig_28469-snap-gene-0.0-mRNA-1	Secreted RxLR effector peptide protein	NA
Module 4	maker-pcu_contig_28494-snap-gene-0.0-mRNA-1	Gene of unknown function	NA
Module 4	maker-pcu_contig_28500-snap-gene-0.0-mRNA-1	Gene of unknown function	NA
Module 4	maker-pcu_contig_2857-snap-gene-0.2-mRNA-1	Conserved gene of unknown function	NA
Module 4	maker-pcu_contig_2861-snap-gene-0.1-mRNA-1	Conserved gene of unknown function	NA
Module 4	maker-pcu_contig_2864-snap-gene-0.3-mRNA-1	Inositol hexakisphosphate and diphosphoinositol-pentakisphosphate kinase	NA
Module 4	maker-pcu_contig_28677-snap-gene-0.0-mRNA-1	Uncharacterized family protein (UPF0089)	NA
Module 4	maker-pcu_contig_289-snap-gene-0.7-mRNA-1	GTPase	NA
Module 4	maker-pcu_contig_2893-snap-gene-0.1-mRNA-1	Protein kinase	NA
Module 4	maker-pcu_contig_2893-snap-gene-0.2-mRNA-1	SUMO ligase	PF02037(DNA-binding SAP)
Module 4	maker-pcu_contig_29-snap-gene-0.14-mRNA-1	Ribonucleases P/MRP protein subunit POP1 (hPOP1) isoform 2	NA
Module 4	maker-pcu_contig_29-snap-gene-0.16-mRNA-1	Eukaryotic translation initiation factor 4 gamma 2	NA
Module 4	maker-pcu_contig_29-snap-gene-0.19-mRNA-1	Conserved gene of unknown function	NA
Module 4	maker-pcu_contig_29-snap-gene-0.20-mRNA-1	Liver stage antigen	NA
Module 4	maker-pcu_contig_2903-snap-gene-0.3-mRNA-1	Major Facilitator Superfamily (MFS)	NA
Module 4	maker-pcu_contig_29077-snap-gene-0.0-mRNA-1	Secreted RxLR effector peptide protein	NA
Module 4	maker-pcu_contig_29083-fgenesh-gene-0.0-mRNA-1	Gene of unknown function	NA
Module 4	maker-pcu_contig_292-snap-gene-0.5-mRNA-1	Conserved gene of unknown function	NA
Module 4	maker-pcu_contig_293-snap-gene-0.4-mRNA-1	Conserved gene of unknown function	NA
Module 4	maker-pcu_contig_293-snap-gene-0.5-mRNA-1	Checkpoint clamp complex protein Hus1	NA
Module 4	maker-pcu_contig_2932-snap-gene-0.4-mRNA-1	Ubiquitin	NA
Module 4	maker-pcu_contig_295-snap-gene-0.9-mRNA-1	Conserved hypothetical protein	NA
Module 4	maker-pcu_contig_2993-snap-gene-0.1-mRNA-1	Leucine-rich repeat	NA
Module 4	maker-pcu_contig_2997-snap-gene-0.0-mRNA-1	Centrin 4	NA
Module 4	maker-pcu_contig_29971-snap-gene-0.0-mRNA-1	Gene of unknown function	NA
Module 4	maker-pcu_contig_3-fgenesh-gene-0.3-mRNA-1	Mitochondrial inner membrane protease ATP23	NA
Module 4	maker-pcu_contig_30-snap-gene-0.18-mRNA-1	ER-derived vesicles protein ERV14	NA
Module 4	maker-pcu_contig_30-snap-gene-0.27-mRNA-1	Snurportin	NA
Module 4	maker-pcu_contig_300-fgenesh-gene-0.1-mRNA-1	LYR motif-containing protein 5	NA
Module 4	maker-pcu_contig_300-snap-gene-0.7-mRNA-1	Conserved gene of unknown function	NA
Module 4	maker-pcu_contig_30042-snap-gene-0.0-mRNA-1	UXT	NA
Module 4	maker-pcu_contig_30150-snap-gene-0.0-mRNA-1	Conserved gene of unknown function	NA
Module 4	maker-pcu_contig_3020-snap-gene-0.2-mRNA-1	Prenyltransferase	NA
Module 4	maker-pcu_contig_3022-snap-gene-0.2-mRNA-1	Multi sex combs CG12058-PA	NA
Module 4	maker-pcu_contig_3026-snap-gene-0.1-mRNA-1	DNA polymerase epsilon subunit	NA
Module 4	maker-pcu_contig_303-snap-gene-0.8-mRNA-1	Metal-dependent hydrolase (Beta-lactamase superfamily)	NA
Module 4	maker-pcu_contig_3036-snap-gene-0.1-mRNA-1	TRNA uridine 5-carboxymethylaminomethyl modification enzyme gidA	NA
Module 4	maker-pcu_contig_30556-snap-gene-0.0-mRNA-1	Gene of unknown function	NA
Module 4	maker-pcu_contig_3059-snap-gene-0.1-mRNA-1	Nuclear excision repair protein Rad23	NA
Module 4	maker-pcu_contig_3095-snap-gene-0.2-mRNA-1	FHA domain protein	NA
Module 4	maker-pcu_contig_31-snap-gene-0.13-mRNA-1	Conserved gene of unknown function	NA
Module 4	maker-pcu_contig_31-snap-gene-0.19-mRNA-1	Conserved gene of unknown function	NA
Module 4	maker-pcu_contig_3102-snap-gene-0.3-mRNA-1	Myb-like DNA-binding protein	PF00249(Myb, DNA-binding)
Module 4	maker-pcu_contig_3108-snap-gene-0.0-mRNA-1	Conserved gene of unknown function	NA
Module 4	maker-pcu_contig_312-snap-gene-0.3-mRNA-1	Notchless family protein	NA
Module 4	maker-pcu_contig_31318-snap-gene-0.0-mRNA-1	Glycoside hydrolase	NA
Module 4	maker-pcu_contig_3140-snap-gene-0.3-mRNA-1	RRNA-processing protein EFG1	NA
Module 4	maker-pcu_contig_31472-snap-gene-0.0-mRNA-1	Glycoside hydrolase	NA
Module 4	maker-pcu_contig_315-snap-gene-0.18-mRNA-1	DUF726 domain protein	NA
Module 4	maker-pcu_contig_315-snap-gene-0.19-mRNA-1	Sperm-associated antigen 1	NA
Module 4	maker-pcu_contig_3157-snap-gene-0.2-mRNA-1	Peroxisome assembly protein	NA
Module 4	maker-pcu_contig_316-snap-gene-0.6-mRNA-1	Caffeate O-Methyltransferase	NA
Module 4	maker-pcu_contig_318-snap-gene-0.10-mRNA-1	COX19 homolog, cytochrome c oxidase assembly protein	NA
Module 4	maker-pcu_contig_318-snap-gene-0.19-mRNA-1	Acetyltransferases	NA
Module 4	maker-pcu_contig_319-snap-gene-0.5-mRNA-1	Trimethyllysine dioxygenase	NA
Module 4	maker-pcu_contig_319-snap-gene-0.8-mRNA-1	Dolichyl-diphosphooligosaccharide-protein glycosyltransferase subunit	NA
Module 4	maker-pcu_contig_32-fgenesh-gene-0.2-mRNA-1	Conserved gene of unknown function	NA
Module 4	maker-pcu_contig_32-snap-gene-0.19-mRNA-1	Ribosomal protein S17	NA
Module 4	maker-pcu_contig_32-snap-gene-0.23-mRNA-1	Conserved gene of unknown function	NA
Module 4	maker-pcu_contig_32-snap-gene-0.24-mRNA-1	Mitochondrial inner membrane protease subunit 1	NA
Module 4	maker-pcu_contig_32-snap-gene-0.32-mRNA-1	Conserved gene of unknown function	NA
Module 4	maker-pcu_contig_32-snap-gene-0.33-mRNA-1	Tubulin-specific chaperone B	NA
Module 4	maker-pcu_contig_32-snap-gene-0.44-mRNA-1	Serine/threonine protein kinase	NA
Module 4	maker-pcu_contig_32-snap-gene-0.47-mRNA-1	Gene of unknown function	NA
Module 4	maker-pcu_contig_3203-snap-gene-0.3-mRNA-1	Sugar fermentation stimulation protein	NA
Module 4	maker-pcu_contig_321-snap-gene-0.12-mRNA-1	Conserved gene of unknown function	NA
Module 4	maker-pcu_contig_321-snap-gene-0.5-mRNA-1	Palmitoyltransferase	NA
Module 4	maker-pcu_contig_321-snap-gene-0.8-mRNA-1	Conserved gene of unknown function	NA
Module 4	maker-pcu_contig_322-snap-gene-0.14-mRNA-1	Tyrosine phosphatase family protein	NA
Module 4	maker-pcu_contig_322-snap-gene-0.6-mRNA-1	Conserved gene of unknown function	NA
Module 4	maker-pcu_contig_322-snap-gene-0.7-mRNA-1	Ran-binding protein (RanBP10)	NA
Module 4	maker-pcu_contig_3220-snap-gene-0.1-mRNA-1	Conserved hypothetical protein	NA
Module 4	maker-pcu_contig_323-fgenesh-gene-0.8-mRNA-1	Small nuclear ribonucleoprotein-associated protein D3	NA
Module 4	maker-pcu_contig_323-snap-gene-0.23-mRNA-1	Dolichyl-phosphate mannosyltransferase 2 regulatory subunit	NA
Module 4	maker-pcu_contig_3247-snap-gene-0.1-mRNA-1	Conserved gene of unknown function	NA
Module 4	maker-pcu_contig_3257-snap-gene-0.2-mRNA-1	Intraflagellar Transport protein 80	NA
Module 4	maker-pcu_contig_326-snap-gene-0.12-mRNA-1	Conserved gene of unknown function	NA
Module 4	maker-pcu_contig_327-snap-gene-0.3-mRNA-1	Conserved gene of unknown function	NA
Module 4	maker-pcu_contig_327-snap-gene-0.4-mRNA-1	Conserved gene of unknown function	NA
Module 4	maker-pcu_contig_327-snap-gene-0.6-mRNA-1	Flagellar associated protein putative: flagellar associated protein	NA
Module 4	maker-pcu_contig_3275-fgenesh-gene-0.1-mRNA-1	Conserved gene of unknown function	NA
Module 4	maker-pcu_contig_328-fgenesh-gene-0.1-mRNA-1	Conserved gene of unknown function	NA
Module 4	maker-pcu_contig_328-snap-gene-0.4-mRNA-1	Ligatin	NA
Module 4	maker-pcu_contig_3283-fgenesh-gene-0.0-mRNA-1	Conserved gene of unknown function	NA
Module 4	maker-pcu_contig_3283-snap-gene-0.3-mRNA-1	LSM Sm family member	NA
Module 4	maker-pcu_contig_3290-snap-gene-0.1-mRNA-1	Folate-sensitive fragile site protein Fra10Ac1	NA
Module 4	maker-pcu_contig_3315-snap-gene-0.1-mRNA-1	Gene of unknown function	NA
Module 4	maker-pcu_contig_3319-snap-gene-0.1-mRNA-1	Conserved gene of unknown function	NA
Module 4	maker-pcu_contig_33193-snap-gene-0.0-mRNA-1	Conserved gene of unknown function	NA
Module 4	maker-pcu_contig_332-fgenesh-gene-0.2-mRNA-1	Potential mitochondrial protein Fmp16	NA
Module 4	maker-pcu_contig_333-snap-gene-0.6-mRNA-1	LOC446918 protein (ISS)	NA
Module 4	maker-pcu_contig_33303-snap-gene-0.0-mRNA-1	Conserved gene of unknown function	NA
Module 4	maker-pcu_contig_335-snap-gene-0.5-mRNA-1	Conserved gene of unknown function	NA
Module 4	maker-pcu_contig_335-snap-gene-0.9-mRNA-1	Splicing factor 3B subunit 4	NA
Module 4	maker-pcu_contig_33531-snap-gene-0.0-mRNA-1	Gene of unknown function	NA
Module 4	maker-pcu_contig_33620-snap-gene-0.1-mRNA-1	Conserved gene of unknown function	NA
Module 4	maker-pcu_contig_3367-snap-gene-0.1-mRNA-1	Ankyrin	NA
Module 4	maker-pcu_contig_3378-fgenesh-gene-0.1-mRNA-1	Conserved gene of unknown function	NA
Module 4	maker-pcu_contig_3378-snap-gene-0.6-mRNA-1	Conserved gene of unknown function	NA
Module 4	maker-pcu_contig_338-snap-gene-0.8-mRNA-1	Anaphase-promoting complex subunit 7	NA
Module 4	maker-pcu_contig_3381-snap-gene-0.3-mRNA-1	Conserved gene of unknown function	NA
Module 4	maker-pcu_contig_3397-snap-gene-0.2-mRNA-1	Inositol-pentakisphosphate 2-kinase	NA
Module 4	maker-pcu_contig_340-snap-gene-0.9-mRNA-1	26S proteosome regulatory subunit	NA
Module 4	maker-pcu_contig_3410-snap-gene-0.1-mRNA-1	Splicing factor 3B subunit 5/RDS3 complex subunit 10	NA
Module 4	maker-pcu_contig_342-snap-gene-0.10-mRNA-1	YEATS family protein	NA
Module 4	maker-pcu_contig_342-snap-gene-0.8-mRNA-1	Non muscle myosin	NA
Module 4	maker-pcu_contig_342-snap-gene-0.9-mRNA-1	Conserved gene of unknown function	NA
Module 4	maker-pcu_contig_343-snap-gene-0.2-mRNA-1	Conserved gene of unknown function	NA
Module 4	maker-pcu_contig_343-snap-gene-0.3-mRNA-1	Cell cycle control protein (Cwf19)	NA
Module 4	maker-pcu_contig_344-snap-gene-0.4-mRNA-1	TRNA isopentenyltransferase	NA
Module 4	maker-pcu_contig_344-snap-gene-0.7-mRNA-1	ATPase, AAA-5	NA
Module 4	maker-pcu_contig_3440-snap-gene-0.2-mRNA-1	Annexin (Annexin) Family	NA
Module 4	maker-pcu_contig_34436-snap-gene-0.0-mRNA-1	GAF domain-containing protein	NA
Module 4	maker-pcu_contig_345-snap-gene-0.8-mRNA-1	Proteasomal ubiquitin receptor ADRM1	NA
Module 4	maker-pcu_contig_3465-snap-gene-0.0-mRNA-1	Myb-like DNA-binding protein	PF00249(Myb, DNA-binding)
Module 4	maker-pcu_contig_35-snap-gene-0.29-mRNA-1	Conserved gene of unknown function	NA
Module 4	maker-pcu_contig_350-snap-gene-0.3-mRNA-1	Haustorium-specific membrane protein	NA
Module 4	maker-pcu_contig_350-snap-gene-0.4-mRNA-1	Guanidinoacetate N-methyltransferase	NA
Module 4	maker-pcu_contig_3502-snap-gene-0.2-mRNA-1	Thyroid hormone receptor interactor 11	NA
Module 4	maker-pcu_contig_35086-snap-gene-0.0-mRNA-1	Conserved gene of unknown function	NA
Module 4	maker-pcu_contig_351-snap-gene-0.11-mRNA-1	Conserved gene of unknown function	NA
Module 4	maker-pcu_contig_351-snap-gene-0.5-mRNA-1	Steroid 5 alpha-reductase 2	NA
Module 4	maker-pcu_contig_351-snap-gene-0.6-mRNA-1	Conserved gene of unknown function	NA
Module 4	maker-pcu_contig_351-snap-gene-0.9-mRNA-1	Protein BUD31 homolog	NA
Module 4	maker-pcu_contig_35172-fgenesh-gene-0.0-mRNA-1	AP-1 complex subunit beta	NA
Module 4	maker-pcu_contig_352-fgenesh-gene-0.2-mRNA-1	Conserved gene of unknown function	NA
Module 4	maker-pcu_contig_352-snap-gene-0.10-mRNA-1	Novel protein	NA
Module 4	maker-pcu_contig_352-snap-gene-0.5-mRNA-1	Conserved gene of unknown function	NA
Module 4	maker-pcu_contig_353-snap-gene-0.7-mRNA-1	Conserved gene of unknown function	NA
Module 4	maker-pcu_contig_35453-snap-gene-0.0-mRNA-1	Necrosis and ethylene-inducing protein 3	NA
Module 4	maker-pcu_contig_355-snap-gene-0.7-mRNA-1	Pre-mRNA polyadenylation factor	NA
Module 4	maker-pcu_contig_3553-snap-gene-0.1-mRNA-1	Acyltransferase	NA
Module 4	maker-pcu_contig_357-snap-gene-0.5-mRNA-1	Protein phosphatase 1 regulatory subunit	NA
Module 4	maker-pcu_contig_359-snap-gene-0.8-mRNA-1	TRNA-specific adenosine deaminase	NA
Module 4	maker-pcu_contig_359-snap-gene-0.9-mRNA-1	C33H5.19 isoform 1	NA
Module 4	maker-pcu_contig_36-snap-gene-0.11-mRNA-1	Peptidyl-prolyl cis-trans isomerase	NA
Module 4	maker-pcu_contig_362-snap-gene-0.10-mRNA-1	Conserved gene of unknown function	NA
Module 4	maker-pcu_contig_362-snap-gene-0.3-mRNA-1	Myb-like DNA-binding protein	PF00249(Myb, DNA-binding)
Module 4	maker-pcu_contig_362-snap-gene-0.4-mRNA-1	Conserved gene of unknown function	NA
Module 4	maker-pcu_contig_3621-snap-gene-0.0-mRNA-1	Transmembrane protein	NA
Module 4	maker-pcu_contig_3628-snap-gene-0.2-mRNA-1	Conserved gene of unknown function	NA
Module 4	maker-pcu_contig_363-snap-gene-0.6-mRNA-1	LSM domain containing 1	NA
Module 4	maker-pcu_contig_36415-snap-gene-0.0-mRNA-1	Gene of unknown function	NA
Module 4	maker-pcu_contig_365-snap-gene-0.8-mRNA-1	Conserved gene of unknown function	NA
Module 4	maker-pcu_contig_365-snap-gene-0.9-mRNA-1	Calcineurin-like phosphoesterase	NA
Module 4	maker-pcu_contig_366-snap-gene-0.6-mRNA-1	Amino Acid/Auxin Permease (AAAP) Family	NA
Module 4	maker-pcu_contig_3661-snap-gene-0.0-mRNA-1	Dual specificity phosphatase	NA
Module 4	maker-pcu_contig_3675-snap-gene-0.1-mRNA-1	Nitroreductase	NA
Module 4	maker-pcu_contig_368-snap-gene-0.4-mRNA-1	Patatin	NA
Module 4	maker-pcu_contig_3681-snap-gene-0.2-mRNA-1	Phosphatidylinositol synthase (PIS)	NA
Module 4	maker-pcu_contig_3681-snap-gene-0.3-mRNA-1	Conserved gene of unknown function	NA
Module 4	maker-pcu_contig_37-snap-gene-0.19-mRNA-1	Di-N-acetylchitobiase	NA
Module 4	maker-pcu_contig_37-snap-gene-0.29-mRNA-1	Isoform 3 of UPF0470 protein	NA
Module 4	maker-pcu_contig_37023-snap-gene-0.0-mRNA-1	Betaine aldehyde dehydrogenase	NA
Module 4	maker-pcu_contig_371-snap-gene-0.13-mRNA-1	SH3 domain-containing protein PJ696.02	NA
Module 4	maker-pcu_contig_3722-snap-gene-0.1-mRNA-1	Lysosomal Cystine Transporter (LCT) Family	NA
Module 4	maker-pcu_contig_3726-snap-gene-0.2-mRNA-1	Conserved gene of unknown function	NA
Module 4	maker-pcu_contig_373-snap-gene-0.15-mRNA-1	DnaJ domain protein	NA
Module 4	maker-pcu_contig_3759-snap-gene-0.3-mRNA-1	Vesicle-associated membrane protein-associated protein A	NA
Module 4	maker-pcu_contig_3781-fgenesh-gene-0.0-mRNA-1	Conserved gene of unknown function	NA
Module 4	maker-pcu_contig_3793-snap-gene-0.2-mRNA-1	Trafficking protein particle complex subunit 6B	NA
Module 4	maker-pcu_contig_3799-snap-gene-0.1-mRNA-1	Transcription factor	PF00249(Myb, DNA-binding)
Module 4	maker-pcu_contig_38-snap-gene-0.7-mRNA-1	Conserved gene of unknown function	NA
Module 4	maker-pcu_contig_382-snap-gene-0.10-mRNA-1	Conserved gene of unknown function	NA
Module 4	maker-pcu_contig_382-snap-gene-0.8-mRNA-1	Calcineurin subunit B	NA
Module 4	maker-pcu_contig_3828-snap-gene-0.4-mRNA-1	Vacuolar sorting protein 9 domain-containing protein	NA
Module 4	maker-pcu_contig_385-snap-gene-0.0-mRNA-1	Conserved gene of unknown function	NA
Module 4	maker-pcu_contig_3850-fgenesh-gene-0.0-mRNA-1	Inositol polyphosphate multikinase	NA
Module 4	maker-pcu_contig_386-snap-gene-0.8-mRNA-1	Trafficking protein particle complex subunit	NA
Module 4	maker-pcu_contig_38625-fgenesh-gene-0.0-mRNA-1	Ubiquitin-conjugating enzyme E2	NA
Module 4	maker-pcu_contig_388-fgenesh-gene-0.3-mRNA-1	Gene of unknown function	NA
Module 4	maker-pcu_contig_39-snap-gene-0.11-mRNA-1	Poly(A) RNA polymerase	NA
Module 4	maker-pcu_contig_390-snap-gene-0.4-mRNA-1	RPS6 protein kinase	NA
Module 4	maker-pcu_contig_3901-snap-gene-0.2-mRNA-1	Receptor accessory protein 4	NA
Module 4	maker-pcu_contig_391-snap-gene-0.5-mRNA-1	Conserved gene of unknown function	NA
Module 4	maker-pcu_contig_3919-snap-gene-0.1-mRNA-1	Ubiquitin carboxyl-terminal hydrolase	NA
Module 4	maker-pcu_contig_392-fgenesh-gene-0.4-mRNA-1	Conserved gene of unknown function	NA
Module 4	maker-pcu_contig_393-snap-gene-0.7-mRNA-1	Outer Dynein Arm Docking Complex	NA
Module 4	maker-pcu_contig_394-snap-gene-0.7-mRNA-1	Conserved gene of unknown function	NA
Module 4	maker-pcu_contig_395-snap-gene-0.11-mRNA-1	Palmitoyltransferase	NA
Module 4	maker-pcu_contig_3960-snap-gene-0.4-mRNA-1	Serine/threonine protein kinase	NA
Module 4	maker-pcu_contig_3962-snap-gene-0.4-mRNA-1	Gene of unknown function	NA
Module 4	maker-pcu_contig_3984-snap-gene-0.1-mRNA-1	Conserved gene of unknown function	NA
Module 4	maker-pcu_contig_399-snap-gene-0.6-mRNA-1	RRNA methylase	NA
Module 4	maker-pcu_contig_4-snap-gene-0.22-mRNA-1	Conserved gene of unknown function	NA
Module 4	maker-pcu_contig_40-snap-gene-0.15-mRNA-1	TBC domain-containing protein	NA
Module 4	maker-pcu_contig_40-snap-gene-0.26-mRNA-1	Conserved gene of unknown function	NA
Module 4	maker-pcu_contig_40-snap-gene-0.28-mRNA-1	Conserved gene of unknown function	NA
Module 4	maker-pcu_contig_400-snap-gene-0.12-mRNA-1	Chromosome 18 contig 1, DNA sequence	NA
Module 4	maker-pcu_contig_400-snap-gene-0.9-mRNA-1	Nudix hydrolase 3	NA
Module 4	maker-pcu_contig_4055-fgenesh-gene-0.0-mRNA-1	Conserved gene of unknown function	NA
Module 4	maker-pcu_contig_4057-snap-gene-0.2-mRNA-1	Conserved gene of unknown function	NA
Module 4	maker-pcu_contig_4061-snap-gene-0.2-mRNA-1	6 snRNA-associated Sm	NA
Module 4	maker-pcu_contig_4068-snap-gene-0.0-mRNA-1	Gene of unknown function	NA
Module 4	maker-pcu_contig_407-fgenesh-gene-0.5-mRNA-1	FOG: RRM domain (ISS)	NA
Module 4	maker-pcu_contig_407-snap-gene-0.6-mRNA-1	MADS-box transcription factor	PF00319(Transcription factor, MADS-box)
Module 4	maker-pcu_contig_407-snap-gene-0.7-mRNA-1	Conserved gene of unknown function	PF00010(Helix-loop-helix DNA-binding domain)
Module 4	maker-pcu_contig_4072-snap-gene-0.0-mRNA-1	Amino Acid/Auxin Permease (AAAP) Family	NA
Module 4	maker-pcu_contig_4086-snap-gene-0.1-mRNA-1	Thioredoxin	NA
Module 4	maker-pcu_contig_41-snap-gene-0.11-mRNA-1	Tripeptidyl-peptidase	NA
Module 4	maker-pcu_contig_4107-snap-gene-0.0-mRNA-1	Glycosyl transferase, group 1 family protein	NA
Module 4	maker-pcu_contig_4133-fgenesh-gene-0.0-mRNA-1	Conserved gene of unknown function	NA
Module 4	maker-pcu_contig_4133-snap-gene-0.3-mRNA-1	Augmenter of liver regeneration	NA
Module 4	maker-pcu_contig_414-fgenesh-gene-0.4-mRNA-1	Protein farnesyltransferase/geranylgeranyltransferase	NA
Module 4	maker-pcu_contig_4166-snap-gene-0.1-mRNA-1	Gene of unknown function	NA
Module 4	maker-pcu_contig_4166-snap-gene-0.2-mRNA-1	Vacuolar protein sorting-associated protein	NA
Module 4	maker-pcu_contig_418-snap-gene-0.3-mRNA-1	MRNA cap guanine-N7 methyltransferase	NA
Module 4	maker-pcu_contig_418-snap-gene-0.7-mRNA-1	Helicase-associated	NA
Module 4	maker-pcu_contig_4188-snap-gene-0.2-mRNA-1	Conserved gene of unknown function	NA
Module 4	maker-pcu_contig_4214-fgenesh-gene-0.1-mRNA-1	Histidine acid phosphatase	NA
Module 4	maker-pcu_contig_4232-snap-gene-0.1-mRNA-1	Competence protein ComEA helix-hairpin-helix repeat protein	NA
Module 4	maker-pcu_contig_4232-snap-gene-0.2-mRNA-1	Conserved gene of unknown function	NA
Module 4	maker-pcu_contig_424-snap-gene-0.3-mRNA-1	WD repeat protein 35	NA
Module 4	maker-pcu_contig_4254-fgenesh-gene-0.0-mRNA-1	Transcription factor	PF00249(Myb, DNA-binding)
Module 4	maker-pcu_contig_426-snap-gene-0.5-mRNA-1	RING finger protein	NA
Module 4	maker-pcu_contig_426-snap-gene-0.9-mRNA-1	Zinc finger, MYND domain-containing 10	NA
Module 4	maker-pcu_contig_4271-snap-gene-0.1-mRNA-1	TRNA-dihydrouridine synthase	NA
Module 4	maker-pcu_contig_428-snap-gene-0.8-mRNA-1	ADP-ribosylation factor GTPase-activating protein	NA
Module 4	maker-pcu_contig_43-snap-gene-0.4-mRNA-1	Transcription factor	PF00249(Myb, DNA-binding)
Module 4	maker-pcu_contig_4306-snap-gene-0.1-mRNA-1	Phospholipase D, Pi-sPLD-like-6	NA
Module 4	maker-pcu_contig_431-snap-gene-0.14-mRNA-1	DNA repair protein	NA
Module 4	maker-pcu_contig_4311-snap-gene-0.1-mRNA-1	RapGAP/RanGAP domain-containing protein	NA
Module 4	maker-pcu_contig_4313-snap-gene-0.1-mRNA-1	Conserved gene of unknown function	NA
Module 4	maker-pcu_contig_432-snap-gene-0.7-mRNA-1	CDS Pa_3_2140	NA
Module 4	maker-pcu_contig_4321-fgenesh-gene-0.0-mRNA-1	Conserved gene of unknown function	NA
Module 4	maker-pcu_contig_4322-snap-gene-0.3-mRNA-1	Conserved gene of unknown function	NA
Module 4	maker-pcu_contig_433-snap-gene-0.6-mRNA-1	Mitochondrial Carrier (MC) Family	NA
Module 4	maker-pcu_contig_433-snap-gene-0.8-mRNA-1	Nudix hydrolase 24, chloroplastic	NA
Module 4	maker-pcu_contig_4331-snap-gene-0.0-mRNA-1	Spore coat protein CotH	NA
Module 4	maker-pcu_contig_4347-fgenesh-gene-0.0-mRNA-1	Conserved gene of unknown function	NA
Module 4	maker-pcu_contig_435-fgenesh-gene-0.3-mRNA-1	Major facilitator superfamily (ISS)	NA
Module 4	maker-pcu_contig_436-fgenesh-gene-0.1-mRNA-1	Nucleolar protein 16	NA
Module 4	maker-pcu_contig_436-snap-gene-0.14-mRNA-1	Conserved gene of unknown function	NA
Module 4	maker-pcu_contig_436-snap-gene-0.7-mRNA-1	Peroxisome assembly protein 12	NA
Module 4	maker-pcu_contig_4376-snap-gene-0.2-mRNA-1	Tartrate-resistant acid phosphatase type 5	NA
Module 4	maker-pcu_contig_4381-fgenesh-gene-0.1-mRNA-1	Conserved gene of unknown function	NA
Module 4	maker-pcu_contig_4381-snap-gene-0.2-mRNA-1	Conserved gene of unknown function	NA
Module 4	maker-pcu_contig_439-snap-gene-0.6-mRNA-1	DNA cross-link repair protein	NA
Module 4	maker-pcu_contig_439-snap-gene-0.9-mRNA-1	2-oxoglutarate dehydrogenase	NA
Module 4	maker-pcu_contig_4407-snap-gene-0.1-mRNA-1	GDI interacting protein 3, isoform B	NA
Module 4	maker-pcu_contig_4426-snap-gene-0.1-mRNA-1	Gene of unknown function	NA
Module 4	maker-pcu_contig_4457-snap-gene-0.1-mRNA-1	Conserved gene of unknown function	NA
Module 4	maker-pcu_contig_4457-snap-gene-0.2-mRNA-1	Conserved gene of unknown function	NA
Module 4	maker-pcu_contig_446-snap-gene-0.7-mRNA-1	Activating signal cointegrator 1 complex subunit 2	NA
Module 4	maker-pcu_contig_447-snap-gene-0.1-mRNA-1	Pseudouridine synthase, RluA family	NA
Module 4	maker-pcu_contig_447-snap-gene-0.7-mRNA-1	FtsJ methyltransferase domain-containing protein	NA
Module 4	maker-pcu_contig_447-snap-gene-0.8-mRNA-1	FtsJ methyltransferase domain-containing protein	NA
Module 4	maker-pcu_contig_448-snap-gene-0.13-mRNA-1	Conserved gene of unknown function	NA
Module 4	maker-pcu_contig_4506-snap-gene-0.2-mRNA-1	Conserved gene of unknown function	NA
Module 4	maker-pcu_contig_451-snap-gene-0.10-mRNA-1	CG5013	NA
Module 4	maker-pcu_contig_453-snap-gene-0.14-mRNA-1	Phosphatidylinositol glycan, class P (Predicted), isoform CRA_a	NA
Module 4	maker-pcu_contig_453-snap-gene-0.18-mRNA-1	Intraflagellar Transport Protein 52	NA
Module 4	maker-pcu_contig_4543-snap-gene-0.2-mRNA-1	Conserved gene of unknown function	NA
Module 4	maker-pcu_contig_4543-snap-gene-0.3-mRNA-1	Conserved gene of unknown function	NA
Module 4	maker-pcu_contig_4543-snap-gene-0.4-mRNA-1	Gene of unknown function	NA
Module 4	maker-pcu_contig_456-snap-gene-0.6-mRNA-1	Membrane protein	NA
Module 4	maker-pcu_contig_457-snap-gene-0.7-mRNA-1	Conserved gene of unknown function	NA
Module 4	maker-pcu_contig_4576-fgenesh-gene-0.0-mRNA-1	Conserved gene of unknown function	NA
Module 4	maker-pcu_contig_458-snap-gene-0.4-mRNA-1	Conserved gene of unknown function	NA
Module 4	maker-pcu_contig_46-snap-gene-0.11-mRNA-1	MYB transcription factor	PF00249(Myb, DNA-binding)
Module 4	maker-pcu_contig_463-snap-gene-0.7-mRNA-1	BBOX Zn finger domain containing protein	NA
Module 4	maker-pcu_contig_4642-snap-gene-0.0-mRNA-1	Conserved gene of unknown function	NA
Module 4	maker-pcu_contig_465-snap-gene-0.5-mRNA-1	DNA topoisomerase	NA
Module 4	maker-pcu_contig_467-snap-gene-0.3-mRNA-1	Human chromosome 9 open reading frame 97 (C9orf97)	NA
Module 4	maker-pcu_contig_468-snap-gene-0.14-mRNA-1	NADH-ubiquinone oxidoreductase	NA
Module 4	maker-pcu_contig_4687-snap-gene-0.2-mRNA-1	Vesicle transport v-SNARE; t-snare	NA
Module 4	maker-pcu_contig_4696-snap-gene-0.0-mRNA-1	Gene of unknown function	NA
Module 4	maker-pcu_contig_47-snap-gene-0.14-mRNA-1	Conserved gene of unknown function	NA
Module 4	maker-pcu_contig_47-snap-gene-0.18-mRNA-1	Chromosome 04 contig 1, DNA sequence	NA
Module 4	maker-pcu_contig_47-snap-gene-0.20-mRNA-1	Conserved gene of unknown function	NA
Module 4	maker-pcu_contig_47-snap-gene-0.21-mRNA-1	Cytochrome b5 reductase with F-box domain	NA
Module 4	maker-pcu_contig_47-snap-gene-0.23-mRNA-1	Survival of motor neuron protein interacting protein 1	NA
Module 4	maker-pcu_contig_470-snap-gene-0.8-mRNA-1	Pc20g05770 protein	NA
Module 4	maker-pcu_contig_4701-snap-gene-0.1-mRNA-1	Conserved gene of unknown function	NA
Module 4	maker-pcu_contig_4738-snap-gene-0.3-mRNA-1	Conserved gene of unknown function	NA
Module 4	maker-pcu_contig_475-snap-gene-0.5-mRNA-1	Palmitoyltransferase	NA
Module 4	maker-pcu_contig_476-snap-gene-0.6-mRNA-1	Vacuolar membrane protein	NA
Module 4	maker-pcu_contig_4763-snap-gene-0.1-mRNA-1	GTP-binding protein	NA
Module 4	maker-pcu_contig_478-snap-gene-0.4-mRNA-1	MCO is implicated in celullar iron transport playing also role in the copper resistance	NA
Module 4	maker-pcu_contig_48-fgenesh-gene-0.7-mRNA-1	Conserved gene of unknown function	NA
Module 4	maker-pcu_contig_48-snap-gene-0.20-mRNA-1	Pentatricopeptide repeat-containing protein	NA
Module 4	maker-pcu_contig_48-snap-gene-0.25-mRNA-1	Radial spoke protein 7	NA
Module 4	maker-pcu_contig_481-snap-gene-0.7-mRNA-1	Nucleotidyltransferase	NA
Module 4	maker-pcu_contig_483-snap-gene-0.9-mRNA-1	Mastigoneme	NA
Module 4	maker-pcu_contig_4833-snap-gene-0.2-mRNA-1	DEAD/DEAH box RNA helicase	NA
Module 4	maker-pcu_contig_484-fgenesh-gene-0.0-mRNA-1	Mediator complex subunit 4	NA
Module 4	maker-pcu_contig_484-snap-gene-0.4-mRNA-1	Regulator of G protein signaling	NA
Module 4	maker-pcu_contig_484-snap-gene-0.6-mRNA-1	Protein phosphatase 2C	NA
Module 4	maker-pcu_contig_484-snap-gene-0.9-mRNA-1	Double-stranded DNA-binding family protein	NA
Module 4	maker-pcu_contig_4868-fgenesh-gene-0.0-mRNA-1	Heat shock protein 101	NA
Module 4	maker-pcu_contig_4868-snap-gene-0.1-mRNA-1	Serine-rich protein	NA
Module 4	maker-pcu_contig_4878-snap-gene-0.1-mRNA-1	Conserved gene of unknown function	NA
Module 4	maker-pcu_contig_4899-snap-gene-0.0-mRNA-1	Hydroxycinnamoyl CoA shikimate/quinate hydroxycinnamoyltransferase	NA
Module 4	maker-pcu_contig_491-snap-gene-0.6-mRNA-1	Croquemort-like mating protein M82	NA
Module 4	maker-pcu_contig_4913-snap-gene-0.1-mRNA-1	Gene of unknown function	NA
Module 4	maker-pcu_contig_4913-snap-gene-0.2-mRNA-1	Gene of unknown function	NA
Module 4	maker-pcu_contig_493-snap-gene-0.10-mRNA-1	Enoyl-[acyl-carrier-protein] reductase [NADH]	NA
Module 4	maker-pcu_contig_4937-fgenesh-gene-0.1-mRNA-1	Mitochondrial import inner membrane translocase subunit TIM16 homolog	NA
Module 4	maker-pcu_contig_495-snap-gene-0.11-mRNA-1	Gene of unknown function	NA
Module 4	maker-pcu_contig_498-snap-gene-0.4-mRNA-1	Conserved gene of unknown function	NA
Module 4	maker-pcu_contig_498-snap-gene-0.5-mRNA-1	Conserved gene of unknown function	NA
Module 4	maker-pcu_contig_499-snap-gene-0.4-mRNA-1	Conserved gene of unknown function	NA
Module 4	maker-pcu_contig_499-snap-gene-0.5-mRNA-1	Conserved gene of unknown function	NA
Module 4	maker-pcu_contig_5-snap-gene-0.32-mRNA-1	RUN and FYVE domain-containing 2 isoform 3	NA
Module 4	maker-pcu_contig_5-snap-gene-0.38-mRNA-1	Gamma-butyrobetaine dioxygenase	NA
Module 4	maker-pcu_contig_50-snap-gene-0.12-mRNA-1	Conserved hypothetical protein	NA
Module 4	maker-pcu_contig_50-snap-gene-0.24-mRNA-1	Notch2	NA
Module 4	maker-pcu_contig_50-snap-gene-0.27-mRNA-1	Antigenic protein	NA
Module 4	maker-pcu_contig_50-snap-gene-0.28-mRNA-1	Conserved gene of unknown function	NA
Module 4	maker-pcu_contig_5029-snap-gene-0.0-mRNA-1	Conserved gene of unknown function	NA
Module 4	maker-pcu_contig_5037-snap-gene-0.0-mRNA-1	Conserved gene of unknown function	NA
Module 4	maker-pcu_contig_5057-snap-gene-0.1-mRNA-1	Exocyst complex component	NA
Module 4	maker-pcu_contig_506-snap-gene-0.7-mRNA-1	HRAS-like suppressor	NA
Module 4	maker-pcu_contig_5078-snap-gene-0.0-mRNA-1	Conserved gene of unknown function	NA
Module 4	maker-pcu_contig_51-snap-gene-0.23-mRNA-1	Conserved gene of unknown function	NA
Module 4	maker-pcu_contig_510-snap-gene-0.7-mRNA-1	DTW domain-containing protein	NA
Module 4	maker-pcu_contig_5102-snap-gene-0.0-mRNA-1	Conserved gene of unknown function	NA
Module 4	maker-pcu_contig_512-snap-gene-0.9-mRNA-1	Conserved gene of unknown function	NA
Module 4	maker-pcu_contig_5142-snap-gene-0.1-mRNA-1	Conserved gene of unknown function	NA
Module 4	maker-pcu_contig_515-snap-gene-0.7-mRNA-1	Sphingosine/diacylglycerol kinase-like enzyme	NA
Module 4	maker-pcu_contig_517-snap-gene-0.6-mRNA-1	Protein-L-isoaspartate O-methyltransferase	NA
Module 4	maker-pcu_contig_5197-fgenesh-gene-0.0-mRNA-1	Conserved gene of unknown function	NA
Module 4	maker-pcu_contig_520-snap-gene-0.2-mRNA-1	Histidyl-tRNA synthetase	NA
Module 4	maker-pcu_contig_525-snap-gene-0.10-mRNA-1	Ubiquitin carboxyl-terminal hydrolase	NA
Module 4	maker-pcu_contig_53-snap-gene-0.10-mRNA-1	Peroxisomal biogenesis factor 3	NA
Module 4	maker-pcu_contig_53-snap-gene-0.14-mRNA-1	Nuclear migration protein nudC	NA
Module 4	maker-pcu_contig_531-snap-gene-0.6-mRNA-1	Salicylate hydroxylase	NA
Module 4	maker-pcu_contig_5332-snap-gene-0.0-mRNA-1	FAP221	NA
Module 4	maker-pcu_contig_534-snap-gene-0.5-mRNA-1	Kelch motif family protein	NA
Module 4	maker-pcu_contig_5345-snap-gene-0.0-mRNA-1	Conserved gene of unknown function	NA
Module 4	maker-pcu_contig_5358-snap-gene-0.0-mRNA-1	Disease resistance protein	NA
Module 4	maker-pcu_contig_536-snap-gene-0.7-mRNA-1	SET domain-containing protein	NA
Module 4	maker-pcu_contig_536-snap-gene-0.8-mRNA-1	3-hydroxyisobutyrate dehydrogenase	NA
Module 4	maker-pcu_contig_5418-snap-gene-0.1-mRNA-1	Regulator of microtubule dynamics protein	NA
Module 4	maker-pcu_contig_5428-snap-gene-0.1-mRNA-1	Intraflagellar Transport Protein 122	NA
Module 4	maker-pcu_contig_5433-snap-gene-0.1-mRNA-1	Carbohydrate-binding protein	NA
Module 4	maker-pcu_contig_5453-snap-gene-0.1-mRNA-1	Myosin	NA
Module 4	maker-pcu_contig_5476-snap-gene-0.2-mRNA-1	S-adenosylmethionine-dependent methyltransferase	NA
Module 4	maker-pcu_contig_5481-snap-gene-0.0-mRNA-1	Maltose O-acetyltransferase	NA
Module 4	maker-pcu_contig_5499-snap-gene-0.1-mRNA-1	Transposase, MuDR, plant	NA
Module 4	maker-pcu_contig_55-snap-gene-0.13-mRNA-1	Vacuolar protein sorting-associated protein	NA
Module 4	maker-pcu_contig_550-snap-gene-0.6-mRNA-1	Alpha-1,3-mannosyltransferase	NA
Module 4	maker-pcu_contig_5504-snap-gene-0.1-mRNA-1	DNA-binding protein	NA
Module 4	maker-pcu_contig_5509-snap-gene-0.3-mRNA-1	DnaJ protein	NA
Module 4	maker-pcu_contig_5522-snap-gene-0.1-mRNA-1	Conserved gene of unknown function	NA
Module 4	maker-pcu_contig_5535-snap-gene-0.0-mRNA-1	Phosphatidylinositol-4-phosphate-5-kinase (Pi-PIPKD10)	NA
Module 4	maker-pcu_contig_5559-snap-gene-0.0-mRNA-1	Selenocysteine-specific elongation factor	NA
Module 4	maker-pcu_contig_5599-snap-gene-0.1-mRNA-1	Exportin-5	NA
Module 4	maker-pcu_contig_56-snap-gene-0.10-mRNA-1	RNA polymerase II-associated protein	NA
Module 4	maker-pcu_contig_5604-snap-gene-0.1-mRNA-1	Pectinesterase	NA
Module 4	maker-pcu_contig_561-snap-gene-0.4-mRNA-1	Serine protease family S33	NA
Module 4	maker-pcu_contig_561-snap-gene-0.9-mRNA-1	Enoyl-CoA hydratase/isomerase family	NA
Module 4	maker-pcu_contig_5610-snap-gene-0.1-mRNA-1	TPR repeat protein	NA
Module 4	maker-pcu_contig_562-snap-gene-0.3-mRNA-1	Ubiquitin-activating enzyme (E1)	NA
Module 4	maker-pcu_contig_562-snap-gene-0.6-mRNA-1	Protein kinase	NA
Module 4	maker-pcu_contig_565-snap-gene-0.3-mRNA-1	Acetate kinase	NA
Module 4	maker-pcu_contig_565-snap-gene-0.4-mRNA-1	Conserved gene of unknown function	NA
Module 4	maker-pcu_contig_565-snap-gene-0.6-mRNA-1	Vesicle transport protein SFT2B	NA
Module 4	maker-pcu_contig_5653-snap-gene-0.1-mRNA-1	Lariat debranching enzyme B	NA
Module 4	maker-pcu_contig_567-snap-gene-0.6-mRNA-1	Gene of unknown function	NA
Module 4	maker-pcu_contig_568-snap-gene-0.1-mRNA-1	Commd5-prov protein	NA
Module 4	maker-pcu_contig_568-snap-gene-0.6-mRNA-1	ATP-binding Cassette (ABC) superfamily	NA
Module 4	maker-pcu_contig_5696-snap-gene-0.0-mRNA-1	RWP-RK domain-containing protein	NA
Module 4	maker-pcu_contig_5710-snap-gene-0.0-mRNA-1	M96 mating-specific protein family	NA
Module 4	maker-pcu_contig_572-snap-gene-0.8-mRNA-1	Ribosomal protein L7A	NA
Module 4	maker-pcu_contig_574-fgenesh-gene-0.2-mRNA-1	Conserved gene of unknown function	NA
Module 4	maker-pcu_contig_576-snap-gene-0.1-mRNA-1	Conserved gene of unknown function	NA
Module 4	maker-pcu_contig_578-fgenesh-gene-0.3-mRNA-1	RNA polymerase II subunit A C-terminal domain phosphatase	NA
Module 4	maker-pcu_contig_578-fgenesh-gene-0.5-mRNA-1	Actin depolymerizing factor	NA
Module 4	maker-pcu_contig_578-snap-gene-0.13-mRNA-1	Calcium/calmodulin-dependent protein kinase	NA
Module 4	maker-pcu_contig_579-snap-gene-0.6-mRNA-1	Transmembrane protein	NA
Module 4	maker-pcu_contig_58-snap-gene-0.18-mRNA-1	Mitochondrial Carrier (MC) Family	NA
Module 4	maker-pcu_contig_5814-snap-gene-0.2-mRNA-1	Conserved gene of unknown function	NA
Module 4	maker-pcu_contig_5815-snap-gene-0.2-mRNA-1	Gene of unknown function	NA
Module 4	maker-pcu_contig_584-snap-gene-0.5-mRNA-1	Bloom syndrome protein	NA
Module 4	maker-pcu_contig_584-snap-gene-0.6-mRNA-1	Bloom syndrome protein	NA
Module 4	maker-pcu_contig_5843-snap-gene-0.0-mRNA-1	Lysocardiolipin acyltransferase	NA
Module 4	maker-pcu_contig_5854-snap-gene-0.1-mRNA-1	HSF-type DNA-binding protein	NA
Module 4	maker-pcu_contig_588-fgenesh-gene-0.2-mRNA-1	Conserved gene of unknown function	NA
Module 4	maker-pcu_contig_589-snap-gene-0.4-mRNA-1	Cytochrome c/c1 heme lyase	NA
Module 4	maker-pcu_contig_59-snap-gene-0.14-mRNA-1	Cyclin A	NA
Module 4	maker-pcu_contig_591-snap-gene-0.4-mRNA-1	Conserved gene of unknown function	NA
Module 4	maker-pcu_contig_5917-snap-gene-0.0-mRNA-1	Gene of unknown function	NA
Module 4	maker-pcu_contig_595-snap-gene-0.5-mRNA-1	DNA polymerase	NA
Module 4	maker-pcu_contig_5952-snap-gene-0.1-mRNA-1	Conserved gene of unknown function	NA
Module 4	maker-pcu_contig_5952-snap-gene-0.2-mRNA-1	Transmembrane protein	NA
Module 4	maker-pcu_contig_596-snap-gene-0.7-mRNA-1	DNA replication licensing factor mcm4	NA
Module 4	maker-pcu_contig_597-snap-gene-0.5-mRNA-1	Dynein light chain Tctex-type	NA
Module 4	maker-pcu_contig_6-snap-gene-0.24-mRNA-1	Protein BREAST CANCER SUSCEPTIBILITY 1 homolog	NA
Module 4	maker-pcu_contig_6-snap-gene-0.27-mRNA-1	Phosphatidate cytidylyltransferase	NA
Module 4	maker-pcu_contig_6-snap-gene-0.31-mRNA-1	N-acetylgalactosamine kinase	NA
Module 4	maker-pcu_contig_6-snap-gene-0.37-mRNA-1	Rnpc3 protein	NA
Module 4	maker-pcu_contig_6-snap-gene-0.46-mRNA-1	Dolichyldiphosphatase	NA
Module 4	maker-pcu_contig_6014-fgenesh-gene-0.0-mRNA-1	Novel protein	NA
Module 4	maker-pcu_contig_6015-snap-gene-0.1-mRNA-1	ATP-binding Cassette (ABC) Superfamily	NA
Module 4	maker-pcu_contig_6018-fgenesh-gene-0.0-mRNA-1	Gene of unknown function	NA
Module 4	maker-pcu_contig_603-fgenesh-gene-0.0-mRNA-1	Conserved gene of unknown function	NA
Module 4	maker-pcu_contig_603-fgenesh-gene-0.3-mRNA-1	Liver stage antigen	NA
Module 4	maker-pcu_contig_606-snap-gene-0.5-mRNA-1	RNA polymerase III Rpc4	NA
Module 4	maker-pcu_contig_606-snap-gene-0.6-mRNA-1	Conserved gene of unknown function	NA
Module 4	maker-pcu_contig_6062-snap-gene-0.0-mRNA-1	Long-chain-fatty-acid-CoA ligase	NA
Module 4	maker-pcu_contig_607-fgenesh-gene-0.2-mRNA-1	Conserved gene of unknown function	NA
Module 4	maker-pcu_contig_607-snap-gene-0.6-mRNA-1	Pre-mRNA branch site protein p14	NA
Module 4	maker-pcu_contig_607-snap-gene-0.7-mRNA-1	Conserved gene of unknown function	NA
Module 4	maker-pcu_contig_616-snap-gene-0.3-mRNA-1	Conserved gene of unknown function	NA
Module 4	maker-pcu_contig_616-snap-gene-0.4-mRNA-1	Conserved gene of unknown function	NA
Module 4	maker-pcu_contig_618-snap-gene-0.4-mRNA-1	Zinc finger family protein	NA
Module 4	maker-pcu_contig_6198-snap-gene-0.1-mRNA-1	Major Facilitator Superfamily (MFS)	NA
Module 4	maker-pcu_contig_6199-snap-gene-0.2-mRNA-1	TRNA/rRNA methyltransferase family protein	NA
Module 4	maker-pcu_contig_62-snap-gene-0.12-mRNA-1	Protein recA	NA
Module 4	maker-pcu_contig_62-snap-gene-0.16-mRNA-1	Hormone-sensitive lipase	NA
Module 4	maker-pcu_contig_62-snap-gene-0.7-mRNA-1	Conserved gene of unknown function	NA
Module 4	maker-pcu_contig_621-snap-gene-0.8-mRNA-1	Si:dkey-177p2.14	NA
Module 4	maker-pcu_contig_6220-snap-gene-0.1-mRNA-1	Conserved gene of unknown function	NA
Module 4	maker-pcu_contig_623-snap-gene-0.10-mRNA-1	Conserved gene of unknown function	NA
Module 4	maker-pcu_contig_623-snap-gene-0.11-mRNA-1	Mevalonate kinase	NA
Module 4	maker-pcu_contig_624-fgenesh-gene-0.0-mRNA-1	50S ribosomal protein L17	NA
Module 4	maker-pcu_contig_624-snap-gene-0.5-mRNA-1	Conserved gene of unknown function	NA
Module 4	maker-pcu_contig_624-snap-gene-0.7-mRNA-1	Serine/threonine-protein kinase DDB_G0280111	NA
Module 4	maker-pcu_contig_6240-snap-gene-0.1-mRNA-1	Peptidyl-prolyl cis-trans isomerase NIMA-interacting 1	NA
Module 4	maker-pcu_contig_6275-fgenesh-gene-0.0-mRNA-1	Pyruvate kinase	NA
Module 4	maker-pcu_contig_628-snap-gene-0.2-mRNA-1	Conserved gene of unknown function	NA
Module 4	maker-pcu_contig_63-fgenesh-gene-0.0-mRNA-1	LYR motif-containing protein	NA
Module 4	maker-pcu_contig_63-snap-gene-0.26-mRNA-1	Mediator complex subunit 20	NA
Module 4	maker-pcu_contig_6321-fgenesh-gene-0.0-mRNA-1	CRN domain-containing protein-containing protein	NA
Module 4	maker-pcu_contig_6322-snap-gene-0.0-mRNA-1	Conserved gene of unknown function	NA
Module 4	maker-pcu_contig_633-snap-gene-0.1-mRNA-1	Conserved gene of unknown function	NA
Module 4	maker-pcu_contig_636-snap-gene-0.5-mRNA-1	Conserved gene of unknown function	NA
Module 4	maker-pcu_contig_64-snap-gene-0.14-mRNA-1	NADPH:adrenodoxin oxidoreductase	NA
Module 4	maker-pcu_contig_64-snap-gene-0.27-mRNA-1	Gene of unknown function	NA
Module 4	maker-pcu_contig_640-snap-gene-0.3-mRNA-1	Myosin	NA
Module 4	maker-pcu_contig_641-snap-gene-0.7-mRNA-1	N-acetyltransferase	NA
Module 4	maker-pcu_contig_6429-snap-gene-0.0-mRNA-1	Conserved gene of unknown function	NA
Module 4	maker-pcu_contig_644-snap-gene-0.2-mRNA-1	Methyltransferase	NA
Module 4	maker-pcu_contig_648-snap-gene-0.4-mRNA-1	Pre-mRNA-splicing factor 18	NA
Module 4	maker-pcu_contig_649-snap-gene-0.7-mRNA-1	Gene of unknown function	NA
Module 4	maker-pcu_contig_65-snap-gene-0.14-mRNA-1	Exonuclease 1	NA
Module 4	maker-pcu_contig_65-snap-gene-0.15-mRNA-1	Conserved gene of unknown function	NA
Module 4	maker-pcu_contig_6509-snap-gene-0.1-mRNA-1	Pre-rRNA-processing protein ESF2	NA
Module 4	maker-pcu_contig_6509-snap-gene-0.2-mRNA-1	Conserved gene of unknown function	NA
Module 4	maker-pcu_contig_6521-snap-gene-0.1-mRNA-1	DNA polymerase	NA
Module 4	maker-pcu_contig_653-snap-gene-0.2-mRNA-1	Ankyrin 2,3/unc44, partial	NA
Module 4	maker-pcu_contig_658-snap-gene-0.7-mRNA-1	Conserved gene of unknown function	NA
Module 4	maker-pcu_contig_662-snap-gene-0.4-mRNA-1	Hypothetical leucine rich repeat and GCG domain-containing receptor	NA
Module 4	maker-pcu_contig_664-snap-gene-0.7-mRNA-1	Ras	NA
Module 4	maker-pcu_contig_665-snap-gene-0.4-mRNA-1	Mismatch repair endonuclease pms1	NA
Module 4	maker-pcu_contig_666-snap-gene-0.3-mRNA-1	Ribokinase	NA
Module 4	maker-pcu_contig_6665-snap-gene-0.0-mRNA-1	Conserved gene of unknown function	NA
Module 4	maker-pcu_contig_6666-snap-gene-0.1-mRNA-1	DEAD/DEAH box RNA helicase	NA
Module 4	maker-pcu_contig_67-snap-gene-0.7-mRNA-1	Conserved gene of unknown function	NA
Module 4	maker-pcu_contig_674-snap-gene-0.10-mRNA-1	Conserved gene of unknown function	NA
Module 4	maker-pcu_contig_674-snap-gene-0.11-mRNA-1	PIH1	NA
Module 4	maker-pcu_contig_674-snap-gene-0.12-mRNA-1	RNA-binding protein	NA
Module 4	maker-pcu_contig_679-snap-gene-0.4-mRNA-1	F-box protein	NA
Module 4	maker-pcu_contig_680-snap-gene-0.4-mRNA-1	Carbohydrate esterase	NA
Module 4	maker-pcu_contig_683-snap-gene-0.7-mRNA-1	Peptidoglycan biosynthesis protein	NA
Module 4	maker-pcu_contig_6844-snap-gene-0.1-mRNA-1	Gene of unknown function	NA
Module 4	maker-pcu_contig_685-snap-gene-0.5-mRNA-1	Conserved gene of unknown function	NA
Module 4	maker-pcu_contig_6855-snap-gene-0.1-mRNA-1	Helicase, lymphoid-specific	NA
Module 4	maker-pcu_contig_6873-snap-gene-0.0-mRNA-1	Diacylglycerol kinase	NA
Module 4	maker-pcu_contig_688-snap-gene-0.8-mRNA-1	Gene of unknown function	NA
Module 4	maker-pcu_contig_69-snap-gene-0.8-mRNA-1	TRNA(Ile)-lysidine synthase	NA
Module 4	maker-pcu_contig_6903-snap-gene-0.1-mRNA-1	Catalase-peroxidase	NA
Module 4	maker-pcu_contig_6919-snap-gene-0.1-mRNA-1	MYND domain containing protein	NA
Module 4	maker-pcu_contig_6930-snap-gene-0.0-mRNA-1	Conserved gene of unknown function	NA
Module 4	maker-pcu_contig_694-snap-gene-0.2-mRNA-1	ADP-ribosylation factor GTPase-activating protein	NA
Module 4	maker-pcu_contig_697-snap-gene-0.3-mRNA-1	Glycoside hydrolase	NA
Module 4	maker-pcu_contig_697-snap-gene-0.4-mRNA-1	Bardet-Biedl syndrome 9	NA
Module 4	maker-pcu_contig_697-snap-gene-0.7-mRNA-1	Aspartyl protease family A01B	NA
Module 4	maker-pcu_contig_697-snap-gene-0.8-mRNA-1	Conserved gene of unknown function	NA
Module 4	maker-pcu_contig_698-snap-gene-0.6-mRNA-1	Ubiquitin	NA
Module 4	maker-pcu_contig_699-fgenesh-gene-0.1-mRNA-1	Dolichol-phosphate mannosyltransferase subunit 3	NA
Module 4	maker-pcu_contig_7-snap-gene-0.28-mRNA-1	Conserved gene of unknown function	NA
Module 4	maker-pcu_contig_7-snap-gene-0.30-mRNA-1	WD domain-containing protein	NA
Module 4	maker-pcu_contig_70-snap-gene-0.14-mRNA-1	Protein FAM188A	NA
Module 4	maker-pcu_contig_7014-snap-gene-0.1-mRNA-1	Protein kinase	NA
Module 4	maker-pcu_contig_7025-fgenesh-gene-0.0-mRNA-1	Conserved oligomeric Golgi complex subunit	NA
Module 4	maker-pcu_contig_705-fgenesh-gene-0.3-mRNA-1	Amylopullulanase	NA
Module 4	maker-pcu_contig_7050-snap-gene-0.0-mRNA-1	Conserved gene of unknown function	NA
Module 4	maker-pcu_contig_7050-snap-gene-0.1-mRNA-1	Transmembrane protein	NA
Module 4	maker-pcu_contig_707-snap-gene-0.9-mRNA-1	Tcte-1 peptide	NA
Module 4	maker-pcu_contig_708-snap-gene-0.4-mRNA-1	RWP-RK domain-containing protein	NA
Module 4	maker-pcu_contig_71-snap-gene-0.11-mRNA-1	Conserved gene of unknown function	NA
Module 4	maker-pcu_contig_713-snap-gene-0.7-mRNA-1	Conserved gene of unknown function	NA
Module 4	maker-pcu_contig_717-snap-gene-0.6-mRNA-1	Ser/thr kinase	NA
Module 4	maker-pcu_contig_7173-snap-gene-0.3-mRNA-1	Conserved gene of unknown function	NA
Module 4	maker-pcu_contig_724-snap-gene-0.5-mRNA-1	Glutathione S-transferase	NA
Module 4	maker-pcu_contig_7241-snap-gene-0.0-mRNA-1	Alkyldihydroxyacetonephosphate synthase, peroxisomal	NA
Module 4	maker-pcu_contig_7244-fgenesh-gene-0.0-mRNA-1	Homology to unknown gene	NA
Module 4	maker-pcu_contig_725-snap-gene-0.3-mRNA-1	Gene of unknown function	NA
Module 4	maker-pcu_contig_725-snap-gene-0.4-mRNA-1	RNA (Guanine-9-)-methyltransferase domain-containing protein	NA
Module 4	maker-pcu_contig_7264-snap-gene-0.1-mRNA-1	Thioredoxin H-type	NA
Module 4	maker-pcu_contig_7275-snap-gene-0.1-mRNA-1	Conserved gene of unknown function	NA
Module 4	maker-pcu_contig_729-snap-gene-0.3-mRNA-1	Conserved gene of unknown function	NA
Module 4	maker-pcu_contig_729-snap-gene-0.6-mRNA-1	Conserved gene of unknown function	NA
Module 4	maker-pcu_contig_7294-snap-gene-0.2-mRNA-1	Conserved gene of unknown function	NA
Module 4	maker-pcu_contig_73-snap-gene-0.12-mRNA-1	Conserved gene of unknown function	NA
Module 4	maker-pcu_contig_735-snap-gene-0.2-mRNA-1	Bzip transcription factor	PF00170(bZIP transcription factor, bZIP-1)
Module 4	maker-pcu_contig_7356-snap-gene-0.2-mRNA-1	Translation initiation factor IF-2	NA
Module 4	maker-pcu_contig_737-snap-gene-0.8-mRNA-1	Conserved gene of unknown function	NA
Module 4	maker-pcu_contig_737-snap-gene-0.9-mRNA-1	Glutaredoxin	NA
Module 4	maker-pcu_contig_741-snap-gene-0.5-mRNA-1	Conserved gene of unknown function	NA
Module 4	maker-pcu_contig_742-fgenesh-gene-0.2-mRNA-1	Conserved gene of unknown function	NA
Module 4	maker-pcu_contig_743-snap-gene-0.3-mRNA-1	Conserved gene of unknown function	NA
Module 4	maker-pcu_contig_744-snap-gene-0.4-mRNA-1	Conserved gene of unknown function	NA
Module 4	maker-pcu_contig_7454-snap-gene-0.1-mRNA-1	Arginyl-tRNA synthetase	NA
Module 4	maker-pcu_contig_7496-fgenesh-gene-0.0-mRNA-1	Conserved gene of unknown function	NA
Module 4	maker-pcu_contig_75-fgenesh-gene-0.1-mRNA-1	Drug/Metabolite Transporter (DMT) Superfamily	NA
Module 4	maker-pcu_contig_75-snap-gene-0.10-mRNA-1	Conserved gene of unknown function	NA
Module 4	maker-pcu_contig_7505-snap-gene-0.0-mRNA-1	ATP-dependent helicase	NA
Module 4	maker-pcu_contig_751-snap-gene-0.6-mRNA-1	Serine protease family S54	NA
Module 4	maker-pcu_contig_7546-snap-gene-0.0-mRNA-1	Catalase	NA
Module 4	maker-pcu_contig_7560-snap-gene-0.3-mRNA-1	Peroxisomal targeting signal 2 receptor	NA
Module 4	maker-pcu_contig_757-snap-gene-0.12-mRNA-1	Conserved hypothetical protein	NA
Module 4	maker-pcu_contig_759-snap-gene-0.5-mRNA-1	Ribosomal large subunit pseudouridine synthase F	NA
Module 4	maker-pcu_contig_759-snap-gene-0.9-mRNA-1	Drug/Metabolite Transporter (DMT) Superfamily	NA
Module 4	maker-pcu_contig_76-fgenesh-gene-0.3-mRNA-1	Ribosomal RNA methyltransferase	NA
Module 4	maker-pcu_contig_76-snap-gene-0.19-mRNA-1	WDR67 protein, partial	NA
Module 4	maker-pcu_contig_76-snap-gene-0.24-mRNA-1	McKusick-Kaufman syndrome	NA
Module 4	maker-pcu_contig_76-snap-gene-0.25-mRNA-1	Riboflavin kinase	NA
Module 4	maker-pcu_contig_7603-snap-gene-0.0-mRNA-1	Conserved gene of unknown function	NA
Module 4	maker-pcu_contig_761-snap-gene-0.4-mRNA-1	Aromatic amino acid decarboxylase	NA
Module 4	maker-pcu_contig_763-snap-gene-0.3-mRNA-1	Gene of unknown function	NA
Module 4	maker-pcu_contig_764-snap-gene-0.5-mRNA-1	Isoform 3d of Autoimmune regulator	NA
Module 4	maker-pcu_contig_7643-snap-gene-0.1-mRNA-1	Heat shock transcription factor 1b	PF00447(Heat shock factor (HSF)-type, DNA-binding)
Module 4	maker-pcu_contig_765-snap-gene-0.3-mRNA-1	Conserved gene of unknown function	NA
Module 4	maker-pcu_contig_7661-snap-gene-0.0-mRNA-1	Conserved gene of unknown function	NA
Module 4	maker-pcu_contig_767-snap-gene-0.5-mRNA-1	Molybdenum cofactor synthesis protein 2 large subunit	NA
Module 4	maker-pcu_contig_7685-snap-gene-0.0-mRNA-1	Major Facilitator Superfamily (MFS)	NA
Module 4	maker-pcu_contig_772-snap-gene-0.6-mRNA-1	Conserved gene of unknown function	NA
Module 4	maker-pcu_contig_7762-snap-gene-0.1-mRNA-1	GPI-anchored protein	NA
Module 4	maker-pcu_contig_783-snap-gene-0.3-mRNA-1	Gene of unknown function	NA
Module 4	maker-pcu_contig_7840-snap-gene-0.2-mRNA-1	Conserved gene of unknown function	NA
Module 4	maker-pcu_contig_785-snap-gene-0.4-mRNA-1	Conserved gene of unknown function	NA
Module 4	maker-pcu_contig_79-snap-gene-0.10-mRNA-1	Ser/thr protein kinase	NA
Module 4	maker-pcu_contig_79-snap-gene-0.9-mRNA-1	GTPase	NA
Module 4	maker-pcu_contig_790-snap-gene-0.7-mRNA-1	Hypoxia induced protein, conserved region	NA
Module 4	maker-pcu_contig_7914-snap-gene-0.1-mRNA-1	ATP-binding Cassette (ABC) Superfamily	NA
Module 4	maker-pcu_contig_795-snap-gene-0.4-mRNA-1	Two-component sensor histidine kinase	NA
Module 4	maker-pcu_contig_795-snap-gene-0.5-mRNA-1	NIPA-like domain containing 2	NA
Module 4	maker-pcu_contig_8-snap-gene-0.16-mRNA-1	Phosphatidylinositol-4-phosphate-5-kinase (PI-PIPK-B)	NA
Module 4	maker-pcu_contig_80-snap-gene-0.10-mRNA-1	Zinc finger family protein	NA
Module 4	maker-pcu_contig_80-snap-gene-0.17-mRNA-1	Tyrosine phospatase	NA
Module 4	maker-pcu_contig_803-snap-gene-0.6-mRNA-1	Cytoplasmic membrane protein	NA
Module 4	maker-pcu_contig_805-snap-gene-0.5-mRNA-1	Gene of unknown function	NA
Module 4	maker-pcu_contig_806-snap-gene-0.6-mRNA-1	Regulator of chromosome condensation (RCC1)	NA
Module 4	maker-pcu_contig_808-snap-gene-0.12-mRNA-1	Iron-sulfur cluster assembly protein	NA
Module 4	maker-pcu_contig_81-fgenesh-gene-0.6-mRNA-1	Conserved gene of unknown function	NA
Module 4	maker-pcu_contig_81-snap-gene-0.13-mRNA-1	Oxidoreductase/ transition metal ion binding protein	NA
Module 4	maker-pcu_contig_81-snap-gene-0.16-mRNA-1	Conserved gene of unknown function	NA
Module 4	maker-pcu_contig_813-snap-gene-0.8-mRNA-1	Septum formation protein Maf	NA
Module 4	maker-pcu_contig_819-snap-gene-0.5-mRNA-1	Conserved gene of unknown function	NA
Module 4	maker-pcu_contig_8198-snap-gene-0.0-mRNA-1	M96 mating-specific protein family	NA
Module 4	maker-pcu_contig_82-snap-gene-0.21-mRNA-1	Conserved gene of unknown function	NA
Module 4	maker-pcu_contig_8276-snap-gene-0.1-mRNA-1	Conserved gene of unknown function	NA
Module 4	maker-pcu_contig_829-snap-gene-0.5-mRNA-1	Acid phosphatase	NA
Module 4	maker-pcu_contig_83-snap-gene-0.13-mRNA-1	Conserved hypothetical protein	NA
Module 4	maker-pcu_contig_83-snap-gene-0.7-mRNA-1	Equilibrative Nucleoside Transporter (ENT) Family	NA
Module 4	maker-pcu_contig_83-snap-gene-0.8-mRNA-1	Cyclin-L1	NA
Module 4	maker-pcu_contig_830-snap-gene-0.6-mRNA-1	Receptor accessory protein 3, like	NA
Module 4	maker-pcu_contig_830-snap-gene-0.7-mRNA-1	Conserved gene of unknown function	NA
Module 4	maker-pcu_contig_834-snap-gene-0.2-mRNA-1	Pc21g02280 protein	NA
Module 4	maker-pcu_contig_836-snap-gene-0.7-mRNA-1	Conserved gene of unknown function	NA
Module 4	maker-pcu_contig_837-snap-gene-0.3-mRNA-1	Tripartite motif-containing 35, partial	NA
Module 4	maker-pcu_contig_839-snap-gene-0.4-mRNA-1	Acyltransferase family	NA
Module 4	maker-pcu_contig_8398-snap-gene-0.1-mRNA-1	Conserved gene of unknown function	NA
Module 4	maker-pcu_contig_84-snap-gene-0.13-mRNA-1	Thiamin pyrophosphokinase	NA
[truncated: 1,148 more rows]
