# Supplementary material for: mRNA-Seq Analysis of the Pseudoperonospora cubensis Transcriptome During Cucumber (Cucumis sativus L.) Infection
Source: PLoS One. 2012 Apr 24;7(4):e35796. doi: 10.1371/journal.pone.0035796 (PMC3335787; doi:10.1371/journal.pone.0035796)
Supplement: Table S7 — Number of transcription factor-related domains present in the genes expressed at different time points of Cucumis sativus infection by Pseudoperonospora cubensis . Shown is the Pfam domain accession, Pfam domain name and description. (XLSX) [file pone.0035796.s010.xlsx]

## Sheet: Sheet1
Table S7. Number of transcription factor-related domains present in the genes expressed at different time-points of Cucumis sativus infection by Pseudoperonospora cubensis. Shown is the Pfam domain accession, Pfam domain name and description.
Pfam accession (domain)	Description	Total⌘	1 dpi§	2 dpi	3 dpi	4 dpi	6 dpi	8 dpi
PF00847 (AP2)	Pathogenesis-related transcriptional factor/ERF	1	1	1	1	1	1	1
PF07524 (Bromo_TP)	Bromodomain transcription factor	1	-	-	-	1	1	1
PF00170 (bZIP_1)	bZIP transcription factor, bZIP-1	10	3	2	8	6	4	8
PF07716 (bZIP_2)	Basic leucine zipper	2	1	-	-	1	-	2
PF02559 (CarD_TRCF)	Transcription factor CarD	2	1	-	-	-	-	-
PF02045 (CBFB_NFYA)	CCAAT-binding transcription factor, subunit B	7	-	-	-	1	-	2
PF00808 (CBFD_NFYB_HMF)	Transcription factor CBF/NF-Y/archaeal histone	9	-	-	-	3	2	5
PF02319 (E2F_TDP)	Transcription factor E2F/dimerisation partner (TDP)	3	-		1	1	4	3
PF00010 (HLH)	Helix-loop-helix DNA-binding domain	9	-	2	1	2	2	4
PF00046 (Homeobox)	Homeobox	5	-	2	1	3	3	3
PF00447 (HSF_DNA_bind)	Heat shock factor (HSF)-type, DNA-binding	15	1	3	2	7	8	12
PF00126 (HTH_1)	HTH transcriptional regulator, LysR	91	6	1	-	-	-	-
PF01486 (K-box)	Transcription factor, K-box	4	-	-	-	1	1	1
PF00249 (Myb_DNA-binding)	Myb, DNA-binding	39	8	8	8	18	18	29
PF00319 (SRF-TF)	Transcription factor, MADS-box	1	-	-	-	-	2	1
PF04719 (TAFII28)	TAFII28-like protein	1	-	-	-	-	-	1
PF04658 (TAFII55_N)	TAFII55 protein, conserved region	1	-	-	-	-	-	1
PF00352 (TBP)	TATA-box binding	3	-	-	-	-	-	1
PF03849 (Tfb2)	Transcription factor Tfb2	1	-	-	-	1	1	1
PF03845 (Tfb4)	Transcription factor Tfb4	1	-	-	-	-	-	1
PF03847 (TFIID_20kDa)	Transcription initiation factor TFIID, 20 kDa subunit	3	-	-	-	-	-	2
PF02270 (TFIIF_beta)	Transcription initiation factor IIF, beta subunit	4	-	-	-	-	-	2
PF00096 (zf-C2H2)	Zinc finger, C2H2-type	13	3	5	3	7	4	10
PF07571 (DUF1546)	Protein of unknown function DUF1546	1	-	-	-	1	-	-
PF00196 (GerE)	Transcriptional regulator LuxR, C-terminal	13	1	-	-	-	-	-
PF04542 (Sigma70_r2)	RNA polymerase sigma-70 region 2	4	1	-	-	-	-	-
PF08281 (Sigma70_r4_2	RNA polymerase sigma factor 70, region 2	3	1	-	-	-	-	-
	Total	247	27	24	25	55	51	91
⌘Total number of transcription factor-related domains present in Pseudoperonospora cubensis genome.
§dpi, days post-inoculation.
